# Supplementary material for: Effect of Serum Ferritin on the Prognosis of Patients with Sepsis: Data from the MIMIC-IV Database
Source: Emerg Med Int. 2022 Dec 6;2022:2104755. doi: 10.1155/2022/2104755 (PMC9747303; doi:10.1155/2022/2104755)
Supplement: Supplementary Materials — The structured data used in the present study are presented in the Supplemental files S2. The completed STROBE guideline is shown in Supplemental files S3. [file 2104755.f1.zip]

Archive with 3 entries (3 files):
- Supplemental file1 Additional data for present study (1).docx
- Supplemental file2 Raw data of present study (1).txt
- Supplemental file3 The completed STROBE guideline of present study (1).pdf
