# Supplementary material for: Effect of Serum Ferritin on the Prognosis of Patients with Sepsis: Data from the MIMIC-IV Database
Source: Emerg Med Int. 2022 Dec 6;2022:2104755. doi: 10.1155/2022/2104755 (PMC9747303; doi:10.1155/2022/2104755)
Supplement: Supplementary Materials — The structured data used in the present study are presented in the Supplemental files S2. The completed STROBE guideline is shown in Supplemental files S3. [file 2104755.f1.zip › Supplemental file2 Raw data of present study (1).txt]

subject_id	hadm_id	stay_id	age	HT	HF	DM	CHD	ckd	anemia	temperature_value	heart_rate_value	respiratory_value	spo2_value	mbp_value	wbc_value	hemoglobin_value	creatinine_value	lactate_value	female	emergency_admissions	culture_positive	lung_culture_positive_2	urine_culture_positive_2	blood_culture_positive_2	other_culture_positive_2	sofa_score	sepsis	ferritin_initial	ferritin_max	ferritin_min	ferritin_mean	transferrin_initial	serumiron_initial	tibc_initial	hospital_los	icu_los	morta_28	morta_90	hospital_morta	ICU_morta	vasopressor_using	aki	normal_range	ferritin_overexpression	ferritin_interval	ferritin_d1	ferritin_d2	ferritin_d3	ferritin_d4
12098571	20553314	30004798	65	0	1	1	1	1	1	37	79	23	97	78	10	12	8	2	0	1	0	0		0	0	4	1	1990	1990	1990	1990	147	65	191	7	1	0	0	0	0	0	1	2	1	1800	0	0	0	0
14569364	20870580	30005707	83	1	0	0	0	0	0	37	89	17	100	63	5	13	3	3	0	1	0	0		0	0	3	1	645	645	645	645	70	30	91	14	11	0	0	0	0	1	1	2	1	600	0	0	0	1
16828280	22369507	30007565	85	1	1	1	0	0	1	34	90	20	93	93	8	12	3	4	0	1	1	1	0	0	0	4	1	147	147	147	147	159	60	203	21	19	0	0	0	0	1	1	1	0	200	0	1	0	0
14992874	23580850	30010785	72	0	1	0	0	0	1	38	62	10	98	46	6	9	1	2	1	1	0	0		0	0	4	1	16	16	16	16	379	8	493	9	3	0	0	0	0	0	1	1	0	200	0	1	0	0
15752366	20987629	30012063	85	0	1	0	0	1	1	37	92	13	95	82	13	10	2	2	0	1	0	0		0	0	4	1	16	16	16	16	402	9	523	16	2	0	0	0	0	0	0	0	0	0	1	0	0	0
14475287	26952283	30014019	86	0	1	1	0	1	0	37	88	13	100	61	16	8	1	2	1	1	0	0		0	0	2	1	1925	1925	776	1351	115	61	150	26	24	1	1	1	1	1	1	2	1	1800	0	0	0	0
11800562	22890668	30017572	30	0	0	0	0	0	1	36	85	20	99	64	13	12	1	2	0	1	0	0		0	0	4	1	85	85	85	85	167	50	217	5	3	0	0	0	0	1	0	1	0	200	0	1	0	0
14351751	28182927	30025200	61	0	1	0	0	1	1	38	109	12	94	57	4	8	1	2	0	1	1	0	0	1	0	3	1	1059	1059	1059	1059	215	30	280	5	5	1	1	1	1	0	1	2	1	1000	0	0	0	0
12193932	21076763	30025720	62	1	0	0	0	0	1	37	117	19	99	58	12	8	2	3	0	1	1	0	0	1	0	2	1	442	442	442	442	146	69	190	2	3	1	1	1	1	1	1	2	1	400	0	0	1	0
13771243	20491701	30026046	42	0	0	0	0	0	0	38	127	22	100	77	14	12	1	1	1	1	0	0		0	0	4	1	783	1000	783	892	180	26	234	1	2	1	1	1	1	1	0	2	1	600	0	0	0	1
10698487	21523370	30030798	53	1	0	1	0	0	0	36	91	26	100	82	15	14	1	2	0	1	1	0	0	0	1	2	1	1250	1250	1250	1250	157	23	204	6	6	1	1	1	1	0	1	2	1	1200	0	0	0	0
18378292	21631560	30032418	56	1	0	0	0	0	0	37	80	15	96	74	7	10	1	3	0	1	1	0	0	0	1	6	1	2135	2362	2135	2249	101	120	118	26	5	1	1	0	0	0	1	2	1	2000	0	0	0	0
15895725	26898969	30033718	51	1	0	0	0	0	1	38	85	19	91	67	15	8	1	1	1	1	0	0		0	0	5	1	547	547	547	547	142	52	185	22	8	1	1	1	0	0	1	2	1	400	0	0	1	0
17648953	25972557	30034751	68	0	0	0	0	1	1	36	75	20	94	52	17	8	1	4	1	1	0	0		0	0	3	1	1551	1551	1551	1551	154	22	200	23	1	0	0	0	0	1	0	2	1	1400	0	0	0	0
15245121	29820007	30037986	62	0	0	1	0	1	1	37	75	22	100	66	18	8	4	2	0	1	0	0		0	0	9	1	2986	2986	2986	2986	212	182	276	15	5	0	0	0	0	0	1	2	1	2000	0	0	0	0
14430169	24242475	30038081	29	0	0	0	0	0	1	37	128	16	97	95	3	10	0	1	1	1	0	0		0	0	3	1	107	107	107	107	161	9	209	12	4	0	0	0	0	0	0	1	0	200	0	1	0	0
16361542	27394259	30039400	67	1	0	0	0	0	0	37	94	26	98	76	12	7	1	1	1	1	0	0		0	0	2	1	1970	1970	1970	1970	191	13	248	11	2	0	0	0	0	0	0	2	1	1800	0	0	0	0
19518348	24328934	30041848	66	0	1	1	0	1	1	37	73	20	97	85	11	11	3	1	0	1	0	0		0	0	6	1	592	592	592	592	149	28	194	18	18	1	1	1	1	0	1	2	1	400	0	0	1	0
11116453	25230255	30042201	84	0	1	0	0	0	1	37	80	25	94	58	15	8	2	2	0	0	1	1	0	0	0	6	1	77	77	77	77	198	13	257	10	3	0	0	0	0	1	1	1	0	200	0	1	0	0
16264356	26178740	30046600	62	1	0	0	0	0	0	36	114	23	98	95	8	9	1	2	0	1	0	0		0	0	3	1	854	854	854	854	141	164	183	9	5	0	0	0	0	0	1	2	1	800	0	0	0	0
17532786	20427894	30050739	23	0	0	1	0	0	1	37	70	15	97	53	6	12	1	2	0	1	0	0		0	0	2	1	386	386	386	386	120	135	156	3	1	0	0	0	0	0	0	1	0	200	0	1	0	0
10740917	25799544	30053796	27	0	0	0	0	0	0	36	108	14	100	94	9	12	1	1	1	1	1	0	1	1	0	2	1	99	99	99	99	161	53	209	30	7	0	0	0	0	0	1	1	0	200	0	1	0	0
13077594	22574617	30056766	68	1	0	1	1	0	1	38	114	17	100	58	14	9	1	2	1	1	1	0	1	0	0	2	1	477	477	477	477	120	31	156	18	18	0	0	0	0	0	1	2	1	400	0	0	1	0
18185020	29765017	30060166	63	1	0	1	0	0	1	36	95	20	87	121	13	9	6	2	1	1	0	0		0	0	2	1	1516	1516	1516	1516	122	52	159	8	3	0	0	0	0	1	0	2	1	1400	0	0	0	0
11508679	20568339	30062477	78	0	1	0	1	1	0	37	96	20	96	64	35	11	3	1	1	1	1	1	1	0	0	2	1	148	148	148	148	185	34	241	14	14	0	0	0	0	0	1	1	0	200	0	1	0	0
11570162	25361762	30063714	68	1	0	0	1	0	0	36	59	16	98	58	6	10	1	4	1	1	0	0		0	0	2	1	1707	1890	1707	1799	107	65	139	54	40	0	0	0	0	1	1	2	1	1600	0	0	0	0
13202910	25174412	30063946	69	1	0	0	0	0	0	37	109	25	93	95	12	14	1	1	0	0	0	0		0	0	2	1	410	410	410	410	191	74	248	17	9	1	1	1	0	0	0	2	1	400	0	0	1	0
15687963	25311840	30072554	60	0	1	0	0	0	1	37	139	20	99	65	21	13	5	2	0	1	0	0		0	0	7	1	346	346	346	346	169	26	220	16	16	0	0	0	0	0	1	1	0	200	0	1	0	0
17336894	26315447	30072641	91	0	0	1	0	0	0	34	85	19	100	63	4	11	1	3	1	1	1	0	1	0	0	2	1	288	288	288	288	37	14	48	22	7	0	0	0	0	0	1	2	1	400	0	0	1	0
11164899	26495581	30073626	72	0	0	0	0	0	0	37	67	22	94	62	4	12	1	1	0	1	0	0		0	0	5	1	2797	2797	2797	2797	157	53	205	5	1	0	0	0	0	0	0	2	1	2000	0	0	0	0
15392213	23230307	30076497	36	0	0	0	0	0	1	37	109	19	95	77	4	8	1	2	1	1	0	0		0	0	5	1	253	253	253	253	168	193	218	3	2	0	0	0	0	0	1	2	1	400	0	0	1	0
12501907	25355884	30080467	54	0	1	0	1	0	0	37	88	16	98	64	9	10	1	2	1	1	0	0		0	0	2	1	339	339	339	339	157	37	204	5	2	0	0	0	0	0	1	2	1	400	0	0	1	0
17648769	21188205	30097127	84	0	1	1	0	1	1	36	65	9	100	68	15	7	4	1	1	1	1	0	1	0	0	6	1	582	654	582	618	51	71	66	6	6	1	1	1	1	1	1	2	1	400	0	0	1	0
11058564	28642953	30099479	47	1	0	0	0	0	0	37	85	27	93	80	3	10	1	1	1	1	0	0		0	0	3	1	369	369	369	369	125	26	163	8	1	0	0	0	0	1	0	2	1	400	0	0	1	0
13184298	21917519	30099685	58	0	0	1	0	1	1	37	67	32	95	63	13	9	7	2	0	1	0	0		0	0	12	1	230	230	230	230	99	118	129	39	9	0	0	0	0	1	1	1	0	200	0	1	0	0
18652120	26780756	30105466	34	0	0	0	0	0	0	38	82	14	100	79	9	13	1	1	0	1	0	0		0	0	2	1	560	560	560	560	215	210	280	5	5	0	0	0	0	0	0	2	1	400	0	0	1	0
18475237	21923841	30112339	67	0	1	1	0	1	1	37	76	30	100	72	12	13	2	1	0	1	1	1	0	0	0	2	1	132	132	132	132	171	31	218	25	5	0	0	0	0	1	1	1	0	200	0	1	0	0
15947954	25940433	30121635	78	1	1	0	1	0	1	38	76	17	99	67	20	10	1	1	1	1	0	0		0	0	5	1	488	488	488	488	164	37	216	24	9	0	0	0	0	1	1	2	1	400	0	0	1	0
12149070	26440183	30129989	75	0	1	1	0	1	0	37	60	18	97	59	22	12	4	3	0	1	0	0		0	0	3	1	670	670	670	670	146	57	186	13	13	1	1	1	1	1	1	2	1	600	0	0	0	1
15179179	23048200	30131613	42	1	0	0	0	0	0	37	82	20	95	78	6	13	1	1	0	1	1	1	0	0	0	7	1	64	64	64	64	282	138	367	12	10	0	0	0	0	0	1	1	0	200	0	1	0	0
13158876	27755570	30141905	69	1	0	1	0	0	1	37	89	21	100	67	8	9	2	1	1	1	1	0	1	0	0	3	1	557	557	557	557	162	84	211	5	2	0	0	0	0	0	0	2	1	400	0	0	1	0
10873131	26584893	30144893	77	0	1	0	1	0	0	36	72	16	100	62	21	8	2	2	1	0	0	0		0	0	2	1	78	78	78	78	234	27	304	18	6	1	1	0	0	0	1	1	0	200	0	1	0	0
15017391	22729873	30154772	83	0	1	1	0	1	1	38	89	32	99	46	38	9	4	2	1	1	0	0		0	0	7	1	288	288	288	288	125	34	163	8	6	1	1	0	0	0	1	2	1	400	0	0	1	0
13557547	24718543	30156928	60	0	0	0	0	1	1	37	73	18	97	103	19	7	8	2	0	0	0	0		0	0	4	1	561	561	561	561	116	9	151	13	1	0	0	0	0	0	1	2	1	400	0	0	1	0
15331526	27858079	30159869	95	0	1	0	0	1	1	38	74	25	95	91	14	7	1	1	1	1	0	0		0	0	2	1	570	570	570	570	196	29	257	37	3	0	0	0	0	0	1	2	1	400	0	0	1	0
18198130	22485070	30162015	82	1	0	0	0	0	1	37	78	17	100	58	26	10	1	2	1	1	0	0		0	0	2	1	247	247	247	247	134	11	174	14	3	0	0	0	0	0	1	2	1	400	0	0	1	0
16341421	20909627	30162822	63	1	0	0	0	0	1	37	102	27	100	90	13	7	7	1	1	1	0	0		0	0	5	1	426	426	418	422	274	60	356	18	3	0	0	0	0	1	1	2	1	400	0	0	1	0
15742396	25818443	30163645	67	1	0	1	0	0	1	36	97	18	100	89	22	9	5	4	1	0	1	1	1	0	0	10	1	267	267	267	267	97	44	126	18	7	0	0	0	0	1	1	2	1	400	0	0	1	0
15331667	27412991	30167698	77	0	1	1	1	1	1	36	91	21	94	49	13	8	7	2	0	1	0	0		0	0	5	1	343	343	343	343	154	13	200	7	4	0	0	0	0	0	1	1	0	200	0	1	0	0
14836177	28102452	30170059	79	1	0	0	1	0	1	37	106	34	99	80	6	11	2	2	0	0	1	1	0	0	1	4	1	1235	1235	784	935	94	27	114	65	59	0	1	1	1	1	1	2	1	1200	0	0	0	0
11569093	26359683	30172516	72	1	0	1	1	0	1	36	104	24	97	61	14	12	1	2	1	1	0	0		0	0	3	1	371	371	371	371	102	8	133	15	4	0	0	0	0	0	1	2	1	400	0	0	1	0
18637496	26725335	30173242	45	0	0	0	1	0	0	37	84	22	97	58	7	11	0	3	1	1	1	1	0	1	0	5	1	1105	1105	1105	1105	105	35	137	37	4	0	1	1	0	0	1	2	1	1000	0	0	0	0
15622128	26354646	30178919	67	0	1	1	1	0	1	37	88	17	98	83	17	9	1	3	0	1	0	0		0	0	9	1	723	723	723	723	166	100	211	20	9	0	0	0	0	1	1	2	1	600	0	0	0	1
19459798	22916571	30183959	71	0	1	0	1	1	1	37	104	23	98	100	8	7	3	1	0	1	0	0		0	0	2	1	136	136	136	136	246	20	320	7	1	0	0	0	0	0	1	1	0	200	0	1	0	0
12181540	26739791	30186883	67	0	0	0	0	0	0	37	110	25	95	59	7	7	3	3	0	1	1	1	0	1	0	8	1	6942	6942	6942	6942	96	85	129	18	18	1	1	1	1	1	1	2	1	2000	0	0	0	0
11135229	27777880	30190164	53	0	0	0	0	1	1	37	97	16	97	71	6	12	2	1	1	1	0	0		0	0	2	1	2907	2907	2907	2907	96	81	125	6	1	0	0	0	0	0	0	2	1	2000	0	0	0	0
18712508	27293200	30195650	69	0	1	0	0	1	0	38	49	22	100	65	6	8	2	1	0	1	0	0		0	0	2	1	191	191	191	191	179	28	233	13	6	0	0	0	0	0	1	1	0	200	0	1	0	0
19127072	27460664	30203798	67	0	0	0	0	0	0	39	95	25	100	92	9	15	1	2	1	1	1	1	0	0	0	5	1	767	767	767	767	127	18	165	18	18	0	0	0	0	0	1	2	1	600	0	0	0	1
18956189	27609554	30205333	86	0	0	0	0	0	0	36	87	13	86	80	25	8	4	3	1	1	0	0		0	0	3	1	2463	2463	2463	2463	89	31	116	6	6	1	1	1	1	1	1	2	1	2000	0	0	0	0
12739131	21149710	30207021	59	0	0	0	0	0	1	37	98	23	100	62	21	9	0	1	1	1	1	0	0	1	0	4	1	305	305	305	305	127	29	165	17	16	0	0	0	0	1	1	2	1	400	0	0	1	0
11422531	28125137	30208984	47	0	0	0	0	0	0	36	68	11	97	64	7	10	2	4	1	1	1	0	1	0	0	9	1	149	149	149	149	169	33	220	5	1	0	0	0	0	0	1	1	0	200	0	1	0	0
14020287	26820323	30214611	54	0	0	0	0	0	1	37	67	18	100	66	5	8	3	2	1	1	0	0		0	0	3	1	392	392	392	392	143	180	186	17	4	1	1	0	0	0	1	2	1	400	0	0	1	0
15925315	27833368	30223320	53	1	0	1	0	0	0	36	108	22	100	62	9	8	1	1	1	1	1	0	0	0	1	4	1	722	722	722	722	178	22	231	9	9	0	0	0	0	1	1	2	1	600	0	0	0	1
14882082	24217071	30227709	54	0	0	1	0	0	1	36	67	18	100	64	17	12	1	1	0	1	0	0		0	0	5	1	1067	1067	1067	1067	112	54	146	10	2	0	0	0	0	0	0	2	1	1000	0	0	0	0
14996995	28442302	30227825	91	0	1	0	0	0	1	36	75	19	93	94	8	8	1	2	0	0	0	0		0	0	4	1	137	137	137	137	241	111	313	6	3	1	1	0	0	0	0	1	0	200	0	1	0	0
13024370	22221315	30229039	67	0	0	0	0	0	0	37	92	16	100	69	12	7	2	2	0	1	0	0		0	0	6	1	250	250	250	250	104	123	135	6	2	0	0	0	0	0	0	1	0	200	0	1	0	0
15418295	27787772	30230214	57	0	0	0	0	1	0	37	76	15	100	105	9	9	3	1	0	1	0	0		0	0	2	1	510	510	510	510	172	41	224	7	4	0	0	0	0	0	1	2	1	400	0	0	1	0
12972444	26536974	30239744	70	0	1	0	1	0	1	37	60	16	100	59	10	14	1	2	0	1	1	1	0	0	0	2	1	646	646	646	646	144	24	187	13	6	0	0	0	0	0	1	2	1	600	0	0	0	1
18461025	23155418	30240654	75	0	1	1	1	0	0	39	100	24	100	67	26	9	1	2	1	1	0	0		0	0	2	1	127	127	127	127	204	59	265	1	1	1	1	1	1	1	1	1	0	200	0	1	0	0
10984108	28503629	30243071	71	0	1	0	1	0	1	37	80	23	99	121	10	12	1	1	0	1	0	0		0	0	2	1	118	118	118	118	221	24	287	17	5	0	0	0	0	1	1	1	0	200	0	1	0	0
19970491	25338284	30244200	55	1	0	0	0	0	0	36	66	15	99	68	14	12	1	1	0	1	1	1	0	0	1	6	1	634	634	634	634	78	13	101	133	47	0	0	0	0	1	1	2	1	600	0	0	0	1
11135350	20633855	30244977	84	1	1	1	0	0	1	37	85	16	100	73	8	8	1	1	1	1	0	0		0	0	2	1	177	177	177	177	168	26	218	20	20	0	0	0	0	0	1	2	1	400	0	0	1	0
11123887	25222193	30247197	32	1	0	0	0	0	1	37	109	18	100	75	8	8	1	4	1	0	1	1	1	0	0	4	1	405	405	405	405	112	136	146	51	2	0	0	0	0	1	1	2	1	400	0	0	1	0
17259664	23876596	30251822	80	0	0	0	0	1	1	36	89	21	100	74	40	10	6	2	1	1	0	0		0	0	4	1	3951	3951	3951	3951	126	47	166	12	9	0	0	0	0	1	1	2	1	2000	0	0	0	0
14257483	26691465	30252483	38	0	0	0	0	1	1	36	108	16	100	71	30	8	2	2	0	1	0	0		0	0	6	1	1760	1760	1760	1760	99	59	132	18	18	1	1	1	1	1	1	2	1	1600	0	0	0	0
17414351	23018977	30254621	38	0	0	0	0	0	1	36	83	35	94	73	28	10	2	1	0	1	0	0		0	0	8	1	1509	1509	1509	1509	68	36	88	112	34	0	0	0	0	1	1	2	1	1400	0	0	0	0
15077560	25838308	30261078	67	1	0	0	0	0	1	35	114	20	91	48	12	9	2	4	1	0	1	1	0	0	0	11	1	1850	2527	1850	2189	62	83	81	25	14	1	1	1	1	1	1	2	1	1800	0	0	0	0
11235565	20051137	30261719	87	0	0	0	1	1	1	37	76	9	96	73	6	8	2	2	1	1	0	0		0	0	5	1	155	155	155	155	163	73	212	2	1	0	0	0	0	1	0	2	1	400	0	0	1	0
14973395	26267783	30262829	64	0	0	0	0	0	1	37	105	16	100	70	16	13	2	3	1	1	0	0		0	0	6	1	2778	2778	2778	2778	107	126	139	7	7	1	1	0	0	0	1	2	1	2000	0	0	0	0
18845236	23810069	30264363	51	0	1	1	1	1	1	36	90	19	98	68	31	10	4	3	1	1	1	1	0	0	0	4	1	2878	2878	2878	2878	187	37	243	7	3	1	1	1	0	0	1	2	1	2000	0	0	0	0
10533970	26714622	30268000	89	1	0	0	0	0	1	37	82	26	99	60	15	9	1	2	1	1	0	0		0	0	2	1	261	261	261	261	153	24	199	11	1	1	1	1	0	0	0	2	1	400	0	0	1	0
10923555	20732458	30268845	56	0	0	1	0	1	1	37	111	16	100	97	9	8	3	2	0	1	0	0		0	0	2	1	88	88	88	88	137	41	178	3	2	0	0	0	0	0	1	1	0	200	0	1	0	0
14992846	27193595	30271468	92	0	1	0	1	1	1	36	67	18	98	66	11	10	1	2	0	0	0	0		0	0	5	1	114	114	114	114	248	63	322	13	10	0	1	0	0	0	1	1	0	200	0	1	0	0
10246901	25432788	30272416	52	0	0	1	0	0	1	37	101	21	99	88	7	7	2	3	0	1	1	0	1	0	0	10	1	31494	31494	31494	31494	81	130	105	45	21	0	0	0	0	1	1	2	1	2000	0	0	0	0
16473918	22460927	30278082	59	0	0	0	0	0	1	37	92	13	96	79	7	12	1	1	0	1	1	0	0	0	1	3	1	199	199	199	199	207	23	269	4	2	0	0	0	0	0	0	1	0	200	0	1	0	0
10670888	21409707	30279527	29	0	0	0	0	0	1	37	80	29	97	77	23	16	3	3	0	1	0	0		0	0	9	1	738	738	738	738	139	27	181	19	9	0	0	0	0	1	1	2	1	600	0	0	0	1
12502728	27786970	30283522	56	0	0	0	0	0	0	37	86	19	94	67	12	7	3	4	0	1	0	0		0	0	3	1	881	881	881	881	137	22	178	15	7	0	0	0	0	0	1	2	1	800	0	0	0	0
18945171	26469866	30285446	68	1	0	0	1	0	1	37	95	13	94	61	18	7	1	1	1	1	1	1	1	0	0	4	1	669	669	669	669	114	13	148	24	16	0	0	0	0	0	1	2	1	600	0	0	0	1
18787376	23748182	30302118	83	0	1	0	0	0	1	38	79	34	99	85	8	9	0	1	0	1	1	0	1	1	0	5	1	425	425	425	425	94	15	122	18	9	1	1	1	1	1	1	2	1	400	0	0	1	0
10976647	29833305	30310776	77	0	0	1	0	1	1	37	92	23	90	79	11	13	1	2	0	0	0	0		0	0	2	1	305	305	305	305	235	14	306	3	2	0	0	0	0	0	0	1	0	200	0	1	0	0
13768283	24256812	30318983	57	1	0	0	0	0	1	38	124	17	98	83	34	9	1	2	1	1	0	0		0	0	2	1	2971	2971	2971	2971	141	61	186	22	5	0	0	0	0	0	1	2	1	2000	0	0	0	0
12650542	24578982	30322840	94	1	0	0	0	0	1	37	64	24	97	60	8	8	1	1	1	1	0	0		0	0	2	1	67	67	67	67	238	17	309	3	1	0	0	0	0	0	0	1	0	200	0	1	0	0
11549427	26652666	30324860	30	0	0	0	0	0	1	38	109	33	93	68	17	10	1	3	1	1	0	0		0	0	3	1	116	116	116	116	229	8	298	11	8	0	0	0	0	0	0	1	0	200	0	1	0	0
11596570	20840530	30326687	58	0	1	0	0	0	1	37	65	22	99	79	15	9	1	2	1	1	1	0	0	0	1	5	1	722	722	722	722	177	59	233	6	6	1	1	1	1	0	1	2	1	600	0	0	0	1
19989918	22474537	30333293	51	0	0	0	0	0	0	37	74	20	98	98	11	12	1	1	0	1	0	0		0	0	2	1	32	32	32	32	246	101	320	8	3	0	0	0	0	0	1	1	0	200	0	1	0	0
10358003	21609634	30336108	52	0	0	0	0	0	1	37	81	31	100	66	12	7	0	2	1	1	1	1	1	0	1	4	1	161	161	161	161	62	56	81	37	1	0	1	1	0	0	0	2	1	400	0	0	1	0
13871299	23339729	30340276	61	0	1	0	0	1	0	37	112	35	97	93	13	13	3	3	0	1	0	0		0	0	3	1	442	442	442	442	207	28	269	6	1	0	0	0	0	0	0	2	1	400	0	0	1	0
17290356	25108939	30341934	25	0	0	0	0	0	1	39	88	18	100	77	4	13	1	1	0	1	0	0		0	0	2	1	171	171	171	171	161	60	209	4	2	0	0	0	0	0	0	1	0	200	0	1	0	0
12601466	26212515	30342152	84	1	0	0	0	0	0	36	50	24	98	78	2	10	1	3	1	1	0	0		0	0	2	1	1283	1283	1283	1283	155	74	202	14	4	0	0	0	0	0	0	2	1	1200	0	0	0	0
11328386	28869489	30342613	81	0	1	0	0	1	1	37	93	15	100	71	8	8	2	2	1	1	1	0	0	0	1	8	1	822	822	822	822	95	17	124	14	5	1	1	1	0	0	1	2	1	800	0	0	0	0
18348137	26997189	30343476	93	0	1	1	0	0	1	37	96	22	99	73	14	6	1	3	1	1	0	0		0	0	2	1	16	16	16	16	254	24	330	3	1	0	1	0	0	0	0	1	0	200	0	1	0	0
19443466	24929641	30345531	67	0	1	1	1	0	1	36	65	23	95	61	20	11	1	2	1	1	1	1	1	0	1	8	1	1731	1968	1731	1816	164	56	210	41	36	0	1	1	1	0	1	2	1	1600	0	0	0	0
18367977	26256814	30347748	72	0	1	1	0	0	1	37	73	31	98	64	30	9	1	2	1	1	1	0	0	1	0	3	1	1033	1033	1033	1033	119	10	155	13	8	0	0	0	0	0	1	2	1	1000	0	0	0	0
16460117	24898153	30348220	87	1	0	1	0	0	1	37	122	14	97	107	7	12	1	3	1	1	0	0		0	0	2	1	66	66	66	66	219	99	285	4	2	0	0	0	0	0	0	1	0	200	0	1	0	0
19036639	23424336	30354179	22	0	0	0	0	0	0	39	96	23	100	56	23	7	1	1	1	1	0	0		0	0	7	1	9717	9717	9717	9717	74	36	96	10	5	0	0	0	0	1	0	2	1	2000	0	0	0	0
15954199	27704576	30357145	64	0	1	1	0	1	1	37	140	25	93	55	19	9	1	3	0	0	1	0	0	1	0	3	1	12653	12653	12653	12653	98	130	127	40	2	0	0	0	0	0	0	2	1	2000	0	0	0	0
16211926	24387056	30357415	76	1	0	1	0	0	0	37	104	21	99	96	7	10	1	1	0	1	0	0		0	0	4	1	168	168	168	168	140	74	182	12	6	0	0	0	0	0	0	1	0	200	0	1	0	0
18334240	27815711	30366585	74	1	0	1	0	0	0	37	65	18	97	59	2	9	1	3	0	1	0	0		0	0	4	1	4386	4386	4386	4386	218	42	283	15	5	1	1	1	0	0	1	2	1	2000	0	0	0	0
15575136	22706972	30377071	45	1	0	0	0	0	0	37	140	33	100	79	20	9	3	2	1	0	1	1	0	0	0	5	1	69	69	69	69	177	16	230	19	6	1	1	1	0	0	1	1	0	200	0	1	0	0
10474526	21021060	30384015	19	0	0	0	0	0	0	39	86	20	96	77	6	10	1	1	1	0	0	0		0	0	4	1	5477	5839	2377	4564	100	24	130	6	3	0	0	0	0	1	1	2	1	2000	0	0	0	0
14706623	23172713	30387219	71	1	1	0	1	0	1	37	79	15	100	97	12	7	1	1	1	0	1	0	1	0	0	2	1	26	26	26	26	235	20	306	33	33	0	0	0	0	0	1	1	0	200	0	1	0	0
19532004	28557353	30391518	51	1	0	0	0	0	1	38	118	22	92	80	18	11	1	1	0	0	1	1	0	0	0	3	1	159	159	159	159	243	14	316	43	43	0	0	0	0	0	1	1	0	200	0	1	0	0
11048724	27947904	30407667	86	0	0	0	1	1	1	37	93	24	95	80	17	10	5	1	0	1	0	0		0	0	5	1	1508	1508	1508	1508	126	44	164	3	3	0	0	0	0	0	1	2	1	1400	0	0	0	0
16153944	26252359	30408520	64	0	0	0	0	0	1	36	107	14	94	48	5	7	1	1	1	1	0	0		0	0	2	1	1911	1911	1911	1911	57	27	74	7	3	0	1	0	0	1	1	2	1	1800	0	0	0	0
13795994	20329785	30412387	63	0	0	0	0	0	1	36	74	24	100	72	27	10	1	2	1	1	1	0	1	0	0	3	1	1239	1239	1239	1239	61	76	79	16	3	0	0	0	0	1	1	2	1	1200	0	0	0	0
19871031	26695796	30420855	84	0	1	0	0	0	1	37	73	19	98	68	9	9	1	2	1	1	1	0	0	0	1	4	1	580	580	580	580	176	17	229	11	5	0	1	0	0	0	1	2	1	400	0	0	1	0
10208557	24687318	30431175	81	0	0	0	0	1	0	36	58	25	96	67	7	10	1	1	0	1	0	0		0	0	3	1	221	221	221	221	163	153	212	10	4	0	0	0	0	0	1	1	0	200	0	1	0	0
18258848	27535767	30431561	53	1	0	0	0	0	1	37	110	29	95	98	22	9	1	1	0	1	1	1	0	0	0	2	1	2204	2204	2204	2204	78	18	101	43	20	0	0	0	0	0	1	2	1	2000	0	0	0	0
15890344	29195619	30436278	56	0	0	0	0	0	0	38	128	17	95	72	40	13	4	3	0	1	1	0	0	1	0	4	1	389	389	389	389	128	61	166	3	4	1	1	1	1	1	1	1	0	200	0	1	0	0
10600153	28179068	30443314	48	0	0	0	0	0	1	36	80	15	100	61	12	10	1	3	0	1	0	0		0	0	2	1	1803	1803	1803	1803	145	55	189	25	14	0	0	0	0	1	1	2	1	1800	0	0	0	0
13948726	28522504	30448148	58	1	0	1	0	0	1	37	117	32	92	56	11	10	1	2	1	0	1	0	0	0	1	6	1	103	103	103	103	121	14	157	18	11	0	0	0	0	1	1	1	0	200	0	1	0	0
19299113	29947543	30452400	68	0	0	0	0	0	0	37	102	28	97	72	13	11	1	2	1	1	1	1	0	0	0	4	1	332	472	332	408	140	77	182	18	17	0	0	0	0	1	0	2	1	400	0	0	1	0
11456246	25725408	30452860	54	0	0	0	0	0	0	37	117	34	96	67	17	10	1	2	1	0	0	0		0	0	4	1	354	354	354	354	147	8	191	11	1	0	0	0	0	1	0	2	1	400	0	0	1	0
11751250	27954417	30455080	56	0	1	1	1	0	1	37	85	23	100	94	34	10	1	3	0	1	1	0	0	1	0	4	1	575	575	575	575	165	12	211	23	20	1	1	1	1	1	1	2	1	400	0	0	1	0
18257036	28699245	30455873	77	1	0	0	1	0	0	36	69	26	92	103	25	10	1	2	0	1	0	0		0	0	3	1	821	821	821	821	196	22	255	2	2	1	1	0	0	0	0	2	1	800	0	0	0	0
19532128	20241914	30465279	33	0	0	0	0	0	0	38	95	25	90	64	5	11	1	1	0	0	0	0		0	0	6	1	4255	4255	4255	4255	133	40	173	25	15	0	0	0	0	0	1	2	1	2000	0	0	0	0
18974737	27571058	30473900	80	1	0	0	0	0	0	37	98	18	99	68	7	10	1	2	0	1	0	0		0	0	2	1	4529	4529	4529	4529	95	53	124	7	5	1	1	0	0	0	1	2	1	2000	0	0	0	0
17766495	24016089	30478260	62	0	0	1	1	1	1	37	71	12	100	71	11	8	2	1	0	1	0	0		0	0	4	1	349	349	349	349	156	22	203	1	1	0	0	0	0	0	0	1	0	200	0	1	0	0
12834264	20933790	30479204	55	0	0	0	0	0	1	38	116	16	100	99	17	7	1	2	0	1	0	0		0	0	6	1	5270	5270	5270	5270	180	69	234	4	4	1	1	1	1	1	1	2	1	2000	0	0	0	0
14936398	23653594	30487368	75	0	0	0	0	0	1	37	54	14	96	67	11	9	1	1	0	1	0	0		0	0	5	1	410	410	410	410	173	19	225	10	10	0	0	0	0	0	1	2	1	400	0	0	1	0
12828636	23558523	30495523	32	1	0	0	0	0	1	37	112	27	94	73	20	11	8	2	0	1	1	0	1	1	0	9	1	2125	2125	2125	2125	126	12	164	3	3	0	0	0	0	1	1	2	1	2000	0	0	0	0
18974079	27761005	30499847	85	0	0	1	0	1	1	37	74	17	87	90	10	8	2	1	0	1	0	0		0	0	2	1	159	159	159	159	202	25	263	11	6	1	1	1	0	0	0	1	0	200	0	1	0	0
12047418	26209240	30502861	29	0	0	0	0	0	1	37	126	20	95	111	11	11	0	1	0	1	1	1	0	0	0	4	1	323	323	323	323	137	15	178	21	21	0	0	0	0	0	1	1	0	200	0	1	0	0
18213765	28157956	30503228	67	0	0	0	0	0	0	39	127	28	99	73	2	8	4	1	0	1	0	0		0	0	7	1	20036	20764	5377	15592	124	43	131	16	7	0	0	0	0	0	0	2	1	2000	0	0	0	0
12161387	27204360	30506256	52	1	0	0	0	0	1	37	111	11	95	66	14	10	2	3	1	1	0	0		0	0	4	1	5696	5696	5696	5696	183	166	238	41	19	0	0	0	0	1	1	2	1	2000	0	0	0	0
16311268	26779282	30522716	55	0	0	0	0	0	0	36	70	13	99	65	21	8	3	1	1	1	0	0		0	0	3	1	272	272	272	272	128	41	166	21	6	0	0	0	0	0	1	2	1	400	0	0	1	0
13557562	27642048	30527208	83	1	0	0	0	0	1	38	128	26	100	84	13	7	2	2	0	0	0	0		0	0	3	1	346	346	346	346	93	11	121	2	2	0	0	0	0	1	0	1	0	200	0	1	0	0
17810811	25877275	30529254	62	0	0	1	0	1	1	37	111	24	96	88	12	7	3	3	0	1	1	0	1	0	0	4	1	51	51	51	51	210	242	273	53	9	0	0	0	0	1	1	1	0	200	0	1	0	0
11509670	24824123	30532230	89	0	1	1	1	1	1	37	60	14	100	75	20	10	4	2	0	1	0	0		0	0	4	1	503	503	503	503	164	45	209	14	3	1	1	1	0	0	1	2	1	400	0	0	1	0
11985436	22717922	30538065	58	0	1	0	0	0	1	37	85	16	95	56	9	7	1	2	1	1	0	0		0	0	12	1	112	112	112	112	111	84	144	28	17	0	0	0	0	1	1	1	0	200	0	1	0	0
14823424	27463378	30542642	78	0	0	0	0	1	1	37	49	15	94	80	9	9	1	1	0	0	0	0		0	0	2	1	930	930	930	930	129	26	168	8	5	0	0	0	0	0	0	2	1	800	0	0	0	0
14239129	24218277	30545486	61	0	0	0	0	0	0	37	96	21	98	67	1	10	1	2	1	1	0	0		0	0	2	1	1919	1919	1919	1919	131	110	170	11	4	1	1	1	0	1	1	2	1	1800	0	0	0	0
19049498	24463527	30558035	74	0	0	1	1	1	0	37	80	21	98	74	14	7	3	1	0	1	0	0		0	0	5	1	1730	1730	1730	1730	218	146	283	75	8	0	1	1	0	0	1	2	1	1600	0	0	0	0
19542699	21893553	30559524	86	0	1	0	0	0	1	38	101	28	94	78	7	16	2	4	0	1	0	0		0	0	9	1	722	722	722	722	114	31	148	22	9	0	0	0	0	1	1	2	1	600	0	0	0	1
17831708	29754293	30562113	57	1	0	0	0	0	0	37	73	22	99	78	14	12	1	2	1	1	1	1	0	0	0	3	1	268	268	268	268	174	17	226	10	12	1	1	1	1	1	1	2	1	400	0	0	1	0
17694075	23867519	30564998	67	1	0	0	1	0	1	38	99	20	95	63	13	11	1	3	1	1	1	0	1	0	0	9	1	728	728	728	728	84	47	194	49	45	0	0	0	0	1	1	2	1	600	0	0	0	1
14033558	27137840	30567089	92	1	0	0	1	0	1	38	66	12	100	79	11	11	1	2	1	1	0	0		0	0	2	1	111	111	111	111	198	34	257	8	8	1	1	1	1	0	1	1	0	200	0	1	0	0
19343087	27945815	30571610	44	1	0	1	0	0	1	37	85	19	94	86	13	10	1	1	0	1	0	0		0	0	2	1	273	273	273	273	167	22	217	16	6	0	0	0	0	0	1	1	0	200	0	1	0	0
15638214	29535876	30575724	68	0	0	0	0	0	0	37	95	27	97	44	3	10	1	2	0	1	0	0		0	0	2	1	69	69	69	69	149	65	195	4	1	0	0	0	0	0	1	1	0	200	0	1	0	0
10819468	25785127	30579374	44	0	0	0	0	0	0	36	90	19	98	65	24	10	1	3	0	1	0	0		0	0	8	1	163	163	163	163	140	94	184	16	2	0	0	0	0	0	1	1	0	200	0	1	0	0
15021356	21207633	30579992	28	0	0	0	0	0	1	37	76	14	99	74	7	10	1	1	0	1	0	0		0	0	4	1	19	19	19	19	252	86	328	7	2	0	0	0	0	1	0	0	0	0	1	0	0	0
11097256	28087776	30585358	69	1	0	1	0	0	1	37	79	14	100	67	12	10	1	1	1	1	1	0	1	1	0	3	1	647	647	647	647	174	60	226	72	39	0	0	0	0	0	1	2	1	600	0	0	0	1
16661755	22250253	30586760	72	0	1	1	1	1	1	37	72	13	99	54	5	9	1	1	1	0	0	0		0	0	3	1	214	214	214	214	165	37	215	7	4	0	0	0	0	0	1	2	1	400	0	0	1	0
19211213	21327073	30588516	62	1	0	0	1	0	1	37	76	12	100	91	12	10	1	3	0	1	0	0		0	0	4	1	417	417	417	417	170	35	221	11	6	0	0	0	0	0	1	2	1	400	0	0	1	0
15765403	24210059	30591798	59	0	0	1	0	1	0	36	97	16	93	50	10	11	3	4	1	0	0	0		0	0	4	1	258	258	258	258	122	30	182	28	26	0	0	0	0	0	1	2	1	400	0	0	1	0
19198743	27918992	30595022	76	0	1	1	0	1	0	36	58	22	95	69	14	10	2	2	1	0	0	0		0	0	4	1	3100	3100	3100	3100	117	43	152	15	10	0	1	0	0	0	1	2	1	2000	0	0	0	0
13055132	29015949	30595287	32	0	0	0	0	0	1	38	101	15	99	69	20	9	1	1	0	1	0	0		0	0	6	1	50	50	50	50	165	66	215	12	5	0	0	0	0	0	1	1	0	200	0	1	0	0
11049412	21646090	30596175	38	0	0	0	0	0	1	37	110	19	99	83	10	9	1	3	1	0	1	0	1	0	0	4	1	72	72	60	66	208	29	242	25	17	0	0	0	0	0	1	1	0	200	0	1	0	0
14919291	22005731	30598439	60	0	1	1	0	0	1	38	106	27	98	89	9	7	1	1	1	1	1	0	1	0	1	9	1	556	556	556	556	95	17	124	15	9	0	0	0	0	0	1	2	1	400	0	0	1	0
19960115	28341607	30600396	71	1	0	1	0	0	1	39	140	37	96	73	24	12	2	3	0	0	1	1	0	0	1	2	1	452	584	452	518	106	22	138	31	25	0	0	0	0	1	1	2	1	400	0	0	1	0
14760338	22420207	30608050	81	1	1	1	1	0	1	37	91	18	95	69	10	8	1	1	0	1	0	0		0	0	2	1	284	284	284	284	171	22	222	11	12	1	1	1	1	0	1	1	0	200	0	1	0	0
13037175	22773411	30609246	76	0	0	0	0	0	1	37	71	20	100	56	13	10	2	1	1	1	0	0		0	0	6	1	197	197	197	197	190	55	247	4	2	1	1	1	0	1	1	2	1	400	0	0	1	0
15024484	22653100	30616549	61	0	0	1	0	0	0	36	140	19	98	65	11	13	1	3	0	1	0	0		0	0	2	1	583	583	583	583	74	88	96	10	5	0	0	0	0	0	1	2	1	400	0	0	1	0
14414013	24482254	30616774	30	0	0	0	0	0	1	37	85	24	100	64	17	10	1	1	1	1	0	0		0	0	9	1	778	778	778	778	157	58	204	5	5	0	0	0	0	1	1	2	1	600	0	0	0	1
15551751	24705411	30635095	80	0	0	1	0	0	1	38	72	16	94	81	7	12	1	1	1	1	0	0		0	0	3	1	233	233	233	233	131	31	170	17	17	0	0	0	0	1	1	2	1	400	0	0	1	0
11281127	29749314	30635726	53	1	1	0	0	0	1	36	91	19	99	70	15	8	2	1	0	1	0	0		0	0	3	1	466	466	466	466	133	50	173	21	10	0	0	0	0	1	1	2	1	400	0	0	1	0
18749064	28831703	30636089	56	0	1	0	0	0	0	36	138	20	90	109	19	16	7	3	0	1	0	0		0	0	5	1	3975	3975	3975	3975	119	31	155	8	5	0	0	0	0	1	1	2	1	2000	0	0	0	0
17410025	26941789	30645946	40	1	1	0	0	0	0	37	69	22	92	47	15	13	1	1	1	0	1	1	1	0	0	5	1	355	355	355	355	204	30	265	49	49	0	1	0	0	0	1	2	1	400	0	0	1	0
10898129	26259218	30649699	80	0	1	1	1	1	1	37	71	25	94	82	8	12	6	4	0	1	0	0		0	0	6	1	1527	1527	1527	1527	90	81	117	6	3	1	1	1	0	0	1	2	1	1400	0	0	0	0
15831124	22253579	30651352	66	1	0	1	1	0	1	36	100	18	100	66	5	12	1	4	1	1	0	0		0	0	2	1	1026	1026	1026	1026	77	20	100	29	29	0	1	1	1	1	1	2	1	1000	0	0	0	0
14971759	20103258	30654663	59	1	0	0	0	0	0	36	89	12	97	78	4	10	1	2	0	1	0	0		0	0	3	1	1042	1042	1042	1042	144	175	187	2	2	1	1	0	0	0	0	2	1	1000	0	0	0	0
10480050	28487272	30656184	41	1	0	0	0	0	0	37	89	16	96	94	15	12	1	1	1	1	1	0	1	0	0	2	1	792	792	792	792	183	214	238	7	3	0	0	0	0	0	1	2	1	600	0	0	0	1
16256635	23251044	30659236	82	1	0	0	0	0	0	37	86	29	97	68	15	11	1	2	0	1	0	0		0	0	2	1	1796	1796	1796	1796	123	10	160	8	3	0	0	0	0	0	1	2	1	1600	0	0	0	0
18833621	29632425	30665877	69	0	0	1	0	1	1	35	69	20	100	72	6	7	5	2	1	1	1	0	0	0	0	7	1	926	926	926	926	79	25	103	33	17	0	1	0	0	1	1	2	1	800	0	0	0	0
17521563	28327024	30675827	68	0	1	1	0	1	1	37	81	11	100	70	10	9	2	2	1	1	0	0		0	0	4	1	89	89	89	89	137	30	178	21	5	0	0	0	0	0	1	1	0	200	0	1	0	0
15727523	25569399	30679031	54	0	0	0	0	1	1	37	109	24	96	95	28	8	7	1	1	1	0	0		0	0	4	1	227	227	227	227	168	25	218	16	7	0	0	0	0	0	1	2	1	400	0	0	1	0
17520318	23431795	30682249	79	1	1	0	1	0	1	35	87	17	100	50	27	13	1	3	1	1	1	1	0	0	0	2	1	3267	3267	3267	3267	163	43	215	20	18	1	1	1	1	1	1	2	1	2000	0	0	0	0
17460373	29840676	30683550	62	0	0	0	0	0	0	36	84	11	97	44	7	8	1	1	1	1	0	0		0	0	2	1	72	72	72	72	215	30	280	11	4	0	0	0	0	1	0	1	0	200	0	1	0	0
17373919	27627470	30690174	40	0	1	0	0	1	1	37	87	12	100	109	9	6	8	1	0	1	0	0		0	0	4	1	54	54	54	54	224	18	291	6	3	0	0	0	0	0	1	1	0	200	0	1	0	0
12821811	24576685	30695845	80	1	0	1	0	0	1	38	115	26	92	99	11	12	1	2	0	0	1	1	0	0	0	2	1	123	123	123	123	228	66	296	44	44	0	0	0	0	0	1	1	0	200	0	1	0	0
13339621	23406363	30698281	82	0	1	0	0	1	0	37	64	22	96	72	7	9	1	1	1	1	0	0		0	0	2	1	121	121	121	121	186	51	242	6	2	0	0	0	0	0	0	1	0	200	0	1	0	0
17846379	28308556	30698945	64	0	1	0	0	0	0	37	91	16	93	61	2	6	1	1	0	1	0	0		0	0	7	1	1313	1313	584	949	133	14	173	16	11	0	1	0	0	0	1	2	1	1200	0	0	0	0
13073377	28608703	30704519	53	0	0	0	0	1	1	37	79	19	95	53	8	8	4	1	1	0	0	0		0	0	4	1	2443	3170	828	1929	102	18	133	17	10	0	0	0	0	0	1	2	1	2000	0	0	0	0
17744715	25506444	30717105	35	0	0	0	0	0	1	38	118	26	100	61	15	10	2	3	0	1	0	0		0	0	4	1	1731	1731	1731	1731	110	66	146	27	10	0	0	0	0	1	1	2	1	1600	0	0	0	0
12974332	25845436	30720284	67	1	0	0	0	0	1	37	110	20	98	95	11	11	1	3	0	1	1	0	1	0	0	2	1	1181	1181	1181	1181	142	22	185	25	13	0	0	0	0	0	1	2	1	1000	0	0	0	0
11668452	21400255	30721263	77	1	1	1	0	0	1	37	69	23	99	52	12	10	3	1	0	1	1	0	0	0	1	3	1	750	750	750	750	110	20	143	18	18	1	1	1	1	0	1	2	1	600	0	0	0	1
11593067	23236243	30730209	22	0	0	0	0	0	1	38	113	15	93	74	40	6	1	2	1	1	1	0	1	0	0	4	1	955	955	955	955	184	227	239	38	3	0	0	0	0	0	0	2	1	800	0	0	0	0
10691194	25809823	30731222	75	0	1	1	1	1	1	37	54	16	97	59	9	10	2	1	1	1	1	0	1	1	1	3	1	95	95	95	95	189	8	246	31	10	0	0	0	0	1	1	1	0	200	0	1	0	0
16387187	26857526	30732138	83	1	1	0	0	0	1	36	105	17	96	90	12	8	2	1	1	1	1	0	1	0	0	3	1	238	238	238	238	150	45	195	23	23	0	1	0	0	0	1	2	1	400	0	0	1	0
12054856	23213346	30732485	62	0	0	1	0	0	1	37	80	20	99	76	8	7	1	2	0	1	1	0	1	0	0	2	1	81	81	81	81	289	23	376	12	1	0	0	0	0	0	0	1	0	200	0	1	0	0
16731711	23567649	30732775	79	0	1	0	1	1	0	36	79	26	100	68	13	14	2	3	0	1	0	0		0	0	6	1	167	167	167	167	217	22	282	14	12	1	1	1	0	1	1	1	0	200	0	1	0	0
16423390	22555943	30742542	72	0	1	0	0	0	1	34	52	22	86	78	15	11	1	2	1	1	1	0	1	0	0	2	1	585	740	585	663	184	85	239	24	24	1	1	1	1	0	1	2	1	400	0	0	1	0
18959155	20124096	30746447	23	0	0	0	0	0	1	39	97	18	100	72	11	8	1	2	1	1	0	0		0	0	5	1	398	398	398	398	169	34	220	8	7	0	0	0	0	0	1	2	1	400	0	0	1	0
13962855	24639924	30748451	52	1	0	0	0	0	0	36	114	24	100	57	34	9	2	4	1	1	1	1	0	0	0	9	1	361	361	361	361	121	58	157	11	11	1	1	1	1	1	1	2	1	400	0	0	1	0
18028999	27403603	30755387	62	1	0	0	0	0	1	36	80	13	95	55	31	9	1	4	1	1	0	0		0	0	4	1	2492	2492	2492	2492	77	50	100	9	2	1	1	1	0	1	1	2	1	2000	0	0	0	0
15443439	22088878	30756275	78	1	0	1	0	0	1	37	74	20	99	46	5	8	3	4	1	0	1	1	1	0	0	8	1	556	556	334	416	111	18	144	50	39	0	1	0	0	1	1	2	1	400	0	0	1	0
14948197	23347432	30765964	80	0	0	0	0	1	1	37	117	36	98	63	34	9	5	2	0	1	0	0		0	0	4	1	7762	7762	7762	7762	106	39	138	2	1	1	1	1	1	1	1	2	1	2000	0	0	0	0
14129272	25375831	30770804	78	1	1	0	1	0	1	37	104	30	97	75	6	8	1	2	0	1	0	0		0	0	2	1	2001	2001	2001	2001	84	22	109	4	2	1	1	0	0	0	0	2	1	2000	0	0	0	0
10686831	23558919	30783439	56	0	0	0	0	1	1	37	110	13	99	83	9	8	5	2	1	1	0	0		0	0	3	1	1428	1428	1428	1428	133	133	173	15	15	0	0	0	0	0	1	2	1	1400	0	0	0	0
13842216	21447511	30787373	68	1	0	1	0	0	1	37	103	15	95	73	32	9	1	3	0	1	0	0		0	0	3	1	40	40	40	40	215	8	280	6	2	0	0	0	0	0	0	1	0	200	0	1	0	0
11013572	24572136	30791603	73	1	0	1	0	0	0	39	86	22	97	69	18	10	1	3	1	1	0	0		0	0	3	1	425	425	425	425	140	54	178	26	13	0	0	0	0	0	1	2	1	400	0	0	1	0
16254642	28315071	30801457	54	0	0	0	0	1	1	37	87	14	98	55	9	7	3	2	0	1	0	0		0	0	7	1	820	820	820	820	93	111	121	17	4	1	1	1	0	0	1	2	1	800	0	0	0	0
18033939	28640942	30804114	60	0	0	0	0	1	1	37	85	23	94	74	40	7	2	1	1	1	0	0		0	0	3	1	186	208	186	197	191	72	248	12	6	0	0	0	0	0	1	2	1	400	0	0	1	0
11877980	23336581	30812528	24	0	0	0	0	0	1	37	56	13	95	79	9	11	5	2	1	1	1	0	0	0	0	12	1	673	673	673	673	160	153	208	29	8	0	0	0	0	0	1	2	1	600	0	0	0	1
15991068	22801808	30813877	69	1	0	0	0	0	1	37	95	19	93	69	2	9	2	3	1	1	0	0		0	0	3	1	33281	39037	33281	35657	131	54	170	9	8	1	1	1	1	0	1	2	1	2000	0	0	0	0
10467385	24076139	30817068	61	0	0	0	0	0	1	37	106	22	96	63	8	9	1	1	0	1	0	0		0	0	3	1	555	555	555	555	98	33	127	17	11	0	0	0	0	0	1	2	1	400	0	0	1	0
15149227	27965624	30820506	28	1	0	0	0	0	0	37	110	37	97	107	12	12	1	2	1	1	1	1	1	1	1	4	1	255	255	255	255	104	25	135	145	96	0	0	0	0	0	1	2	1	400	0	0	1	0
19852548	23871885	30831080	49	0	0	0	0	0	1	36	59	23	97	72	3	8	1	2	0	1	0	0		0	0	3	1	1132	1132	1132	1132	139	34	181	6	1	0	0	0	0	1	0	2	1	1000	0	0	0	0
19895003	28467259	30833205	61	1	0	0	0	0	1	36	83	15	100	70	11	8	1	2	1	1	1	0	0	0	1	2	1	1684	1684	1529	1594	150	62	197	11	11	1	1	1	1	1	1	2	1	1600	0	0	0	0
18429092	27807332	30839062	66	0	1	1	0	1	1	37	106	21	98	51	10	8	2	1	0	1	1	0	1	0	0	4	1	106	106	106	106	246	35	320	23	23	0	0	0	0	1	1	1	0	200	0	1	0	0
14388050	28697432	30841844	76	0	1	1	0	1	1	39	101	21	99	82	9	9	3	1	1	1	0	0		0	0	3	1	120	120	120	120	190	14	247	4	2	0	0	0	0	0	0	1	0	200	0	1	0	0
10133608	27418107	30843576	90	1	0	0	0	0	1	37	66	23	98	68	8	11	1	1	1	1	0	0		0	0	3	1	35	35	35	35	211	29	274	11	1	0	0	0	0	0	0	1	0	200	0	1	0	0
15530925	29592482	30843874	43	0	0	0	0	1	1	37	98	25	95	67	29	10	6	1	0	1	1	0	0	0	1	2	1	1952	1952	1952	1952	150	28	195	25	14	0	0	0	0	1	1	2	1	1800	0	0	0	0
15682362	26804723	30844169	61	1	0	0	0	0	1	37	88	13	93	72	23	9	1	1	1	0	0	0		0	0	3	1	349	349	349	349	159	9	207	4	1	0	0	0	0	0	0	2	1	400	0	0	1	0
15746048	21739487	30845846	50	1	0	0	0	0	1	37	95	18	100	87	15	10	0	1	1	1	1	1	0	0	0	4	1	95	95	95	95	176	45	229	34	34	0	0	0	0	0	1	1	0	200	0	1	0	0
19645295	27049097	30849266	85	0	0	1	1	1	1	36	65	16	100	75	14	8	1	1	1	0	0	0		0	0	3	1	54	54	54	54	166	10	216	10	2	0	1	0	0	0	0	1	0	200	0	1	0	0
13697334	22354200	30858314	70	0	0	0	0	1	1	37	92	15	100	76	6	6	8	1	0	1	0	0		0	0	2	1	243	243	243	243	163	62	212	15	2	0	0	0	0	0	0	1	0	200	0	1	0	0
18268376	21982873	30861953	87	0	1	0	0	1	1	36	88	18	100	61	15	8	5	1	0	1	1	0	0	1	0	6	1	1565	1565	1565	1565	143	34	186	10	3	0	0	0	0	1	1	2	1	1400	0	0	0	0
16701292	28863676	30863055	82	0	0	1	0	0	0	36	80	19	100	85	4	10	1	1	0	1	0	0		0	0	4	1	676	676	676	676	169	151	220	6	4	0	1	0	0	1	1	2	1	600	0	0	0	1
11165802	29200981	30865290	30	0	0	0	0	0	1	37	80	17	98	63	7	9	1	4	0	1	0	0		0	0	5	1	3709	3709	3709	3709	154	81	201	14	6	0	0	0	0	1	1	2	1	2000	0	0	0	0
13464769	26552927	30868865	66	1	0	0	0	1	1	37	82	10	100	89	8	8	4	2	0	0	1	1	0	0	0	5	1	3726	3726	3726	3726	100	45	130	26	20	0	0	0	0	0	1	2	1	2000	0	0	0	0
16536431	28134913	30869806	33	0	0	0	0	0	1	37	105	11	100	66	18	7	1	1	1	0	0	0		0	0	4	1	514	514	514	514	137	75	178	7	2	0	0	0	0	0	0	2	1	400	0	0	1	0
18441942	26731051	30874552	67	0	0	1	0	0	0	38	54	21	98	89	7	10	1	1	0	1	1	1	1	0	0	4	1	199	199	103	151	179	35	208	38	38	0	1	0	0	0	1	1	0	200	0	1	0	0
14235312	20349273	30879168	63	1	0	0	0	0	1	38	90	20	99	68	11	8	1	1	1	1	1	0	1	0	1	3	1	260	260	260	260	138	22	179	20	10	0	0	0	0	0	1	2	1	400	0	0	1	0
11929406	21049875	30880683	38	0	0	0	0	0	0	37	89	31	93	70	13	8	4	2	1	1	1	0	0	1	0	9	1	899	899	899	899	133	81	175	5	5	1	1	1	1	0	1	2	1	800	0	0	0	0
19565716	23518469	30887451	87	1	0	0	0	0	1	37	138	20	95	72	17	10	1	2	1	1	0	0		0	0	5	1	2857	2857	2857	2857	126	142	164	4	3	0	1	0	0	0	1	2	1	2000	0	0	0	0
17060455	22413686	30889722	62	0	0	0	0	0	0	36	49	13	100	73	3	9	0	3	1	1	1	1	0	0	1	6	1	760	760	760	760	107	124	139	30	20	0	0	0	0	1	1	2	1	600	0	0	0	1
11218297	29892836	30894115	65	0	0	0	0	0	1	37	89	29	100	78	16	9	1	3	0	1	1	1	0	0	0	4	1	130	130	130	130	151	55	196	30	15	0	0	0	0	0	1	1	0	200	0	1	0	0
10678845	22766256	30894401	69	1	0	0	0	0	0	36	77	16	99	69	8	9	1	1	0	1	1	0	0	0	1	3	1	131	131	131	131	150	14	195	24	15	0	1	0	0	0	1	1	0	200	0	1	0	0
10308342	24888258	30896750	49	0	0	0	0	1	1	37	118	30	99	93	15	9	2	1	0	0	1	0	0	0	1	15	1	1445	1445	1445	1445	163	84	212	23	18	0	0	0	0	1	1	2	1	1400	0	0	0	0
17604215	28285933	30907727	35	0	0	0	0	0	1	35	103	24	86	79	21	11	1	1	1	1	1	1	0	0	0	4	1	520	520	520	520	55	6	72	31	14	0	0	0	0	1	1	2	1	400	0	0	1	0
10101360	25844417	30908128	36	0	0	0	0	0	0	38	134	24	93	72	5	8	1	2	0	1	0	0		0	0	6	1	34543	34543	33281	34543	140	74	183	8	2	0	0	0	0	0	0	2	1	2000	0	0	0	0
19834949	27411859	30913513	30	0	0	0	0	0	0	37	49	18	97	84	17	10	1	3	0	1	1	1	0	0	0	2	1	229	229	229	229	214	54	278	53	11	0	1	1	0	0	0	1	0	200	0	1	0	0
11653487	25043244	30916589	68	1	0	0	0	0	1	38	81	14	100	75	5	10	1	2	0	1	0	0		0	0	4	1	556	556	556	556	141	43	183	4	2	0	0	0	0	1	0	2	1	400	0	0	1	0
13500689	24081317	30918199	72	0	0	0	0	0	1	36	98	19	95	114	9	15	1	1	0	1	1	1	0	0	0	2	1	1199	1199	1199	1199	158	70	205	37	37	0	0	0	0	0	1	2	1	1000	0	0	0	0
13021440	28456315	30920975	83	0	0	1	0	1	1	37	89	24	100	60	11	8	3	3	1	1	1	1	0	1	1	4	1	1719	1719	1719	1719	134	69	174	31	18	0	1	1	0	1	1	2	1	1600	0	0	0	0
17198769	24317910	30924590	62	1	0	0	0	0	1	36	94	15	100	119	4	8	2	3	1	0	1	0	1	0	0	6	1	36963	41860	33281	35657	99	248	129	54	18	0	0	0	0	1	1	2	1	2000	0	0	0	0
17996876	25247883	30925357	69	0	0	1	0	0	0	37	68	18	96	66	11	12	1	2	1	1	0	0		0	0	2	1	142	142	142	142	152	33	198	24	20	0	0	0	0	0	1	1	0	200	0	1	0	0
10035631	29276678	30932571	67	0	0	0	0	0	1	37	116	13	98	66	19	9	1	2	0	0	0	0		0	0	3	1	33546	33546	33281	33546	125	56	165	13	11	1	1	1	0	1	1	2	1	2000	0	0	0	0
16320616	20980880	30940608	67	1	1	0	1	0	0	37	104	23	97	69	8	11	1	1	1	1	0	0		0	0	2	1	57	57	57	57	241	22	313	10	1	0	0	0	0	0	0	1	0	200	0	1	0	0
14399758	23942053	30945173	79	0	1	0	0	1	1	37	82	20	95	78	19	11	7	2	0	1	0	0		0	0	8	1	647	647	647	647	118	28	153	15	8	1	1	0	0	1	1	2	1	600	0	0	0	1
10170022	26174955	30946357	87	0	1	0	1	0	0	37	116	35	92	75	18	8	1	1	1	1	1	0	1	0	0	7	1	164	164	164	164	189	76	246	12	6	0	0	0	0	1	1	2	1	400	0	0	1	0
17428061	23014314	30946826	66	1	0	0	0	0	1	37	79	25	93	74	36	7	1	2	0	1	0	0		0	0	2	1	52	52	44	48	172	16	224	25	24	0	0	0	0	0	1	1	0	200	0	1	0	0
11617629	27409048	30946989	60	1	1	0	1	0	1	37	116	26	96	48	15	10	1	1	0	1	1	1	1	0	1	3	1	123	123	123	123	234	51	304	44	33	0	0	0	0	0	1	1	0	200	0	1	0	0
10846671	25457731	30949248	78	0	1	0	1	1	0	35	71	13	100	71	10	10	3	1	0	1	1	1	0	0	1	4	1	943	943	943	943	58	27	94	32	23	1	1	1	1	0	1	2	1	800	0	0	0	0
14877722	26538263	30953061	87	0	0	1	0	1	1	37	103	18	100	80	3	9	1	1	1	0	0	0		0	0	2	1	55	55	55	55	261	19	339	10	4	0	0	0	0	0	1	1	0	200	0	1	0	0
13411253	26214960	30953177	83	0	0	0	0	1	0	37	129	18	93	85	12	10	2	2	1	1	1	0	1	0	0	6	1	429	429	429	429	79	27	103	6	6	1	1	1	1	0	1	2	1	400	0	0	1	0
15040166	25781004	30956907	85	0	0	0	1	0	0	37	75	21	91	63	7	12	1	1	0	1	0	0		0	0	2	1	408	408	408	408	167	46	217	7	4	0	0	0	0	0	1	2	1	400	0	0	1	0
15386471	24413689	30963142	29	0	0	0	0	0	1	37	109	17	95	92	7	10	0	1	1	1	0	0		0	0	4	1	60	60	60	60	136	38	177	9	9	0	0	0	0	0	0	1	0	200	0	1	0	0
19643419	28302381	30964824	50	0	0	0	0	0	1	37	49	13	99	84	10	9	0	1	1	1	0	0		0	0	2	1	255	255	255	255	139	20	181	9	2	0	0	0	0	1	1	2	1	400	0	0	1	0
19692617	27904940	30978260	81	0	1	0	0	1	0	35	57	15	100	59	18	10	2	2	1	1	1	1	0	0	0	4	1	1922	1922	1922	1922	90	34	137	24	24	1	1	1	1	0	1	2	1	1800	0	0	0	0
13593845	28793290	30979707	29	0	1	0	0	0	0	37	102	20	100	79	8	10	1	1	0	0	0	0		0	0	3	1	124	127	124	126	202	89	263	14	7	0	0	0	0	0	1	1	0	200	0	1	0	0
18625383	22002364	30981861	50	0	0	0	0	0	1	38	101	19	98	77	15	8	1	1	1	0	0	0		0	0	6	1	145	145	145	145	134	44	174	7	4	1	1	0	0	0	1	1	0	200	0	1	0	0
16880700	26855218	30982591	76	0	1	0	0	0	0	37	96	18	97	63	10	11	3	4	1	0	1	0	1	0	0	6	1	698	698	698	698	174	69	229	131	3	0	0	0	0	0	1	2	1	600	0	0	0	1
11692282	24005826	30987723	72	0	1	0	1	0	0	34	57	21	100	92	14	9	2	2	0	1	0	0		0	0	3	1	132	132	132	132	149	19	194	6	3	0	0	0	0	0	1	1	0	200	0	1	0	0
15824797	25863554	30993958	60	0	1	0	0	0	1	38	72	14	97	72	13	7	1	2	1	1	0	0		0	0	2	1	852	852	852	852	104	36	135	17	11	0	0	0	0	0	1	2	1	800	0	0	0	0
14806366	23470149	30994617	56	1	0	1	0	0	0	38	107	19	95	91	1	10	1	3	1	1	0	0		0	0	2	1	800	800	800	800	104	61	135	39	7	0	0	0	0	0	1	2	1	800	0	0	0	0
15662245	27828265	31003190	79	0	1	0	1	1	1	37	84	23	92	98	7	13	2	1	0	0	0	0		0	0	5	1	130	130	130	130	229	188	298	2	1	0	0	0	0	0	1	1	0	200	0	1	0	0
16845760	20145464	31003633	82	0	0	0	0	1	1	37	96	27	99	58	12	10	2	1	0	0	0	0		0	0	2	1	17	17	17	17	209	243	272	6	1	0	0	0	0	0	0	0	0	0	1	0	0	0
12275456	28006929	31013772	41	1	0	0	0	0	0	37	74	18	99	93	3	11	2	2	0	1	0	0		0	0	5	1	7183	7183	7183	7183	252	210	328	10	1	0	0	0	0	0	0	2	1	2000	0	0	0	0
13010538	22334379	31014549	67	1	0	0	1	0	0	37	79	21	100	71	10	11	1	1	0	1	0	0		0	0	4	1	214	214	214	214	171	74	222	3	1	0	0	0	0	0	0	1	0	200	0	1	0	0
17159056	28427719	31023101	72	1	1	0	0	0	0	35	84	14	100	44	19	12	1	1	1	1	0	0		0	0	4	1	469	469	469	469	77	17	100	12	11	1	1	1	1	0	1	2	1	400	0	0	1	0
19295574	25556745	31026270	52	0	0	0	0	0	0	37	81	20	97	67	2	8	1	1	0	0	0	0		0	0	3	1	18	18	18	18	208	128	270	4	1	0	0	0	0	0	0	0	0	0	1	0	0	0
16567081	25565474	31028994	76	0	1	0	0	1	1	37	121	30	98	63	9	8	6	1	0	1	0	0		0	0	5	1	211	211	211	211	181	15	235	19	6	0	0	0	0	0	1	1	0	200	0	1	0	0
18550032	27592351	31032149	56	0	0	1	0	0	1	36	53	16	99	72	8	9	1	2	0	1	0	0		0	0	3	1	1416	1416	1416	1416	127	184	161	23	7	0	1	0	0	1	1	2	1	1400	0	0	0	0
17962978	20502339	31032577	48	1	0	0	0	0	1	37	114	28	100	83	5	9	1	4	1	1	0	0		0	0	6	1	4308	4308	4308	4308	103	102	138	16	16	1	1	1	1	1	1	2	1	2000	0	0	0	0
15430446	25931747	31036877	91	0	1	0	1	0	1	37	56	26	86	79	11	10	1	1	0	1	1	1	0	0	0	2	1	180	180	180	180	203	10	264	13	4	0	0	0	0	0	1	1	0	200	0	1	0	0
12105240	22431984	31038811	90	0	1	0	0	0	0	36	80	17	100	47	1	6	1	1	1	1	0	0		0	0	3	1	532	532	532	532	91	95	118	12	3	0	0	0	0	0	1	2	1	400	0	0	1	0
11862995	23490078	31053289	82	1	0	0	0	0	1	37	53	20	91	90	7	11	1	1	1	1	1	1	0	0	0	2	1	407	407	407	407	76	20	99	22	22	0	0	0	0	1	1	2	1	400	0	0	1	0
18595483	28331184	31053868	87	0	0	1	0	0	1	36	84	17	92	89	8	11	1	2	1	1	0	0		0	0	6	1	611	611	335	467	146	55	185	7	6	1	1	1	0	0	1	2	1	600	0	0	0	1
17238051	28442853	31059172	24	0	0	0	0	0	1	38	80	37	95	64	7	14	1	1	0	1	1	0	0	0	1	7	1	262	262	262	262	138	64	179	46	15	0	0	0	0	1	1	1	0	200	0	1	0	0
18083893	27616048	31068539	68	0	0	1	1	0	1	36	56	16	100	67	17	16	1	3	1	1	0	0		0	0	3	1	312	312	312	312	169	134	220	3	3	1	1	1	0	1	1	2	1	400	0	0	1	0
13431265	29875873	31069304	92	1	0	0	0	0	1	35	87	18	99	49	9	11	2	1	1	1	0	0		0	0	4	1	620	620	620	620	135	47	176	6	5	0	0	0	0	1	0	2	1	600	0	0	0	1
10874066	29765862	31080524	59	0	0	0	0	0	0	37	101	16	99	66	2	7	0	1	1	0	1	0	1	0	1	3	1	723	723	723	723	211	65	274	117	27	0	0	0	0	0	1	2	1	600	0	0	0	1
19862115	24736010	31085325	65	1	0	0	0	0	1	39	100	32	98	85	15	8	1	2	0	1	0	0		0	0	4	1	237	237	237	237	186	19	242	6	3	0	0	0	0	0	0	1	0	200	0	1	0	0
12311243	26298326	31098408	61	0	0	0	0	0	1	36	66	27	95	72	13	10	2	1	1	1	0	0		0	0	2	1	637	637	637	637	107	66	139	24	2	0	0	0	0	1	0	2	1	600	0	0	0	1
14131361	21230638	31102093	32	0	0	0	0	0	0	37	140	19	100	62	22	8	1	2	0	0	1	0	0	0	1	4	1	521	521	521	521	128	21	166	32	17	0	0	0	0	1	1	2	1	400	0	0	1	0
13465429	27335508	31106610	57	0	0	0	0	0	1	37	120	23	92	73	8	10	0	2	0	1	0	0		0	0	2	1	7294	7294	7294	7294	80	20	104	2	2	1	1	0	0	0	0	2	1	2000	0	0	0	0
14528420	25101147	31110082	43	0	0	0	0	0	0	38	116	31	100	108	3	10	1	1	0	1	1	0	0	1	1	6	1	7754	7754	7754	7754	137	22	180	17	7	0	0	0	0	0	1	2	1	2000	0	0	0	0
11959081	28101543	31124836	57	1	0	0	0	0	1	37	97	21	99	76	17	10	1	3	0	1	0	0		0	0	4	1	1847	1847	1847	1847	70	51	91	4	4	1	1	1	1	0	1	2	1	1800	0	0	0	0
12186469	26932075	31131596	90	1	0	0	0	0	1	37	81	17	99	69	15	8	1	1	1	1	0	0		0	0	2	1	31	31	31	31	176	32	229	8	5	0	0	0	0	0	0	1	0	200	0	1	0	0
10331854	21008158	31132384	84	0	1	1	0	0	1	38	84	32	97	63	8	9	1	1	0	1	0	0		0	0	4	1	1205	1205	1205	1205	180	35	234	4	1	1	1	0	0	0	0	2	1	1200	0	0	0	0
15293615	22063048	31133212	61	1	0	1	0	0	1	38	94	19	98	92	9	12	4	1	1	1	1	0	1	0	0	4	1	36963	41860	33281	35657	181	289	235	22	15	0	0	0	0	0	1	2	1	2000	0	0	0	0
14342500	29209752	31133450	58	0	0	1	0	1	1	39	93	25	96	91	9	10	1	1	0	1	1	1	0	0	0	2	1	2202	2202	2202	2202	77	29	100	17	17	0	0	0	0	0	1	2	1	2000	0	0	0	0
10480735	23797227	31142090	50	1	0	1	0	0	0	37	51	20	100	80	8	11	2	2	0	1	0	0		0	0	5	1	322	322	322	322	190	130	247	14	4	0	0	0	0	0	1	1	0	200	0	1	0	0
12430647	25808717	31146615	65	0	1	1	1	1	0	38	51	15	96	68	10	14	2	1	0	0	1	0	0	0	0	3	1	523	523	523	523	151	52	196	18	14	0	0	0	0	1	1	2	1	400	0	0	1	0
16554609	22271705	31146994	55	1	0	1	0	0	1	36	105	22	99	68	5	9	1	2	1	1	0	0		0	0	2	1	287	287	287	287	168	9	218	8	2	0	0	0	0	0	1	2	1	400	0	0	1	0
16178097	27286024	31149549	63	0	0	0	0	0	1	37	85	16	99	89	3	9	1	1	0	1	1	0	0	0	1	4	1	71	71	71	71	191	185	248	12	3	0	0	0	0	0	1	1	0	200	0	1	0	0
13984508	24117490	31150594	48	1	0	1	0	0	0	34	99	32	89	62	40	11	1	4	1	1	1	0	1	0	0	9	1	11244	11244	8354	9799	119	71	151	23	23	0	0	0	0	1	1	2	1	2000	0	0	0	0
14146667	22460577	31151064	55	0	0	0	0	0	1	36	71	21	99	68	12	8	1	1	1	1	0	0		0	0	3	1	635	635	635	635	77	106	100	25	5	0	0	0	0	1	1	2	1	600	0	0	0	1
12134620	25109179	31156233	73	0	1	1	1	0	1	37	78	25	100	76	19	8	1	1	0	1	0	0		0	0	2	1	3723	3723	3412	3568	88	11	114	40	13	0	0	0	0	1	1	2	1	2000	0	0	0	0
18629932	22270452	31164656	59	1	0	0	0	0	1	37	97	24	100	97	14	14	2	2	0	1	0	0		0	0	3	1	7874	7874	7874	7874	179	89	233	12	2	0	0	0	0	0	1	2	1	2000	0	0	0	0
19477196	25370449	31172345	61	1	0	1	0	0	0	38	86	11	100	86	31	8	1	2	0	1	0	0		0	0	4	1	63	63	63	63	172	60	224	4	4	1	1	1	1	1	1	1	0	200	0	1	0	0
13725270	25077943	31173738	75	1	0	1	0	0	1	37	65	13	97	77	9	11	1	1	1	0	0	0		0	0	6	1	292	292	292	292	141	57	183	20	3	0	0	0	0	0	1	2	1	400	0	0	1	0
16957926	23975043	31173862	70	0	1	1	1	0	1	37	83	29	93	75	9	7	3	4	0	0	0	0		0	0	7	1	32852	32852	32852	32852	115	102	150	2	2	1	1	1	1	1	1	2	1	2000	0	0	0	0
14056364	22513707	31184028	61	0	0	0	0	0	1	35	109	26	93	93	8	8	8	2	0	1	0	0		0	0	4	1	414	414	414	414	154	38	200	24	10	0	0	0	0	0	1	2	1	400	0	0	1	0
14813021	28126941	31187694	63	1	0	1	0	0	0	37	80	18	96	55	20	11	8	1	1	1	1	0	1	0	0	3	1	330	330	330	330	162	20	211	17	17	0	0	0	0	1	1	2	1	400	0	0	1	0
13495682	28598367	31188923	54	0	1	1	0	1	1	37	79	29	100	74	13	9	4	4	0	1	0	0		0	0	3	1	372	372	372	372	134	39	174	17	17	0	0	0	0	0	1	1	0	200	0	1	0	0
17320756	20998896	31188944	44	1	0	1	1	0	0	39	102	17	98	62	8	10	0	1	0	1	1	0	1	1	1	4	1	658	658	658	658	222	48	289	27	19	0	0	0	0	0	1	2	1	600	0	0	0	1
15484593	28986995	31189781	60	1	1	0	1	0	0	37	80	18	99	121	14	16	1	3	0	0	0	0		0	0	3	1	1384	1384	1384	1384	162	207	214	22	11	0	0	0	0	1	1	2	1	1200	0	0	0	0
11936013	20905334	31191879	52	0	0	0	0	0	0	37	106	22	99	69	23	10	1	2	0	1	1	0	0	0	1	2	1	1161	1161	602	882	79	19	74	40	23	0	0	0	0	0	1	2	1	1000	0	0	0	0
19551213	24704510	31193347	37	0	0	0	0	0	0	37	88	20	100	62	13	13	1	2	0	1	1	0	0	1	0	4	1	1277	1277	1277	1277	157	194	204	8	5	0	0	0	0	0	0	2	1	1200	0	0	0	0
18953418	20003543	31193392	66	0	0	0	0	1	1	37	109	23	98	78	5	8	2	4	1	0	0	0		0	0	8	1	5098	6032	5098	5565	107	142	139	8	3	0	0	0	0	1	1	2	1	2000	0	0	0	0
16418029	25691325	31193581	34	1	1	1	0	0	1	39	120	19	97	79	11	9	1	1	0	1	0	0		0	0	2	1	4820	4820	4820	4820	146	15	190	37	28	0	0	0	0	0	1	2	1	2000	0	0	0	0
18539425	24277049	31193730	50	1	0	0	0	0	0	37	121	16	93	71	1	8	2	1	0	1	0	0		0	0	2	1	36963	37129	15307	25640	115	80	153	3	4	1	1	1	1	0	1	2	1	2000	0	0	0	0
15883493	25974996	31195694	66	0	0	1	1	1	0	36	116	12	97	76	24	10	3	3	0	1	0	0		0	0	4	1	157	157	157	157	196	56	255	16	10	0	0	0	0	1	1	1	0	200	0	1	0	0
14547135	27587940	31216618	25	0	1	0	0	0	1	38	89	20	99	61	10	12	3	1	0	1	0	0		0	0	10	1	371	371	371	371	102	45	133	31	3	0	0	0	0	0	1	1	0	200	0	1	0	0
15690435	22633087	31218485	49	1	0	1	1	0	1	36	102	16	99	89	6	11	2	2	0	1	0	0		0	0	2	1	360	360	360	360	96	27	125	11	8	0	0	0	0	1	1	1	0	200	0	1	0	0
13134081	27076781	31228755	73	0	1	1	1	1	1	37	93	13	100	71	18	10	5	1	0	1	0	0		0	0	6	1	1431	1431	1431	1431	119	14	155	9	6	0	1	0	0	0	1	2	1	1400	0	0	0	0
16613914	29715344	31229998	40	1	0	0	0	0	0	37	97	20	100	78	23	8	1	3	0	0	1	1	0	0	0	6	1	6616	6616	722	3669	75	130	98	15	12	1	1	1	1	0	1	2	1	2000	0	0	0	0
11218151	21620094	31234815	66	1	0	0	0	0	1	39	104	16	91	80	9	9	0	1	1	1	1	1	0	0	0	3	1	293	293	293	293	143	37	186	38	23	1	1	1	0	0	1	2	1	400	0	0	1	0
18909606	21649918	31234919	89	0	0	0	0	1	1	37	65	13	100	78	11	9	7	1	1	1	0	0		0	0	4	1	185	185	185	185	171	108	222	4	2	0	0	0	0	0	0	2	1	400	0	0	1	0
19271750	23190436	31248750	68	1	0	0	0	0	1	37	81	12	100	62	5	10	1	1	0	1	0	0		0	0	2	1	21	21	21	21	279	229	363	4	1	0	0	0	0	0	1	0	0	0	1	0	0	0
18740696	26385365	31250931	65	1	0	0	0	0	1	36	101	27	100	78	13	10	1	3	1	1	0	0		0	0	5	1	2101	2101	2101	2101	151	181	196	14	3	1	1	1	0	0	1	2	1	2000	0	0	0	0
11746096	23762829	31251562	85	1	1	1	1	0	0	36	96	23	92	79	15	12	1	2	0	1	0	0		0	0	2	1	1911	1911	1911	1911	166	61	216	6	2	0	1	0	0	0	1	2	1	1800	0	0	0	0
15331748	20665416	31261388	43	0	0	0	0	0	0	37	59	10	99	85	15	11	1	2	1	1	0	0		0	0	2	1	85	85	85	85	172	24	224	5	3	0	0	0	0	0	1	1	0	200	0	1	0	0
16504969	24507010	31262149	63	0	1	1	0	1	1	38	83	32	94	84	9	9	6	3	0	1	1	1	0	0	0	11	1	1356	1356	1356	1356	180	25	234	15	15	1	1	1	1	1	1	2	1	1200	0	0	0	0
18487097	23436329	31271196	71	0	0	0	0	0	1	37	106	23	98	121	10	7	4	2	0	1	0	0		0	0	10	1	844	844	844	844	124	134	161	22	20	1	1	1	1	0	1	2	1	800	0	0	0	0
18508091	24193971	31272950	91	1	1	0	0	0	0	37	75	21	96	63	9	9	1	1	0	1	0	0		0	0	2	1	698	698	698	698	147	25	191	5	1	0	1	0	0	0	0	2	1	600	0	0	0	1
17244595	26597499	31277417	62	0	1	0	0	0	0	37	83	16	96	67	7	11	1	1	0	1	0	0		0	0	5	1	120	121	120	121	190	12	239	7	4	0	0	0	0	1	1	1	0	200	0	1	0	0
16215286	21357835	31277766	58	1	0	0	0	0	1	38	140	37	93	72	11	8	1	3	0	1	1	1	0	0	0	7	1	443	443	443	443	177	10	230	38	14	0	0	0	0	0	1	2	1	400	0	0	1	0
12212162	28060124	31280452	46	0	0	1	0	0	1	38	117	37	94	92	19	12	1	2	0	1	0	0		0	0	2	1	906	906	906	906	145	17	189	5	2	0	0	0	0	0	1	2	1	800	0	0	0	0
13999026	29100712	31284295	60	0	0	0	0	0	1	36	73	20	100	76	6	9	1	1	0	1	0	0		0	0	3	1	258	258	258	258	94	114	122	13	3	0	0	0	0	1	1	1	0	200	0	1	0	0
19312736	21311611	31288304	67	0	1	0	1	1	1	38	112	24	97	118	18	9	2	1	0	1	1	0	0	1	1	3	1	1249	1249	782	1016	166	37	219	48	25	0	0	0	0	0	1	2	1	1200	0	0	0	0
19651093	26488509	31292653	83	1	0	0	0	0	1	37	64	16	96	52	5	9	1	2	0	0	1	0	1	1	1	2	1	8444	8444	8444	8444	140	30	184	108	20	0	0	1	0	1	1	2	1	2000	0	0	0	0
16562438	24094146	31302476	65	0	1	1	0	1	1	38	118	32	95	60	6	10	4	2	0	1	0	0		0	0	7	1	269	269	269	269	166	34	212	10	4	0	0	0	0	1	1	1	0	200	0	1	0	0
17241424	23703615	31302803	30	0	0	0	0	0	1	37	108	24	100	76	10	7	1	3	0	1	1	0	0	0	1	4	1	714	714	714	714	161	13	209	25	18	0	0	0	0	1	1	2	1	600	0	0	0	1
18523436	25362058	31302838	79	1	0	0	0	0	1	34	101	28	92	54	18	12	3	2	1	1	0	0		0	0	8	1	986	986	986	986	175	83	228	2	1	1	1	1	1	1	1	2	1	800	0	0	0	0
16497768	23432405	31303342	41	0	1	0	1	1	0	37	112	25	99	99	7	7	8	1	0	1	1	1	0	0	0	5	1	1816	1816	1816	1816	101	32	131	14	6	0	0	0	0	0	1	2	1	1800	0	0	0	0
18104767	21318039	31303914	42	1	0	0	0	0	1	38	100	22	91	81	9	8	1	2	0	1	0	0		0	0	5	1	483	483	483	483	131	41	170	29	29	0	0	0	0	1	1	2	1	400	0	0	1	0
14414707	28666677	31306538	69	0	0	0	0	1	1	37	57	15	96	56	9	7	2	2	0	0	0	0		0	0	8	1	465	472	465	469	74	53	96	12	10	1	1	1	1	1	1	2	1	400	0	0	1	0
12532170	26843732	31307790	50	0	0	1	0	0	1	37	103	20	98	99	14	11	1	2	1	1	0	0		0	0	4	1	594	594	594	594	163	38	206	4	2	0	0	0	0	1	1	2	1	400	0	0	1	0
12785112	26409958	31318322	41	0	0	0	0	0	1	37	89	15	100	66	8	9	1	1	1	1	0	0		0	0	2	1	85	85	85	85	209	33	272	28	21	0	0	0	0	0	1	1	0	200	0	1	0	0
10478435	25756660	31325649	57	0	0	0	0	0	1	37	121	22	98	99	22	10	1	3	0	1	0	0		0	0	4	1	3044	3044	3044	3044	74	100	96	17	3	0	0	0	0	0	0	2	1	2000	0	0	0	0
16873164	23710972	31330227	65	0	0	0	0	0	1	37	79	20	100	74	15	7	3	1	1	1	1	1	0	0	0	8	1	3759	3759	3759	3759	154	52	200	15	7	0	1	0	0	0	1	2	1	2000	0	0	0	0
15595201	23546406	31332873	38	0	0	0	0	0	1	38	126	25	98	79	24	9	1	1	0	1	0	0		0	0	5	1	885	885	885	885	69	10	90	21	17	0	0	0	0	0	1	2	1	800	0	0	0	0
17398573	25139888	31358442	93	1	0	0	0	0	1	37	69	20	98	81	13	11	2	2	1	0	0	0		0	0	3	1	208	208	208	208	212	26	276	3	1	0	0	0	0	1	0	2	1	400	0	0	1	0
12382495	22763290	31358856	68	1	0	0	0	0	1	37	114	28	93	70	24	9	0	1	1	1	0	0		0	0	6	1	94	94	94	94	154	13	200	20	20	0	0	0	0	1	1	1	0	200	0	1	0	0
18830695	25124186	31365006	50	0	0	0	0	0	1	39	89	17	98	99	33	11	1	2	1	1	1	0	1	1	0	5	1	811	811	811	811	129	50	168	33	21	0	0	0	0	0	1	2	1	800	0	0	0	0
15221419	29474406	31367662	70	1	0	0	0	0	1	37	87	25	92	69	2	12	6	3	1	1	0	0		0	0	3	1	956	956	956	956	156	65	203	20	20	0	0	0	0	1	1	2	1	800	0	0	0	0
19287914	27288489	31368984	64	0	0	0	0	0	0	38	79	13	98	72	5	11	1	3	1	1	0	0		0	0	2	1	58	58	58	58	215	254	280	10	2	0	0	0	0	0	1	1	0	200	0	1	0	0
11542962	26959987	31372375	83	1	0	1	0	0	0	36	84	21	98	61	11	9	1	1	1	1	0	0		0	0	3	1	389	389	389	389	106	48	138	4	2	0	0	0	0	1	1	2	1	400	0	0	1	0
17074541	23192877	31373442	64	0	1	0	0	0	1	36	106	26	94	81	14	14	1	3	0	1	1	1	0	0	0	2	1	1054	1054	1054	1054	173	44	225	17	9	0	1	0	0	0	1	2	1	1000	0	0	0	0
14940823	23149252	31377904	28	0	1	0	0	0	1	37	71	15	98	52	7	9	1	2	1	1	1	1	1	0	0	8	1	102	102	102	102	171	34	222	73	58	0	0	0	0	0	1	1	0	200	0	1	0	0
19008919	24637587	31378373	28	0	0	0	0	0	1	37	130	21	99	82	6	10	1	1	1	1	0	0		0	0	2	1	152	152	152	152	192	25	250	3	1	0	0	0	0	0	0	2	1	400	0	0	1	0
17638202	21206625	31378564	60	1	1	0	1	0	1	34	78	24	96	77	22	16	1	1	0	1	0	0		0	0	2	1	226	226	226	226	181	36	235	10	7	0	0	0	0	1	1	1	0	200	0	1	0	0
10829581	27844613	31378939	70	0	1	1	1	1	1	37	104	27	96	90	14	8	1	1	0	1	1	0	0	0	1	9	1	2892	2892	2892	2892	80	31	104	41	6	0	0	0	0	1	1	2	1	2000	0	0	0	0
13520743	25670624	31382891	53	0	0	1	0	0	0	38	117	28	96	69	5	12	1	2	0	1	0	0		0	0	2	1	36963	37175	33281	35657	204	65	265	8	3	0	0	0	0	0	1	2	1	2000	0	0	0	0
16302136	21713675	31384058	51	0	0	1	0	0	1	37	107	25	97	100	16	8	0	2	0	0	0	0		0	0	3	1	1073	1073	1073	1073	128	44	166	16	2	0	1	0	0	0	0	2	1	1000	0	0	0	0
13895599	27633137	31388583	55	0	0	0	0	0	1	37	95	13	99	76	4	12	3	2	1	1	0	0		0	0	2	1	814	1283	814	1049	169	116	196	9	6	0	0	0	0	1	1	2	1	800	0	0	0	0
16767959	22062066	31389801	41	0	1	1	1	1	1	37	128	18	100	101	10	7	3	1	0	1	1	0	1	1	0	3	1	731	731	731	731	53	9	69	7	7	1	1	1	1	0	1	2	1	600	0	0	0	1
14512069	24299990	31389890	80	0	0	1	0	0	1	35	75	13	100	92	9	11	1	1	0	1	1	0	1	0	0	2	1	109	109	83	96	233	80	222	17	6	0	0	0	0	0	1	1	0	200	0	1	0	0
17292566	28612741	31400916	85	1	1	1	0	0	0	37	130	30	95	93	8	13	2	1	0	1	0	0		0	0	2	1	106	106	106	106	183	30	238	8	6	0	0	0	0	0	1	1	0	200	0	1	0	0
10803232	27581343	31407544	58	0	1	0	0	0	1	39	103	28	100	67	3	8	1	2	1	1	1	0	1	0	0	4	1	225	225	225	225	149	156	194	31	7	0	0	0	0	0	1	2	1	400	0	0	1	0
16431163	24977987	31416245	79	1	1	0	0	0	0	37	101	17	100	94	40	9	3	1	0	1	0	0		0	0	4	1	1037	1037	1037	1037	105	36	137	5	5	1	1	1	1	0	1	2	1	1000	0	0	0	0
13655370	27210594	31417223	83	0	0	0	0	1	1	37	76	10	100	60	31	8	2	1	0	1	0	0		0	0	2	1	1069	1069	1069	1069	66	46	86	11	4	1	1	1	0	1	1	2	1	1000	0	0	0	0
15749437	27295640	31417634	54	1	1	0	0	0	0	36	107	20	96	80	16	12	2	2	0	1	0	0		0	0	6	1	112	140	112	126	248	17	322	16	13	0	0	0	0	0	1	1	0	200	0	1	0	0
11549544	22200184	31424551	40	0	1	0	0	0	1	37	94	26	99	64	30	8	5	2	0	1	0	0		0	0	8	1	877	877	877	877	143	167	186	1	1	1	1	1	1	0	1	2	1	800	0	0	0	0
19710787	24381327	31436871	61	0	0	0	0	0	1	36	138	16	94	100	17	12	1	1	0	1	0	0		0	0	2	1	1073	1073	1073	1073	105	109	137	28	24	0	1	0	0	0	1	2	1	1000	0	0	0	0
19993726	20161163	31439824	53	0	0	0	0	0	1	37	124	18	100	55	6	10	1	1	1	0	1	0	0	1	0	2	1	120	120	40	80	141	7	134	18	9	0	0	0	0	0	0	1	0	200	0	1	0	0
18486555	29674405	31441718	48	0	1	0	1	0	1	37	99	13	96	61	24	10	2	1	0	0	1	1	1	0	0	5	1	390	443	142	325	265	14	285	116	40	0	0	0	0	1	1	1	0	200	0	1	0	0
13830137	26514599	31445489	67	0	1	1	1	1	0	37	74	14	100	68	13	10	2	3	1	1	1	1	0	1	1	2	1	326	351	199	293	99	113	159	36	31	0	1	1	1	0	1	2	1	400	0	0	1	0
19640059	22418672	31446775	75	1	0	0	0	0	1	37	74	14	100	71	7	7	1	1	1	1	0	0		0	0	2	1	38	38	38	38	218	15	283	9	1	0	0	0	0	0	0	1	0	200	0	1	0	0
11533366	27199660	31451880	65	0	0	0	0	1	0	37	102	17	100	93	15	9	2	3	1	1	0	0		0	0	2	1	15372	15372	2224	8798	171	238	222	22	22	0	0	0	0	0	1	2	1	2000	0	0	0	0
13337664	29966638	31456598	68	0	0	0	0	0	0	37	91	17	100	57	36	12	2	1	1	1	0	0		0	0	7	1	637	637	637	637	58	52	75	31	8	0	1	0	0	0	1	2	1	600	0	0	0	1
11848597	23921396	31471562	72	0	1	1	1	1	1	37	65	9	100	67	17	12	4	1	0	1	0	0		0	0	3	1	86	86	86	86	227	39	295	21	2	0	1	0	0	1	1	1	0	200	0	1	0	0
13687496	25755550	31473306	91	1	1	0	0	0	1	37	87	23	97	49	8	10	1	3	1	1	1	0	1	0	0	3	1	177	177	177	177	145	49	189	33	1	0	1	0	0	1	1	2	1	400	0	0	1	0
15267238	23915144	31474907	61	0	0	0	0	1	1	37	133	22	96	50	16	11	4	2	1	1	1	0	0	0	1	3	1	474	474	474	474	75	37	98	46	5	0	0	0	0	1	1	2	1	400	0	0	1	0
12748404	24174303	31476501	40	0	0	0	0	0	0	36	90	24	96	80	13	15	2	3	0	1	1	1	0	0	0	3	1	10479	10479	5908	8194	88	119	114	17	17	1	1	1	1	0	1	2	1	2000	0	0	0	0
13134704	25768058	31483914	62	0	1	1	0	1	0	37	77	23	100	66	15	8	3	2	0	0	1	0	1	0	0	7	1	6320	6320	6320	6320	145	23	189	44	3	0	0	0	0	1	1	2	1	2000	0	0	0	0
11437366	21503098	31486926	91	0	1	1	0	1	1	37	91	15	100	53	20	6	3	2	0	1	0	0		0	0	2	1	2137	2137	2137	2137	115	21	150	7	7	0	1	0	0	0	1	2	1	2000	0	0	0	0
11655439	20060353	31489806	73	1	0	0	1	0	1	37	67	21	100	64	14	15	1	2	0	1	0	0		0	0	7	1	182	182	182	182	223	65	290	6	3	0	0	0	0	1	1	1	0	200	0	1	0	0
19197579	26299138	31495164	27	0	0	0	0	0	0	38	133	37	98	53	19	11	2	4	0	1	1	0	1	1	0	5	1	787	2660	787	1724	169	45	220	49	49	0	0	0	0	0	1	2	1	600	0	0	0	1
13777749	27550735	31496939	87	0	1	0	1	1	0	36	107	16	94	65	7	16	2	1	0	1	0	0		0	0	5	1	136	136	136	136	230	77	299	7	3	0	0	0	0	0	1	1	0	200	0	1	0	0
17007441	20790097	31504988	58	1	0	1	0	0	1	38	117	19	93	65	11	11	1	3	0	1	0	0		0	0	3	1	165	165	165	165	248	57	322	24	24	0	0	0	0	0	1	1	0	200	0	1	0	0
19891424	27545155	31505304	47	1	1	0	0	0	0	36	87	13	100	76	22	14	1	3	0	1	0	0		0	0	6	1	718	718	718	718	218	13	283	30	13	0	0	0	0	1	1	2	1	600	0	0	0	1
18335310	23964084	31507319	82	0	1	0	1	0	0	37	59	17	97	53	9	9	2	2	1	1	0	0		0	0	3	1	1480	1480	1480	1480	222	31	289	19	2	1	1	1	0	0	1	2	1	1400	0	0	0	0
13840732	26949782	31510447	61	0	1	0	0	0	1	39	83	29	96	99	9	8	1	1	0	0	1	0	0	1	0	8	1	359	359	359	359	109	17	142	31	23	0	0	0	0	0	1	1	0	200	0	1	0	0
14115302	22172706	31522732	84	0	1	0	1	0	1	36	86	22	93	69	1	7	1	2	0	1	0	0		0	0	2	1	2862	2862	2862	2862	138	72	179	7	4	0	0	0	0	0	1	2	1	2000	0	0	0	0
11972269	21676141	31538024	57	1	0	0	0	0	0	37	84	27	96	47	21	10	3	3	1	0	0	0		0	0	4	1	673	673	673	673	104	49	138	1	1	1	1	1	1	1	1	2	1	600	0	0	0	1
12289074	23635485	31544530	57	0	1	1	1	1	1	38	99	20	93	53	12	8	7	2	0	0	0	0		0	0	4	1	7195	7195	7195	7195	153	41	199	18	3	0	0	0	0	0	1	2	1	2000	0	0	0	0
10648503	23397542	31573495	52	0	0	0	0	0	0	36	129	21	97	74	9	8	1	3	0	1	1	0	0	0	1	2	1	262	262	262	262	82	8	107	20	5	0	0	0	0	1	1	1	0	200	0	1	0	0
11863409	21905130	31580087	73	0	1	0	0	0	0	37	117	20	100	55	7	8	1	4	0	1	0	0		0	0	2	1	1221	1221	1221	1221	138	18	179	7	7	1	1	1	1	1	1	2	1	1200	0	0	0	0
19438229	25379540	31582530	83	1	0	0	1	0	0	37	102	24	98	74	12	13	1	2	1	1	0	0		0	0	2	1	215	215	215	215	90	91	117	8	3	0	0	0	0	0	1	2	1	400	0	0	1	0
15094735	21182723	31583169	69	0	1	1	1	1	0	36	82	17	100	62	3	8	6	2	0	1	1	0	0	1	0	7	1	821	821	821	821	131	27	170	19	11	0	0	0	0	0	1	2	1	800	0	0	0	0
16103537	26250746	31588174	79	0	1	0	0	1	1	37	60	20	99	54	9	8	3	2	1	1	1	0	1	0	0	2	1	46	46	46	46	274	20	356	17	2	0	1	0	0	1	1	1	0	200	0	1	0	0
17319358	24737525	31592547	67	0	0	0	0	0	1	38	111	18	94	73	4	10	0	2	0	1	0	0		0	0	2	1	424	424	424	424	228	33	296	7	2	0	0	0	0	0	0	2	1	400	0	0	1	0
18409091	27072924	31592704	79	0	1	1	0	1	0	38	73	18	96	55	15	9	2	2	1	1	0	0		0	0	4	1	578	578	578	578	128	8	166	19	19	0	1	0	0	1	1	2	1	400	0	0	1	0
14235272	29585914	31593084	76	0	0	1	1	1	1	37	90	20	91	78	16	9	3	4	0	1	0	0		0	0	3	1	933	933	933	933	103	53	134	9	3	1	1	1	0	0	1	2	1	800	0	0	0	0
14382048	27648995	31593624	64	0	0	1	0	1	1	37	59	14	98	77	13	7	8	2	0	0	1	0	0	0	0	6	1	4443	4443	4443	4443	112	55	141	30	11	0	0	0	0	1	1	2	1	2000	0	0	0	0
14338819	29382019	31595782	94	1	1	0	1	0	1	37	72	14	99	71	17	7	1	2	1	1	0	0		0	0	4	1	227	227	227	227	141	18	183	25	13	0	0	0	0	0	1	2	1	400	0	0	1	0
11022245	29881372	31599600	61	1	1	0	1	0	1	37	87	26	99	54	13	7	3	4	0	1	0	0		0	0	4	1	55	55	55	55	248	16	322	13	9	0	0	0	0	1	1	1	0	200	0	1	0	0
17302319	22835877	31600062	61	0	0	0	0	0	1	37	96	26	96	57	31	9	1	2	0	1	1	0	1	0	0	2	1	1183	1183	1183	1183	113	24	147	12	3	0	0	0	0	0	1	2	1	1000	0	0	0	0
17657063	27717608	31616403	51	0	0	0	0	0	1	37	72	10	99	58	12	6	1	1	1	0	0	0		0	0	2	1	563	563	563	563	98	13	127	3	2	0	1	0	0	0	1	2	1	400	0	0	1	0
17873103	27750553	31617347	36	0	0	0	0	0	1	37	83	24	100	86	31	11	1	2	0	0	0	0		0	0	2	1	114	114	114	114	202	13	263	18	12	0	0	0	0	1	1	1	0	200	0	1	0	0
10688510	28805457	31618429	58	0	1	1	1	0	0	36	100	18	96	58	18	15	2	1	0	1	0	0		0	0	5	1	369	369	369	369	163	65	207	13	6	0	0	0	0	1	1	1	0	200	0	1	0	0
19655310	23438001	31620848	48	0	0	0	0	0	1	36	76	10	94	62	14	10	3	1	1	1	1	0	0	1	0	4	1	2710	2710	2710	2710	146	23	190	59	39	0	0	0	0	0	1	2	1	2000	0	0	0	0
11020202	27311676	31621601	59	0	1	0	0	0	0	38	95	29	95	86	10	11	2	2	1	1	1	1	1	0	0	6	1	266	266	266	266	181	9	235	23	17	0	0	0	0	0	1	2	1	400	0	0	1	0
10942097	25199827	31624579	50	0	0	0	0	0	0	36	68	20	92	87	16	12	1	2	1	1	0	0		0	0	3	1	478	478	478	478	208	104	270	3	2	0	0	0	0	1	0	2	1	400	0	0	1	0
17651038	24599536	31627753	32	0	1	0	0	1	1	37	102	26	93	121	13	10	8	4	1	1	0	0		0	0	7	1	36963	41860	9939	34527	129	78	173	18	7	0	0	0	0	1	1	2	1	2000	0	0	0	0
16097925	20461991	31638539	33	0	0	0	0	1	1	36	108	20	100	66	13	9	4	3	1	1	0	0		0	0	9	1	127	127	127	127	134	78	176	19	9	1	1	1	0	1	1	1	0	200	0	1	0	0
16763139	24759021	31647174	68	1	1	1	0	0	1	38	95	20	96	72	16	8	0	1	1	1	0	0		0	0	3	1	699	699	699	699	112	40	146	6	6	0	0	0	0	0	1	2	1	600	0	0	0	1
16261977	28203598	31654675	70	0	1	1	1	1	1	37	79	24	100	88	25	8	1	4	1	1	0	0		0	0	3	1	124	124	124	124	161	13	209	4	4	1	1	1	1	1	1	1	0	200	0	1	0	0
14903722	23470534	31656499	91	0	0	0	0	1	1	38	88	19	95	73	9	10	3	1	1	1	0	0		0	0	3	1	1673	1673	1673	1673	189	52	246	3	0	0	0	0	0	1	0	2	1	1600	0	0	0	0
18067858	28330158	31657862	61	0	0	1	0	0	1	36	140	20	96	59	7	9	1	1	0	1	0	0		0	0	2	1	871	871	871	871	135	25	176	6	3	0	0	0	0	0	1	2	1	800	0	0	0	0
10896351	21435488	31660060	72	0	1	0	0	1	0	38	65	22	96	66	18	12	3	1	0	0	0	0		0	0	4	1	623	623	623	623	146	9	193	10	10	1	1	1	1	1	1	2	1	600	0	0	0	1
13714256	20672345	31662581	48	0	0	0	0	0	0	38	140	37	93	74	7	13	2	4	1	1	1	1	0	1	1	5	1	487	487	487	487	115	28	150	26	26	0	0	0	0	1	1	2	1	400	0	0	1	0
11648387	20723229	31662969	71	1	0	0	0	0	1	39	112	13	99	86	4	8	1	1	0	1	0	0		0	0	2	1	281	281	234	258	142	41	185	1	1	0	0	0	0	0	0	1	0	200	0	1	0	0
15521319	21153495	31663334	86	0	0	0	0	0	1	35	110	26	97	60	7	12	5	3	1	1	1	1	0	0	0	9	1	989	989	989	989	100	51	134	46	20	0	1	1	0	1	1	2	1	800	0	0	0	0
12132996	21320294	31668353	77	0	0	0	0	1	0	36	74	23	98	61	1	9	2	1	1	1	0	0		0	0	2	1	3907	4537	3907	4143	97	83	126	4	5	1	1	1	1	0	1	2	1	2000	0	0	0	0
15321807	23343052	31670084	36	0	0	1	0	0	1	38	113	16	97	73	4	10	4	1	0	1	0	0		0	0	6	1	1245	1245	1245	1245	104	19	135	21	6	0	0	0	0	0	1	2	1	1200	0	0	0	0
10822906	28411619	31673873	55	0	0	0	0	0	1	38	69	17	94	71	17	10	4	1	1	1	0	0		0	0	3	1	476	476	476	476	117	52	152	9	9	0	0	0	0	0	1	2	1	400	0	0	1	0
18565538	29320104	31679114	66	0	0	1	0	1	1	37	98	20	98	57	30	10	8	4	1	1	0	0		0	0	7	1	704	704	704	704	168	42	218	13	7	0	0	0	0	1	1	2	1	600	0	0	0	1
17316181	22390175	31689230	66	0	0	1	1	1	1	38	73	30	92	80	10	10	7	1	0	0	1	1	0	1	1	12	1	1002	1002	1002	1002	160	52	208	51	50	0	0	0	0	0	1	2	1	1000	0	0	0	0
17276069	27635465	31695091	75	0	1	1	0	1	0	36	112	23	96	66	10	10	4	1	0	1	1	0	0	0	1	7	1	629	629	629	629	161	45	205	14	9	0	0	0	0	0	1	2	1	600	0	0	0	1
16520274	27225300	31706901	41	1	1	0	0	0	1	36	125	21	99	74	2	11	1	3	0	1	0	0		0	0	5	1	1391	1391	1391	1391	139	12	181	28	5	0	0	0	0	1	1	2	1	1200	0	0	0	0
15149135	28351879	31713061	59	0	0	0	0	0	1	39	105	19	94	89	8	9	1	3	0	1	0	0		0	0	7	1	670	670	670	670	61	81	79	18	1	0	1	0	0	0	0	2	1	600	0	0	0	1
14656487	24426643	31713456	61	0	0	0	0	0	1	37	111	12	95	80	10	8	1	1	1	1	1	0	0	0	1	2	1	416	416	416	416	156	10	203	10	3	0	0	0	0	0	0	2	1	400	0	0	1	0
17793030	24110272	31715641	56	0	0	0	0	0	1	38	105	19	97	80	4	9	0	1	1	1	0	0		0	0	4	1	459	459	459	459	94	16	122	14	13	0	0	0	0	1	1	2	1	400	0	0	1	0
11234565	27519004	31719887	53	1	0	0	0	0	1	38	89	15	96	64	7	11	1	1	0	1	0	0		0	0	6	1	261	261	261	261	148	54	194	15	9	0	0	0	0	1	1	1	0	200	0	1	0	0
18779582	25130089	31720499	48	1	0	0	0	0	1	39	121	37	95	61	14	9	2	1	0	1	0	0		0	0	3	1	299	299	299	299	265	19	345	13	8	0	0	0	0	0	0	1	0	200	0	1	0	0
16976073	24933528	31725270	55	1	0	1	0	0	0	37	102	16	98	68	12	8	2	3	1	1	0	0		0	0	6	1	127	127	127	127	202	19	263	5	2	0	0	0	0	1	1	1	0	200	0	1	0	0
19689858	23455133	31731645	53	0	0	0	0	0	1	38	81	17	100	77	29	10	1	1	0	1	0	0		0	0	5	1	591	591	591	591	107	6	139	6	2	0	0	0	0	1	0	2	1	400	0	0	1	0
19747955	28728222	31732032	45	1	0	1	0	0	1	38	78	22	98	62	9	13	1	2	1	1	1	0	0	0	0	5	1	139	139	139	139	137	27	178	26	18	0	0	0	0	0	1	1	0	200	0	1	0	0
18788795	22798677	31734566	64	0	1	0	1	0	1	38	106	17	98	67	9	12	1	2	0	1	1	0	0	0	1	2	1	99	99	99	99	322	21	419	17	2	0	0	0	0	0	0	1	0	200	0	1	0	0
18580594	24968707	31744824	69	0	1	0	0	1	1	37	77	22	94	121	38	11	1	1	0	1	0	0		0	0	2	1	3363	3363	3363	3363	90	45	117	14	5	0	1	0	0	0	0	2	1	2000	0	0	0	0
15387461	22918339	31745657	71	0	1	1	1	1	1	37	58	8	100	66	10	7	5	3	0	0	1	0	1	0	0	3	1	99	99	99	99	266	22	346	27	20	0	0	0	0	1	1	1	0	200	0	1	0	0
19334544	24056908	31748022	70	0	0	0	0	0	1	37	114	24	100	74	9	8	0	1	1	0	1	0	0	0	1	2	1	964	964	964	964	105	29	137	52	52	0	1	1	1	0	1	2	1	800	0	0	0	0
18574954	26594484	31748844	77	0	1	0	1	1	1	36	61	17	100	57	9	9	3	2	0	1	0	0		0	0	2	1	288	288	288	288	191	24	248	3	3	0	1	0	0	0	1	1	0	200	0	1	0	0
11246623	28035915	31758094	23	0	0	0	0	0	0	38	112	32	92	84	5	9	1	1	1	1	0	0		0	0	4	1	896	896	896	896	146	7	190	10	3	0	0	0	0	0	0	2	1	800	0	0	0	0
12419783	25360842	31759239	23	0	0	0	0	0	1	37	87	16	100	74	21	13	2	2	0	1	1	1	0	0	0	6	1	523	523	523	523	135	8	176	10	7	0	0	0	0	1	1	2	1	400	0	0	1	0
17633758	28356083	31761263	28	0	0	0	0	0	0	37	133	34	97	67	8	10	1	1	1	1	0	0		0	0	2	1	191	191	191	191	155	16	202	8	2	0	0	0	0	0	0	2	1	400	0	0	1	0
13093114	23724516	31762339	52	0	1	1	0	1	0	37	140	35	86	60	20	11	2	2	0	1	0	0		0	0	2	1	317	317	317	317	148	12	192	1	1	1	1	1	1	1	1	1	0	200	0	1	0	0
18962777	28878310	31762736	28	0	0	0	0	0	0	36	81	14	100	101	5	12	1	1	0	1	1	0	0	1	0	3	1	493	493	493	493	220	53	286	2	1	0	0	0	0	0	0	2	1	400	0	0	1	0
16484893	25353273	31763581	50	0	0	0	0	0	1	35	83	16	100	66	11	12	1	2	0	0	0	0		0	0	2	1	196	196	196	196	145	24	189	5	3	0	0	0	0	1	1	1	0	200	0	1	0	0
12749689	26468724	31766399	39	0	0	0	0	0	0	37	92	20	95	95	3	13	1	4	0	0	0	0		0	0	3	1	36963	37310	33281	35657	164	274	213	11	7	0	0	0	0	0	1	2	1	2000	0	0	0	0
13985157	22266688	31772872	76	0	0	1	0	1	1	35	63	23	97	79	1	9	3	1	0	1	1	1	0	0	0	4	1	879	879	879	879	109	116	142	23	23	0	0	0	0	1	1	2	1	800	0	0	0	0
15344891	27408595	31773980	80	1	0	0	0	0	1	37	61	11	100	74	9	8	1	3	1	1	1	0	0	1	0	2	1	19305	19305	2143	10724	127	181	153	26	26	1	1	1	1	0	1	2	1	2000	0	0	0	0
13106442	21801920	31775355	48	1	0	0	0	0	0	38	75	16	100	55	10	10	1	1	1	1	0	0		0	0	3	1	390	390	390	390	171	38	222	18	13	0	0	0	0	0	1	2	1	400	0	0	1	0
10946082	26567626	31777308	69	0	1	1	1	0	1	37	133	14	94	94	11	8	3	4	0	1	0	0		0	0	11	1	2371	2371	2371	2371	108	145	140	4	4	1	1	1	1	1	1	2	1	2000	0	0	0	0
18299037	22666355	31779855	62	0	0	1	0	1	0	38	129	23	95	63	7	8	2	2	0	1	0	0		0	0	3	1	1273	1273	1273	1273	107	30	139	23	4	0	1	0	0	0	0	2	1	1200	0	0	0	0
11842519	26100504	31791282	60	0	0	0	0	1	1	38	112	30	97	81	8	9	5	2	1	1	0	0		0	0	5	1	498	596	498	547	127	30	165	22	22	0	0	0	0	0	1	2	1	400	0	0	1	0
18409213	22791112	31791381	55	0	0	0	0	0	1	37	135	20	95	75	10	8	1	2	0	1	0	0		0	0	2	1	185	185	185	185	136	83	177	13	2	1	1	0	0	0	0	1	0	200	0	1	0	0
10367216	26423670	31806442	39	0	0	0	0	1	1	38	104	22	98	49	9	8	8	1	0	1	0	0		0	0	3	1	819	819	819	819	207	28	269	5	4	0	0	0	0	0	1	2	1	800	0	0	0	0
11960875	29642290	31807246	85	0	0	1	0	1	0	36	75	13	100	67	6	8	1	2	1	1	0	0		0	0	4	1	17	17	17	17	297	42	386	4	1	0	0	0	0	0	0	1	0	200	0	1	0	0
10438951	22568401	31810165	92	0	1	0	1	1	1	37	91	30	96	81	9	7	5	2	1	1	1	0	1	0	1	4	1	203	203	203	203	199	30	259	28	11	0	0	0	0	0	1	2	1	400	0	0	1	0
13745925	21028011	31811599	76	0	1	0	0	0	1	36	80	9	98	65	15	10	1	1	1	1	1	1	1	0	0	2	1	46	46	46	46	243	75	316	5	5	0	0	0	0	0	0	1	0	200	0	1	0	0
10132888	21293774	31822561	90	0	1	0	0	1	1	37	98	21	96	51	14	8	2	1	0	1	0	0		0	0	4	1	88	88	88	88	172	13	224	27	11	0	0	0	0	0	1	1	0	200	0	1	0	0
10952678	29669406	31831287	36	0	0	0	0	1	1	39	125	20	96	47	8	12	5	2	0	1	1	0	0	0	1	6	1	6565	6565	6565	6565	138	33	179	20	10	0	0	0	0	1	1	2	1	2000	0	0	0	0
16624205	23962991	31832021	44	0	0	1	0	0	1	36	81	24	91	54	6	6	3	4	1	1	1	1	1	0	0	3	1	12992	12992	12992	12992	122	90	156	43	23	0	0	0	0	1	1	2	1	2000	0	0	0	0
13246756	21008075	31838913	34	1	0	0	0	0	1	38	111	13	94	93	21	10	1	3	1	1	0	0		0	0	6	1	289	289	289	289	163	191	212	4	4	1	1	1	1	0	1	2	1	400	0	0	1	0
10125241	25625835	31842545	44	1	0	0	0	0	1	38	104	20	98	74	7	8	3	3	1	1	0	0		0	0	2	1	1107	1107	1107	1107	139	13	181	11	1	0	0	0	0	0	0	2	1	1000	0	0	0	0
15179083	23597615	31847679	61	0	0	0	0	0	1	35	51	13	100	62	9	12	1	2	1	1	1	0	0	1	0	12	1	336	336	336	336	134	164	174	35	7	0	0	0	0	1	1	2	1	400	0	0	1	0
19103929	22425022	31859355	78	1	1	0	0	0	1	38	81	12	92	77	7	8	1	1	1	1	0	0		0	0	3	1	259	259	259	259	244	27	317	20	13	0	0	0	0	0	1	2	1	400	0	0	1	0
16302207	28623079	31859365	70	1	0	0	0	0	0	38	99	24	97	71	5	10	1	2	0	1	1	1	0	0	1	3	1	1993	1993	1993	1993	135	43	177	26	26	0	0	0	0	1	1	2	1	1800	0	0	0	0
15327821	20748538	31862912	82	0	0	0	0	0	0	38	54	12	99	76	12	9	2	2	0	1	0	0		0	0	5	1	154	154	154	154	153	58	199	3	3	1	1	1	1	1	1	1	0	200	0	1	0	0
16420285	24632519	31865639	64	0	0	0	0	1	0	39	75	30	100	74	7	8	2	1	0	0	0	0		0	0	5	1	846	846	846	846	135	57	176	16	14	1	1	1	1	1	1	2	1	800	0	0	0	0
19765086	29308745	31869180	29	0	0	0	0	0	1	37	140	30	86	74	16	11	1	4	0	1	0	0		0	0	8	1	486	486	486	486	109	13	142	21	16	0	0	0	0	1	1	2	1	400	0	0	1	0
16828034	22414754	31872514	53	1	0	0	0	0	0	36	119	22	94	78	4	8	0	2	0	1	1	1	0	0	1	6	1	1199	1199	955	1077	168	13	104	65	35	0	0	0	0	0	1	2	1	1000	0	0	0	0
11085838	26892203	31877273	74	0	0	0	0	0	1	38	120	25	97	60	14	8	1	1	1	0	0	0		0	0	2	1	70	78	70	74	297	26	407	30	29	0	1	0	0	0	1	1	0	200	0	1	0	0
16581134	23417684	31883804	70	0	0	1	0	1	1	37	107	11	97	75	13	7	6	2	1	0	0	0		0	0	8	1	623	623	623	623	137	87	174	17	8	0	1	0	0	1	1	2	1	600	0	0	0	1
13804231	25773534	31885114	68	0	0	1	0	0	1	36	61	14	100	57	6	10	3	2	0	0	1	1	1	1	0	6	1	1792	1792	1136	1464	129	38	122	98	46	0	0	0	0	0	1	2	1	1600	0	0	0	0
16339504	25997460	31888989	81	0	0	0	0	0	1	37	106	24	97	69	4	10	1	1	1	1	0	0		0	0	2	1	2017	2017	2017	2017	136	19	177	5	1	0	0	0	0	0	0	2	1	2000	0	0	0	0
14147386	24957440	31893551	82	0	1	0	0	1	1	36	77	13	99	66	5	8	2	2	1	1	0	0		0	0	3	1	111	111	111	111	308	74	400	9	1	0	1	0	0	0	0	1	0	200	0	1	0	0
16614887	26022203	31894501	81	0	1	1	0	1	1	36	83	33	89	72	7	8	2	2	1	1	0	0		0	0	3	1	55	55	55	55	258	25	335	16	2	0	0	0	0	0	1	1	0	200	0	1	0	0
19235898	28006620	31895102	70	0	0	0	0	0	0	37	81	8	100	65	21	10	1	3	0	1	0	0		0	0	8	1	8117	8117	8117	8117	86	150	112	3	2	1	1	1	1	1	1	2	1	2000	0	0	0	0
14555029	21995659	31895739	60	1	0	0	0	0	0	36	63	24	94	76	16	13	5	3	0	1	0	0		0	0	4	1	411	411	411	411	126	68	166	22	2	0	0	0	0	1	1	2	1	400	0	0	1	0
12444275	20076874	31896252	78	1	0	0	0	0	1	37	94	28	92	65	21	8	1	1	0	1	0	0		0	0	2	1	1301	1301	1301	1301	168	36	218	14	6	1	1	1	0	0	1	2	1	1200	0	0	0	0
10337260	23891215	31902530	22	0	0	0	0	0	1	37	106	21	100	73	22	10	1	1	1	1	0	0		0	0	4	1	111	111	111	111	153	8	199	4	2	0	0	0	0	1	0	1	0	200	0	1	0	0
19083332	29042389	31908710	87	0	1	0	1	1	1	37	62	14	92	80	8	10	1	1	0	0	0	0		0	0	2	1	306	306	306	306	167	52	217	5	3	0	0	0	0	0	0	1	0	200	0	1	0	0
19368129	23705986	31911210	54	0	0	0	0	0	1	36	53	19	100	53	10	7	1	3	0	1	0	0		0	0	10	1	545	545	545	545	140	142	182	2	3	1	1	1	1	1	1	2	1	400	0	0	1	0
18557437	27303530	31921426	37	0	0	0	0	0	1	37	77	22	95	81	18	10	1	1	0	1	1	1	0	0	0	3	1	59	59	59	59	281	19	365	19	15	0	0	0	0	0	1	1	0	200	0	1	0	0
14823207	21959718	31921787	46	1	0	0	0	0	0	34	81	18	100	95	2	9	1	3	0	1	0	0		0	0	6	1	63	277	63	170	116	83	151	13	9	0	0	0	0	1	1	1	0	200	0	1	0	0
11752559	26383749	31927679	80	0	0	1	0	0	1	38	106	32	96	71	17	9	1	2	1	0	1	0	0	0	1	9	1	495	495	495	495	244	49	317	28	18	0	0	0	0	1	1	2	1	400	0	0	1	0
12014968	20449658	31929757	64	0	1	0	1	1	1	37	115	19	97	81	17	10	3	2	1	0	0	0		0	0	2	1	367	367	367	367	112	28	146	8	2	0	0	0	0	0	0	2	1	400	0	0	1	0
18036814	24545441	31931157	64	0	0	0	0	0	0	37	134	37	94	90	16	13	2	2	0	0	1	0	1	1	0	3	1	561	561	561	561	124	26	161	18	4	0	0	0	0	0	1	2	1	400	0	0	1	0
18142938	27388395	31931655	33	0	0	0	0	0	0	38	93	27	97	82	16	10	3	2	0	1	0	0		0	0	6	1	420	420	420	420	167	10	217	7	1	0	0	0	0	0	0	2	1	400	0	0	1	0
16760130	23648003	31931703	64	1	0	1	0	0	1	37	85	14	94	66	3	9	1	1	1	1	0	0		0	0	2	1	60	60	60	60	291	26	378	3	1	0	0	0	0	0	0	1	0	200	0	1	0	0
16251768	29699371	31932450	62	0	1	0	0	0	1	37	105	21	95	98	4	6	1	1	1	1	0	0		0	0	3	1	2900	2900	2900	2900	222	675	289	4	2	0	0	0	0	0	0	2	1	2000	0	0	0	0
17090741	21586795	31933355	60	1	0	0	1	0	0	37	75	19	96	62	24	8	1	2	0	1	0	0		0	0	3	1	1020	1020	1020	1020	157	16	204	9	4	0	1	0	0	1	1	2	1	1000	0	0	0	0
17164850	29213433	31933880	65	0	0	0	0	1	1	39	98	22	100	115	11	9	2	1	0	0	0	0		0	0	2	1	251	251	251	251	224	69	291	6	1	0	0	0	0	0	0	1	0	200	0	1	0	0
15656258	24272744	31935140	98	1	0	1	0	0	1	37	59	18	99	65	5	11	1	1	0	1	0	0		0	0	2	1	34	34	34	34	162	41	211	2	2	1	1	1	1	0	0	1	0	200	0	1	0	0
17091912	29072017	31942163	63	0	0	0	0	0	1	36	128	37	91	66	15	8	1	3	1	1	0	0		0	0	2	1	146	146	146	146	112	67	146	1	1	1	1	1	1	1	0	1	0	200	0	1	0	0
18017335	29926463	31945426	65	1	0	0	0	0	1	36	124	19	97	64	10	13	2	3	1	1	1	0	0	0	1	7	1	79	79	79	79	238	53	309	32	21	0	0	0	0	1	1	1	0	200	0	1	0	0
17415921	29055596	31946853	35	0	0	0	0	0	1	38	116	17	99	75	39	9	1	4	1	0	0	0		0	0	4	1	67	67	67	67	220	8	286	7	4	0	0	0	0	1	1	1	0	200	0	1	0	0
18658482	26567998	31947752	69	0	0	0	0	1	1	37	103	17	97	72	4	10	1	1	0	1	0	0		0	0	4	1	232	232	232	232	128	19	166	18	10	0	0	0	0	0	1	1	0	200	0	1	0	0
10516440	25650059	31948538	57	0	0	0	0	0	1	36	84	18	98	101	12	12	1	1	0	1	0	0		0	0	2	1	455	455	455	455	128	87	166	18	18	0	0	0	0	0	0	2	1	400	0	0	1	0
17029638	23163098	31952745	85	1	0	1	0	0	1	38	83	17	100	52	1	9	1	1	1	0	0	0		0	0	5	1	656	656	656	656	145	38	184	15	7	0	0	0	0	0	1	2	1	600	0	0	0	1
16359089	23982922	31959191	65	1	0	0	0	0	0	37	93	18	99	104	13	9	1	1	0	1	0	0		0	0	3	1	505	505	505	505	156	17	203	11	5	1	1	0	0	0	1	2	1	400	0	0	1	0
10607310	26504560	31959952	52	0	0	0	0	0	1	37	71	8	98	111	12	9	8	2	0	1	0	0		0	0	5	1	704	704	704	704	146	167	190	11	2	0	0	0	0	0	1	2	1	600	0	0	0	1
16923929	27507149	31961399	27	0	0	0	0	0	1	34	65	15	100	98	5	7	1	4	0	1	1	0	1	0	0	3	1	526	526	526	526	48	17	144	102	26	0	0	0	0	0	1	2	1	400	0	0	1	0
12398260	29103759	31962560	46	0	0	0	0	1	1	37	65	14	100	106	1	9	2	1	1	0	0	0		0	0	3	1	507	507	507	507	110	19	143	12	4	0	0	0	0	0	0	2	1	400	0	0	1	0
17754292	21154747	31972580	75	0	0	0	0	0	1	38	66	25	96	51	5	10	1	2	1	1	0	0		0	0	4	1	973	973	973	973	113	12	147	4	2	0	0	0	0	0	0	2	1	800	0	0	0	0
13808136	26406341	31981888	82	1	0	0	0	0	1	37	87	16	100	74	6	10	1	1	1	1	1	1	0	0	1	2	1	320	320	320	320	145	15	189	27	21	0	0	0	0	0	1	2	1	400	0	0	1	0
17156155	21844115	31983052	28	0	0	0	0	0	1	37	70	16	100	76	15	11	1	1	0	1	1	1	0	0	1	2	1	282	282	282	282	275	69	358	54	54	0	0	0	0	0	1	1	0	200	0	1	0	0
18837107	28064324	31983116	21	1	0	0	0	0	1	37	105	33	99	54	40	11	3	3	1	1	1	0	0	0	1	6	1	411	411	411	411	131	42	170	24	17	0	0	0	0	1	1	2	1	400	0	0	1	0
10094811	28336192	31983721	61	0	1	1	0	1	0	36	58	14	90	76	9	9	8	3	0	0	0	0		0	0	5	1	2338	2338	2338	2338	136	70	177	8	4	0	0	0	0	0	1	2	1	2000	0	0	0	0
12176298	29725203	31984434	79	1	0	0	0	0	1	37	86	16	100	67	14	9	1	4	1	0	1	1	0	0	1	3	1	1144	1144	1144	1144	135	17	176	30	30	0	0	0	0	0	1	2	1	1000	0	0	0	0
16324879	24928156	31984618	27	0	0	0	0	0	1	38	113	22	97	58	16	10	1	1	1	0	0	0		0	0	4	1	394	394	394	394	151	44	197	7	4	0	0	0	0	1	0	2	1	400	0	0	1	0
15453014	21118860	31984718	51	1	0	1	0	0	1	37	69	9	99	103	9	12	1	1	0	0	1	0	0	0	1	2	1	479	479	479	479	199	26	259	8	1	0	0	0	0	0	0	2	1	400	0	0	1	0
10240592	21268381	31988980	89	0	1	0	0	1	1	34	58	10	96	84	7	9	4	1	1	1	1	0	1	0	0	8	1	408	408	408	408	192	35	250	45	6	0	0	0	0	1	1	2	1	400	0	0	1	0
17684936	27092880	32006558	83	0	0	0	0	1	0	37	69	14	95	63	17	10	2	1	1	1	0	0		0	0	4	1	68	68	68	68	146	12	190	4	2	0	0	0	0	1	0	1	0	200	0	1	0	0
13108883	25372232	32007747	57	0	1	1	1	1	1	36	63	16	100	84	7	9	6	1	0	1	1	0	0	0	1	3	1	482	482	482	482	127	96	165	7	5	0	0	0	0	1	1	2	1	400	0	0	1	0
18374909	25761615	32008152	69	1	0	0	0	0	1	37	79	30	97	82	6	10	1	1	0	1	0	0		0	0	3	1	63	63	63	63	193	39	251	7	1	0	0	0	0	0	0	1	0	200	0	1	0	0
17961555	22879995	32009796	61	0	0	0	0	0	1	36	74	28	98	58	12	9	0	1	1	1	0	0		0	0	4	1	520	520	520	520	161	41	210	16	13	1	1	0	0	1	0	2	1	400	0	0	1	0
11017644	21621302	32016049	68	0	0	0	1	0	1	36	97	18	100	69	6	10	0	3	1	1	0	0		0	0	3	1	417	417	307	362	162	23	212	21	14	0	0	0	0	0	1	2	1	400	0	0	1	0
16130527	21738352	32021026	87	0	1	0	0	1	1	37	49	13	99	54	10	11	3	2	0	1	0	0		0	0	3	1	164	164	164	164	265	33	345	6	3	0	0	0	0	1	1	1	0	200	0	1	0	0
19408525	27839048	32025136	77	1	0	0	0	0	0	37	72	16	91	94	12	9	1	2	0	0	0	0		0	0	2	1	268	268	268	268	152	21	198	15	12	0	0	0	0	0	1	1	0	200	0	1	0	0
12612603	21332395	32030316	56	0	1	1	1	0	1	37	103	20	95	91	18	9	1	1	0	1	1	0	0	1	0	4	1	860	860	860	860	176	45	229	53	26	0	0	0	0	0	1	2	1	800	0	0	0	0
14618984	27226271	32038145	81	1	1	0	1	0	1	37	87	17	98	54	7	9	1	1	1	1	0	0		0	0	2	1	127	127	127	127	94	9	122	15	2	0	1	0	0	0	1	1	0	200	0	1	0	0
13755940	23938680	32046854	92	1	1	1	1	0	0	36	63	25	100	68	10	8	2	4	1	1	0	0		0	0	3	1	72	72	72	72	254	15	330	9	9	0	0	0	0	1	1	1	0	200	0	1	0	0
12114593	26852696	32051826	57	1	0	0	0	0	1	37	95	21	95	67	11	10	1	2	0	1	0	0		0	0	5	1	1574	1574	1574	1574	116	82	151	1	1	0	0	0	0	0	0	2	1	1400	0	0	0	0
10853896	23383004	32052866	71	0	1	1	1	0	1	37	83	18	96	61	19	8	2	2	1	1	0	0		0	0	6	1	121	121	121	121	276	12	359	12	8	0	0	0	0	1	1	1	0	200	0	1	0	0
14570287	24502534	32059124	73	1	1	0	1	0	1	36	107	20	98	68	13	7	1	2	0	0	0	0		0	0	2	1	379	379	379	379	88	8	114	26	3	0	0	0	0	1	1	1	0	200	0	1	0	0
13155922	23957226	32063801	27	0	0	0	0	0	1	38	113	24	97	79	7	16	1	2	0	1	1	0	0	0	1	2	1	694	694	694	694	87	12	113	36	11	0	0	0	0	0	1	2	1	600	0	0	0	1
16728570	29740424	32068918	36	0	0	1	0	0	1	38	92	20	97	115	11	8	2	2	0	0	1	0	0	0	1	2	1	59	59	59	59	146	52	190	37	3	0	0	0	0	0	1	1	0	200	0	1	0	0
18737673	29105226	32070739	21	0	0	0	0	0	0	37	84	20	100	89	9	11	1	2	1	1	1	1	0	0	0	3	1	819	819	819	819	164	44	213	17	4	0	0	0	0	1	1	2	1	800	0	0	0	0
14516348	29429159	32075128	67	0	0	0	0	0	1	37	91	17	95	60	7	8	1	2	0	1	1	0	0	1	0	2	1	2079	2079	2079	2079	139	43	181	148	21	0	0	0	0	1	1	2	1	2000	0	0	0	0
10822194	25491134	32080620	86	0	1	0	1	0	0	37	60	13	100	70	8	11	1	1	1	1	1	0	0	0	1	3	1	283	337	283	310	114	36	148	28	28	0	0	0	0	1	1	2	1	400	0	0	1	0
16270594	24510998	32085993	22	0	0	0	0	0	0	34	115	34	93	75	1	7	3	3	0	1	1	0	0	1	0	11	1	1855	1855	1855	1855	85	25	111	0	0	1	1	1	1	1	0	2	1	1800	0	0	0	0
12462675	23181629	32086796	62	0	0	0	0	0	0	37	71	15	100	71	14	12	1	3	0	1	1	1	0	0	0	2	1	386	386	386	386	209	58	272	25	24	0	0	0	0	0	1	1	0	200	0	1	0	0
12155030	22956682	32090389	21	0	0	0	0	0	1	37	137	37	92	84	19	8	1	2	1	1	0	0		0	0	3	1	11932	11932	11892	11912	131	21	170	10	3	0	0	0	0	0	1	2	1	2000	0	0	0	0
18418794	21108317	32091273	53	1	0	0	1	0	0	37	111	18	95	85	13	10	2	1	0	1	0	0		0	0	4	1	2934	2934	2934	2934	148	46	193	16	4	0	0	0	0	0	1	2	1	2000	0	0	0	0
17607503	24750320	32096308	51	1	0	0	0	0	0	36	105	23	98	69	2	9	0	1	0	1	0	0		0	0	3	1	863	863	592	685	103	40	173	16	14	0	0	0	0	0	1	2	1	800	0	0	0	0
17944369	20578248	32097051	64	0	1	0	0	0	1	37	76	13	98	61	9	7	1	1	1	0	1	0	0	0	0	2	1	170	170	170	170	39	53	51	23	3	0	1	0	0	1	1	2	1	400	0	0	1	0
11127127	27797071	32117398	91	0	1	1	1	1	1	35	66	18	100	68	16	8	4	2	1	0	0	0		0	0	4	1	10135	10135	10135	10135	94	124	122	12	4	0	0	0	0	1	1	2	1	2000	0	0	0	0
12199686	21122452	32118372	51	1	0	1	0	0	0	37	110	16	96	60	13	14	1	2	1	1	1	1	0	0	0	4	1	507	507	507	507	94	70	122	28	28	0	1	0	0	0	1	2	1	400	0	0	1	0
13961294	26702852	32120110	72	0	1	1	1	1	0	37	101	25	94	105	14	12	2	3	1	1	1	1	1	0	0	2	1	3115	3115	3115	3115	111	17	144	24	5	0	0	0	0	1	1	2	1	2000	0	0	0	0
16766006	25906030	32120130	54	0	1	0	0	0	1	37	78	24	97	84	11	11	1	1	0	1	0	0		0	0	4	1	552	552	552	552	197	64	256	18	5	0	0	0	0	0	1	2	1	400	0	0	1	0
14878680	29469151	32127509	86	1	0	0	0	0	0	37	77	12	99	50	17	10	1	1	1	1	0	0		0	0	5	1	358	358	358	358	109	43	138	31	31	0	1	0	0	1	1	2	1	400	0	0	1	0
15032392	27673498	32132708	59	1	0	1	0	0	1	37	117	17	91	73	13	8	2	2	1	1	1	0	1	0	0	6	1	68	68	68	68	174	82	226	25	3	0	0	0	0	0	1	1	0	200	0	1	0	0
13278611	22674134	32133554	43	0	0	0	0	0	0	38	105	25	98	55	9	10	1	2	1	1	0	0		0	0	4	1	45	45	45	45	166	64	218	4	3	0	0	0	0	1	0	1	0	200	0	1	0	0
15408126	27915700	32133698	80	1	0	0	0	0	0	36	132	8	100	55	20	9	1	3	0	1	1	1	0	0	0	3	1	516	516	516	516	83	9	108	30	10	0	0	0	0	1	1	2	1	400	0	0	1	0
14474896	25443284	32137361	41	0	0	0	0	0	1	38	105	18	97	66	13	9	1	1	0	1	1	0	0	0	1	4	1	536	814	536	675	99	10	129	10	5	0	0	0	0	0	1	2	1	400	0	0	1	0
12329981	28194688	32137687	51	1	0	0	1	0	1	38	105	26	96	73	8	10	1	2	0	1	1	0	0	0	1	7	1	582	582	582	582	125	128	163	30	1	0	0	0	0	0	0	2	1	400	0	0	1	0
19723798	26593663	32137898	53	1	1	1	1	0	1	36	83	17	100	51	11	9	3	2	0	0	1	1	0	1	1	9	1	302	302	302	302	157	19	204	45	45	0	0	0	0	1	1	1	0	200	0	1	0	0
18695674	22532489	32139437	81	1	1	0	1	0	0	37	104	27	100	61	9	9	1	1	0	0	0	0		0	0	2	1	18	18	18	18	263	15	342	2	1	0	0	0	0	0	0	0	0	0	1	0	0	0
17559795	25283300	32141930	78	0	0	1	0	1	1	38	100	12	100	64	19	8	2	1	0	1	0	0		0	0	3	1	795	795	795	795	119	58	155	19	12	0	0	0	0	0	0	2	1	600	0	0	0	1
10645926	29128992	32142799	46	0	0	0	0	0	0	37	123	31	94	66	19	9	5	4	1	1	1	1	1	0	0	9	1	327	327	327	327	175	49	228	22	10	0	0	0	0	1	1	2	1	400	0	0	1	0
13059823	21714112	32142843	75	0	0	0	1	0	1	37	64	22	97	75	11	9	8	1	0	1	0	0		0	0	4	1	26	26	26	26	177	44	230	5	2	0	0	0	0	0	0	0	0	0	1	0	0	0
19940147	29892428	32144801	59	1	0	0	0	0	1	37	98	15	100	112	14	8	0	1	1	1	0	0		0	0	2	1	5811	5811	5811	5811	131	160	170	14	14	0	0	0	0	0	1	2	1	2000	0	0	0	0
15813004	21865103	32145199	69	0	1	0	0	1	1	37	95	30	95	79	14	12	4	2	0	1	1	0	1	0	0	2	1	1547	1547	1547	1547	107	18	139	27	8	0	0	0	0	0	1	2	1	1400	0	0	0	0
15586468	25906572	32145218	59	1	0	1	0	0	0	36	98	9	94	75	9	11	3	2	0	1	0	0		0	0	4	1	5857	5857	5857	5857	126	77	159	21	1	1	1	1	1	0	1	2	1	2000	0	0	0	0
18520455	25408103	32146543	63	0	1	0	0	1	0	36	111	12	99	54	6	11	1	1	0	1	1	1	0	0	0	5	1	255	255	135	195	171	30	222	26	22	0	0	0	0	1	1	1	0	200	0	1	0	0
15664318	21206710	32147981	44	0	0	1	0	1	0	38	98	24	100	80	16	10	5	2	1	1	1	1	0	1	0	3	1	590	590	590	590	125	46	163	30	30	0	0	0	0	1	1	2	1	400	0	0	1	0
10810063	20573862	32154233	22	0	0	0	0	0	1	37	90	8	98	68	8	9	0	1	1	1	1	1	0	0	1	2	1	288	288	288	288	190	78	247	8	5	0	0	0	0	0	0	2	1	400	0	0	1	0
19484871	28653781	32157105	52	0	1	0	0	0	1	37	92	19	97	91	12	9	1	2	1	1	0	0		0	0	7	1	749	749	749	749	123	55	160	5	3	0	0	0	0	1	1	2	1	600	0	0	0	1
16976054	24639955	32174279	71	1	0	0	1	0	1	37	73	18	94	73	4	8	1	1	0	1	0	0		0	0	2	1	529	529	529	529	157	29	204	8	1	0	0	0	0	0	0	2	1	400	0	0	1	0
11231966	22679034	32176417	76	0	1	0	1	0	0	38	76	24	98	80	12	12	1	3	0	1	0	0		0	0	5	1	271	271	271	271	164	51	213	6	4	0	0	0	0	1	1	1	0	200	0	1	0	0
11705775	29272550	32178014	60	1	0	0	0	0	0	37	111	21	97	66	15	14	1	1	0	1	0	0		0	0	3	1	674	674	674	674	156	41	204	8	4	0	0	0	0	1	1	2	1	600	0	0	0	1
15426838	27247343	32182830	83	0	0	0	1	1	0	37	74	27	92	68	9	13	1	2	1	1	1	1	1	0	0	2	1	199	199	199	199	183	39	238	22	23	1	1	1	1	0	1	2	1	400	0	0	1	0
15465066	20295228	32187876	62	0	0	1	0	0	1	37	82	15	97	98	15	13	2	1	0	1	1	0	1	0	1	3	1	957	957	957	957	137	24	178	21	5	0	0	0	0	0	1	2	1	800	0	0	0	0
10942537	23159420	32188573	72	0	1	0	0	0	0	39	109	24	86	61	4	8	2	2	0	1	0	0		0	0	3	1	36963	41860	33281	35657	155	50	203	20	12	0	0	0	0	1	1	2	1	2000	0	0	0	0
16268804	29219847	32194397	67	0	1	1	0	1	1	34	62	22	97	67	10	6	8	2	0	1	0	0		0	0	9	1	577	577	398	466	130	98	172	17	9	0	1	0	0	0	1	2	1	400	0	0	1	0
16795519	27238334	32196175	76	0	1	0	0	1	0	38	79	14	96	109	10	12	2	1	1	1	0	0		0	0	5	1	551	551	551	551	173	91	225	16	9	0	0	0	0	0	1	2	1	400	0	0	1	0
18391972	20535558	32201021	56	0	1	0	0	0	1	37	81	32	97	90	8	10	1	2	1	1	0	0		0	0	2	1	130	130	130	130	193	45	251	17	17	0	0	0	0	0	1	1	0	200	0	1	0	0
19881444	22660531	32203117	62	0	0	0	0	0	1	37	72	18	97	70	9	11	1	1	1	1	0	0		0	0	3	1	350	350	350	350	159	18	207	2	1	0	0	0	0	0	0	2	1	400	0	0	1	0
17551799	20078746	32204835	72	0	1	1	1	1	1	37	133	19	100	55	21	10	2	2	1	0	1	0	1	1	0	2	1	767	767	767	767	112	21	146	25	7	0	0	0	0	1	1	2	1	600	0	0	0	1
15771672	25737679	32205978	91	1	1	0	0	0	0	37	89	24	98	121	11	7	1	3	1	1	0	0		0	0	2	1	6014	6014	6014	6014	116	84	151	5	4	1	1	1	1	0	1	2	1	2000	0	0	0	0
19378973	24682145	32213782	46	0	1	1	1	0	1	38	120	30	96	111	33	12	1	4	0	1	0	0		0	0	9	1	717	717	717	717	163	34	208	13	12	1	1	1	1	1	1	2	1	600	0	0	0	1
15681270	23134028	32214650	76	0	0	0	1	1	0	37	80	16	98	62	11	9	2	1	0	0	0	0		0	0	4	1	395	395	395	395	130	12	169	9	6	0	0	0	0	0	1	1	0	200	0	1	0	0
11234995	20603467	32217866	64	1	1	0	0	0	0	37	89	21	100	101	15	10	1	2	0	1	0	0		0	0	2	1	629	629	629	629	176	58	229	16	9	0	0	0	0	0	1	2	1	600	0	0	0	1
19277757	28945718	32218208	86	0	0	0	0	0	0	36	89	28	98	55	32	10	2	1	0	1	0	0		0	0	4	1	866	866	866	866	76	41	99	17	17	1	1	1	1	1	1	2	1	800	0	0	0	0
19672997	21422707	32220056	66	0	0	0	0	0	1	36	127	23	94	88	5	8	2	3	1	1	1	1	1	0	1	3	1	7758	7758	7758	7758	100	33	130	37	5	0	1	1	0	1	1	2	1	2000	0	0	0	0
14504000	28701176	32226062	57	0	0	1	0	0	0	36	99	20	97	73	14	11	1	1	0	1	1	1	0	0	0	8	1	127	127	127	127	224	34	291	14	9	0	0	0	0	1	1	1	0	200	0	1	0	0
15775419	22908667	32228993	50	0	0	0	0	0	1	36	50	14	100	81	5	10	1	1	0	1	0	0		0	0	2	1	340	340	340	340	161	17	209	12	6	1	1	1	0	0	0	1	0	200	0	1	0	0
10361825	24280225	32232273	55	1	0	1	1	0	0	37	102	34	99	86	9	9	1	1	0	1	1	0	0	0	1	5	1	1050	1050	1050	1050	136	56	177	38	6	0	0	0	0	0	1	2	1	1000	0	0	0	0
16920541	20239209	32233140	65	1	0	0	0	0	1	37	74	22	100	101	14	8	1	2	1	1	0	0		0	0	6	1	360	360	360	360	131	6	170	5	2	0	0	0	0	1	0	2	1	400	0	0	1	0
14305936	21611859	32234904	41	0	0	0	0	0	0	39	103	21	100	66	5	8	1	3	1	1	0	0		0	0	2	1	36963	41860	25746	35657	80	100	108	14	9	1	1	1	0	0	1	2	1	2000	0	0	0	0
12662773	20446083	32238735	70	1	0	0	0	0	1	38	118	35	100	77	25	9	1	1	1	0	1	0	1	0	1	4	1	1687	1878	975	1495	97	31	99	61	39	0	0	0	0	0	1	2	1	1600	0	0	0	0
14637872	22287157	32239536	48	0	0	0	0	0	0	37	127	11	97	78	2	8	1	4	1	1	1	0	0	0	0	6	1	687	1170	687	912	136	175	177	31	5	0	0	0	0	0	1	2	1	600	0	0	0	1
19141642	27774278	32244419	67	1	0	0	0	0	1	36	77	25	92	92	39	8	1	2	1	1	0	0		0	0	4	1	36963	41860	33281	35657	122	259	159	12	1	0	0	0	0	0	0	2	1	2000	0	0	0	0
16572145	21635344	32253926	54	1	0	0	0	0	1	36	95	15	95	84	10	10	1	2	0	1	0	0		0	0	3	1	1686	1686	1686	1686	99	124	129	11	1	1	1	0	0	0	1	2	1	1600	0	0	0	0
16259761	24236746	32255210	64	0	0	0	0	0	0	37	72	11	100	75	11	10	1	2	1	1	0	0		0	0	2	1	116	116	116	116	180	20	234	1	2	1	1	1	1	0	0	1	0	200	0	1	0	0
10222191	27488620	32259031	77	1	0	0	0	0	0	37	135	15	94	66	13	11	6	1	0	1	1	1	0	0	1	5	1	2352	2352	2352	2352	71	13	92	67	68	0	1	1	1	1	1	2	1	2000	0	0	0	0
12133624	21052892	32269247	19	0	1	0	0	0	1	38	111	37	99	88	7	11	1	2	1	1	0	0		0	0	2	1	412	412	412	412	128	10	166	9	3	0	0	0	0	0	0	2	1	400	0	0	1	0
17137598	28674715	32270222	83	0	0	1	1	0	0	36	75	21	88	64	3	9	1	1	0	1	0	0		0	0	2	1	358	358	358	358	173	45	218	18	1	0	1	0	0	0	1	1	0	200	0	1	0	0
17906556	20149440	32285218	63	0	0	0	0	0	1	37	73	17	100	82	8	9	1	1	0	1	0	0		0	0	4	1	539	539	539	539	162	48	211	5	3	0	0	0	0	1	0	2	1	400	0	0	1	0
15083733	22961090	32293675	52	1	0	0	0	0	1	36	124	18	98	57	17	9	2	4	0	1	1	1	0	0	0	3	1	1511	1511	1511	1511	136	78	179	15	12	0	0	0	0	0	1	2	1	1400	0	0	0	0
18561312	29204631	32295344	57	0	0	1	0	0	1	39	140	22	100	54	3	10	1	3	1	1	1	0	1	1	0	8	1	1464	1464	1464	1464	152	18	198	4	4	1	1	1	1	1	1	2	1	1400	0	0	0	0
13476625	22578348	32314720	80	0	0	1	0	0	1	36	74	12	100	82	10	9	1	2	0	0	0	0		0	0	2	1	503	503	503	503	136	16	177	10	5	0	0	0	0	0	1	2	1	400	0	0	1	0
18514963	25132403	32315813	77	0	0	0	0	0	1	36	82	30	99	62	13	8	1	2	1	1	0	0		0	0	3	1	201	201	201	201	147	58	191	14	13	1	1	1	1	1	1	2	1	400	0	0	1	0
15416400	21051906	32317492	58	1	0	0	0	0	0	37	53	10	100	63	19	9	2	2	1	1	0	0		0	0	11	1	6351	6351	6351	6351	95	98	128	2	2	1	1	1	1	1	1	2	1	2000	0	0	0	0
16976998	20034762	32324096	85	1	0	1	0	0	1	37	78	19	99	46	13	12	1	3	1	1	0	0		0	0	4	1	1266	1266	1266	1266	187	118	243	12	8	0	0	0	0	0	1	2	1	1200	0	0	0	0
11240116	25225736	32326179	41	0	0	0	0	0	0	38	66	19	98	93	10	14	1	1	0	1	0	0		0	0	2	1	722	722	722	722	199	82	259	4	2	0	0	0	0	0	0	2	1	600	0	0	0	1
10534245	22320526	32333965	44	0	1	0	0	1	1	37	100	22	99	96	8	12	4	2	0	1	0	0		0	0	7	1	69	69	69	69	167	25	220	63	10	0	1	0	0	0	1	1	0	200	0	1	0	0
19477649	28971647	32341058	62	1	0	1	0	0	0	37	70	10	97	84	11	7	1	1	1	0	1	0	0	1	0	3	1	1925	1925	1542	1646	182	64	230	77	3	0	0	0	0	0	0	2	1	1800	0	0	0	0
10532095	24112824	32344219	51	0	0	0	0	0	1	37	93	22	95	78	11	7	2	3	0	1	0	0		0	0	2	1	426	426	426	426	107	100	139	21	10	0	1	0	0	0	1	2	1	400	0	0	1	0
14357724	23836412	32347022	48	1	1	1	0	0	0	37	109	20	95	80	10	11	1	1	1	1	0	0		0	0	2	1	124	124	124	124	126	17	164	11	5	0	0	0	0	0	0	1	0	200	0	1	0	0
10858147	22389396	32347409	48	0	0	0	0	1	0	37	85	15	100	81	14	13	8	1	0	0	1	1	0	0	1	4	1	606	606	606	606	119	49	155	60	60	0	0	0	0	1	1	2	1	600	0	0	0	1
13191989	28038618	32351497	24	0	0	0	0	0	0	39	119	26	99	79	1	6	0	2	0	0	1	1	0	1	0	6	1	32958	32958	12381	21575	80	132	111	47	6	0	1	1	0	0	1	2	1	2000	0	0	0	0
19149636	29353989	32358035	70	0	1	0	1	0	0	39	121	24	86	75	14	10	3	4	1	1	1	0	0	1	1	12	1	172	172	172	172	155	23	202	27	21	0	0	0	0	1	1	2	1	400	0	0	1	0
18249179	21953437	32363848	24	0	1	0	0	0	1	36	90	17	97	54	6	9	1	1	1	1	1	1	0	0	0	2	1	206	206	206	206	188	73	244	37	30	0	0	0	0	0	1	2	1	400	0	0	1	0
12955567	29055751	32365302	59	1	0	0	0	0	1	37	85	25	89	66	35	10	1	1	0	1	0	0		0	0	2	1	3107	3107	3107	3107	72	14	94	13	7	0	0	0	0	1	0	2	1	2000	0	0	0	0
12284290	27094401	32366059	40	0	0	0	0	0	0	36	84	18	98	57	9	12	1	2	0	1	0	0		0	0	3	1	264	264	264	264	201	38	261	8	2	0	0	0	0	0	1	1	0	200	0	1	0	0
15705793	22126308	32367454	61	1	0	0	0	0	1	37	99	20	96	65	3	8	1	2	1	0	0	0		0	0	4	1	1089	1089	1089	1089	91	122	118	14	1	0	0	0	0	0	0	2	1	1000	0	0	0	0
19611589	27643931	32371355	73	1	0	1	1	0	1	36	66	18	96	89	10	9	1	1	0	1	0	0		0	0	2	1	127	127	127	127	187	36	243	7	3	0	0	0	0	0	0	1	0	200	0	1	0	0
14333551	25785941	32374363	40	0	0	0	0	0	1	37	95	23	97	75	28	8	1	2	1	1	0	0		0	0	2	1	47	47	47	47	297	11	386	9	1	0	0	0	0	1	0	1	0	200	0	1	0	0
18755721	20012316	32375282	49	0	1	1	0	0	0	39	105	18	97	65	5	10	1	1	1	1	0	0		0	0	2	1	129	129	129	129	194	25	252	9	5	0	0	0	0	0	1	1	0	200	0	1	0	0
13946573	28066438	32375459	75	1	0	0	1	0	0	37	105	32	91	75	9	12	3	2	1	1	0	0		0	0	3	1	8766	8766	8766	8766	109	64	145	1	1	1	1	1	1	1	1	2	1	2000	0	0	0	0
13352372	28752421	32384421	67	0	1	1	0	1	0	37	110	17	94	80	16	8	2	2	0	1	0	0		0	0	5	1	446	446	446	446	98	12	127	24	19	1	1	1	0	0	1	2	1	400	0	0	1	0
14918516	22852565	32392619	23	0	0	1	0	0	1	37	117	24	96	70	15	10	1	4	1	1	1	1	1	0	0	2	1	3414	3414	3414	3414	103	15	134	41	20	0	1	1	0	1	1	2	1	2000	0	0	0	0
16735911	20980210	32394451	66	0	1	0	1	0	1	37	87	31	95	73	2	6	0	1	0	1	0	0		0	0	2	1	1287	1287	1287	1287	86	67	112	36	16	0	0	0	0	1	1	2	1	1200	0	0	0	0
13097144	28163438	32395081	67	1	0	1	0	0	1	38	84	25	99	71	15	8	2	4	1	0	0	0		0	0	4	1	387	387	387	387	140	12	182	4	3	0	0	0	0	1	1	2	1	400	0	0	1	0
19360238	27590354	32398582	66	0	0	0	0	0	1	38	91	24	93	73	24	10	1	2	1	1	0	0		0	0	3	1	580	580	580	580	111	10	144	9	1	0	0	0	0	1	0	2	1	400	0	0	1	0
13956197	20048588	32404280	53	0	0	0	0	0	1	39	92	35	94	51	13	8	1	1	1	1	1	0	1	0	0	10	1	195	195	195	195	195	10	254	17	11	0	0	0	0	1	1	2	1	400	0	0	1	0
14259352	21914364	32408174	80	0	1	0	1	1	1	37	60	19	95	69	8	10	2	1	0	1	1	0	1	0	0	6	1	436	436	436	436	131	30	170	42	18	0	1	0	0	1	1	2	1	400	0	0	1	0
14197632	22415186	32412529	65	1	0	0	0	0	1	37	76	16	93	75	8	9	2	2	1	0	0	0		0	0	3	1	10876	10876	10876	10876	117	160	152	1	1	1	1	1	1	1	1	2	1	2000	0	0	0	0
15029036	22383141	32414218	61	0	0	0	0	0	1	37	98	22	91	89	40	12	1	3	0	1	0	0		0	0	3	1	1247	1247	1247	1247	93	54	121	5	5	1	1	1	1	1	1	2	1	1200	0	0	0	0
15029737	24327550	32419696	57	0	0	0	0	0	1	37	87	17	97	76	7	9	1	1	1	1	0	0		0	0	2	1	79	79	79	79	259	48	337	6	1	0	0	0	0	0	0	1	0	200	0	1	0	0
16895878	20957011	32422459	75	1	0	0	0	0	0	39	112	18	94	68	40	11	2	1	0	1	1	0	0	1	0	2	1	58	58	54	56	100	41	132	41	17	1	1	1	0	1	1	1	0	200	0	1	0	0
15003327	27245455	32446193	68	1	1	0	1	0	1	37	80	15	95	65	40	9	1	1	0	1	0	0		0	0	4	1	510	510	510	510	132	13	172	21	7	0	0	0	0	1	1	2	1	400	0	0	1	0
18154240	23209141	32448449	41	0	0	0	0	0	0	37	126	18	99	64	21	8	1	2	1	1	1	0	0	1	0	3	1	59	59	59	59	205	8	267	5	1	0	0	0	0	0	0	1	0	200	0	1	0	0
18230852	21492277	32454032	55	1	0	0	0	0	1	37	84	17	97	105	7	10	1	2	0	0	0	0		0	0	5	1	1038	1038	1038	1038	138	139	179	27	13	0	0	0	0	0	1	2	1	1000	0	0	0	0
16987387	26080448	32454627	75	0	1	0	0	0	1	37	72	19	99	66	5	10	1	1	1	1	1	1	0	0	0	3	1	503	503	503	503	198	20	257	35	35	0	0	0	0	0	1	2	1	400	0	0	1	0
13794196	28315285	32460087	42	0	0	0	0	0	0	37	129	22	95	70	11	10	1	3	1	1	0	0		0	0	4	1	1045	1045	1045	1045	65	85	85	6	1	0	0	0	0	0	0	2	1	1000	0	0	0	0
16333512	21773493	32482959	49	0	0	0	0	0	0	36	49	31	100	77	18	11	3	4	1	1	1	1	0	0	0	8	1	35657	35657	33281	35657	165	255	215	32	13	0	0	0	0	1	1	2	1	2000	0	0	0	0
18367377	21109754	32484982	91	0	0	0	0	0	1	37	87	17	100	84	6	11	2	2	0	1	0	0		0	0	7	1	217	217	217	217	148	13	192	8	8	1	1	1	1	1	1	1	0	200	0	1	0	0
12587707	23978768	32485374	88	0	0	1	1	0	0	37	104	19	100	90	8	11	1	1	1	1	0	0		0	0	2	1	67	67	67	67	212	33	276	3	1	0	0	0	0	0	0	1	0	200	0	1	0	0
10637413	24367708	32489544	86	0	0	1	0	1	1	38	109	11	100	67	11	10	1	2	1	1	0	0		0	0	2	1	209	209	209	209	117	23	152	32	28	0	1	0	0	0	1	2	1	400	0	0	1	0
16177747	29350453	32493994	24	0	0	0	0	0	0	38	77	23	100	73	13	9	1	1	0	1	0	0		0	0	4	1	295	295	295	295	142	49	185	5	1	0	0	0	0	0	0	1	0	200	0	1	0	0
13612740	21282044	32497559	51	1	0	0	0	0	1	37	91	17	94	80	7	8	1	1	0	0	0	0		0	0	4	1	460	460	460	460	254	306	330	4	3	0	0	0	0	0	1	2	1	400	0	0	1	0
11270948	27493644	32505082	94	1	1	0	0	0	0	37	96	23	97	72	22	10	1	1	1	1	1	0	1	0	0	2	1	77	77	77	77	247	34	321	9	3	1	1	0	0	0	1	1	0	200	0	1	0	0
13775396	20042293	32508751	53	0	0	0	0	0	0	37	99	21	96	77	17	10	0	1	1	1	0	0		0	0	2	1	167	167	167	167	198	29	257	5	2	0	0	0	0	0	1	2	1	400	0	0	1	0
19441402	28676335	32510672	70	0	1	0	1	0	1	37	83	12	98	77	12	8	1	1	0	1	0	0		0	0	2	1	66	66	66	66	215	22	280	8	5	0	0	0	0	0	1	1	0	200	0	1	0	0
19569420	23164865	32512473	92	1	0	0	1	0	1	36	80	31	100	48	16	10	3	3	0	1	1	1	0	0	0	3	1	1671	1671	1671	1671	92	88	120	35	6	0	0	0	0	0	1	2	1	1600	0	0	0	0
10992195	28795624	32521005	50	1	0	0	0	0	1	38	111	24	97	73	13	11	1	1	1	1	0	0		0	0	4	1	369	369	369	369	121	9	157	16	9	0	0	0	0	1	1	2	1	400	0	0	1	0
15699321	22740548	32521837	59	1	0	0	0	0	0	37	75	25	100	72	11	11	1	2	1	0	0	0		0	0	4	1	85	85	85	85	249	27	324	11	7	0	0	0	0	0	1	1	0	200	0	1	0	0
13297743	26433583	32528492	51	1	0	0	0	0	1	38	108	36	100	104	9	7	1	2	1	1	1	1	1	0	0	2	1	1143	1143	1143	1143	120	137	156	19	7	0	0	0	0	0	1	2	1	1000	0	0	0	0
13800450	29965349	32534625	68	1	1	0	0	0	0	37	76	16	100	67	9	13	2	1	0	1	0	0		0	0	5	1	655	655	655	655	172	17	224	11	5	0	0	0	0	1	1	2	1	600	0	0	0	1
11730580	22485231	32540313	56	0	0	0	0	0	1	37	73	25	99	83	10	7	1	2	0	1	0	0		0	0	3	1	34	34	29	32	159	12	229	10	2	0	0	0	0	1	1	1	0	200	0	1	0	0
16635089	27814289	32547365	57	0	0	1	0	1	1	37	98	13	100	117	13	6	6	3	1	1	1	0	1	0	0	4	1	659	659	659	659	160	20	208	17	2	0	0	0	0	0	0	2	1	600	0	0	0	1
17394776	25400280	32556356	81	0	0	0	0	1	0	36	81	11	99	82	1	10	3	3	1	0	0	0		0	0	12	1	1854	5628	1854	3733	138	86	182	42	14	0	0	0	0	0	1	2	1	1800	0	0	0	0
16827375	25496941	32562970	67	1	1	0	1	0	1	37	98	29	87	96	14	11	1	2	0	1	0	0		0	0	4	1	57	57	57	57	211	13	274	16	3	0	0	0	0	0	0	1	0	200	0	1	0	0
18335766	24382827	32563992	31	1	0	0	0	0	1	36	125	16	94	70	14	8	0	3	0	1	0	0		0	0	2	1	1512	1512	1512	1512	66	86	86	23	23	1	1	1	1	0	1	2	1	1400	0	0	0	0
12668827	27822180	32564390	76	0	1	0	0	0	1	37	79	21	100	63	15	6	1	2	1	1	0	0		0	0	5	1	41	41	41	41	230	17	299	9	2	0	0	0	0	1	1	1	0	200	0	1	0	0
15795209	27132322	32576577	87	0	1	0	0	1	1	37	86	25	98	70	10	9	1	1	1	1	1	1	0	0	0	4	1	122	122	122	122	167	40	217	29	26	0	0	0	0	0	1	1	0	200	0	1	0	0
10233597	27468267	32580800	72	0	1	0	1	0	0	35	80	22	100	75	7	13	1	1	0	1	0	0		0	0	3	1	117	117	117	117	189	52	246	29	13	0	0	0	0	1	1	1	0	200	0	1	0	0
16646700	25827331	32584362	34	0	0	0	0	0	1	37	123	18	99	74	18	10	1	2	0	1	0	0		0	0	3	1	342	342	342	342	139	185	181	8	5	0	0	0	0	0	1	1	0	200	0	1	0	0
18583355	24370105	32591600	43	0	0	0	0	0	1	38	93	18	100	67	6	10	1	2	0	1	0	0		0	0	2	1	146	146	146	146	211	129	274	17	11	0	0	0	0	0	1	1	0	200	0	1	0	0
19666055	27056678	32592859	66	1	0	0	0	0	1	34	71	23	100	75	12	16	1	3	0	1	1	1	0	0	0	6	1	787	787	787	787	139	15	181	7	7	1	1	1	1	1	1	2	1	600	0	0	0	1
13762124	27809697	32593154	63	1	1	0	1	0	1	37	87	23	99	61	39	8	1	2	1	1	1	0	0	0	1	2	1	801	801	801	801	142	24	185	9	1	0	0	0	0	0	0	2	1	800	0	0	0	0
17059606	25379455	32595031	53	1	0	1	0	0	1	37	108	25	92	108	7	11	1	1	1	1	0	0		0	0	3	1	16	16	16	16	350	20	455	3	2	0	0	0	0	0	1	1	0	200	0	1	0	0
18133382	25383558	32597239	90	0	1	0	0	1	1	36	92	16	99	44	11	8	3	3	0	1	0	0		0	0	5	1	785	785	785	785	140	8	182	3	0	1	1	1	1	1	1	2	1	600	0	0	0	1
12300667	20963681	32601487	52	0	0	1	0	0	1	39	107	14	100	82	5	10	2	4	1	1	1	1	0	1	1	9	1	1580	1896	1531	1669	44	44	64	56	52	0	1	1	1	0	1	2	1	1400	0	0	0	0
19192461	24941327	32607678	69	0	0	0	0	1	1	37	116	18	100	71	19	10	2	1	0	1	0	0		0	0	2	1	684	684	684	684	104	27	135	15	2	0	0	0	0	0	1	2	1	600	0	0	0	1
17626829	26688831	32612180	64	1	0	1	0	0	1	37	70	22	96	67	21	11	1	1	0	1	0	0		0	0	3	1	80	80	80	80	223	11	290	2	1	0	0	0	0	0	0	1	0	200	0	1	0	0
13598803	25950935	32612189	65	0	0	0	0	0	0	37	89	23	97	67	13	9	4	2	1	1	0	0		0	0	4	1	189	189	189	189	183	32	238	16	16	0	0	0	0	0	1	2	1	400	0	0	1	0
18613687	21683893	32612785	80	0	1	1	1	0	1	36	91	13	98	52	8	9	1	1	0	1	0	0		0	0	2	1	289	289	289	289	161	57	209	3	1	0	0	0	0	0	0	1	0	200	0	1	0	0
17728787	22299973	32615359	87	0	1	0	0	1	0	39	93	26	93	69	10	8	5	2	1	1	0	0		0	0	4	1	605	605	605	605	141	12	183	6	3	0	0	0	0	0	1	2	1	600	0	0	0	1
17200755	28062533	32620013	74	0	1	0	1	1	1	37	64	21	98	64	8	10	2	1	0	1	1	0	1	0	0	2	1	1006	1006	1006	1006	149	58	198	30	30	0	1	1	1	0	1	2	1	1000	0	0	0	0
19564189	22509466	32630842	51	0	0	0	0	0	0	36	112	28	100	121	5	12	3	2	0	1	0	0		0	0	10	1	14172	14172	14172	14172	109	168	142	1	1	1	1	1	1	1	1	2	1	2000	0	0	0	0
15826307	21935674	32631086	44	0	1	1	1	1	0	37	76	19	95	76	11	11	1	1	0	1	0	0		0	0	2	1	376	376	376	376	172	31	224	7	2	0	0	0	0	0	0	1	0	200	0	1	0	0
13326384	24605860	32631775	92	1	0	1	1	0	1	35	64	14	99	55	10	9	1	2	1	1	0	0		0	0	2	1	87	87	87	87	173	84	225	5	3	0	0	0	0	1	1	1	0	200	0	1	0	0
19998330	24492004	32641669	73	0	1	1	0	1	1	37	59	20	98	90	8	8	2	1	1	1	0	0		0	0	2	1	89	89	89	89	230	25	299	7	3	0	1	0	0	0	1	1	0	200	0	1	0	0
12211587	28284188	32652212	64	1	0	1	0	0	0	37	67	8	100	58	15	10	1	1	1	0	1	1	0	0	0	9	1	286	286	286	286	179	33	233	43	43	0	0	0	0	0	1	2	1	400	0	0	1	0
12386418	20980707	32654814	69	0	0	1	0	1	0	36	72	15	100	79	20	11	4	2	0	1	0	0		0	0	7	1	855	855	855	855	30	40	39	4	4	1	1	1	1	1	1	2	1	800	0	0	0	0
10873456	29916398	32659567	79	0	0	0	0	0	0	36	119	14	100	69	40	7	5	3	0	1	0	0		0	0	2	1	476	476	476	476	129	49	170	20	2	0	0	0	0	1	0	2	1	400	0	0	1	0
11934114	21617583	32660163	84	0	1	0	1	1	1	38	73	19	98	44	7	13	2	1	1	1	1	0	0	0	0	4	1	615	615	615	615	120	136	156	30	4	0	0	0	0	0	1	2	1	600	0	0	0	1
16039142	22754250	32661161	69	1	0	0	0	0	0	36	69	24	99	92	27	10	6	1	0	1	0	0		0	0	5	1	1033	1033	1033	1033	162	82	211	19	19	0	1	0	0	0	1	2	1	1000	0	0	0	0
11098688	21736998	32670100	88	1	0	1	0	0	0	37	83	12	98	85	23	10	1	2	0	1	0	0		0	0	5	1	235	235	235	235	127	9	165	15	1	0	0	0	0	1	0	1	0	200	0	1	0	0
17973277	25874253	32670357	50	0	0	0	0	1	1	37	83	8	100	88	8	8	6	2	0	1	0	0		0	0	4	1	459	459	459	459	127	12	165	18	9	0	0	0	0	0	1	2	1	400	0	0	1	0
14589313	24847650	32672524	68	0	1	0	1	1	1	37	89	19	97	87	7	8	8	2	0	1	0	0		0	0	6	1	543	543	543	543	127	36	165	15	9	0	0	0	0	0	1	2	1	400	0	0	1	0
17509177	26528363	32672640	50	0	0	0	0	0	1	37	99	37	93	64	10	7	1	3	1	1	1	0	1	0	0	2	1	155	155	155	155	159	21	207	16	4	0	0	0	0	0	1	2	1	400	0	0	1	0
12250606	27211810	32674254	48	0	0	0	0	0	1	36	109	26	92	67	37	9	1	3	0	1	0	0		0	0	4	1	7379	7379	7379	7379	68	104	88	1	1	1	1	1	1	1	1	2	1	2000	0	0	0	0
13669897	21723287	32674577	75	1	0	0	0	0	1	37	65	21	97	72	23	10	4	3	1	1	0	0		0	0	4	1	621	621	621	621	113	33	147	11	5	0	0	0	0	1	0	2	1	600	0	0	0	1
12845930	29988959	32676856	74	1	1	1	1	0	1	37	69	19	95	69	4	9	1	2	0	1	0	0		0	0	3	1	78	78	78	78	178	15	231	4	1	0	0	0	0	1	0	1	0	200	0	1	0	0
14659273	29052197	32681826	46	1	0	0	0	0	0	37	108	19	94	89	11	12	2	3	0	1	0	0		0	0	4	1	2486	30111	2486	16299	130	194	169	20	5	0	0	0	0	0	1	2	1	2000	0	0	0	0
18858961	25301640	32685266	81	0	0	0	0	0	0	37	80	15	100	71	12	12	1	2	0	1	0	0		0	0	2	1	439	439	439	439	162	48	211	16	9	0	0	0	0	0	0	2	1	400	0	0	1	0
14709712	23904975	32685499	70	1	0	1	1	0	1	36	86	8	100	97	18	10	1	1	0	0	0	0		0	0	4	1	504	504	504	504	118	146	153	13	3	0	0	0	0	1	0	2	1	400	0	0	1	0
18975498	20602612	32688128	27	1	0	0	0	0	1	39	140	21	100	71	23	9	1	3	1	1	1	1	0	1	1	4	1	1564	1564	1564	1564	106	33	138	45	22	0	0	0	0	1	1	2	1	1400	0	0	0	0
17710515	26021453	32691465	67	1	0	0	0	0	1	39	83	20	100	79	12	6	1	1	0	1	0	0		0	0	4	1	1109	1109	1109	1109	216	43	281	7	2	0	0	0	0	0	1	2	1	1000	0	0	0	0
17655401	22648572	32695241	60	0	0	0	0	0	1	37	107	25	97	83	13	7	1	2	1	1	0	0		0	0	4	1	895	895	895	895	135	165	176	20	4	0	0	0	0	1	0	2	1	800	0	0	0	0
12364448	25113742	32696065	76	0	0	0	1	0	0	37	77	14	99	83	7	12	1	2	0	0	0	0		0	0	2	1	59	59	59	59	120	17	156	22	3	0	0	0	0	1	0	1	0	200	0	1	0	0
16232319	28658299	32697087	80	0	0	1	1	1	0	38	90	14	100	65	21	10	1	2	1	1	1	0	1	0	0	3	1	713	713	525	647	104	46	179	69	60	0	0	0	0	0	1	2	1	600	0	0	0	1
18408630	21461356	32708126	62	1	0	1	0	0	1	38	98	11	99	63	13	7	2	1	0	1	1	1	0	0	0	4	1	17	17	17	17	280	69	364	15	9	0	0	0	0	1	1	0	0	0	1	0	0	0
17096041	24581169	32711073	76	1	1	0	0	0	1	36	60	16	100	59	18	11	1	1	0	1	1	1	1	0	0	3	1	542	542	542	542	193	18	251	38	38	0	0	0	0	0	1	2	1	400	0	0	1	0
12028875	24359532	32713223	41	1	1	0	0	0	1	36	65	21	100	61	12	7	3	2	1	1	0	0		0	0	4	1	53	53	53	53	208	45	270	6	6	0	0	0	0	1	1	1	0	200	0	1	0	0
19416579	26877396	32730273	54	1	0	0	0	0	1	38	59	12	100	64	11	10	1	1	0	0	1	1	0	0	0	3	1	201	201	201	201	258	137	335	16	8	0	0	0	0	1	1	1	0	200	0	1	0	0
14556479	25103965	32732739	22	0	0	0	0	0	1	38	114	19	98	54	11	10	1	1	1	1	0	0		0	0	2	1	112	112	112	112	132	6	172	5	3	0	0	0	0	0	0	1	0	200	0	1	0	0
10927673	29008025	32736490	80	0	0	1	1	1	1	38	132	20	99	73	13	12	2	1	0	1	0	0		0	0	2	1	368	368	368	368	161	28	209	7	4	0	0	0	0	0	1	1	0	200	0	1	0	0
17888255	23336951	32744001	66	0	0	1	0	0	0	36	119	17	96	55	9	9	1	2	0	0	1	1	0	0	0	5	1	705	705	705	705	112	78	146	20	18	1	1	1	1	0	1	2	1	600	0	0	0	1
10583686	27935288	32744303	35	1	0	0	0	0	1	37	115	18	100	102	11	14	1	3	0	1	1	1	0	0	1	2	1	4957	4957	4957	4957	228	279	296	17	9	0	0	0	0	0	1	2	1	2000	0	0	0	0
13125051	25519392	32749069	74	0	1	1	0	1	1	37	88	18	100	83	10	8	2	4	1	1	1	1	0	0	0	8	1	1704	1704	1704	1704	155	45	202	56	56	0	0	0	0	1	1	2	1	1600	0	0	0	0
18788806	28720413	32750475	50	1	0	1	1	0	1	37	70	12	97	69	9	11	1	2	0	1	0	0		0	0	2	1	103	103	103	103	201	33	261	5	3	0	0	0	0	0	1	1	0	200	0	1	0	0
17437384	20628555	32759202	49	0	0	0	0	0	1	36	72	15	98	60	14	9	1	1	0	1	0	0		0	0	4	1	331	331	331	331	55	59	72	10	3	0	0	0	0	1	1	1	0	200	0	1	0	0
17256683	29581724	32760574	66	0	0	0	1	0	1	37	115	19	86	93	6	8	1	1	0	1	0	0		0	0	3	1	1980	1980	1980	1980	111	77	144	10	10	0	0	0	0	0	1	2	1	1800	0	0	0	0
12405648	29481023	32763512	66	1	0	1	0	0	0	37	71	20	94	102	16	11	4	1	1	0	1	0	1	0	0	10	1	857	857	857	857	197	40	256	57	9	0	0	0	0	1	1	2	1	800	0	0	0	0
17449089	26875546	32768640	90	0	1	0	1	1	1	37	65	15	99	66	12	7	4	1	1	1	0	0		0	0	3	1	670	670	670	670	182	29	237	14	14	1	1	1	1	0	1	2	1	600	0	0	0	1
19019784	29437037	32770497	89	0	1	0	0	0	1	36	61	19	95	68	8	8	1	1	1	0	1	0	1	0	0	2	1	16	16	16	16	374	18	486	6	1	0	0	0	0	0	0	1	0	200	0	1	0	0
11451979	22657768	32770582	64	0	1	0	1	1	1	36	86	19	97	98	19	9	3	1	0	1	0	0		0	0	5	1	2779	2779	2779	2779	129	34	168	16	2	0	0	0	0	0	1	2	1	2000	0	0	0	0
16467939	22428650	32771340	41	0	0	0	0	0	0	37	103	21	100	85	25	15	5	3	0	1	0	0		0	0	4	1	13825	13825	13825	13825	162	221	211	0	1	1	1	1	1	1	1	2	1	2000	0	0	0	0
17140859	28385820	32772613	63	0	1	1	0	0	0	36	76	19	93	58	15	11	2	1	0	1	0	0		0	0	3	1	88	88	88	88	269	26	350	5	3	0	1	0	0	1	1	1	0	200	0	1	0	0
18112176	26333260	32788006	30	0	0	0	0	0	0	38	101	37	97	104	8	9	1	1	1	1	1	1	0	0	1	3	1	482	482	482	482	150	58	197	93	70	0	0	0	0	0	1	2	1	400	0	0	1	0
16297202	26923232	32801550	61	0	1	0	0	0	1	37	84	24	98	90	5	12	3	2	0	1	1	0	0	1	0	3	1	50	50	50	50	373	21	485	27	5	0	0	0	0	1	1	1	0	200	0	1	0	0
11472884	25662999	32807421	77	0	0	0	0	0	0	39	99	16	96	71	6	13	1	2	0	0	1	1	0	0	0	3	1	322	322	322	322	116	11	151	19	5	0	0	0	0	0	1	1	0	200	0	1	0	0
13318171	22065711	32813541	32	1	1	0	0	1	1	35	58	13	100	66	5	11	8	1	0	1	0	0		0	0	6	1	1353	1353	1353	1353	87	28	113	9	7	0	0	0	0	0	1	2	1	1200	0	0	0	0
14849360	20152551	32817197	59	0	0	1	0	0	0	36	63	17	97	69	16	10	3	1	1	1	0	0		0	0	7	1	475	475	475	475	91	35	118	34	19	0	0	0	0	0	0	2	1	400	0	0	1	0
12054582	24839479	32818567	67	1	0	0	0	0	1	37	90	17	99	72	11	10	1	1	0	1	0	0		0	0	3	1	32	32	32	32	291	19	378	1	2	1	1	1	1	0	1	1	0	200	0	1	0	0
11117353	20679385	32823385	83	1	0	0	0	0	1	37	71	16	100	86	8	10	1	2	1	1	0	0		0	0	2	1	333	333	333	333	137	59	178	11	11	1	1	0	0	0	1	2	1	400	0	0	1	0
13297424	28903448	32828242	68	0	0	1	0	1	1	37	82	9	98	71	12	7	5	1	1	1	0	0		0	0	4	1	2058	2058	2058	2058	96	63	125	27	1	0	0	0	0	0	1	2	1	2000	0	0	0	0
17059345	25257169	32832227	89	0	1	0	0	0	0	36	65	27	95	95	4	10	2	3	0	1	0	0		0	0	2	1	17675	17675	17675	17675	111	149	144	3	3	1	1	0	0	0	1	2	1	2000	0	0	0	0
16418338	20798804	32832399	56	0	0	1	0	1	1	39	99	20	95	100	11	8	1	1	1	1	0	0		0	0	4	1	911	911	911	911	147	27	191	46	13	0	0	0	0	0	1	2	1	800	0	0	0	0
14147380	27251740	32832800	50	0	0	1	0	1	1	39	140	23	95	79	4	10	5	4	1	1	1	0	0	1	1	7	1	1575	1575	1575	1575	286	40	372	33	33	0	0	0	0	1	1	2	1	1400	0	0	0	0
17636005	29580303	32840460	82	1	0	0	0	0	1	36	57	13	96	90	9	12	1	1	1	1	0	0		0	0	2	1	233	233	233	233	196	79	255	5	2	0	0	0	0	0	1	2	1	400	0	0	1	0
17672254	25933496	32842884	77	1	0	0	1	0	1	37	76	20	99	97	12	13	1	3	0	1	1	0	0	0	1	2	1	77	77	77	77	212	26	276	31	21	0	0	0	0	0	1	1	0	200	0	1	0	0
12233133	26178609	32844515	48	1	0	1	0	0	1	37	110	20	100	51	9	13	1	1	1	1	0	0		0	0	2	1	159	159	159	159	189	87	246	4	3	0	0	0	0	0	0	2	1	400	0	0	1	0
15586187	26037254	32851029	64	0	1	0	0	1	1	36	93	22	96	53	17	9	1	1	1	1	1	1	0	1	1	2	1	189	189	189	189	169	43	223	32	32	0	0	0	0	0	1	2	1	400	0	0	1	0
16055700	24007687	32856270	37	0	0	0	0	0	1	37	96	12	96	91	3	7	3	3	0	0	1	0	1	0	0	8	1	2126	2126	2126	2126	116	49	151	23	9	1	1	1	0	0	1	2	1	2000	0	0	0	0
18921558	25855937	32856945	46	0	0	0	0	0	1	37	74	32	100	66	19	13	4	4	0	1	1	1	0	0	0	4	1	559	559	559	559	144	11	187	16	8	0	0	0	0	1	1	2	1	400	0	0	1	0
16478197	22262009	32857134	93	1	0	1	0	0	1	37	97	27	100	78	9	11	2	2	1	1	0	0		0	0	3	1	10092	10092	10092	10092	80	111	104	8	2	1	1	1	0	0	1	2	1	2000	0	0	0	0
19418675	29600838	32858356	18	0	1	0	0	0	0	38	87	22	100	66	15	12	1	2	0	1	0	0		0	0	3	1	573	573	573	573	187	23	243	5	5	0	0	0	0	0	1	2	1	400	0	0	1	0
16674342	20128181	32859709	55	1	1	0	0	0	0	37	84	19	96	77	7	8	1	2	0	1	0	0		0	0	2	1	482	482	482	482	245	51	319	20	12	0	0	0	0	0	1	2	1	400	0	0	1	0
19585396	25570114	32862371	56	0	1	0	1	1	1	36	86	19	97	93	5	9	3	1	0	1	1	0	1	0	0	3	1	61	61	61	61	288	23	374	12	12	0	0	0	0	1	1	1	0	200	0	1	0	0
12543250	20141818	32866003	68	1	0	0	0	0	1	39	121	20	96	110	7	7	1	1	1	1	1	1	0	0	0	2	1	621	621	621	621	167	31	217	59	41	0	0	0	0	1	1	2	1	600	0	0	0	1
12342202	27879060	32868672	37	0	0	0	0	0	1	37	101	30	100	87	10	8	6	1	0	1	1	0	0	1	0	5	1	1448	1448	1448	1448	97	15	126	46	1	0	0	0	0	0	1	2	1	1400	0	0	0	0
11867957	29273913	32880488	82	0	1	1	0	1	1	37	83	18	99	81	6	7	1	1	0	1	1	1	0	0	0	2	1	862	862	862	862	128	37	166	16	16	0	0	0	0	0	1	2	1	800	0	0	0	0
18110592	25083839	32881559	42	1	0	0	0	0	0	37	137	24	94	105	10	10	0	2	0	1	0	0		0	0	3	1	1943	1943	1943	1943	197	46	256	9	2	0	0	0	0	0	0	2	1	1800	0	0	0	0
11554694	27034794	32882024	82	0	0	0	0	1	0	36	110	21	96	69	15	16	3	2	0	1	0	0		0	0	5	1	186	186	186	186	146	80	190	22	3	0	0	0	0	0	1	1	0	200	0	1	0	0
17247700	27802929	32884242	38	0	1	0	0	0	1	37	85	26	100	72	11	7	1	1	1	0	0	0		0	0	2	1	66	66	66	66	260	16	338	5	3	0	0	0	0	0	0	1	0	200	0	1	0	0
19950864	24800600	32885970	83	0	0	0	0	0	1	37	71	24	100	90	9	12	1	2	0	0	0	0		0	0	2	1	278	278	278	278	137	51	178	26	17	0	0	0	0	0	1	1	0	200	0	1	0	0
17444849	27391782	32891163	71	0	0	0	0	0	1	37	56	15	97	80	7	12	1	1	1	1	1	0	1	0	0	2	1	235	235	235	235	139	171	181	44	44	0	0	0	0	0	1	2	1	400	0	0	1	0
14265172	23481058	32894334	73	1	0	0	0	0	0	37	108	25	93	81	9	7	1	2	1	1	0	0		0	0	2	1	715	715	715	715	130	55	169	9	6	0	0	0	0	1	1	2	1	600	0	0	0	1
16230279	26250523	32895123	74	0	0	0	0	0	0	36	89	14	95	83	3	11	0	4	1	1	1	0	1	0	0	2	1	481	481	481	481	200	243	260	4	2	1	1	1	0	0	1	2	1	400	0	0	1	0
16627435	26972438	32897671	80	0	1	1	1	1	0	36	66	33	94	60	17	10	4	2	0	1	1	0	1	0	0	7	1	414	414	414	414	157	58	204	7	8	1	1	1	1	1	1	2	1	400	0	0	1	0
16343751	29141869	32900830	76	0	1	1	1	1	1	37	95	19	99	81	8	9	2	2	0	0	1	0	1	1	0	7	1	1171	1171	1171	1171	208	60	270	43	24	0	0	0	0	1	1	2	1	1000	0	0	0	0
15186614	21560208	32908488	53	0	0	0	0	0	1	37	69	17	99	55	12	13	1	2	0	0	0	0		0	0	10	1	488	488	488	488	40	65	52	12	5	1	1	1	0	1	1	2	1	400	0	0	1	0
10041894	29235759	32910822	79	1	0	0	0	0	1	37	62	14	96	48	14	10	1	2	0	1	0	0		0	0	4	1	1144	1144	1144	1144	112	14	146	4	2	0	0	0	0	0	1	2	1	1000	0	0	0	0
17851873	26242070	32911110	88	0	1	0	0	1	1	36	94	19	94	77	11	8	2	1	1	0	1	0	1	0	0	3	1	290	290	290	290	148	52	197	28	10	1	1	1	1	0	1	2	1	400	0	0	1	0
10597808	23151286	32914668	63	1	0	0	0	0	1	37	82	23	96	94	9	10	1	2	1	1	0	0		0	0	3	1	133	133	133	133	197	42	256	30	0	0	0	0	0	0	0	1	0	200	0	1	0	0
16426626	27870396	32919190	68	0	0	0	0	0	0	37	49	18	100	93	11	9	1	1	0	1	1	0	0	1	0	3	1	241	241	241	241	111	27	144	28	5	0	0	0	0	0	1	1	0	200	0	1	0	0
17897160	21407884	32922088	70	0	1	0	0	1	0	37	83	25	98	82	31	11	2	2	1	1	0	0		0	0	6	1	316	316	316	316	142	29	185	10	6	0	0	0	0	1	1	2	1	400	0	0	1	0
13017503	21320306	32941966	88	1	1	1	0	0	1	37	107	30	87	81	11	8	0	1	1	1	0	0		0	0	2	1	16	22	16	18	249	41	324	18	3	0	1	0	0	0	1	1	0	200	0	1	0	0
16094899	22919842	32943861	89	0	1	0	0	0	1	37	128	15	97	75	5	7	4	2	0	0	0	0		0	0	3	1	3780	3780	2755	3268	122	39	159	4	2	0	0	0	0	0	1	2	1	2000	0	0	0	0
15866669	22963338	32946993	26	0	0	0	0	0	1	38	134	20	97	110	7	10	3	3	1	1	1	1	1	0	0	2	1	1531	1531	1531	1531	141	82	186	17	11	0	0	0	0	0	1	2	1	1400	0	0	0	0
18361380	29615907	32950965	54	1	0	0	0	0	1	37	112	27	98	95	15	10	1	1	1	1	1	1	0	0	0	2	1	207	207	207	207	233	23	303	31	31	0	0	0	0	0	1	2	1	400	0	0	1	0
13194394	22991415	32951608	65	0	1	1	1	0	1	38	88	18	97	82	40	16	1	4	0	1	0	0		0	0	4	1	652	652	652	652	149	46	190	13	13	1	1	1	1	1	1	2	1	600	0	0	0	1
17103624	29062020	32958619	76	0	1	1	1	1	0	37	76	16	100	116	10	9	2	2	1	1	0	0		0	0	2	1	50	50	50	50	252	32	328	6	3	0	0	0	0	1	1	1	0	200	0	1	0	0
18495141	28399365	32968922	86	1	0	0	0	0	0	36	80	16	100	59	40	8	1	1	1	0	0	0		0	0	5	1	675	675	675	675	135	28	185	22	21	0	0	0	0	0	1	2	1	600	0	0	0	1
11887646	28181987	32970285	53	0	0	0	0	1	1	36	79	21	96	99	2	7	8	1	1	1	0	0		0	0	5	1	925	925	925	925	139	41	181	23	2	0	0	0	0	0	1	2	1	800	0	0	0	0
19367944	22255676	32980355	86	0	1	1	1	1	1	38	67	20	100	50	8	9	1	1	1	1	1	0	1	0	0	4	1	54	54	54	54	250	51	325	30	3	0	0	0	0	1	0	1	0	200	0	1	0	0
12268300	27708605	32981748	55	0	0	0	0	1	1	37	50	18	100	67	10	10	1	2	0	1	0	0		0	0	2	1	156	156	156	156	170	74	221	6	3	0	0	0	0	1	1	1	0	200	0	1	0	0
19287295	24086115	32983523	47	0	1	0	1	0	1	38	92	24	93	93	19	12	2	2	0	1	0	0		0	0	5	1	489	489	489	489	151	59	199	12	7	0	0	0	0	1	1	2	1	400	0	0	1	0
14731159	23316781	32983852	34	0	0	0	0	0	1	36	65	17	100	87	7	10	1	2	0	0	0	0		0	0	4	1	128	128	128	128	202	137	263	6	2	0	0	0	0	1	0	1	0	200	0	1	0	0
10082014	20221705	32988939	82	1	1	0	0	0	1	36	90	14	100	77	9	7	1	1	1	1	0	0		0	0	3	1	340	340	340	340	160	21	212	8	2	0	0	0	0	1	1	2	1	400	0	0	1	0
15124771	21899606	32994814	54	0	0	1	0	0	1	37	124	37	92	51	12	10	1	1	1	1	0	0		0	0	2	1	357	357	357	357	196	88	255	21	14	0	0	0	0	1	1	2	1	400	0	0	1	0
14095785	23799859	32995130	85	0	1	0	1	0	1	36	59	18	99	89	5	10	1	1	0	0	1	0	1	0	0	4	1	672	672	672	672	135	53	176	6	2	0	0	0	0	0	0	2	1	600	0	0	0	1
11480592	24730553	33001091	37	0	0	0	0	0	1	36	66	27	97	78	5	11	1	1	0	1	0	0		0	0	2	1	109	109	109	109	199	41	259	6	3	0	0	0	0	0	0	1	0	200	0	1	0	0
15956776	21522101	33003202	40	1	0	1	0	0	0	37	101	24	95	56	5	12	0	2	0	1	1	1	0	0	0	2	1	3660	3660	3660	3660	241	48	313	13	11	0	0	0	0	0	1	2	1	2000	0	0	0	0
11518898	23186402	33006149	62	0	0	0	0	1	1	38	81	18	98	66	7	9	5	1	0	1	1	0	0	0	1	6	1	315	315	315	315	104	15	135	10	3	0	0	0	0	0	1	1	0	200	0	1	0	0
10342727	24641962	33019239	72	0	1	1	1	1	1	39	85	13	94	65	9	6	2	1	1	0	1	0	0	1	0	3	1	269	269	269	269	169	66	220	17	4	0	0	0	0	0	1	2	1	400	0	0	1	0
18076600	20942903	33023534	78	1	1	1	0	0	1	37	76	19	96	65	10	9	2	1	0	1	0	0		0	0	3	1	1046	1046	1046	1046	132	14	172	8	3	0	0	0	0	0	0	2	1	1000	0	0	0	0
12587000	24677944	33026249	28	0	0	0	0	0	0	38	80	8	100	76	15	8	1	2	0	1	1	1	0	0	0	6	1	625	625	625	625	124	22	161	17	12	0	0	0	0	0	1	2	1	600	0	0	0	1
13021546	26959947	33026816	66	0	0	1	0	1	0	39	114	18	95	63	12	11	2	1	0	1	1	0	0	0	1	8	1	551	551	551	551	98	22	127	20	20	0	0	0	0	0	1	2	1	400	0	0	1	0
12990564	29696037	33027291	73	1	0	1	0	0	1	37	69	21	100	51	24	7	2	1	1	1	0	0		0	0	3	1	360	360	360	360	106	11	138	10	3	0	0	0	0	1	0	2	1	400	0	0	1	0
15990037	23703451	33030799	79	0	0	0	0	1	1	37	62	19	98	83	27	9	5	1	1	1	1	0	0	1	1	2	1	472	472	472	472	148	18	192	18	7	0	0	0	0	0	1	2	1	400	0	0	1	0
10402810	23951807	33031972	75	0	1	0	1	0	0	37	99	18	93	65	7	10	3	1	0	0	0	0		0	0	6	1	1190	1190	1190	1190	146	46	190	6	4	0	1	0	0	0	1	2	1	1000	0	0	0	0
18275245	22999142	33032447	56	1	0	0	0	0	0	38	114	17	91	102	1	10	1	1	0	0	0	0		0	0	2	1	765	1284	765	1025	84	20	109	17	18	1	1	1	1	0	1	2	1	600	0	0	0	1
11877319	26087006	33032770	62	1	1	0	0	0	0	37	107	37	97	64	11	11	1	1	0	1	0	0		0	0	2	1	77	77	77	77	184	28	239	5	2	0	0	0	0	0	0	1	0	200	0	1	0	0
13967003	28946299	33044552	68	0	0	0	0	0	1	36	97	21	98	71	6	8	1	2	1	1	1	0	1	0	0	2	1	16	16	16	16	196	127	255	28	4	1	1	1	0	0	1	1	0	200	0	1	0	0
12468629	28035030	33044568	66	0	1	1	1	1	1	37	59	22	94	77	18	10	3	1	0	1	0	0		0	0	3	1	184	184	184	184	137	18	178	10	8	0	0	0	0	0	1	1	0	200	0	1	0	0
19438279	28622987	33050577	50	1	0	1	0	0	1	39	122	25	97	95	1	10	1	4	0	1	0	0		0	0	3	1	36963	41860	2549	15838	145	74	184	22	11	0	0	0	0	0	1	2	1	2000	0	0	0	0
15021968	20266331	33055823	76	0	1	0	1	1	1	37	69	20	95	64	12	10	6	1	1	1	0	0		0	0	3	1	12028	12028	12028	12028	125	116	163	7	4	0	0	0	0	1	1	2	1	2000	0	0	0	0
17084981	24169076	33071977	79	1	1	0	0	0	0	36	75	16	100	69	9	9	1	4	0	0	0	0		0	0	2	1	798	798	798	798	101	32	131	43	43	0	0	0	0	1	1	2	1	600	0	0	0	1
12574490	27531601	33075476	71	0	1	0	1	0	1	37	77	23	96	79	14	9	1	4	1	0	0	0		0	0	2	1	2275	2275	2275	2275	188	38	244	13	1	0	0	0	0	0	0	2	1	2000	0	0	0	0
14257514	23567333	33078115	91	1	0	0	0	0	1	36	117	18	93	91	9	11	1	2	1	1	0	0		0	0	2	1	84	84	84	84	219	35	285	4	3	0	0	0	0	0	1	1	0	200	0	1	0	0
13478306	23527405	33081528	65	0	0	1	0	0	0	37	68	18	98	83	11	13	1	1	0	1	0	0		0	0	3	1	507	507	507	507	141	26	183	7	2	0	0	0	0	0	1	2	1	400	0	0	1	0
10290183	20780027	33086644	70	0	0	0	0	0	1	36	87	37	95	86	10	10	5	1	0	0	1	1	0	0	1	7	1	433	433	433	433	63	21	82	28	5	1	1	1	0	0	1	2	1	400	0	0	1	0
13827336	29081732	33090685	80	1	0	0	0	0	1	36	79	25	98	95	30	10	1	2	1	1	0	0		0	0	2	1	932	932	932	932	113	27	147	12	3	1	1	1	0	0	0	2	1	800	0	0	0	0
18320331	25033837	33091914	48	0	0	0	0	0	0	36	78	16	96	45	5	12	1	1	0	0	0	0		0	0	3	1	228	228	228	228	178	84	231	5	1	0	0	0	0	0	0	1	0	200	0	1	0	0
17607164	20937760	33103871	72	0	1	1	0	1	1	36	76	16	100	84	11	8	4	1	1	1	1	0	1	1	0	3	1	607	607	607	607	92	29	120	18	18	0	0	0	0	0	1	2	1	600	0	0	0	1
10667727	24456689	33106432	76	0	1	1	1	1	1	39	105	22	97	78	13	11	1	2	1	1	1	1	1	1	0	9	1	210	210	210	210	125	43	163	45	38	0	0	0	0	1	1	2	1	400	0	0	1	0
18371833	26874372	33106776	60	1	0	0	0	0	0	38	115	13	98	55	18	11	2	4	0	0	1	0	0	1	0	4	1	17933	25963	17933	21948	140	85	183	4	4	1	1	1	1	0	1	2	1	2000	0	0	0	0
13538696	24130652	33116576	60	0	0	1	0	0	1	39	100	32	99	74	23	13	2	4	0	0	1	1	0	0	0	8	1	314	512	314	413	108	20	204	34	25	0	0	0	0	1	1	1	0	200	0	1	0	0
11408874	26001001	33118083	87	1	1	0	0	0	1	36	70	12	99	68	23	11	2	2	0	1	1	0	0	0	1	2	1	540	540	540	540	172	209	224	6	3	0	0	0	0	0	1	2	1	400	0	0	1	0
15463295	24465523	33119631	47	0	0	0	0	0	1	37	84	13	100	83	3	7	1	3	0	1	0	0		0	0	6	1	79	86	69	78	92	112	120	69	2	0	0	0	0	0	1	1	0	200	0	1	0	0
16544722	21254833	33120557	51	0	0	1	0	1	0	36	84	18	96	114	7	10	8	1	0	1	0	0		0	0	5	1	1286	1286	1286	1286	126	54	164	5	2	0	0	0	0	0	1	2	1	1200	0	0	0	0
11812923	21151780	33128643	61	1	0	0	1	0	1	38	74	17	94	70	12	9	1	1	0	1	1	0	1	0	0	2	1	57	57	57	57	249	39	324	8	3	0	0	0	0	0	0	1	0	200	0	1	0	0
13527880	29315417	33137451	32	1	0	1	0	0	0	38	100	26	93	120	12	13	1	2	0	1	0	0		0	0	3	1	1443	1443	1443	1443	156	24	203	9	2	0	0	0	0	0	0	2	1	1400	0	0	0	0
11271294	20295074	33148395	58	1	0	1	0	0	1	37	91	15	95	67	10	9	1	2	0	1	0	0		0	0	5	1	18741	24874	18741	21808	107	147	139	6	6	1	1	0	0	0	1	2	1	2000	0	0	0	0
12460706	20409877	33150173	57	1	0	0	0	0	1	37	110	20	97	72	29	8	2	2	0	0	0	0		0	0	6	1	750	750	750	750	102	64	136	27	13	1	1	1	1	1	1	2	1	600	0	0	0	1
16169853	20027733	33157970	26	0	0	0	0	0	1	37	55	18	100	121	7	10	1	2	1	1	0	0		0	0	2	1	16	16	16	16	269	48	350	6	2	0	0	0	0	0	0	1	0	200	0	1	0	0
14596582	23533345	33158586	81	0	1	0	0	1	0	35	94	24	95	65	9	8	4	4	0	1	0	0		0	0	3	1	27453	27453	27453	27453	140	200	182	4	4	1	1	1	1	1	1	2	1	2000	0	0	0	0
13629419	26581908	33160177	46	0	0	0	0	0	1	36	79	19	100	71	16	9	4	2	1	1	0	0		0	0	18	1	1428	1428	1428	1428	136	187	177	35	5	0	0	0	0	1	1	2	1	1400	0	0	0	0
19635420	20633252	33160781	35	0	1	0	0	0	0	37	140	37	92	93	21	11	1	1	1	1	0	0		0	0	3	1	1314	1314	1314	1314	186	51	244	15	4	0	0	0	0	0	1	2	1	1200	0	0	0	0
10304339	21978599	33165731	57	0	0	0	1	0	0	36	111	15	100	98	7	10	1	1	1	1	0	0		0	0	2	1	855	855	855	855	117	43	152	18	4	0	1	0	0	0	0	2	1	800	0	0	0	0
12579469	20547939	33173611	80	0	1	0	0	1	1	38	85	30	93	61	8	10	7	1	0	1	0	0		0	0	7	1	1171	1171	1171	1171	122	68	159	7	3	0	0	0	0	0	1	2	1	1000	0	0	0	0
15767308	21300083	33181053	95	0	0	1	0	1	1	36	104	24	95	71	5	9	2	1	1	1	0	0		0	0	3	1	161	161	161	161	153	33	199	2	2	0	1	0	0	0	1	2	1	400	0	0	1	0
11344751	27728838	33181285	60	1	1	1	0	0	1	36	87	24	94	57	33	11	3	2	1	1	0	0		0	0	4	1	26236	41860	19090	29010	158	61	203	15	9	1	1	1	1	0	1	2	1	2000	0	0	0	0
16715995	27306673	33183723	30	0	0	0	0	0	0	37	94	32	97	71	11	12	1	3	1	1	0	0		0	0	3	1	13030	13030	13030	13030	131	178	170	7	7	1	1	1	1	0	1	2	1	2000	0	0	0	0
18518603	28910961	33186331	56	0	0	0	0	0	1	37	82	21	97	72	11	10	1	1	0	1	0	0		0	0	2	1	1261	1261	1261	1261	99	20	129	6	2	0	1	0	0	0	0	2	1	1200	0	0	0	0
12518542	20749096	33186659	79	0	0	0	0	1	1	37	100	22	94	73	11	9	1	1	1	1	1	0	0	0	1	2	1	1073	1073	1073	1073	185	30	241	10	8	0	1	0	0	0	1	2	1	1000	0	0	0	0
10627556	27965714	33189788	84	0	1	0	1	1	0	37	83	11	99	59	6	8	5	2	0	1	1	0	0	0	1	4	1	8031	8031	8031	8031	123	30	160	18	5	0	0	0	0	1	1	2	1	2000	0	0	0	0
14285792	23014125	33191040	48	0	0	0	0	0	1	36	75	20	96	83	11	8	0	3	1	1	1	1	1	0	0	4	1	1506	1506	1506	1506	68	107	88	64	15	0	0	0	0	1	1	2	1	1400	0	0	0	0
19193891	25790502	33193862	69	1	0	1	0	0	0	38	71	22	99	81	13	12	1	1	1	1	1	0	1	0	0	3	1	216	418	216	327	241	20	263	13	8	0	0	0	0	0	1	2	1	400	0	0	1	0
14602650	20104827	33198185	53	0	1	0	0	0	0	37	78	17	98	64	8	9	8	1	0	1	1	0	0	0	1	5	1	431	431	431	431	101	11	131	19	3	0	0	0	0	1	1	2	1	400	0	0	1	0
12661776	21453672	33206041	71	1	0	0	1	0	0	36	80	18	100	59	15	9	1	1	0	1	0	0		0	0	2	1	244	244	244	244	110	15	143	12	3	0	0	0	0	0	1	1	0	200	0	1	0	0
10614286	25272169	33206685	64	1	0	0	1	0	0	37	97	27	94	52	12	11	1	1	0	1	0	0		0	0	2	1	314	314	314	314	241	65	313	6	3	0	0	0	0	0	0	1	0	200	0	1	0	0
15861338	24054174	33211552	60	0	0	0	0	0	1	36	120	20	100	67	40	7	1	3	0	1	0	0		0	0	4	1	703	703	703	703	133	104	173	1	1	1	1	1	1	1	0	2	1	600	0	0	0	1
15049054	23597206	33211957	61	1	0	0	0	0	1	38	123	16	100	88	14	8	3	2	0	1	0	0		0	0	2	1	1804	1804	1804	1804	148	22	192	10	4	1	1	0	0	0	1	2	1	1800	0	0	0	0
13637699	29612379	33214455	26	0	0	0	0	0	1	36	86	20	100	65	4	10	2	4	0	0	0	0		0	0	4	1	1643	1643	1643	1643	153	42	199	30	26	0	0	0	0	1	1	2	1	1600	0	0	0	0
13625109	28043328	33217829	67	1	0	1	0	0	1	37	140	29	95	79	4	9	1	2	0	1	0	0		0	0	4	1	1479	1479	1479	1479	105	65	137	17	6	1	1	1	0	1	1	2	1	1400	0	0	0	0
17399377	27309502	33227606	66	0	1	1	0	0	1	37	69	20	94	84	13	13	1	1	1	1	0	0		0	0	2	1	51	51	51	51	281	48	365	15	11	0	1	0	0	1	1	1	0	200	0	1	0	0
18495283	26978248	33229559	67	1	0	0	1	0	1	37	105	25	100	71	21	7	1	1	1	1	0	0		0	0	2	1	26	26	26	26	196	78	255	4	4	1	1	0	0	1	1	1	0	200	0	1	0	0
12183714	23571759	33230724	36	0	0	0	0	0	1	36	124	18	100	81	2	13	1	2	0	1	1	1	0	1	1	4	1	2020	2020	2020	2020	83	12	108	121	38	0	0	0	0	1	1	2	1	2000	0	0	0	0
10708404	29149317	33241412	53	0	0	0	0	0	0	37	91	17	97	70	23	12	1	2	1	1	0	0		0	0	3	1	143	143	143	143	206	44	268	7	2	0	0	0	0	1	1	1	0	200	0	1	0	0
16455332	21734256	33242747	79	0	1	0	1	1	1	35	89	20	92	64	12	9	1	1	0	1	0	0		0	0	2	1	79	79	79	79	297	52	386	10	4	0	0	0	0	0	1	1	0	200	0	1	0	0
12993331	24909104	33243115	68	0	0	0	1	1	1	36	81	20	100	76	15	8	2	1	1	0	0	0		0	0	8	1	2392	2392	2392	2392	162	88	211	10	8	1	1	1	0	1	1	2	1	2000	0	0	0	0
14623418	23174937	33252495	64	0	0	0	0	0	0	36	85	12	100	77	5	9	1	2	0	1	0	0		0	0	3	1	3184	3184	3184	3184	52	78	68	6	6	1	1	1	1	1	1	2	1	2000	0	0	0	0
14353713	21137204	33254818	27	0	0	0	0	0	1	37	90	21	100	80	11	7	0	2	1	0	0	0		0	0	5	1	1948	1948	1948	1948	134	57	174	14	5	0	0	0	0	0	1	2	1	1800	0	0	0	0
13322057	25653494	33260521	84	0	0	0	0	0	0	36	49	10	100	79	8	10	2	1	1	1	0	0		0	0	5	1	270	285	270	278	146	40	190	26	21	0	0	0	0	0	1	2	1	400	0	0	1	0
12938515	23913983	33264536	47	0	0	1	0	1	1	37	83	21	100	66	19	8	6	2	0	1	0	0		0	0	12	1	2707	2707	2707	2707	50	71	65	45	14	0	1	0	0	1	1	2	1	2000	0	0	0	0
14096194	28037207	33266695	68	0	1	1	1	1	0	37	81	17	100	52	14	9	4	4	0	1	0	0		0	0	6	1	207	207	207	207	233	15	303	15	8	1	1	1	1	1	1	1	0	200	0	1	0	0
13352605	24335090	33268596	49	0	0	1	1	0	0	36	60	25	95	94	18	10	1	3	1	1	0	0		0	0	5	1	182	182	182	182	187	19	243	17	13	0	0	0	0	1	1	2	1	400	0	0	1	0
19605487	22932745	33280285	64	1	0	1	0	0	1	37	74	20	100	75	10	10	2	2	0	1	1	0	1	0	0	5	1	229	229	229	229	109	36	142	21	3	0	0	0	0	1	1	1	0	200	0	1	0	0
10039708	28258130	33281088	48	1	1	0	0	0	1	36	77	24	99	73	12	11	2	4	1	1	1	1	1	0	1	6	1	2448	2632	1085	2055	69	85	90	34	16	0	0	0	0	1	1	2	1	2000	0	0	0	0
18109512	20677407	33282248	27	0	0	0	0	0	0	38	140	16	99	85	18	10	0	2	1	0	1	0	1	0	1	2	1	559	559	559	559	43	5	56	46	4	0	0	0	0	0	1	2	1	400	0	0	1	0
15948134	25626503	33284819	42	0	0	0	0	0	0	35	109	24	99	50	10	10	5	3	0	1	0	0		0	0	7	1	1912	1912	1912	1912	75	133	98	3	3	1	1	1	1	1	1	2	1	1800	0	0	0	0
19188435	23075262	33290957	84	0	1	0	0	1	1	37	140	19	100	120	40	9	1	1	1	1	0	0		0	0	5	1	2339	2339	2339	2339	49	26	64	21	3	0	1	0	0	0	0	2	1	2000	0	0	0	0
17130867	28730947	33296875	52	0	1	0	0	1	0	39	113	28	91	121	3	8	1	2	1	0	1	0	1	0	0	6	1	131	131	131	131	517	43	672	60	8	0	0	0	0	1	1	1	0	200	0	1	0	0
18749871	24392565	33302944	57	0	0	0	0	0	0	37	53	17	95	86	11	10	1	1	1	1	0	0		0	0	3	1	3320	3320	3320	3320	137	160	178	11	2	0	0	0	0	0	0	2	1	2000	0	0	0	0
19111671	20720007	33304294	51	1	0	0	0	0	0	37	106	21	100	84	23	10	1	2	1	1	0	0		0	0	4	1	75	75	75	75	142	59	186	20	9	1	1	0	0	1	1	1	0	200	0	1	0	0
12736960	27860656	33316407	47	0	0	0	0	0	1	36	113	20	97	77	8	7	3	3	0	1	0	0		0	0	6	1	502	502	502	502	38	52	49	8	8	1	1	1	1	0	1	2	1	400	0	0	1	0
16723224	27780902	33319062	48	0	0	0	0	1	1	38	135	31	95	60	7	9	4	3	0	1	0	0		0	0	10	1	4960	4960	4960	4960	78	100	101	2	2	1	1	1	1	1	1	2	1	2000	0	0	0	0
19033304	26672250	33335968	52	0	0	0	0	0	1	37	120	12	93	93	9	9	1	4	0	1	0	0		0	0	2	1	87	87	87	87	168	21	218	9	4	0	0	0	0	0	1	1	0	200	0	1	0	0
11709188	20839624	33339147	49	1	0	0	0	0	1	37	90	21	97	93	5	8	1	2	1	1	0	0		0	0	2	1	253	253	253	253	166	67	217	28	3	0	0	0	0	0	1	2	1	400	0	0	1	0
17581403	26926846	33343245	76	0	0	0	0	0	1	37	93	20	97	69	6	9	2	1	0	1	1	0	1	0	0	16	1	4171	4171	4171	4171	101	64	135	14	9	1	1	1	1	1	1	2	1	2000	0	0	0	0
11315982	28762278	33345706	79	0	1	0	0	1	1	38	77	18	100	78	10	8	3	1	1	1	0	0		0	0	5	1	428	428	428	428	147	28	191	11	2	0	0	0	0	0	1	2	1	400	0	0	1	0
13013082	20950672	33346797	42	1	0	0	0	0	0	38	116	16	100	100	12	14	1	2	0	1	0	0		0	0	4	1	429	429	429	429	129	28	170	60	13	0	0	0	0	1	1	2	1	400	0	0	1	0
15284302	24915879	33348523	69	1	0	1	1	0	1	37	84	8	96	66	28	9	1	1	1	1	0	0		0	0	4	1	43	43	43	43	153	74	199	28	21	0	0	0	0	0	1	1	0	200	0	1	0	0
19688885	24789896	33350548	60	0	0	1	1	1	0	36	110	22	97	76	8	11	4	2	0	1	0	0		0	0	3	1	2095	3315	2095	2705	133	72	164	7	7	1	1	0	0	1	1	2	1	2000	0	0	0	0
14690121	23184351	33355529	37	0	0	0	0	0	1	37	65	16	100	57	6	10	1	2	1	1	0	0		0	0	2	1	98	98	98	98	161	14	209	10	4	0	0	0	0	0	1	1	0	200	0	1	0	0
13941091	23893442	33363560	19	0	1	0	0	0	0	36	49	12	93	72	9	13	1	2	0	1	0	0		0	0	2	1	96	96	96	96	272	55	354	17	5	0	0	0	0	0	0	1	0	200	0	1	0	0
12673210	21552777	33367644	54	0	0	1	0	0	1	37	87	24	100	82	34	10	1	4	0	1	1	0	0	0	1	4	1	40	40	40	40	131	61	170	17	17	1	1	0	0	1	1	1	0	200	0	1	0	0
14532717	22733404	33372819	71	0	1	0	1	1	1	36	102	17	97	71	12	11	3	4	0	1	0	0		0	0	4	1	236	236	196	216	144	23	187	5	5	1	1	1	1	1	1	1	0	200	0	1	0	0
18215356	22975642	33374412	91	1	1	0	1	0	0	37	92	19	95	74	8	13	1	2	0	1	0	0		0	0	5	1	306	306	306	306	201	58	261	15	3	0	0	0	0	0	1	1	0	200	0	1	0	0
13820022	21399290	33379036	58	1	0	0	1	0	0	38	70	19	98	101	18	15	1	2	0	1	1	1	0	0	0	3	1	722	722	722	722	202	19	263	30	12	0	0	0	0	0	1	2	1	600	0	0	0	1
12209212	22811886	33381407	28	0	0	0	0	0	0	39	93	24	96	72	10	9	1	2	1	1	0	0		0	0	4	1	137	137	137	137	168	68	219	11	5	0	0	0	0	0	1	1	0	200	0	1	0	0
11040157	23532447	33383218	53	0	0	0	0	0	1	37	64	24	100	82	8	8	1	2	1	1	1	1	0	0	0	7	1	879	879	879	879	49	59	64	26	7	1	1	1	0	0	1	2	1	800	0	0	0	0
16990881	23778782	33387255	62	1	1	1	1	0	0	38	107	27	95	78	14	13	1	1	0	1	0	0		0	0	7	1	223	223	223	223	166	9	216	10	5	0	0	0	0	1	1	1	0	200	0	1	0	0
18173252	25021447	33387367	82	0	1	1	1	0	1	37	58	22	95	52	11	8	2	1	1	1	0	0		0	0	4	1	41	41	41	41	311	17	404	8	1	1	1	0	0	0	0	1	0	200	0	1	0	0
11549070	25614632	33394539	69	0	0	0	0	1	1	37	89	14	99	92	7	8	4	3	0	1	1	0	1	1	0	3	1	1184	1184	1184	1184	128	93	166	23	1	1	1	1	0	0	1	2	1	1000	0	0	0	0
17488816	23326087	33398606	79	1	0	0	0	0	0	36	69	13	95	48	16	12	1	2	1	0	0	0		0	0	2	1	266	266	266	266	161	51	210	4	1	0	0	0	0	0	0	2	1	400	0	0	1	0
14780705	25561761	33398746	73	1	1	0	1	0	0	37	72	24	91	72	20	11	1	1	0	1	0	0		0	0	3	1	467	467	467	467	122	31	159	5	2	0	0	0	0	0	1	2	1	400	0	0	1	0
15348675	25740723	33400879	81	0	0	0	0	0	1	37	91	20	100	66	6	9	2	2	1	1	1	1	0	0	0	6	1	522	522	522	522	80	31	104	11	6	0	0	0	0	0	1	2	1	400	0	0	1	0
18898774	25251164	33403239	42	0	0	1	0	0	1	38	140	32	94	74	8	14	1	2	0	1	0	0		0	0	2	1	224	224	224	224	122	35	159	13	3	0	0	0	0	0	0	1	0	200	0	1	0	0
11461930	20686128	33403818	68	0	0	0	0	0	1	36	72	20	99	62	40	8	1	2	1	1	0	0		0	0	3	1	1335	1335	1335	1335	110	15	143	13	13	1	1	1	1	1	1	2	1	1200	0	0	0	0
19606878	21418595	33404420	61	0	0	0	0	0	1	36	113	24	95	85	21	8	2	2	0	1	0	0		0	0	3	1	133	133	133	133	175	47	228	10	4	0	0	0	0	0	0	1	0	200	0	1	0	0
13513122	20658061	33405350	29	0	1	0	0	1	1	37	108	23	100	116	11	8	8	2	1	1	0	0		0	0	5	1	1207	1207	1207	1207	201	76	261	9	4	0	0	0	0	0	1	2	1	1200	0	0	0	0
15147932	21065624	33408756	35	1	0	0	0	0	0	37	108	16	97	71	5	15	1	3	0	1	0	0		0	0	5	1	681	681	681	681	65	16	85	16	10	0	0	0	0	1	1	2	1	600	0	0	0	1
14701621	25880089	33410913	50	0	0	0	0	0	1	38	119	24	100	97	5	10	1	1	0	1	1	1	0	0	0	2	1	135	135	135	135	166	47	216	10	5	0	0	0	0	0	0	1	0	200	0	1	0	0
17177796	27071931	33416237	40	1	0	0	0	0	0	36	72	21	95	61	29	11	4	2	1	1	0	0		0	0	6	1	402	1274	293	656	150	126	282	6	6	1	1	1	1	1	1	2	1	400	0	0	1	0
15965724	23069346	33418900	64	0	0	0	0	1	1	38	115	20	95	88	15	8	1	1	0	1	1	0	0	1	0	4	1	4289	4289	4289	4289	138	58	182	15	16	1	1	1	1	0	1	2	1	2000	0	0	0	0
11171260	20920997	33426506	72	0	1	1	0	1	1	37	82	11	98	66	23	7	2	1	1	1	0	0		0	0	15	1	418	418	418	418	160	118	208	52	33	0	1	1	1	1	1	2	1	400	0	0	1	0
17754293	21086123	33429186	80	0	1	1	1	1	1	37	123	25	98	97	11	10	2	2	1	1	0	0		0	0	4	1	244	244	244	244	287	68	373	14	5	0	0	0	0	0	1	2	1	400	0	0	1	0
11919053	25557423	33429315	25	0	0	0	0	0	1	37	119	21	98	58	11	9	0	2	1	1	0	0		0	0	4	1	202	202	202	202	166	60	217	5	2	0	0	0	0	1	0	2	1	400	0	0	1	0
19844063	21935129	33429718	49	0	0	0	0	0	1	37	68	14	100	75	13	8	0	1	1	1	0	0		0	0	6	1	36	36	36	36	186	17	242	23	12	0	0	0	0	1	1	1	0	200	0	1	0	0
14254134	23236375	33439317	39	0	0	0	0	0	1	39	94	16	99	57	6	10	1	1	0	1	0	0		0	0	4	1	154	154	154	154	199	13	259	8	5	0	0	0	0	1	1	1	0	200	0	1	0	0
14453887	20236140	33441229	91	1	1	0	0	0	1	36	86	21	96	69	5	8	1	3	1	1	0	0		0	0	2	1	1149	1149	1149	1149	117	21	152	6	6	1	1	1	0	0	0	2	1	1000	0	0	0	0
16454295	26145732	33444947	43	0	0	1	0	1	1	37	75	33	100	81	22	9	3	2	1	0	1	0	1	0	0	4	1	2355	2355	2355	2355	118	69	153	26	8	0	0	0	0	0	1	2	1	2000	0	0	0	0
16802466	25897238	33445848	86	0	1	0	1	0	0	36	62	19	100	86	2	10	1	1	0	1	0	0		0	0	2	1	130	130	130	130	276	147	359	4	2	0	0	0	0	0	1	1	0	200	0	1	0	0
11259380	29230790	33447734	55	0	0	0	0	0	1	36	76	17	97	66	13	10	2	2	0	1	0	0		0	0	8	1	4423	4423	4423	4423	36	62	47	5	0	1	1	0	0	0	0	2	1	2000	0	0	0	0
10119992	27298430	33474714	78	0	1	1	1	1	1	34	79	24	100	83	9	7	5	2	0	1	0	0		0	0	5	1	314	314	314	314	191	174	248	15	4	1	1	1	0	0	0	1	0	200	0	1	0	0
10533554	20192903	33476578	88	0	1	0	0	0	0	38	82	25	94	67	14	9	1	2	1	1	1	1	0	0	0	2	1	692	692	692	692	144	21	187	14	3	1	1	1	0	1	1	2	1	600	0	0	0	1
17925279	29052335	33479947	74	0	1	1	1	1	1	37	81	19	98	59	11	12	2	1	0	1	1	0	1	0	0	2	1	98	98	98	98	256	35	333	38	38	0	1	0	0	1	1	1	0	200	0	1	0	0
16592058	22007481	33485591	71	0	1	0	0	0	0	36	110	18	86	78	10	12	2	2	0	1	0	0		0	0	2	1	80	80	80	80	191	26	248	13	6	0	0	0	0	0	1	1	0	200	0	1	0	0
19472959	26246214	33489691	43	0	0	0	0	0	1	37	92	24	100	64	17	10	1	3	0	1	1	1	0	0	0	3	1	2078	2078	2012	2045	100	53	130	13	5	1	1	0	0	0	1	2	1	2000	0	0	0	0
17509107	25893958	33499859	49	0	0	1	0	0	0	37	116	26	93	79	17	16	1	3	0	1	1	1	0	0	0	6	1	36963	41860	33281	35657	138	232	179	26	18	0	0	0	0	0	1	2	1	2000	0	0	0	0
18690742	23566255	33502331	40	1	0	0	0	0	1	38	102	30	99	65	17	11	1	2	0	1	0	0		0	0	2	1	627	627	627	627	117	34	152	24	2	0	0	0	0	0	1	2	1	600	0	0	0	1
11848891	20167478	33503279	39	0	0	0	0	0	0	38	115	20	100	62	3	12	2	4	0	1	1	0	0	0	1	5	1	914	976	914	945	90	63	72	30	12	0	0	0	0	0	1	2	1	800	0	0	0	0
17989258	26250905	33508622	57	1	0	0	0	0	0	36	78	24	100	99	20	12	2	4	0	1	1	1	0	0	0	14	1	21907	21907	21907	21907	95	139	124	9	9	1	1	1	1	1	1	2	1	2000	0	0	0	0
14124506	28877051	33525901	41	0	0	0	0	0	1	36	58	16	97	73	6	10	1	2	0	1	0	0		0	0	3	1	1989	1989	1989	1989	99	41	129	48	11	0	0	0	0	0	1	2	1	1800	0	0	0	0
11621360	24322608	33526114	81	1	1	0	0	0	1	37	49	19	96	61	8	9	1	1	1	1	0	0		0	0	2	1	472	472	472	472	170	34	221	8	6	0	0	0	0	0	1	2	1	400	0	0	1	0
18448263	28198323	33534698	46	0	0	0	0	0	0	37	104	18	94	63	15	6	1	1	1	1	0	0		0	0	6	1	4546	4546	3581	4064	151	53	197	10	3	1	1	0	0	0	0	2	1	2000	0	0	0	0
14500834	26985952	33550707	37	0	0	0	0	0	0	36	102	22	94	77	23	9	1	1	1	1	1	0	1	1	0	2	1	451	451	451	451	94	71	122	23	10	0	0	0	0	0	1	2	1	400	0	0	1	0
14228169	29566561	33551009	81	0	1	0	1	1	1	34	90	20	100	79	18	11	5	3	1	1	1	1	0	0	0	5	1	1028	1028	1028	1028	110	46	143	12	9	0	0	0	0	1	1	2	1	1000	0	0	0	0
19836795	25062453	33552034	70	0	1	0	1	1	1	38	77	20	94	53	18	11	1	2	1	1	1	1	1	0	0	9	1	1031	1031	1031	1031	87	22	233	52	40	0	1	0	0	1	1	2	1	1000	0	0	0	0
14807966	21265472	33560183	89	0	1	0	0	1	1	37	80	14	100	68	6	11	2	1	0	1	0	0		0	0	7	1	62	62	62	62	255	79	332	6	3	0	1	0	0	0	1	1	0	200	0	1	0	0
11681918	22473521	33562367	64	0	0	0	0	1	1	37	57	18	100	65	7	7	2	1	0	1	1	1	0	0	0	3	1	695	695	599	647	123	27	160	7	3	0	0	0	0	0	0	2	1	600	0	0	0	1
10089244	29469323	33563887	73	1	1	1	0	0	1	37	83	16	97	86	13	9	2	1	1	1	0	0		0	0	2	1	1255	1255	1255	1255	222	59	289	12	9	1	1	1	0	0	1	2	1	1200	0	0	0	0
12533268	21056201	33568844	31	0	0	0	0	0	1	38	106	17	100	87	7	9	1	1	0	1	0	0		0	0	2	1	46	46	46	46	167	60	217	5	3	0	0	0	0	0	0	1	0	200	0	1	0	0
18257244	21876518	33570158	52	0	0	0	0	0	1	37	99	21	95	59	17	10	0	3	1	1	0	0		0	0	7	1	3255	4216	3255	3736	122	137	159	29	5	0	0	0	0	0	1	2	1	2000	0	0	0	0
16167811	21412149	33571339	86	0	0	0	0	0	0	37	92	16	100	75	6	11	1	2	0	1	0	0		0	0	2	1	539	539	539	539	128	11	182	3	3	1	1	1	1	0	1	2	1	400	0	0	1	0
19624089	20969955	33576993	54	0	1	1	0	1	1	38	68	29	97	47	17	9	2	2	0	0	1	1	0	1	1	13	1	1353	2279	1353	1911	132	74	172	109	91	0	0	0	0	1	1	2	1	1200	0	0	0	0
18881392	21283019	33578426	59	0	0	0	0	1	1	36	140	23	100	70	7	8	4	1	1	1	1	0	1	0	0	4	1	278	278	278	278	87	168	113	26	14	0	0	0	0	0	1	2	1	400	0	0	1	0
15341255	26570928	33584871	77	0	1	1	1	1	1	39	119	16	100	68	17	11	4	1	0	0	0	0		0	0	2	1	1000	1000	1000	1000	170	16	221	17	10	0	0	0	0	1	1	2	1	1000	0	0	0	0
17782126	27304911	33586773	79	0	1	1	1	1	0	37	85	24	99	72	7	13	2	2	1	1	1	1	0	0	0	4	1	76	76	76	76	264	102	343	12	5	0	0	0	0	0	1	1	0	200	0	1	0	0
15788829	25423266	33592934	85	1	0	0	0	0	0	38	106	14	97	107	12	13	1	2	0	0	0	0		0	0	3	1	683	683	683	683	140	34	182	3	2	1	1	1	1	0	1	2	1	600	0	0	0	1
12407545	24927522	33594842	82	0	0	0	0	0	0	37	75	21	100	76	5	7	1	4	0	1	1	1	1	0	0	2	1	415	415	415	415	77	22	100	22	11	0	0	0	0	1	1	2	1	400	0	0	1	0
18569484	29107092	33596982	53	0	1	0	0	0	0	37	106	20	99	75	9	12	1	1	0	1	0	0		0	0	2	1	734	734	734	734	144	25	187	8	3	0	0	0	0	0	1	2	1	600	0	0	0	1
14928370	22332321	33598133	56	1	0	0	0	0	1	37	120	17	94	69	30	10	0	1	1	1	1	0	0	1	1	3	1	876	876	853	865	84	11	99	55	25	0	0	0	0	1	1	2	1	800	0	0	0	0
12232866	25281524	33600996	74	0	1	0	0	0	0	36	70	14	95	57	10	9	0	1	1	1	0	0		0	0	3	1	686	686	686	686	191	78	251	6	6	1	1	1	1	0	1	2	1	600	0	0	0	1
11814428	20298410	33604891	86	1	1	0	0	0	1	37	74	16	94	52	15	8	1	1	1	0	0	0		0	0	5	1	317	317	317	317	191	31	248	32	4	0	0	0	0	1	1	2	1	400	0	0	1	0
16602535	26437575	33608757	83	0	1	0	0	1	1	37	118	29	100	88	6	11	3	2	1	0	0	0		0	0	3	1	893	893	776	835	201	16	261	2	2	1	1	1	1	1	1	2	1	800	0	0	0	0
12114497	23036677	33617454	44	0	0	0	0	0	0	36	73	22	98	58	2	11	1	2	1	1	0	0		0	0	6	1	12004	12004	12004	12004	179	136	233	6	1	0	0	0	0	0	0	2	1	2000	0	0	0	0
12417537	23844951	33618654	61	1	0	0	0	0	1	37	91	21	95	84	6	13	1	1	0	1	0	0		0	0	4	1	292	292	292	292	210	186	273	5	1	0	0	0	0	0	1	1	0	200	0	1	0	0
15004553	24559094	33620396	95	0	0	0	0	1	1	37	65	25	99	72	16	8	1	1	1	1	0	0		0	0	2	1	146	146	146	146	155	11	202	14	2	0	0	0	0	0	0	1	0	200	0	1	0	0
16606885	24444941	33628020	64	1	0	0	0	0	1	37	87	35	98	69	9	8	1	2	1	0	1	0	1	0	0	5	1	5940	16969	5940	11455	175	43	228	15	3	1	1	1	1	1	1	2	1	2000	0	0	0	0
13731023	21179444	33630120	80	1	1	1	0	0	1	36	81	10	100	56	15	11	3	1	0	1	0	0		0	0	5	1	211	211	211	211	227	44	295	4	2	0	0	0	0	0	0	1	0	200	0	1	0	0
15306094	24623320	33631476	75	0	1	0	1	0	0	37	93	25	86	79	7	10	1	1	1	1	0	0		0	0	3	1	398	398	398	398	131	32	170	10	6	0	0	0	0	0	1	2	1	400	0	0	1	0
16768286	22290389	33636748	77	0	0	1	1	0	1	37	63	18	94	68	11	12	1	2	0	1	0	0		0	0	2	1	768	768	768	768	141	19	183	8	3	0	0	0	0	0	1	2	1	600	0	0	0	1
15093989	26840499	33638538	69	1	0	1	0	0	1	37	94	15	95	79	7	8	2	2	0	1	0	0		0	0	12	1	123	123	90	107	102	25	133	12	7	1	1	0	0	1	0	1	0	200	0	1	0	0
12504496	21146531	33641076	70	0	0	1	0	1	0	37	92	18	100	93	5	8	5	2	0	1	0	0		0	0	4	1	316	318	316	317	77	10	100	14	1	1	1	0	0	0	0	1	0	200	0	1	0	0
19235707	26941902	33645153	27	0	1	0	0	0	1	36	137	37	95	81	9	7	1	2	0	1	0	0		0	0	2	1	896	896	896	896	212	58	276	23	17	1	1	1	0	0	1	2	1	800	0	0	0	0
10216556	23888667	33650320	61	0	0	1	1	0	0	37	65	13	100	73	3	9	8	2	0	1	0	0		0	0	8	1	220	220	220	220	154	22	200	14	5	0	0	0	0	0	1	1	0	200	0	1	0	0
18499078	27964902	33660280	57	0	1	0	0	0	0	34	91	30	98	67	13	12	2	3	1	1	0	0		0	0	3	1	1664	1664	1664	1664	194	165	252	1	1	1	1	1	1	1	1	2	1	1600	0	0	0	0
15457168	22738263	33667563	46	0	0	1	0	0	1	38	120	16	100	90	10	9	1	2	0	0	1	0	0	0	1	4	1	1769	1769	1769	1769	74	27	96	19	19	0	1	0	0	1	1	2	1	1600	0	0	0	0
17002456	29913195	33668510	83	0	1	1	1	0	0	37	95	20	100	72	13	11	1	2	0	1	1	0	0	0	1	3	1	81	81	81	81	162	37	211	11	3	0	0	0	0	0	1	1	0	200	0	1	0	0
16131803	26443582	33669592	92	1	1	0	0	0	1	37	114	32	91	69	24	11	1	3	1	1	1	0	1	0	0	2	1	98	98	98	98	232	9	302	18	3	0	0	0	0	0	1	1	0	200	0	1	0	0
15048265	27980834	33671496	79	0	0	0	0	0	0	38	64	20	100	58	11	8	1	1	1	1	0	0		0	0	2	1	346	346	346	346	108	13	140	10	5	0	0	0	0	0	1	2	1	400	0	0	1	0
19897344	23853450	33674041	74	0	0	0	0	0	0	37	106	17	94	58	14	11	0	1	1	1	0	0		0	0	4	1	796	796	796	796	110	53	147	7	7	1	1	1	1	1	1	2	1	600	0	0	0	1
13043084	22333489	33682025	37	1	0	0	0	0	1	37	90	22	90	107	9	12	1	1	0	0	0	0		0	0	2	1	6229	6229	6229	6229	175	64	227	8	4	0	0	0	0	0	0	2	1	2000	0	0	0	0
17275708	24874523	33691194	84	0	1	0	0	1	0	36	60	18	97	91	9	10	1	2	0	1	1	1	0	0	0	4	1	109	109	109	109	186	28	242	12	12	1	1	1	1	0	1	1	0	200	0	1	0	0
12872850	23826679	33698877	64	1	0	1	0	0	1	37	101	27	97	81	8	11	1	1	1	1	0	0		0	0	3	1	64	64	64	64	204	17	265	3	1	0	0	0	0	0	0	1	0	200	0	1	0	0
19363040	23995676	33703415	54	1	0	1	0	0	0	36	103	32	97	109	16	10	1	1	1	1	0	0		0	0	2	1	14935	14935	14935	14935	196	259	255	7	2	0	0	0	0	0	0	2	1	2000	0	0	0	0
14095904	23815897	33708079	62	0	1	1	1	0	0	37	70	25	89	60	14	11	1	1	0	1	0	0		0	0	4	1	152	152	152	152	235	37	306	1	1	1	1	1	1	1	0	1	0	200	0	1	0	0
16310288	24767739	33708180	75	1	0	0	1	0	1	37	88	18	86	49	13	12	3	2	0	1	0	0		0	0	6	1	176	176	176	176	228	53	296	11	9	0	0	0	0	1	1	1	0	200	0	1	0	0
18881064	25867458	33711333	64	0	0	0	0	0	0	37	75	18	100	71	9	10	0	1	1	1	0	0		0	0	2	1	122	122	122	122	239	127	311	16	8	0	0	0	0	0	1	1	0	200	0	1	0	0
17006822	23737981	33715014	57	1	0	0	0	0	0	39	133	11	98	63	6	9	3	2	1	1	0	0		0	0	7	1	1501	1501	1501	1501	125	15	163	5	5	1	1	1	1	0	1	2	1	1400	0	0	0	0
15481731	29449120	33718188	50	0	0	0	0	0	1	38	93	28	94	60	13	7	1	1	0	1	1	1	0	0	0	5	1	95	95	95	95	173	23	225	35	10	0	1	0	0	1	0	1	0	200	0	1	0	0
16270701	23499835	33721156	86	0	1	1	0	1	1	36	88	13	98	74	7	10	2	1	1	0	0	0		0	0	2	1	219	219	219	219	144	17	187	11	4	0	0	0	0	0	1	2	1	400	0	0	1	0
18896613	21855159	33721917	80	0	1	1	0	1	0	37	70	30	100	58	13	11	3	1	0	1	0	0		0	0	3	1	235	235	235	235	122	42	159	13	7	0	0	0	0	0	1	1	0	200	0	1	0	0
12668698	29124258	33733648	73	1	0	1	0	0	1	38	74	20	100	66	12	11	2	2	0	1	0	0		0	0	2	1	151	151	151	151	194	105	252	18	13	1	1	0	0	0	1	1	0	200	0	1	0	0
14789632	24981113	33736091	83	0	1	1	0	0	1	37	68	15	95	64	3	8	1	1	0	0	0	0		0	0	3	1	89	89	89	89	153	81	199	6	2	0	0	0	0	0	1	1	0	200	0	1	0	0
13298735	22128620	33738070	59	0	0	0	0	0	1	37	79	16	100	74	8	9	6	2	1	1	0	0		0	0	4	1	196	196	196	196	177	126	230	9	4	1	1	0	0	0	1	2	1	400	0	0	1	0
19404187	25117534	33745029	60	1	0	0	1	0	0	37	91	17	100	77	10	9	1	2	0	1	0	0		0	0	2	1	177	177	177	177	109	129	142	12	6	0	0	0	0	0	0	1	0	200	0	1	0	0
18907826	25735838	33749076	89	1	0	1	1	0	1	37	102	13	96	74	24	9	1	3	1	1	0	0		0	0	7	1	1079	1079	1079	1079	56	8	73	1	1	1	1	1	1	1	1	2	1	1000	0	0	0	0
18653828	21577787	33750354	89	1	0	0	0	0	0	35	89	17	100	72	13	10	1	2	1	1	0	0		0	0	2	1	335	335	335	335	42	17	55	9	9	1	1	1	1	0	1	2	1	400	0	0	1	0
15027886	26786113	33751102	59	0	0	0	0	0	0	35	113	30	93	81	2	11	1	3	0	1	1	1	0	0	0	9	1	739	1539	508	965	149	24	194	26	26	0	0	0	0	1	1	2	1	600	0	0	0	1
19757720	27547009	33753692	79	0	1	1	1	1	1	36	96	26	90	53	8	7	7	1	0	1	0	0		0	0	2	1	198	198	198	198	146	23	190	11	11	1	1	1	1	0	1	1	0	200	0	1	0	0
18937272	22474799	33754407	92	0	0	0	0	0	1	37	79	15	98	60	12	8	1	2	1	1	0	0		0	0	3	1	16	16	16	16	249	29	324	3	1	0	0	0	0	0	0	1	0	200	0	1	0	0
16030932	23928900	33755025	85	0	0	1	0	1	1	36	81	28	95	58	19	8	3	2	1	1	0	0		0	0	3	1	529	529	529	529	76	29	99	5	2	0	0	0	0	1	1	2	1	400	0	0	1	0
11338933	26121909	33762278	85	1	0	0	0	0	0	36	88	13	99	93	8	11	1	2	0	0	1	0	1	0	0	3	1	404	404	404	404	210	32	273	15	5	0	0	0	0	0	1	2	1	400	0	0	1	0
14112048	20885792	33762516	48	0	1	0	0	0	1	37	96	18	96	81	19	8	1	3	0	1	0	0		0	0	5	1	167	167	167	167	286	40	372	19	9	0	0	0	0	1	1	1	0	200	0	1	0	0
10840816	29889994	33763417	80	1	1	0	1	0	0	37	97	30	96	102	19	8	1	1	0	1	1	0	0	1	0	3	1	1998	1998	1998	1998	110	13	143	35	30	0	1	0	0	0	1	2	1	1800	0	0	0	0
11462863	22106219	33765335	57	0	1	0	1	0	1	37	75	22	97	79	15	13	1	2	0	1	0	0		0	0	5	1	181	181	181	181	232	60	302	9	3	0	0	0	0	1	1	1	0	200	0	1	0	0
19015092	20250010	33765866	20	0	0	0	0	0	0	37	103	30	94	119	14	10	1	2	1	0	1	0	1	0	0	6	1	3497	4863	3497	4353	151	70	198	48	10	0	0	0	0	0	0	2	1	2000	0	0	0	0
15957311	28871772	33772157	52	0	0	0	0	0	0	37	52	18	96	88	3	12	1	2	0	1	0	0		0	0	4	1	1017	1017	1017	1017	147	168	191	3	2	0	0	0	0	0	0	2	1	1000	0	0	0	0
19442119	29531980	33773008	91	1	0	1	1	0	1	37	84	16	97	66	11	8	1	2	0	1	1	0	0	0	0	2	1	117	117	117	117	182	29	237	18	18	1	1	1	1	1	1	1	0	200	0	1	0	0
19648225	25180813	33777231	66	0	0	0	0	1	0	36	84	11	100	84	7	7	8	1	1	1	0	0		0	0	4	1	215	215	215	215	168	147	218	3	1	0	0	0	0	0	1	2	1	400	0	0	1	0
17801698	29544420	33778846	21	0	0	0	0	0	1	36	78	23	94	65	12	11	1	2	0	1	0	0		0	0	4	1	269	269	269	269	133	8	173	5	2	0	0	0	0	1	0	1	0	200	0	1	0	0
14785071	21445817	33781762	65	0	0	0	1	0	1	38	116	18	96	87	5	9	1	1	0	1	0	0		0	0	4	1	59	59	59	59	141	14	183	10	7	0	0	0	0	0	1	1	0	200	0	1	0	0
17698131	29333122	33782166	23	0	0	0	0	0	0	39	110	16	100	80	10	13	1	2	0	1	0	0		0	0	4	1	515	1005	515	760	122	53	159	7	2	0	0	0	0	1	0	2	1	400	0	0	1	0
15587198	24574896	33794616	82	0	1	1	1	1	1	38	96	24	100	77	9	7	2	1	0	1	0	0		0	0	6	1	98	98	98	98	273	36	355	8	8	1	1	1	1	1	1	1	0	200	0	1	0	0
16440399	28626906	33795907	59	1	0	1	0	0	1	37	102	11	96	77	20	7	2	2	0	1	0	0		0	0	2	1	922	922	922	922	139	14	181	7	6	0	0	0	0	0	0	2	1	800	0	0	0	0
18207922	20174128	33800886	84	1	0	0	0	0	1	36	70	25	99	83	23	10	1	1	1	1	1	1	0	0	0	3	1	129	129	129	129	105	46	137	20	16	1	1	0	0	0	1	1	0	200	0	1	0	0
19286379	28474887	33804332	65	0	1	1	0	0	1	38	134	14	99	94	22	9	3	4	1	1	0	0		0	0	7	1	5616	5616	5616	5616	101	46	131	3	3	1	1	1	1	1	1	2	1	2000	0	0	0	0
11101925	23866136	33806430	57	1	0	0	0	0	0	37	84	17	100	52	11	8	0	2	1	1	0	0		0	0	5	1	1120	1120	1120	1120	287	139	373	5	5	0	1	0	0	0	1	2	1	1000	0	0	0	0
10331939	24567486	33807006	58	0	1	0	1	0	0	34	76	18	100	90	8	16	1	2	0	1	1	1	0	0	0	2	1	280	280	280	280	188	25	244	7	3	0	0	0	0	1	1	1	0	200	0	1	0	0
16112144	26274571	33809011	58	0	0	0	0	1	1	36	85	16	98	109	10	9	8	1	0	1	0	0		0	0	4	1	586	586	586	586	144	17	187	7	1	0	0	0	0	0	1	2	1	400	0	0	1	0
11064566	26586602	33809090	76	0	0	0	0	0	1	38	71	19	100	59	7	11	1	2	0	1	1	1	0	0	0	2	1	1841	1841	1841	1841	181	15	222	15	15	0	0	0	0	0	1	2	1	1800	0	0	0	0
19557539	21851483	33812247	91	1	0	1	0	0	1	37	66	15	100	45	15	10	1	1	1	1	1	1	0	0	0	2	1	183	183	183	183	159	60	207	7	6	1	1	1	0	1	1	2	1	400	0	0	1	0
15165602	21829622	33816624	73	1	1	0	0	0	0	37	105	25	92	61	6	9	1	1	1	1	0	0		0	0	2	1	248	248	248	248	179	37	233	12	2	0	0	0	0	0	0	2	1	400	0	0	1	0
15219971	23524079	33816926	50	0	1	0	0	0	0	37	93	20	99	62	6	8	1	1	1	1	1	1	0	0	0	4	1	111	111	111	111	114	9	148	9	7	0	0	0	0	0	0	1	0	200	0	1	0	0
18567547	29034596	33817347	60	0	0	0	0	1	1	37	78	18	96	86	4	14	8	2	0	1	0	0		0	0	14	1	36963	37660	33281	35657	90	124	117	33	9	0	0	0	0	1	1	2	1	2000	0	0	0	0
18489085	28523084	33819586	81	1	1	1	1	0	1	38	87	28	97	65	9	8	1	1	0	1	0	0		0	0	3	1	512	512	512	512	144	41	187	15	10	1	1	1	1	0	0	2	1	400	0	0	1	0
12708439	21241537	33823633	51	1	0	0	0	0	1	37	86	12	100	64	16	6	1	2	0	0	1	0	0	0	1	5	1	165	165	165	165	198	79	257	15	3	0	0	0	0	0	1	1	0	200	0	1	0	0
16922254	25787700	33828415	61	0	0	0	1	0	1	37	138	24	100	75	25	14	2	4	0	1	0	0		0	0	4	1	23062	23062	23062	23062	120	173	156	3	3	0	1	0	0	1	1	2	1	2000	0	0	0	0
13306211	20767877	33830370	92	1	1	0	0	0	0	36	73	23	97	76	6	11	0	2	1	1	0	0		0	0	3	1	258	258	258	258	125	17	163	3	1	0	0	0	0	1	0	2	1	400	0	0	1	0
18937064	28173737	33831159	75	0	1	1	0	1	1	36	83	17	99	71	9	7	4	1	0	1	0	0		0	0	4	1	911	911	911	911	160	59	208	8	2	0	0	0	0	1	1	2	1	800	0	0	0	0
10843264	21138329	33832185	74	0	1	0	0	1	1	37	75	22	100	65	7	8	1	1	1	1	0	0		0	0	3	1	66	66	66	66	198	16	257	20	7	0	0	0	0	0	1	1	0	200	0	1	0	0
15796335	28186962	33835780	27	0	0	0	0	0	0	39	109	26	100	72	12	16	2	2	0	1	1	1	0	1	0	4	1	15308	15308	493	5449	170	225	221	34	34	0	1	1	1	1	1	2	1	2000	0	0	0	0
16890228	26132847	33836245	62	1	0	0	0	0	1	39	113	33	99	85	26	8	2	2	0	1	0	0		0	0	3	1	513	513	513	513	148	14	192	14	2	0	0	0	0	0	1	2	1	400	0	0	1	0
14533193	23190297	33839862	37	0	0	0	0	0	1	37	107	28	91	71	27	8	1	2	0	1	0	0		0	0	3	1	36963	41860	33281	35657	109	186	142	4	4	1	1	1	1	1	1	2	1	2000	0	0	0	0
18303502	23918278	33840050	45	0	0	0	0	0	1	37	76	21	99	87	13	12	1	1	1	1	0	0		0	0	4	1	293	293	293	293	193	19	251	9	6	0	0	0	0	1	0	2	1	400	0	0	1	0
16510917	24706814	33841563	69	0	0	1	0	1	1	37	99	19	97	103	5	8	1	1	1	1	1	0	0	0	1	3	1	285	285	285	285	141	171	183	11	1	0	0	0	0	0	0	2	1	400	0	0	1	0
17035032	20936833	33845000	58	0	0	0	0	0	1	39	125	22	100	75	8	9	1	2	0	1	0	0		0	0	2	1	76	76	76	76	192	19	250	4	3	0	1	0	0	0	1	1	0	200	0	1	0	0
10965894	23403844	33853516	69	0	1	1	0	1	1	37	93	27	98	120	25	8	2	4	0	1	0	0		0	0	7	1	7464	7464	1776	4620	196	263	402	48	15	0	1	1	0	0	1	2	1	2000	0	0	0	0
12611824	22999606	33856536	65	0	1	1	1	1	1	37	67	14	98	72	19	7	4	1	0	1	0	0		0	0	4	1	3077	3077	3077	3077	62	13	81	10	2	0	0	0	0	0	1	2	1	2000	0	0	0	0
15479218	28411600	33861571	88	1	0	0	0	0	0	39	104	32	97	66	14	10	1	2	0	1	1	1	1	0	1	4	1	1947	1947	1947	1947	88	46	114	94	25	0	0	0	0	0	1	2	1	1800	0	0	0	0
12173207	29634000	33862863	39	1	0	0	0	0	0	38	93	15	92	82	25	14	1	1	1	1	1	1	0	0	1	5	1	1309	1309	1309	1309	147	42	192	26	19	0	0	0	0	1	1	2	1	1200	0	0	0	0
14033551	25429490	33864717	90	0	1	1	1	1	1	37	55	22	95	93	8	9	4	2	0	1	0	0		0	0	5	1	265	265	265	265	205	46	267	7	4	1	1	0	0	0	1	1	0	200	0	1	0	0
11057464	23467550	33868624	57	0	0	0	0	0	0	36	99	17	100	70	6	10	1	2	1	1	0	0		0	0	6	1	1389	1389	1389	1389	107	129	139	13	5	1	1	0	0	0	1	2	1	1200	0	0	0	0
16198286	20627344	33870409	70	1	0	1	0	0	0	36	83	19	97	76	15	10	0	1	1	1	0	0		0	0	2	1	175	175	172	174	147	15	191	13	13	1	1	1	1	0	1	2	1	400	0	0	1	0
19348963	28725876	33871332	61	1	0	0	0	0	0	37	97	22	98	108	9	9	1	1	0	1	1	0	0	1	0	2	1	246	246	246	246	185	19	241	4	2	0	0	0	0	0	0	1	0	200	0	1	0	0
16487303	20727024	33875677	67	1	0	0	1	0	0	39	99	37	98	57	4	10	1	3	1	1	1	1	0	0	0	6	1	1468	1468	1468	1468	159	15	207	14	9	1	1	0	0	0	1	2	1	1400	0	0	0	0
16998152	20389490	33878496	47	0	0	0	0	0	1	36	72	10	100	64	15	8	7	2	0	1	0	0		0	0	10	1	1628	1628	1628	1628	126	157	164	31	2	0	0	0	0	0	1	2	1	1600	0	0	0	0
17960779	23788641	33882599	46	0	0	0	0	0	0	37	108	15	100	75	3	7	2	2	1	1	0	0		0	0	5	1	36963	41860	33281	35657	118	106	153	1	1	1	1	1	1	1	1	2	1	2000	0	0	0	0
19768138	27219490	33883845	49	0	0	0	0	0	1	38	67	11	97	72	9	8	1	1	0	1	0	0		0	0	4	1	397	397	397	397	136	12	177	26	2	0	0	0	0	0	0	1	0	200	0	1	0	0
18167770	21331058	33884628	60	0	0	0	0	0	1	37	93	26	95	76	38	8	2	3	0	1	0	0		0	0	5	1	931	931	931	931	66	108	86	20	13	0	1	0	0	1	1	2	1	800	0	0	0	0
14802944	29690551	33892842	87	1	0	0	0	0	1	37	102	30	95	68	28	9	1	2	1	1	1	0	1	0	1	2	1	16	16	16	16	247	193	321	6	3	0	0	0	0	0	0	1	0	200	0	1	0	0
12065081	24571829	33897581	62	0	1	0	1	0	1	36	76	21	96	68	12	9	1	2	1	0	0	0		0	0	2	1	137	137	137	137	237	16	308	15	12	0	0	0	0	1	1	1	0	200	0	1	0	0
18145106	29791829	33900840	49	0	0	0	0	0	1	37	110	20	100	74	28	6	4	2	0	1	0	0		0	0	2	1	135	135	135	135	287	11	373	6	3	1	1	0	0	0	1	1	0	200	0	1	0	0
15725489	26713478	33901971	76	0	1	0	1	0	1	37	80	13	100	50	6	7	1	1	0	1	0	0		0	0	2	1	84	84	84	84	171	31	222	11	1	0	0	0	0	0	0	1	0	200	0	1	0	0
17246790	27957361	33910522	80	0	1	1	0	1	0	37	92	18	96	77	14	12	3	4	0	1	1	0	1	0	0	9	1	1687	1687	1687	1687	159	55	203	29	4	0	0	0	0	1	1	2	1	1600	0	0	0	0
13085252	27367766	33911293	69	1	1	0	0	0	1	37	89	24	95	87	3	10	1	2	0	0	0	0		0	0	3	1	343	343	343	343	165	26	215	11	4	0	0	0	0	0	1	1	0	200	0	1	0	0
14136254	22060101	33915542	59	1	0	0	0	0	1	37	117	18	95	73	5	7	1	2	0	1	0	0		0	0	8	1	501	501	501	501	92	37	120	11	3	0	0	0	0	1	1	2	1	400	0	0	1	0
15823580	23113092	33916163	49	0	0	0	1	0	1	38	90	22	95	67	8	8	1	1	1	0	0	0		0	0	3	1	892	892	892	892	137	26	178	30	9	0	0	0	0	0	1	2	1	800	0	0	0	0
12487543	29175120	33920310	44	1	0	0	0	0	0	37	112	31	96	104	6	16	1	2	0	1	0	0		0	0	8	1	1069	1069	1069	1069	83	113	108	13	13	1	1	1	1	0	1	2	1	1000	0	0	0	0
15510824	22067227	33922130	35	0	0	0	0	0	0	37	140	22	98	94	40	16	2	3	1	1	0	0		0	0	4	1	2616	2616	2616	2616	111	146	144	4	4	1	1	1	1	1	1	2	1	2000	0	0	0	0
14283789	23055553	33927703	39	0	0	0	0	0	0	36	112	23	88	75	3	7	4	3	1	1	0	0		0	0	16	1	840	840	840	840	145	142	189	1	1	1	1	1	1	1	1	2	1	800	0	0	0	0
10957398	20353533	33928870	74	0	0	1	0	1	0	38	72	19	100	76	17	9	2	1	0	1	0	0		0	0	2	1	375	375	375	375	99	15	129	15	15	0	0	0	0	0	1	1	0	200	0	1	0	0
18043096	23762130	33929237	83	0	0	1	1	1	1	37	73	19	100	64	22	11	6	2	0	1	1	1	0	0	0	11	1	3606	3606	3606	3606	120	22	156	12	12	1	1	1	1	1	1	2	1	2000	0	0	0	0
16921998	26013203	33930962	35	0	0	0	0	0	0	37	70	13	100	81	14	12	4	1	0	1	0	0		0	0	8	1	17301	17301	17301	17301	166	227	216	15	9	0	0	0	0	0	1	2	1	2000	0	0	0	0
13316795	25609562	33932444	92	0	0	1	0	1	1	37	72	11	100	68	8	7	2	1	1	1	1	0	1	0	0	3	1	47	47	47	47	174	144	226	4	1	0	1	0	0	0	1	1	0	200	0	1	0	0
12953330	23826002	33934932	56	0	0	1	0	1	1	37	67	17	100	98	16	8	8	2	0	0	0	0		0	0	4	1	125	125	125	125	210	72	273	39	15	0	0	0	0	0	1	1	0	200	0	1	0	0
18716705	28103565	33936991	47	0	0	0	0	0	1	37	81	15	97	60	9	9	2	2	0	1	0	0		0	0	8	1	1152	1152	1152	1152	115	162	150	5	5	1	1	1	1	0	1	2	1	1000	0	0	0	0
10338515	23396807	33947001	53	0	1	0	1	1	1	37	95	21	93	88	14	9	3	3	0	1	0	0		0	0	3	1	105	105	105	105	216	22	281	8	1	0	0	0	0	1	1	1	0	200	0	1	0	0
16359591	20197905	33950095	92	0	1	1	0	1	0	37	87	22	96	62	31	11	4	2	0	1	1	1	0	0	0	3	1	1064	1064	1064	1064	61	16	79	23	20	1	1	1	1	0	1	2	1	1000	0	0	0	0
11121168	26907315	33950371	80	1	0	1	1	0	0	37	88	24	96	77	13	10	1	1	1	0	1	0	1	0	0	4	1	635	635	635	635	153	22	199	14	10	0	0	0	0	0	1	2	1	600	0	0	0	1
18473296	26998331	33950991	79	1	0	0	0	0	0	37	108	23	92	58	7	7	0	3	1	1	1	0	0	0	1	6	1	893	893	893	893	100	25	130	9	9	1	1	1	1	0	1	2	1	800	0	0	0	0
16199928	29832065	33958927	59	0	1	0	0	0	0	36	137	25	95	121	16	14	2	3	0	1	0	0		0	0	5	1	1254	1254	1254	1254	235	60	306	18	12	0	0	0	0	1	1	2	1	1200	0	0	0	0
19509694	28064529	33964764	52	0	1	1	0	0	0	37	118	37	99	79	11	11	1	1	0	1	0	0		0	0	3	1	679	679	679	679	156	56	203	9	6	0	0	0	0	1	1	2	1	600	0	0	0	1
16281227	21857925	33967321	80	0	1	1	0	0	0	36	70	17	97	68	12	10	1	2	1	1	0	0		0	0	2	1	309	309	309	309	207	29	269	4	2	0	0	0	0	0	1	2	1	400	0	0	1	0
10708243	21431732	33967808	80	1	0	0	0	0	1	37	86	14	100	62	11	9	1	2	0	1	0	0		0	0	2	1	988	988	988	988	105	45	137	21	13	0	0	0	0	0	1	2	1	800	0	0	0	0
18775048	28670288	33978056	83	0	0	1	0	0	1	38	110	34	94	109	16	14	1	2	0	1	1	1	0	0	0	4	1	680	680	680	680	132	53	172	36	9	0	1	0	0	0	1	2	1	600	0	0	0	1
14276582	26997248	33981715	51	0	0	0	0	0	0	37	77	21	97	60	6	10	1	2	1	1	1	0	1	0	0	9	1	121	121	121	121	114	129	148	16	3	1	1	1	0	1	0	1	0	200	0	1	0	0
13350724	26551913	33991123	82	1	1	0	0	0	1	36	95	23	100	49	12	9	1	2	1	0	1	0	1	1	0	2	1	417	417	417	417	72	9	94	48	2	0	0	0	0	0	1	2	1	400	0	0	1	0
11179416	23643972	33992543	36	0	0	0	0	0	1	38	97	15	99	79	8	9	1	1	1	1	0	0		0	0	3	1	35	35	35	35	308	18	400	4	1	0	0	0	0	0	0	1	0	200	0	1	0	0
13506251	28279742	33997505	77	1	1	1	1	0	0	37	75	22	97	81	4	11	2	2	0	1	0	0		0	0	11	1	214	214	214	214	159	31	207	5	5	1	1	1	1	1	1	1	0	200	0	1	0	0
15180359	24885509	34003859	64	0	0	0	0	0	0	39	114	26	98	66	1	8	1	3	0	1	1	1	0	0	0	6	1	6170	10486	6170	8328	130	107	169	27	10	0	0	0	0	1	1	2	1	2000	0	0	0	0
12229726	21406958	34010931	83	1	0	0	0	0	0	36	55	16	97	59	11	12	1	2	0	1	0	0		0	0	3	1	700	700	700	700	126	24	164	4	1	0	0	0	0	1	1	2	1	600	0	0	0	1
16143643	25087784	34011689	79	1	0	0	0	0	1	38	82	25	99	63	13	9	1	2	1	1	0	0		0	0	5	1	88	88	88	88	167	14	217	11	3	0	0	0	0	1	1	1	0	200	0	1	0	0
10680402	27625137	34014186	21	0	1	0	0	0	1	37	112	19	98	67	40	10	1	4	0	1	0	0		0	0	4	1	3420	5951	1568	3769	105	26	137	10	4	0	0	0	0	1	0	2	1	2000	0	0	0	0
19163592	27981459	34017902	67	0	0	0	0	0	1	37	113	26	86	66	13	8	1	2	1	1	0	0		0	0	2	1	936	936	936	936	122	19	159	4	1	0	0	0	0	0	1	2	1	800	0	0	0	0
14468223	21748144	34018610	31	0	0	0	0	0	0	38	115	17	100	89	1	9	1	2	1	1	0	0		0	0	3	1	322	322	322	322	163	61	214	12	6	0	0	0	0	1	0	2	1	400	0	0	1	0
18037163	26697866	34019922	28	1	0	0	0	0	1	37	94	11	98	83	9	9	1	3	0	1	0	0		0	0	2	1	2249	2249	2249	2249	195	234	254	29	3	0	0	0	0	0	0	2	1	2000	0	0	0	0
12878251	22698789	34023090	91	0	0	0	0	0	1	37	82	30	99	67	20	8	1	1	1	1	1	0	0	0	1	2	1	72	72	72	72	153	34	200	9	7	0	1	0	0	0	1	1	0	200	0	1	0	0
12822417	29370917	34028253	51	0	1	1	1	0	0	37	93	22	94	80	17	16	2	2	0	1	0	0		0	0	3	1	443	443	443	443	177	42	225	14	10	0	0	0	0	1	1	2	1	400	0	0	1	0
15675070	25828245	34030023	44	0	0	0	0	1	1	36	113	21	100	47	6	7	6	2	0	1	1	0	0	1	0	14	1	2403	2403	2403	2403	88	75	118	20	20	1	1	1	1	1	1	2	1	2000	0	0	0	0
10388400	23303089	34033218	75	1	1	0	0	0	1	37	122	18	100	74	15	7	2	1	1	1	1	0	1	0	0	3	1	234	234	234	234	169	33	223	52	4	0	0	0	0	1	1	2	1	400	0	0	1	0
13512648	25653583	34034832	70	0	1	0	0	0	1	37	105	24	93	79	10	11	1	1	1	1	0	0		0	0	2	1	63	63	63	63	136	52	177	22	16	0	0	0	0	0	1	1	0	200	0	1	0	0
14020103	25074260	34035988	84	0	1	0	1	1	1	37	94	32	92	74	28	9	1	2	1	0	0	0		0	0	2	1	1419	1419	1419	1419	165	24	215	18	18	1	1	1	1	0	1	2	1	1400	0	0	0	0
12435599	22279783	34036003	58	1	0	0	0	0	1	37	88	14	95	87	7	10	6	1	1	1	0	0		0	0	4	1	1227	1227	1227	1227	126	62	164	7	2	0	0	0	0	0	1	2	1	1200	0	0	0	0
16780307	25876434	34041934	61	0	0	1	0	0	1	37	74	13	100	91	4	8	1	1	0	1	0	0		0	0	3	1	8254	8254	8254	8254	79	31	103	20	3	1	1	1	0	1	0	2	1	2000	0	0	0	0
14482820	27174063	34043413	89	1	0	1	1	0	1	37	112	22	96	98	19	15	1	4	1	1	1	0	1	0	0	5	1	473	473	473	473	156	15	203	17	8	0	1	0	0	1	1	2	1	400	0	0	1	0
18152377	24517143	34044852	55	0	0	0	0	0	0	39	122	36	96	109	21	10	2	3	1	1	1	1	0	0	0	3	1	36963	41860	27730	35657	121	101	157	8	8	1	1	1	1	1	1	2	1	2000	0	0	0	0
10086022	24567350	34048359	103	1	0	0	1	0	1	37	108	22	96	71	10	9	1	2	1	1	1	0	0	0	1	3	1	184	184	184	184	178	15	231	8	2	0	1	0	0	1	1	2	1	400	0	0	1	0
11209060	28844926	34050524	59	1	0	0	0	0	1	36	99	14	100	73	13	8	1	4	1	1	0	0		0	0	7	1	77	77	77	77	161	148	209	28	16	0	0	0	0	1	1	1	0	200	0	1	0	0
13060659	27864165	34053363	61	1	0	0	0	0	1	39	106	22	86	58	32	10	2	2	1	1	1	1	0	0	0	10	1	1371	1371	1371	1371	87	47	113	16	13	0	0	0	0	1	1	2	1	1200	0	0	0	0
18231523	24611036	34053665	52	0	0	0	0	0	0	38	88	24	99	61	12	12	1	2	0	1	0	0		0	0	3	1	749	749	749	749	102	11	133	8	6	0	0	0	0	0	0	2	1	600	0	0	0	1
14301996	25583920	34065702	82	0	1	0	1	0	0	37	78	23	97	68	7	13	1	1	1	1	0	0		0	0	4	1	281	281	281	281	204	31	265	4	2	0	0	0	0	0	0	2	1	400	0	0	1	0
12051328	20313145	34070680	83	1	0	0	1	0	0	37	106	31	95	59	13	11	2	2	1	1	0	0		0	0	5	1	221	221	221	221	116	30	151	8	3	0	1	0	0	0	1	2	1	400	0	0	1	0
13312464	21182114	34074944	87	0	1	0	0	0	1	37	114	31	92	69	5	11	1	1	1	1	0	0		0	0	2	1	218	218	218	218	186	25	242	10	1	0	0	0	0	0	1	2	1	400	0	0	1	0
13098061	25183929	34077257	54	0	0	1	0	0	1	37	73	11	98	70	14	11	1	2	0	0	0	0		0	0	3	1	932	932	932	932	118	53	153	4	2	0	0	0	0	0	1	2	1	800	0	0	0	0
11942901	24615963	34082277	82	0	1	0	1	1	1	37	138	15	99	76	14	12	2	2	0	1	0	0		0	0	10	1	409	409	409	409	202	40	263	22	7	1	1	0	0	1	1	2	1	400	0	0	1	0
18146957	28070198	34090678	67	1	1	1	1	0	1	37	103	16	99	57	9	10	2	2	0	1	0	0		0	0	5	1	242	242	242	242	138	29	179	23	3	0	0	0	0	1	1	1	0	200	0	1	0	0
14192748	27401497	34110555	70	1	0	1	0	0	1	37	78	32	90	56	8	8	1	2	1	1	0	0		0	0	2	1	13069	13069	13069	13069	139	37	181	19	1	0	0	0	0	0	1	2	1	2000	0	0	0	0
12006413	28984430	34114772	35	0	0	0	0	0	0	36	116	37	96	121	8	7	3	1	0	1	0	0		0	0	2	1	931	931	931	931	88	11	114	15	3	0	0	0	0	0	1	2	1	800	0	0	0	0
16166688	25169184	34117751	72	0	0	0	0	0	1	38	76	20	96	75	7	8	1	2	0	1	1	0	1	0	0	4	1	215	215	215	215	135	5	176	10	5	0	0	0	0	1	0	1	0	200	0	1	0	0
10620406	23825454	34124022	74	1	0	0	1	0	0	36	69	16	99	87	21	11	1	2	1	1	1	0	0	0	1	4	1	423	423	423	423	100	75	130	17	6	1	1	0	0	1	1	2	1	400	0	0	1	0
16424633	26508758	34124448	67	0	1	0	0	0	0	37	104	27	96	64	12	9	2	2	0	1	0	0		0	0	3	1	573	573	573	573	107	22	139	18	1	0	0	0	0	0	1	2	1	400	0	0	1	0
16135259	28318051	34124491	56	0	1	0	0	0	1	36	84	14	97	71	40	13	2	2	0	1	0	0		0	0	6	1	1024	1024	1024	1024	174	234	226	12	7	1	1	1	0	1	1	2	1	1000	0	0	0	0
13291750	27864654	34132991	58	0	0	0	1	1	0	37	100	15	95	66	16	13	1	1	0	1	0	0		0	0	2	1	171	171	171	171	159	48	208	2	2	0	0	0	0	0	0	1	0	200	0	1	0	0
15773840	28363075	34139557	25	0	0	0	0	0	0	37	49	18	100	66	14	14	1	3	0	1	1	1	0	0	0	3	1	210	210	210	210	178	20	231	30	30	0	0	0	0	1	1	1	0	200	0	1	0	0
11714717	25254657	34139610	53	0	0	0	0	0	1	38	104	25	95	64	17	10	2	2	0	1	1	1	0	0	0	9	1	4193	4193	3344	3834	109	43	142	5	5	1	1	1	1	1	1	2	1	2000	0	0	0	0
19146753	22993450	34142754	46	1	0	0	0	0	1	37	85	21	100	78	13	10	1	1	1	1	0	0		0	0	3	1	1495	1495	1495	1495	85	24	111	16	8	0	0	0	0	1	1	2	1	1400	0	0	0	0
18628296	28663947	34144618	32	0	0	0	0	0	1	37	128	23	99	54	11	7	1	3	1	1	0	0		0	0	3	1	199	199	199	199	104	127	135	7	4	0	0	0	0	0	1	2	1	400	0	0	1	0
17540015	26449130	34148423	66	0	1	1	1	1	1	36	117	26	100	78	14	10	5	1	0	1	1	1	0	0	0	8	1	342	342	342	342	179	132	233	29	29	0	0	0	0	1	1	1	0	200	0	1	0	0
17478232	28536301	34151155	66	1	0	0	1	0	1	38	89	37	94	70	15	12	1	1	0	1	1	1	0	0	0	2	1	892	892	892	892	167	14	217	44	42	0	1	1	1	0	1	2	1	800	0	0	0	0
13396545	29038279	34156240	59	0	0	0	0	1	1	37	85	10	98	86	6	7	1	3	1	1	1	0	1	0	0	2	1	354	375	354	365	161	171	199	9	1	0	1	0	0	0	0	2	1	400	0	0	1	0
19326654	25280516	34168695	71	0	1	0	0	0	0	37	102	16	96	73	6	11	2	1	1	1	1	1	0	0	0	6	1	34	34	34	34	329	16	428	14	14	1	1	1	1	1	1	1	0	200	0	1	0	0
10047682	21592506	34169596	34	0	0	0	0	0	1	39	140	26	95	72	18	7	2	1	0	1	1	0	1	1	0	4	1	1111	1111	1111	1111	179	48	233	53	14	0	0	0	0	1	1	2	1	1000	0	0	0	0
10826816	20350261	34177992	82	1	0	1	0	0	0	36	89	14	99	84	14	14	1	4	0	1	0	0		0	0	5	1	190	190	190	190	184	47	239	7	4	1	1	1	0	0	1	1	0	200	0	1	0	0
19248146	20575710	34181644	72	0	0	0	0	0	1	35	70	13	97	72	5	11	1	2	1	1	0	0		0	0	2	1	1003	1003	1003	1003	73	28	95	8	3	0	0	0	0	0	0	2	1	1000	0	0	0	0
13296814	27252243	34188978	69	1	1	1	1	0	1	37	91	28	100	72	6	9	1	1	0	1	0	0		0	0	2	1	126	126	126	126	178	12	231	6	3	0	0	0	0	0	0	1	0	200	0	1	0	0
15721956	26670774	34192401	47	1	0	1	1	0	1	37	83	21	95	76	15	8	1	1	0	0	0	0		0	0	4	1	2768	2768	2768	2768	77	21	100	11	6	0	0	0	0	0	1	2	1	2000	0	0	0	0
16743731	24059086	34206236	29	0	0	0	0	0	1	36	117	28	100	67	13	12	1	4	0	1	0	0		0	0	2	1	36963	41860	33281	35657	128	207	166	7	5	0	1	0	0	1	1	2	1	2000	0	0	0	0
15146844	23277572	34207064	77	1	0	1	1	0	0	37	106	17	97	72	11	11	1	2	0	1	1	0	0	1	0	2	1	162	162	162	162	192	16	250	5	2	0	0	0	0	0	1	1	0	200	0	1	0	0
16722759	26327329	34218332	70	0	0	1	0	0	1	36	140	33	93	106	40	15	1	3	0	1	0	0		0	0	3	1	2624	2624	2624	2624	143	42	181	9	3	0	0	0	0	1	0	2	1	2000	0	0	0	0
18159262	28167106	34222208	46	0	0	0	0	0	1	37	102	19	97	79	6	11	1	3	0	1	1	0	0	1	0	5	1	175	175	175	175	165	135	215	5	4	0	0	0	0	1	0	1	0	200	0	1	0	0
11511458	20941398	34227617	88	1	1	0	1	0	0	37	69	15	98	82	17	13	1	1	0	1	0	0		0	0	3	1	111	111	111	111	168	21	218	9	2	1	1	1	0	0	0	1	0	200	0	1	0	0
14634884	21154658	34230447	91	1	1	1	0	0	0	36	61	23	100	66	34	9	3	3	1	1	0	0		0	0	9	1	167	167	167	167	264	14	343	2	1	1	1	1	0	0	1	2	1	400	0	0	1	0
16764929	24781495	34234646	73	1	0	0	1	0	1	36	88	15	94	74	6	9	1	2	0	1	0	0		0	0	4	1	1613	1613	1613	1613	149	180	194	7	1	0	1	0	0	0	0	2	1	1600	0	0	0	0
16501746	22797806	34238844	53	0	1	0	0	1	1	36	97	19	100	70	11	8	1	2	1	1	1	0	0	1	1	12	1	480	480	480	480	117	146	152	53	16	0	1	0	0	1	1	2	1	400	0	0	1	0
11061931	21093327	34247071	76	0	1	0	0	1	1	37	109	23	99	91	6	7	4	2	1	1	0	0		0	0	5	1	522	522	522	522	174	37	226	9	1	0	0	0	0	0	1	2	1	400	0	0	1	0
14080908	21718748	34247376	22	0	0	0	0	0	0	37	82	16	100	96	13	14	1	1	0	1	0	0		0	0	2	1	61	67	61	64	275	49	358	2	2	1	1	1	1	0	1	1	0	200	0	1	0	0
17907596	21801758	34260029	67	1	0	0	0	0	1	38	105	24	99	89	6	9	1	2	0	1	1	1	0	0	0	9	1	1687	1687	663	1175	140	12	182	29	19	0	0	0	0	0	1	2	1	1600	0	0	0	0
16467047	25070073	34260730	75	1	1	0	0	0	1	36	99	32	96	53	17	9	7	2	1	1	1	1	1	0	0	5	1	222	222	206	214	130	27	173	47	47	0	1	1	1	1	1	2	1	400	0	0	1	0
15666511	25768999	34263977	25	0	0	0	0	0	1	37	113	27	94	76	36	8	2	2	1	1	1	0	0	1	0	5	1	398	398	398	398	138	13	179	29	2	0	0	0	0	1	1	2	1	400	0	0	1	0
18742792	24582337	34271638	69	0	0	0	0	1	1	39	83	28	96	82	11	9	2	1	0	0	1	1	0	0	0	8	1	3357	3357	3357	3357	113	89	147	42	35	0	0	0	0	0	1	2	1	2000	0	0	0	0
11880433	28764595	34276548	52	0	1	0	1	0	0	38	68	21	99	99	15	9	1	3	0	0	1	0	0	0	0	8	1	428	428	428	428	122	20	159	30	20	0	0	0	0	1	1	2	1	400	0	0	1	0
11152474	23101582	34286801	84	1	0	1	0	0	1	38	74	20	98	88	11	10	2	2	1	1	0	0		0	0	11	1	299	299	299	299	190	42	247	23	23	0	1	0	0	0	1	2	1	400	0	0	1	0
13658672	28535091	34287204	25	0	0	0	0	0	1	37	56	22	100	83	6	12	1	1	0	1	0	0		0	0	2	1	360	360	360	360	136	72	177	27	2	0	0	0	0	0	0	1	0	200	0	1	0	0
14151129	28732328	34288205	69	0	0	0	1	0	0	37	79	14	100	78	19	15	1	2	0	1	1	1	0	0	0	2	1	392	392	392	392	157	35	204	10	8	0	0	0	0	0	1	1	0	200	0	1	0	0
13174810	24580237	34291164	28	0	0	0	0	0	1	36	127	16	100	97	9	9	2	4	0	1	0	0		0	0	5	1	610	610	610	610	210	29	273	24	22	0	0	0	0	1	1	2	1	600	0	0	0	1
12079355	28581942	34292315	56	0	0	0	0	0	1	37	73	16	99	67	14	7	1	2	0	0	0	0		0	0	2	1	18	18	18	18	215	20	280	56	34	0	0	0	0	1	1	0	0	0	1	0	0	0
15872027	22419576	34294044	43	0	1	0	0	0	1	37	124	24	94	78	14	10	3	4	1	1	1	1	0	0	0	10	1	17467	17467	956	6511	133	20	173	18	19	1	1	1	1	1	1	2	1	2000	0	0	0	0
15211962	29881783	34304824	39	0	0	0	0	0	1	37	53	22	98	60	7	10	1	2	1	1	1	0	1	1	0	6	1	1138	1138	1138	1138	68	90	88	35	1	0	0	0	0	0	0	2	1	1000	0	0	0	0
14366256	20653015	34312224	79	0	1	1	1	1	1	37	85	22	100	78	9	13	3	1	0	1	1	0	0	0	0	5	1	227	227	227	227	177	46	230	12	7	0	0	0	0	1	1	1	0	200	0	1	0	0
10562205	20149612	34317198	18	0	0	0	0	0	1	38	117	36	99	55	12	10	1	1	0	1	0	0		0	0	3	1	566	566	566	566	154	78	200	12	10	0	0	0	0	0	1	2	1	400	0	0	1	0
14155916	20422432	34317467	61	1	1	1	1	0	1	37	91	14	99	91	22	9	1	2	0	1	0	0		0	0	2	1	494	494	494	494	147	29	191	26	8	0	0	0	0	0	1	2	1	400	0	0	1	0
14836889	28634721	34319023	87	1	1	0	0	0	1	36	116	20	97	69	8	11	1	2	1	1	1	0	1	0	0	2	1	520	520	520	520	205	28	267	15	4	0	0	0	0	0	1	2	1	400	0	0	1	0
18455402	26039491	34320919	78	0	0	0	1	0	0	38	86	12	100	57	5	10	1	1	0	0	1	0	0	1	0	2	1	328	328	328	328	150	22	133	35	35	0	0	0	0	0	1	1	0	200	0	1	0	0
18197017	22017947	34328580	39	0	0	1	0	0	1	38	81	17	96	75	12	10	1	2	0	1	0	0		0	0	7	1	193	193	193	193	128	12	166	7	2	0	0	0	0	1	0	1	0	200	0	1	0	0
13719014	29437498	34332444	80	1	0	1	1	0	0	37	136	26	98	96	16	10	1	1	0	1	1	0	0	1	0	3	1	2904	2904	2904	2904	154	193	200	27	24	1	1	1	1	0	1	2	1	2000	0	0	0	0
12327858	24722783	34332620	75	0	1	1	0	1	1	37	69	28	97	78	18	10	3	4	1	1	1	1	1	0	0	7	1	366	366	366	366	173	41	225	17	16	1	1	1	0	1	1	2	1	400	0	0	1	0
19241223	22886040	34332623	83	0	1	0	0	0	1	36	71	22	100	53	12	9	1	2	1	0	0	0		0	0	3	1	765	815	765	790	186	24	244	14	9	0	0	0	0	0	1	2	1	600	0	0	0	1
16717030	24926064	34332658	80	1	0	1	0	0	1	37	86	25	97	91	6	12	1	1	0	1	0	0		0	0	2	1	92	92	92	92	245	32	319	20	20	0	0	0	0	0	1	1	0	200	0	1	0	0
13548972	25878464	34333223	34	0	0	0	0	0	1	36	82	24	94	86	3	10	1	2	1	1	0	0		0	0	2	1	144	144	144	144	177	119	230	2	2	0	0	0	0	0	0	1	0	200	0	1	0	0
17545223	23546622	34336536	65	1	0	0	0	0	0	36	112	21	94	109	3	7	1	1	1	1	0	0		0	0	3	1	457	503	457	480	156	39	204	6	4	0	0	0	0	0	1	2	1	400	0	0	1	0
18770565	24261893	34338763	69	0	0	0	0	1	1	36	113	23	93	91	11	13	5	2	0	1	0	0		0	0	5	1	1755	1755	1755	1755	88	21	114	1	1	1	1	1	1	0	1	2	1	1600	0	0	0	0
19253914	22694029	34339915	91	0	1	1	0	1	0	36	107	21	100	75	9	9	1	1	0	1	0	0		0	0	2	1	1734	1734	1734	1734	105	14	137	6	1	0	1	0	0	0	0	2	1	1600	0	0	0	0
13183268	22344073	34341359	86	1	1	1	1	0	1	37	88	9	100	75	17	11	1	3	1	0	0	0		0	0	2	1	232	232	232	232	184	21	234	10	6	0	0	0	0	1	1	2	1	400	0	0	1	0
16348359	26032183	34343050	36	0	0	1	0	1	1	37	100	24	99	79	16	7	2	1	1	1	0	0		0	0	2	1	480	480	480	480	116	24	164	24	7	0	0	0	0	0	0	2	1	400	0	0	1	0
15321935	24852928	34345726	22	0	0	0	0	0	0	37	93	25	96	65	12	12	1	2	0	1	0	0		0	0	2	1	791	791	791	791	137	12	178	12	6	0	0	0	0	1	1	2	1	600	0	0	0	1
13824034	22682934	34350507	71	1	1	1	0	0	0	37	59	20	95	63	8	12	1	2	1	1	0	0		0	0	3	1	48	48	48	48	255	28	332	4	2	0	0	0	0	1	1	1	0	200	0	1	0	0
17039298	21585011	34357286	55	0	0	0	0	0	1	37	102	24	96	60	23	10	1	1	1	1	0	0		0	0	3	1	109	109	109	109	154	185	200	7	5	0	0	0	0	0	1	1	0	200	0	1	0	0
14670622	24495067	34363258	54	0	0	0	0	0	0	37	110	21	98	55	13	9	1	3	1	1	0	0		0	0	9	1	634	634	634	634	86	10	112	12	13	1	1	1	1	1	1	2	1	600	0	0	0	1
13251286	20115323	34364406	67	0	0	0	0	0	1	37	114	24	92	81	8	8	1	2	0	1	0	0		0	0	3	1	4391	4391	4391	4391	163	76	212	27	25	1	1	1	0	0	1	2	1	2000	0	0	0	0
10047172	21396386	34369439	74	1	0	1	0	0	1	36	87	23	95	83	14	8	1	3	0	0	0	0		0	0	4	1	2441	2441	2441	2441	82	17	107	13	2	1	1	1	0	0	0	2	1	2000	0	0	0	0
14316710	27896316	34370364	47	0	0	0	0	0	1	37	101	25	98	80	9	8	2	2	1	1	1	0	1	0	0	7	1	1462	1462	1462	1462	121	150	157	26	12	1	1	1	0	0	1	2	1	1400	0	0	0	0
19654837	22672422	34372594	69	0	0	0	0	0	1	36	80	29	94	87	20	11	1	1	0	1	0	0		0	0	2	1	36963	41860	33281	35657	143	55	187	8	7	1	1	1	1	0	1	2	1	2000	0	0	0	0
13518094	23098550	34393060	76	0	0	0	1	0	1	37	67	15	95	71	7	10	1	1	0	1	0	0		0	0	3	1	317	317	317	317	127	22	165	13	6	0	0	0	0	1	1	1	0	200	0	1	0	0
14163173	24635555	34393738	60	0	0	1	0	0	1	37	106	16	97	74	5	10	1	1	0	1	0	0		0	0	4	1	4596	4596	4596	4596	105	53	137	11	1	0	0	0	0	0	1	2	1	2000	0	0	0	0
13318093	24292584	34404392	70	1	1	0	0	0	1	37	92	15	97	67	21	6	1	4	1	1	1	0	1	0	0	4	1	104	104	104	104	174	31	226	18	3	0	0	0	0	0	1	1	0	200	0	1	0	0
13330210	25157266	34410494	59	0	0	0	0	0	1	37	83	21	91	69	12	11	1	1	1	1	0	0		0	0	2	1	348	348	348	348	170	22	221	6	2	0	0	0	0	0	1	2	1	400	0	0	1	0
16002017	20117049	34411018	71	0	0	0	0	1	1	36	69	16	99	90	18	8	4	4	0	1	0	0		0	0	3	1	25567	25567	25567	25567	116	169	151	9	4	0	0	0	0	1	1	2	1	2000	0	0	0	0
19546481	27291252	34412251	72	1	0	0	1	0	0	37	100	26	90	75	11	10	1	3	1	1	0	0		0	0	11	1	2332	2332	2332	2332	127	44	165	0	0	1	1	1	1	1	0	2	1	2000	0	0	0	0
11852952	23839981	34413481	78	0	0	0	0	0	0	37	135	17	98	121	3	9	3	2	0	1	0	0		0	0	8	1	9187	9187	9187	9187	56	26	73	2	2	1	1	1	1	0	1	2	1	2000	0	0	0	0
13662510	21958955	34415146	67	0	0	0	0	0	1	38	73	18	96	108	7	9	1	1	1	1	1	1	0	0	0	3	1	86	86	86	86	131	24	170	25	14	0	0	0	0	0	0	1	0	200	0	1	0	0
18102389	25754706	34430921	64	1	1	0	0	0	1	37	92	18	100	75	20	9	1	4	0	0	1	1	0	0	0	7	1	6054	6054	6054	6054	93	110	121	11	11	1	1	1	1	1	1	2	1	2000	0	0	0	0
13425424	29210183	34431190	64	0	1	1	0	0	0	36	118	13	98	94	7	11	2	2	0	1	0	0		0	0	3	1	1724	1724	1724	1724	146	70	190	21	1	0	0	0	0	0	1	2	1	1600	0	0	0	0
16036089	20187371	34435441	71	0	1	0	1	1	1	37	58	14	100	74	7	9	2	1	0	1	0	0		0	0	2	1	65	65	65	65	238	279	309	9	3	0	0	0	0	0	1	1	0	200	0	1	0	0
10373824	27677881	34440488	84	1	0	1	1	0	0	37	64	22	98	72	14	10	3	2	1	1	1	1	0	0	0	8	1	1589	1589	1589	1589	99	42	129	26	19	0	0	0	0	0	1	2	1	1400	0	0	0	0
16252323	23075715	34445353	80	0	0	0	0	0	1	37	117	13	98	75	15	9	2	1	0	1	0	0		0	0	4	1	1033	1033	1033	1033	131	150	170	11	4	1	1	0	0	0	0	2	1	1000	0	0	0	0
18442816	26324039	34447663	91	0	1	1	1	1	1	37	49	13	99	51	17	11	2	2	1	1	0	0		0	0	2	1	35	35	35	35	309	19	402	10	1	0	0	0	0	0	1	1	0	200	0	1	0	0
11790974	27152376	34450827	62	0	1	0	1	1	1	36	61	20	91	73	16	10	3	3	0	1	0	0		0	0	4	1	871	871	871	871	65	96	85	2	2	1	1	1	1	1	1	2	1	800	0	0	0	0
10978131	25074431	34453158	77	0	0	0	0	0	0	37	93	21	96	62	6	13	1	1	1	1	0	0		0	0	5	1	11647	11647	3138	8222	126	87	164	11	7	0	0	0	0	0	1	2	1	2000	0	0	0	0
14152246	29935333	34456147	66	0	1	0	1	1	0	36	59	15	100	54	13	9	7	1	0	1	0	0		0	0	5	1	477	477	477	477	116	15	151	14	2	0	0	0	0	1	1	2	1	400	0	0	1	0
11242316	22076159	34459548	59	0	1	0	0	0	0	37	129	15	95	96	24	15	3	2	0	0	0	0		0	0	4	1	2814	2814	2814	2814	178	25	231	23	7	0	0	0	0	1	1	2	1	2000	0	0	0	0
17465152	24080920	34460551	71	0	0	0	0	0	1	38	134	28	100	56	25	6	2	2	1	1	0	0		0	0	2	1	1696	1696	1696	1696	88	8	114	7	3	0	0	0	0	1	1	2	1	1600	0	0	0	0
16027970	20830648	34468245	65	0	0	0	0	0	1	35	66	17	100	44	1	10	7	4	0	1	0	0		0	0	10	1	1949	1949	1949	1949	70	91	91	30	30	0	1	0	0	0	1	2	1	1800	0	0	0	0
14616329	24798434	34473327	87	0	1	0	0	0	1	36	81	32	94	76	6	10	1	2	0	1	0	0		0	0	4	1	118	118	118	118	220	26	286	5	3	0	0	0	0	0	1	1	0	200	0	1	0	0
19017206	27845584	34478728	55	0	0	0	0	1	0	36	113	17	91	64	12	7	2	1	1	1	1	0	1	0	0	4	1	59	59	59	59	242	26	315	27	27	1	1	1	1	0	1	1	0	200	0	1	0	0
17167982	22497715	34479166	52	0	0	0	0	0	0	36	85	23	88	57	19	10	1	2	0	1	1	0	1	0	0	2	1	479	564	385	499	85	19	117	62	61	0	1	1	1	1	1	2	1	400	0	0	1	0
11151862	20072191	34482643	52	0	1	1	0	0	1	37	117	20	100	82	9	10	1	2	1	1	0	0		0	0	4	1	36	36	36	36	363	67	472	5	3	0	0	0	0	0	1	1	0	200	0	1	0	0
13709774	29177584	34489989	50	1	0	0	0	0	1	38	83	13	93	106	6	8	2	1	0	1	0	0		0	0	2	1	416	416	416	416	152	25	198	36	21	0	0	0	0	0	1	2	1	400	0	0	1	0
10145417	27257164	34490961	25	0	0	0	0	0	1	37	74	16	100	66	8	10	1	1	1	1	0	0		0	0	3	1	18	18	18	18	257	83	334	3	3	0	0	0	0	0	1	1	0	200	0	1	0	0
12627553	26068036	34499406	61	0	0	0	0	1	0	37	78	20	88	58	14	8	2	1	0	1	1	1	1	0	0	8	1	675	675	675	675	97	37	126	50	32	0	0	0	0	0	1	2	1	600	0	0	0	1
17051024	27878518	34502571	88	1	1	0	0	0	0	36	108	37	92	105	18	10	1	2	1	1	1	0	1	0	0	3	1	210	210	210	210	162	40	214	21	4	1	1	1	0	0	1	2	1	400	0	0	1	0
11921391	21048337	34511936	85	0	1	1	1	1	1	36	66	14	95	57	11	11	1	1	1	1	1	0	1	0	1	5	1	342	342	342	342	127	33	165	11	7	0	0	0	0	0	1	2	1	400	0	0	1	0
15275707	22660479	34514700	47	0	0	1	0	0	0	39	129	24	94	66	12	9	1	1	0	1	0	0		0	0	2	1	340	340	340	340	109	11	142	10	2	0	0	0	0	0	0	1	0	200	0	1	0	0
13748756	25103103	34515444	73	0	1	1	1	1	0	37	88	16	100	64	15	10	2	2	0	1	1	1	0	0	0	2	1	54	54	54	54	147	40	188	9	9	1	1	1	1	1	1	1	0	200	0	1	0	0
16675393	28362283	34519096	89	0	1	0	0	1	0	36	86	17	96	89	5	8	2	1	0	1	0	0		0	0	2	1	252	252	252	252	187	65	243	2	1	0	0	0	0	0	0	1	0	200	0	1	0	0
14352969	22108269	34519899	72	0	0	0	1	1	0	38	92	14	100	84	13	8	3	2	1	1	1	0	0	0	0	3	1	13344	13344	13344	13344	144	50	189	13	2	0	0	0	0	0	1	2	1	2000	0	0	0	0
18966399	29338106	34520296	57	0	1	0	1	1	0	37	94	19	99	99	15	16	2	3	0	1	0	0		0	0	4	1	520	520	520	520	199	51	259	13	8	0	0	0	0	1	1	2	1	400	0	0	1	0
16965047	20584153	34523380	72	0	1	1	1	1	1	37	60	21	98	65	21	8	7	3	0	1	0	0		0	0	10	1	74	74	74	74	144	64	184	1	1	1	1	1	1	1	1	1	0	200	0	1	0	0
14480817	29331231	34533582	56	1	0	0	0	0	1	37	105	14	94	78	10	11	1	2	0	0	0	0		0	0	2	1	225	225	225	225	119	7	155	8	3	0	0	0	0	0	0	1	0	200	0	1	0	0
12306690	20473676	34539052	57	0	0	0	1	0	0	38	86	21	93	94	13	15	1	1	0	1	0	0		0	0	2	1	238	238	238	238	186	141	242	13	7	0	0	0	0	0	1	1	0	200	0	1	0	0
13269046	23253820	34552544	22	0	0	0	0	0	0	37	105	21	98	107	24	14	2	3	0	1	0	0		0	0	4	1	24124	24124	24124	24124	149	224	194	6	6	1	1	1	1	0	0	2	1	2000	0	0	0	0
18490450	25377677	34552794	41	1	0	0	0	0	0	39	99	25	100	80	11	11	1	1	0	1	1	0	0	0	1	2	1	463	463	463	463	186	55	242	15	13	0	0	0	0	0	1	2	1	400	0	0	1	0
11833476	27467826	34570388	45	0	0	1	0	0	1	38	89	19	99	81	11	9	1	1	0	1	0	0		0	0	5	1	587	587	587	587	78	10	101	19	12	0	0	0	0	0	1	2	1	400	0	0	1	0
11722038	25254852	34570510	52	0	0	0	0	0	1	39	124	21	96	68	31	8	0	2	1	1	1	0	0	0	1	3	1	789	789	789	789	88	11	114	31	1	0	0	0	0	0	0	2	1	600	0	0	0	1
14309442	21702831	34573037	78	0	0	0	0	0	0	36	78	18	98	69	7	9	1	1	1	1	1	0	1	0	0	2	1	96	96	96	96	220	76	286	22	6	0	0	0	0	0	1	1	0	200	0	1	0	0
19650793	20792056	34592853	91	0	1	0	1	1	1	37	94	37	92	93	31	11	1	4	0	1	0	0		0	0	3	1	403	403	403	403	151	18	196	14	2	0	0	0	0	0	1	2	1	400	0	0	1	0
11904421	20981431	34604487	64	0	0	0	0	1	1	37	68	16	100	81	11	6	3	1	1	1	0	0		0	0	3	1	411	411	411	411	288	257	374	3	1	0	0	0	0	0	0	2	1	400	0	0	1	0
10912856	24089705	34606693	73	0	1	1	1	1	1	37	90	23	99	87	11	9	7	2	0	1	1	0	0	1	0	6	1	198	267	198	233	168	22	147	28	7	0	0	0	0	0	1	1	0	200	0	1	0	0
18301171	25547230	34606971	69	0	1	0	0	1	0	36	49	12	94	74	7	8	5	2	0	1	0	0		0	0	3	1	103	103	103	103	212	15	276	3	2	0	0	0	0	0	1	1	0	200	0	1	0	0
19113676	28013122	34607020	72	0	1	0	0	0	0	37	114	19	98	77	20	11	1	3	1	1	1	0	1	0	0	2	1	60	60	60	60	293	12	381	1	1	1	1	1	1	1	1	1	0	200	0	1	0	0
19414662	26138181	34609091	76	0	0	0	1	0	1	37	121	16	89	69	26	9	1	1	0	0	0	0		0	0	3	1	7865	7865	7865	7865	129	56	168	22	13	0	0	0	0	0	0	2	1	2000	0	0	0	0
14081383	27153604	34613466	64	1	0	1	0	0	1	36	78	8	100	84	13	11	1	2	0	1	0	0		0	0	2	1	57	57	57	57	166	52	210	5	4	0	0	0	0	0	1	1	0	200	0	1	0	0
18287524	26800740	34614752	92	1	0	0	0	0	1	37	90	22	99	63	15	7	0	1	0	1	1	1	0	0	0	6	1	301	301	301	301	122	15	159	12	12	0	1	0	0	1	1	1	0	200	0	1	0	0
19965802	21104872	34618456	68	0	0	1	0	1	1	37	118	21	88	80	14	9	3	1	1	1	0	0		0	0	2	1	1226	1226	1226	1226	154	21	200	24	13	0	0	0	0	0	1	2	1	1200	0	0	0	0
12622960	28393935	34618852	92	0	0	0	1	0	1	37	69	32	100	72	34	9	1	2	0	0	1	0	1	0	1	3	1	36963	41860	33281	35657	159	44	208	24	2	0	0	0	0	0	1	2	1	2000	0	0	0	0
12911674	25740758	34618948	41	0	0	0	0	0	1	37	69	13	96	63	16	10	4	2	1	1	0	0		0	0	11	1	412	412	412	412	92	107	120	18	13	1	1	0	0	0	1	2	1	400	0	0	1	0
11707694	26598235	34619075	83	0	0	0	0	0	1	36	108	12	100	74	3	10	2	3	0	1	1	1	0	0	1	5	1	1198	1198	1198	1198	162	113	211	32	25	0	1	0	0	1	1	2	1	1000	0	0	0	0
19306382	21818103	34620357	75	0	0	0	0	1	0	37	130	24	92	101	2	8	1	4	0	1	1	1	0	1	0	2	1	452	452	394	423	69	28	112	40	29	0	0	0	0	1	1	2	1	400	0	0	1	0
10032381	20176432	34622731	64	0	1	0	0	0	0	37	84	24	94	90	14	8	1	1	1	1	1	0	1	1	0	3	1	1616	1716	1616	1666	91	12	118	51	43	0	0	0	0	0	1	2	1	1600	0	0	0	0
14246614	29310392	34628336	55	0	1	1	0	1	1	37	87	24	94	121	6	9	6	1	1	1	0	0		0	0	2	1	320	320	320	320	130	68	169	20	20	0	0	0	0	1	1	2	1	400	0	0	1	0
13590974	29465095	34634701	49	1	0	1	0	0	1	37	70	34	93	68	18	9	4	3	1	1	1	0	1	0	0	5	1	140	140	140	140	266	51	346	23	3	0	0	0	0	0	1	1	0	200	0	1	0	0
12666098	23988422	34639623	77	0	0	0	0	1	0	36	84	17	98	59	8	6	8	2	1	1	0	0		0	0	6	1	1643	1643	1584	1614	154	18	200	16	3	0	0	0	0	0	1	2	1	1600	0	0	0	0
10545747	25020409	34649276	75	0	1	0	1	1	1	36	99	26	87	59	24	7	2	2	0	1	0	0		0	0	2	1	1025	1025	940	983	129	25	181	10	10	1	1	1	1	1	1	2	1	1000	0	0	0	0
19489981	29729105	34653193	60	1	1	1	0	0	1	37	86	26	93	85	14	8	2	1	0	1	0	0		0	0	2	1	253	253	253	253	188	22	244	10	4	0	0	0	0	0	0	1	0	200	0	1	0	0
19152320	29429285	34660771	79	0	0	0	0	0	0	37	79	13	100	51	19	14	1	2	0	1	0	0		0	0	5	1	136	136	136	136	128	17	166	9	8	1	1	1	1	1	1	1	0	200	0	1	0	0
15438151	24675798	34664245	58	1	0	1	0	0	1	36	75	19	98	67	16	13	1	1	0	1	1	1	0	0	1	3	1	344	344	344	344	178	24	231	23	23	0	0	0	0	1	1	1	0	200	0	1	0	0
19373075	24784816	34664708	42	0	0	0	0	0	1	37	77	15	99	84	39	9	4	2	1	1	0	0		0	0	9	1	148	148	148	148	197	14	256	8	1	0	0	0	0	1	0	1	0	200	0	1	0	0
11474492	23376182	34677485	52	0	0	1	0	0	1	37	90	18	97	69	24	12	1	2	0	1	0	0		0	0	2	1	1455	1455	1455	1455	146	18	190	8	1	0	0	0	0	0	0	2	1	1400	0	0	0	0
17822730	21648460	34679499	65	0	1	0	0	0	1	37	114	26	98	66	1	7	1	4	1	1	0	0		0	0	2	1	2360	2360	2360	2360	150	69	199	25	4	0	0	0	0	1	1	2	1	2000	0	0	0	0
13496639	26484716	34682387	55	0	1	1	0	1	1	36	71	22	99	73	14	11	1	2	0	1	0	0		0	0	7	1	1049	1049	1049	1049	88	20	114	78	11	0	0	0	0	1	1	2	1	1000	0	0	0	0
19107246	20454250	34683599	73	0	0	1	0	1	0	36	72	27	100	45	9	10	1	2	0	1	1	0	0	1	0	2	1	1180	1180	1180	1180	93	22	121	35	16	0	0	0	0	0	1	2	1	1000	0	0	0	0
15911023	24498497	34683600	80	0	1	0	0	0	0	38	90	21	96	73	12	14	2	3	0	0	0	0		0	0	4	1	896	896	896	896	112	82	146	8	5	0	0	0	0	1	1	2	1	800	0	0	0	0
16771607	26864847	34685431	35	0	0	0	0	0	1	37	113	26	96	75	15	12	2	4	1	1	0	0		0	0	2	1	1550	1550	1550	1550	153	59	199	17	13	0	0	0	0	1	1	2	1	1400	0	0	0	0
14929191	21545324	34686387	85	0	1	0	0	0	0	36	94	20	97	71	4	8	1	1	1	1	0	0		0	0	7	1	97	97	97	97	263	92	342	6	6	0	0	0	0	0	1	1	0	200	0	1	0	0
11441670	29142856	34689947	52	0	0	0	0	1	1	37	100	26	93	90	11	12	3	3	0	1	1	0	0	1	0	6	1	2281	2281	2281	2281	101	75	135	16	16	1	1	1	1	1	1	2	1	2000	0	0	0	0
15395480	21593958	34691342	66	1	1	0	0	0	0	37	96	19	98	104	10	10	1	1	1	0	0	0		0	0	2	1	79	79	79	79	108	53	140	22	12	0	0	0	0	0	1	1	0	200	0	1	0	0
18676539	27615732	34692667	53	0	1	0	0	0	0	37	87	14	100	86	9	10	1	1	1	1	0	0		0	0	3	1	437	437	437	437	175	140	228	10	5	0	0	0	0	0	1	2	1	400	0	0	1	0
11874193	21363564	34696661	48	1	0	0	0	0	0	37	67	20	99	61	8	16	1	2	0	1	0	0		0	0	5	1	26700	26700	4642	13021	196	249	255	8	4	1	1	0	0	0	1	2	1	2000	0	0	0	0
13317579	28944188	34696918	27	0	0	0	0	0	0	37	98	22	99	82	13	10	1	1	1	1	0	0		0	0	5	1	396	396	396	396	221	56	287	1	1	0	0	0	0	0	0	2	1	400	0	0	1	0
10230936	20449497	34698361	92	0	1	0	0	1	1	36	72	17	93	76	6	10	2	2	0	1	0	0		0	0	4	1	2275	2275	2275	2275	156	118	203	8	2	1	1	0	0	0	1	2	1	2000	0	0	0	0
15152711	24842604	34698716	56	0	1	1	0	0	1	37	72	14	95	86	20	8	3	4	1	1	0	0		0	0	3	1	41	41	41	41	318	15	413	50	4	0	1	0	0	0	1	1	0	200	0	1	0	0
15940639	21266614	34702226	50	0	1	0	0	0	0	37	95	14	86	47	32	15	2	2	0	1	0	0		0	0	9	1	203	203	203	203	232	26	302	38	23	0	0	0	0	1	1	1	0	200	0	1	0	0
13063859	23419521	34708600	42	0	1	0	1	1	1	38	110	37	99	90	5	9	8	1	0	1	0	0		0	0	6	1	1559	1559	1559	1559	124	20	161	10	9	0	0	0	0	1	1	2	1	1400	0	0	0	0
17355507	21442547	34714160	62	1	0	0	0	0	0	37	98	26	96	84	26	11	1	2	0	1	0	0		0	0	3	1	561	561	561	561	132	26	172	5	1	0	0	0	0	0	0	2	1	400	0	0	1	0
17262897	21182224	34716000	66	0	0	0	0	0	0	37	123	21	100	71	3	7	1	2	0	1	0	0		0	0	6	1	532	532	532	532	99	127	129	22	3	0	1	0	0	0	0	2	1	400	0	0	1	0
14842397	26785758	34722571	74	1	1	0	1	0	1	37	99	23	99	60	11	8	1	1	1	1	0	0		0	0	2	1	281	281	281	281	157	12	204	16	5	0	0	0	0	0	1	2	1	400	0	0	1	0
13941822	21332990	34722616	65	0	1	1	0	0	1	37	79	30	100	56	7	8	2	4	1	1	0	0		0	0	9	1	1220	1220	1220	1220	172	81	221	10	7	1	1	0	0	0	1	2	1	1200	0	0	0	0
11491583	28868643	34725102	69	0	1	1	0	0	0	37	56	19	99	66	12	7	2	1	1	1	1	0	0	0	1	8	1	276	276	276	276	144	43	187	9	9	1	1	1	1	1	1	2	1	400	0	0	1	0
16343783	22600297	34731397	68	1	0	0	1	0	0	38	79	26	97	85	30	10	2	1	0	1	0	0		0	0	9	1	1605	1605	1605	1605	128	35	166	7	7	1	1	1	1	1	1	2	1	1600	0	0	0	0
12176861	24306529	34739514	82	0	1	0	1	1	1	36	73	20	93	63	16	8	3	2	0	1	0	0		0	0	2	1	287	287	287	287	154	107	200	11	5	1	1	0	0	0	1	1	0	200	0	1	0	0
11077323	22347918	34747597	57	1	0	0	0	0	0	37	111	19	96	44	6	11	1	2	1	0	0	0		0	0	5	1	1250	1250	1250	1250	107	31	139	52	27	0	0	0	0	1	1	2	1	1200	0	0	0	0
19753029	22888975	34747681	91	1	1	0	1	0	1	37	109	16	99	103	12	8	1	1	0	1	0	0		0	0	3	1	399	399	399	399	180	77	234	8	3	0	0	0	0	0	1	1	0	200	0	1	0	0
19434443	25852702	34749660	24	0	0	0	0	0	0	36	127	26	99	91	10	12	1	1	0	1	0	0		0	0	5	1	306	306	306	306	152	8	198	14	12	0	0	0	0	0	1	1	0	200	0	1	0	0
12653764	24164680	34769078	39	0	0	0	0	0	0	37	83	23	97	81	15	9	1	4	1	1	1	0	1	0	0	6	1	296	296	296	296	180	50	234	19	5	0	0	0	0	0	1	2	1	400	0	0	1	0
19654305	23517830	34776632	61	0	0	0	0	0	1	36	84	20	100	73	13	9	0	2	0	1	0	0		0	0	8	1	2010	2010	2010	2010	72	102	94	67	13	1	1	1	1	0	1	2	1	2000	0	0	0	0
16441592	26033789	34777670	91	0	1	0	1	1	0	37	102	29	96	66	9	11	1	1	1	0	1	0	1	0	0	2	1	170	170	170	170	186	28	242	12	11	1	1	0	0	0	1	2	1	400	0	0	1	0
13886051	20159294	34785841	66	1	0	0	0	0	1	37	59	23	100	60	19	7	2	1	1	1	0	0		0	0	5	1	772	772	772	772	35	38	46	8	8	1	1	1	1	1	1	2	1	600	0	0	0	1
15239071	22209569	34786353	58	0	1	1	0	1	1	37	104	27	98	64	14	7	3	1	0	1	1	1	0	0	0	9	1	993	993	993	993	106	50	138	43	39	0	1	1	1	0	1	2	1	800	0	0	0	0
15257559	20095131	34787482	63	0	0	0	0	0	1	37	91	23	98	76	16	8	0	3	1	0	0	0		0	0	2	1	2148	2148	2148	2148	48	62	62	15	7	1	1	1	0	0	1	2	1	2000	0	0	0	0
16405783	24518970	34798444	35	0	0	0	0	0	0	38	100	37	96	82	10	8	1	1	0	1	0	0		0	0	5	1	492	492	492	492	178	37	231	8	5	0	0	0	0	0	1	2	1	400	0	0	1	0
16882027	22717994	34803966	79	1	0	0	0	0	1	37	106	31	91	64	9	7	1	2	0	1	0	0		0	0	2	1	251	251	251	251	96	27	125	44	15	0	0	0	0	0	1	1	0	200	0	1	0	0
11634175	29207403	34805873	72	1	0	1	0	0	1	37	74	20	97	81	18	9	3	4	1	1	0	0		0	0	9	1	23078	23078	23078	23078	88	130	114	3	3	1	1	1	1	1	1	2	1	2000	0	0	0	0
13397413	24489365	34824971	45	0	0	0	0	0	0	36	128	21	95	50	12	10	3	3	0	1	1	0	0	1	0	6	1	1199	1199	1199	1199	208	50	270	19	11	1	1	1	0	0	1	2	1	1000	0	0	0	0
14866477	20957031	34835430	85	1	1	0	0	0	1	37	59	12	97	62	15	11	2	1	0	1	0	0		0	0	5	1	841	841	841	841	132	17	172	10	7	0	0	0	0	0	1	2	1	800	0	0	0	0
16938879	27499141	34840465	85	0	1	1	1	1	1	37	60	18	100	72	7	7	5	1	1	1	1	0	1	0	0	5	1	2464	2464	2464	2464	139	27	181	22	6	0	0	0	0	0	1	2	1	2000	0	0	0	0
18035291	28610916	34844618	68	1	0	0	0	0	1	37	136	20	99	77	18	13	1	4	1	1	0	0		0	0	8	1	124	124	124	124	175	22	228	6	4	0	0	0	0	1	1	1	0	200	0	1	0	0
19448629	29219112	34852120	38	1	0	0	0	0	1	38	131	8	96	61	8	8	1	4	0	1	0	0		0	0	4	1	210	210	210	210	130	48	169	11	6	0	0	0	0	1	1	1	0	200	0	1	0	0
17527209	26363804	34860032	58	0	0	0	0	0	1	37	85	19	95	77	8	10	1	1	0	1	0	0		0	0	2	1	103	103	103	103	206	20	268	3	3	0	0	0	0	0	0	1	0	200	0	1	0	0
12883513	25341698	34860154	78	0	0	0	0	1	1	37	93	27	95	56	16	7	4	1	1	1	0	0		0	0	6	1	209	209	209	209	119	14	155	8	2	0	0	0	0	1	0	2	1	400	0	0	1	0
10896786	21857366	34862475	67	0	0	1	0	0	1	37	77	15	99	115	5	11	3	1	0	1	0	0		0	0	3	1	265	265	265	265	170	33	221	7	4	0	0	0	0	1	0	1	0	200	0	1	0	0
14757759	29083878	34865302	68	0	0	1	1	1	1	37	71	16	95	103	20	10	4	2	1	1	0	0		0	0	3	1	867	867	867	867	76	24	99	12	12	0	0	0	0	1	1	2	1	800	0	0	0	0
16260101	23831086	34867560	78	1	0	0	0	0	0	37	102	12	100	70	14	11	1	2	1	1	1	0	1	0	0	2	1	418	418	418	418	93	18	121	30	8	0	0	0	0	0	1	2	1	400	0	0	1	0
15284146	25198442	34874089	50	0	0	0	0	0	0	37	83	21	98	99	13	11	1	1	0	1	0	0		0	0	3	1	723	723	723	723	185	93	241	4	2	0	0	0	0	0	0	2	1	600	0	0	0	1
14767018	21575486	34890081	53	0	0	1	0	0	1	39	97	37	98	61	11	7	6	2	1	0	0	0		0	0	11	1	1862	1870	1862	1866	178	73	231	32	19	0	0	0	0	0	1	2	1	1800	0	0	0	0
10064854	20184139	34896096	84	0	0	0	0	0	1	37	124	28	93	105	40	16	1	4	0	1	1	1	0	0	0	3	1	395	395	395	395	197	137	256	37	15	0	0	0	0	0	1	1	0	200	0	1	0	0
15860846	21063184	34897027	22	0	0	0	0	0	0	36	83	14	100	67	9	12	1	2	1	1	0	0		0	0	2	1	156	156	156	156	195	28	254	5	2	0	0	0	0	0	0	2	1	400	0	0	1	0
14776391	23639193	34897754	82	0	1	1	1	1	1	37	114	24	97	62	31	8	3	2	0	1	0	0		0	0	2	1	744	744	744	744	131	16	170	8	3	1	1	0	0	1	1	2	1	600	0	0	0	1
18756147	21170807	34900611	41	0	1	0	0	0	0	38	102	25	96	60	13	6	3	1	0	1	1	1	0	1	0	6	1	1596	1596	1596	1596	112	54	146	36	15	0	0	0	0	0	1	2	1	1400	0	0	0	0
11124859	25369731	34903867	75	0	0	1	1	0	1	37	92	19	100	60	6	9	1	2	0	0	0	0		0	0	2	1	583	583	583	583	142	23	185	9	5	0	0	0	0	0	0	2	1	400	0	0	1	0
15010968	29991826	34905235	54	0	0	0	0	0	0	38	92	20	99	93	13	11	1	1	0	1	0	0		0	0	3	1	636	636	636	636	226	61	294	17	5	0	0	0	0	0	1	2	1	600	0	0	0	1
14216212	23315493	34916665	41	0	0	0	0	0	1	37	100	19	99	72	11	8	0	2	1	1	0	0		0	0	2	1	782	782	782	782	82	39	107	4	2	0	0	0	0	0	1	2	1	600	0	0	0	1
19204348	24648000	34921368	92	0	1	1	1	1	1	37	61	17	98	60	16	7	4	1	1	1	1	0	0	0	0	3	1	1150	1150	1150	1150	80	74	104	12	1	0	1	0	0	1	0	2	1	1000	0	0	0	0
11374776	23440405	34927785	79	0	1	0	0	0	0	38	75	22	100	95	12	11	1	2	1	1	1	0	1	0	0	3	1	153	153	153	153	151	32	196	18	5	0	1	0	0	0	1	2	1	400	0	0	1	0
11892926	25751330	34933179	78	0	1	0	0	1	1	39	107	25	100	92	15	14	1	2	0	1	1	0	1	0	0	2	1	462	462	462	462	128	36	166	18	7	0	0	0	0	0	1	2	1	400	0	0	1	0
11971247	22867091	34949472	68	0	0	1	0	1	1	37	110	23	94	116	22	9	1	1	1	1	0	0		0	0	2	1	734	734	734	734	117	40	152	10	3	0	0	0	0	0	1	2	1	600	0	0	0	1
17274271	26419335	34952879	73	0	0	0	0	1	1	37	83	21	94	80	11	10	1	2	0	1	0	0		0	0	3	1	1101	1101	1101	1101	117	17	152	17	5	0	0	0	0	0	1	2	1	1000	0	0	0	0
17795409	25237087	34955883	68	0	1	0	0	0	1	38	79	18	100	71	8	7	1	1	0	1	0	0		0	0	3	1	480	480	480	480	180	53	234	8	4	0	0	0	0	1	1	2	1	400	0	0	1	0
11320011	27172472	34962562	63	1	0	1	1	0	1	36	112	13	87	44	27	10	1	4	1	1	0	0		0	0	3	1	1969	1969	1969	1969	138	59	179	18	18	1	1	1	1	1	1	2	1	1800	0	0	0	0
15099669	21347583	34965363	69	1	0	0	0	0	0	37	71	16	100	60	7	10	1	1	0	1	1	1	0	0	0	4	1	201	201	201	201	242	66	315	28	15	0	0	0	0	0	1	1	0	200	0	1	0	0
19519559	29526928	34970831	73	1	0	1	0	0	0	36	111	15	99	90	7	9	1	1	1	1	0	0		0	0	4	1	172	172	172	172	194	46	252	5	2	0	0	0	0	1	0	2	1	400	0	0	1	0
15353701	24016936	34974668	85	0	1	0	0	1	1	36	108	21	98	54	12	8	1	2	1	1	0	0		0	0	3	1	294	294	294	294	180	27	234	24	16	0	1	0	0	1	1	2	1	400	0	0	1	0
10327579	28374991	34975173	31	0	0	0	0	1	1	36	123	29	100	84	28	7	7	3	1	1	0	0		0	0	4	1	332	332	332	332	155	66	202	19	7	0	0	0	0	0	1	2	1	400	0	0	1	0
13919434	21895161	34976625	82	1	0	0	1	0	1	36	62	12	100	61	12	10	1	2	0	0	0	0		0	0	2	1	230	230	230	230	203	82	264	4	2	0	0	0	0	0	1	1	0	200	0	1	0	0
11728785	25801255	34980648	23	1	0	0	0	0	0	38	89	18	99	81	13	15	1	1	0	1	1	1	0	0	0	5	1	647	647	647	647	180	57	234	14	3	0	0	0	0	1	1	2	1	600	0	0	0	1
15097127	27839966	34987065	27	1	0	0	0	1	1	37	122	24	97	103	13	8	1	1	1	1	1	0	0	0	1	7	1	2849	2849	2849	2849	149	71	196	24	7	0	0	0	0	0	1	2	1	2000	0	0	0	0
19934922	24963062	34990349	91	1	0	0	0	0	0	35	59	16	100	84	11	10	1	2	1	1	0	0		0	0	8	1	175	175	175	175	172	50	224	9	3	0	0	0	0	1	1	2	1	400	0	0	1	0
11493825	28762686	34993835	75	1	0	0	0	0	1	37	85	19	94	63	13	12	1	1	1	1	0	0		0	0	2	1	170	170	170	170	214	14	278	6	3	0	0	0	0	0	1	2	1	400	0	0	1	0
15274953	25337582	34994388	79	0	1	0	0	1	1	37	52	12	100	64	18	8	4	1	0	0	1	1	0	0	1	5	1	662	662	662	662	138	37	179	35	20	0	0	0	0	1	1	2	1	600	0	0	0	1
15808752	22526777	34997263	71	1	1	0	1	0	1	37	82	10	96	70	21	8	1	2	1	1	0	0		0	0	2	1	675	2239	675	1457	109	20	186	8	9	1	1	1	1	1	1	2	1	600	0	0	0	1
19929294	28617572	34997867	88	0	1	0	0	1	1	37	80	34	94	57	25	7	3	2	1	1	0	0		0	0	3	1	1717	1717	1717	1717	123	30	160	8	3	1	1	1	0	0	0	2	1	1600	0	0	0	0
17874073	24751437	34998010	88	0	1	1	1	1	1	37	74	18	98	73	20	10	2	4	0	1	0	0		0	0	5	1	71	71	71	71	243	28	316	14	2	0	0	0	0	1	1	1	0	200	0	1	0	0
18711331	29023380	35011146	65	1	0	0	1	0	1	37	89	16	97	61	4	8	1	1	0	1	0	0		0	0	2	1	543	543	543	543	77	19	100	4	4	1	1	1	1	0	1	2	1	400	0	0	1	0
16024297	25258068	35022945	74	0	0	0	0	0	0	37	112	34	99	69	9	9	1	2	0	1	0	0		0	0	2	1	2361	2361	1825	2093	158	14	205	8	3	0	0	0	0	1	1	2	1	2000	0	0	0	0
10020740	23831430	35026312	56	0	0	1	0	0	1	37	91	16	100	60	5	8	1	2	0	1	0	0		0	0	2	1	659	659	384	522	98	17	127	45	7	0	0	0	0	0	1	2	1	600	0	0	0	1
18078962	20860698	35028403	85	0	0	1	0	1	0	37	49	23	100	68	10	7	1	2	1	1	1	0	1	0	0	2	1	182	182	182	182	181	55	229	5	3	0	0	0	0	0	1	2	1	400	0	0	1	0
10719998	24275223	35028535	82	0	0	0	0	1	1	39	91	21	96	87	7	7	1	2	1	1	0	0		0	0	5	1	231	231	215	223	117	165	177	15	14	0	0	0	0	0	1	2	1	400	0	0	1	0
14296756	24456647	35029856	84	0	0	0	0	0	1	37	127	21	100	76	8	10	1	2	1	1	0	0		0	0	4	1	2256	2256	2255	2256	176	74	229	6	2	1	1	0	0	0	0	2	1	2000	0	0	0	0
13042648	26157365	35031845	75	1	1	0	0	0	1	37	116	20	86	58	21	10	2	4	0	1	1	1	1	0	0	4	1	542	542	542	542	112	15	146	17	18	1	1	1	1	1	1	2	1	400	0	0	1	0
12021129	22248492	35032965	56	0	0	1	0	1	1	37	94	19	96	112	7	7	2	1	1	1	0	0		0	0	2	1	211	211	211	211	112	24	146	9	1	0	0	0	0	0	1	2	1	400	0	0	1	0
13846458	20725992	35033233	67	1	0	0	1	0	0	36	78	9	97	63	11	9	1	2	0	1	0	0		0	0	3	1	700	700	700	700	147	52	191	5	2	0	0	0	0	1	0	2	1	600	0	0	0	1
13945274	28995759	35034234	67	0	0	1	0	1	1	37	91	23	99	67	11	8	2	2	1	1	1	1	1	0	0	7	1	491	491	491	491	107	11	139	15	16	1	1	1	1	0	1	2	1	400	0	0	1	0
17745788	22976764	35037502	53	0	0	0	0	0	1	37	140	14	97	51	6	6	2	2	0	1	1	0	0	0	1	2	1	70	70	70	70	131	5	170	31	8	0	0	0	0	0	1	1	0	200	0	1	0	0
14918997	27626920	35042023	41	0	0	0	0	0	1	37	103	22	97	73	15	8	1	1	1	1	0	0		0	0	4	1	47	47	47	47	235	22	306	3	1	0	0	0	0	1	0	1	0	200	0	1	0	0
10352416	21251271	35043893	24	0	0	0	0	0	1	39	119	18	96	46	5	10	1	3	0	1	0	0		0	0	4	1	17845	17845	17845	17845	89	78	116	12	12	1	1	1	1	1	1	2	1	2000	0	0	0	0
18078692	26545545	35047635	67	0	1	1	0	1	1	37	128	24	95	65	12	8	2	1	1	1	1	0	1	0	0	9	1	1049	1049	1049	1049	116	127	151	20	21	1	1	1	1	1	1	2	1	1000	0	0	0	0
12750983	23753109	35049634	53	0	0	0	0	0	1	35	110	18	96	93	9	10	1	1	0	1	1	1	1	1	1	3	1	288	288	288	288	116	32	151	45	45	0	1	0	0	1	1	1	0	200	0	1	0	0
19796205	29475977	35051750	79	1	0	0	0	0	0	37	123	36	97	81	8	13	2	4	0	1	1	1	1	1	0	2	1	1011	1011	1011	1011	87	10	113	57	15	0	1	1	0	0	1	2	1	1000	0	0	0	0
14219654	23339760	35052527	64	0	0	0	0	0	0	37	81	9	100	66	18	11	1	1	0	1	0	0		0	0	2	1	291	291	291	291	119	22	155	24	10	0	0	0	0	0	1	1	0	200	0	1	0	0
19650283	24521702	35058579	80	1	0	1	0	0	0	38	135	8	99	82	14	10	2	2	0	1	0	0		0	0	8	1	273	273	273	273	133	6	173	9	4	0	0	0	0	1	1	1	0	200	0	1	0	0
18409161	21208436	35058916	29	0	0	0	0	0	1	37	110	20	97	89	10	7	1	3	0	1	1	0	0	0	1	7	1	502	502	502	502	89	95	116	86	15	0	0	0	0	1	1	2	1	400	0	0	1	0
10500002	27599129	35068745	64	0	0	1	0	0	1	37	81	19	100	78	20	6	1	2	0	1	1	0	0	0	1	3	1	628	628	628	628	111	15	144	21	7	0	0	0	0	1	1	2	1	600	0	0	0	1
10847398	24462503	35072114	47	1	0	0	0	0	1	38	85	18	97	55	14	9	2	2	0	1	1	0	1	0	0	5	1	6465	6465	6465	6465	126	163	164	59	5	0	0	0	0	0	1	2	1	2000	0	0	0	0
16442703	26707548	35080565	73	0	1	0	1	0	1	36	86	16	100	98	13	8	2	3	1	1	1	1	0	0	1	11	1	1158	1158	1158	1158	184	23	239	42	41	0	1	1	1	1	1	2	1	1000	0	0	0	0
12373771	26260875	35080853	70	1	0	0	0	0	1	37	56	15	100	72	11	10	2	1	0	1	0	0		0	0	4	1	29	29	29	29	266	51	346	8	6	0	0	0	0	0	1	0	0	0	1	0	0	0
18425495	25117070	35090086	73	1	0	0	0	0	1	37	75	16	93	70	25	10	1	1	1	1	0	0		0	0	3	1	513	513	513	513	160	13	208	6	3	0	0	0	0	0	0	2	1	400	0	0	1	0
12769244	21023771	35092097	35	0	0	0	0	0	0	37	123	27	96	65	4	11	2	1	0	1	0	0		0	0	5	1	600	600	600	600	156	11	203	29	17	0	0	0	0	0	0	2	1	600	0	0	0	1
17176996	25317420	35102151	76	0	1	1	1	0	1	37	83	26	99	75	10	7	1	1	0	0	1	1	0	0	1	6	1	544	544	544	544	165	31	215	78	44	0	1	1	0	1	1	2	1	400	0	0	1	0
19207300	24889622	35102717	58	0	1	0	0	0	0	37	50	10	100	72	9	10	1	1	1	1	1	0	0	0	0	4	1	322	322	322	322	193	84	251	50	10	0	1	0	0	1	1	2	1	400	0	0	1	0
11926708	22514839	35103292	46	0	0	0	0	0	0	38	118	28	96	81	14	10	2	4	0	1	1	0	0	0	0	16	1	27363	27363	27363	27363	172	276	224	20	12	0	0	0	0	1	1	2	1	2000	0	0	0	0
13307062	21970689	35105804	62	1	0	1	0	0	0	37	114	28	97	91	11	10	1	2	1	0	0	0		0	0	3	1	226	226	226	226	118	15	153	17	8	0	0	0	0	0	0	2	1	400	0	0	1	0
12328821	23392763	35113212	65	0	0	1	0	0	1	38	122	31	95	108	19	10	1	1	1	0	0	0		0	0	2	1	341	341	341	341	173	30	225	3	2	0	0	0	0	0	0	2	1	400	0	0	1	0
17122590	22540551	35122136	57	0	0	1	0	1	1	38	100	11	97	113	16	13	3	1	0	1	0	0		0	0	4	1	502	502	502	502	179	26	233	15	8	0	0	0	0	0	1	2	1	400	0	0	1	0
11925157	28434553	35135657	55	1	0	0	0	0	1	37	92	11	99	101	7	13	1	1	0	1	0	0		0	0	3	1	769	769	769	769	137	168	178	3	1	0	0	0	0	0	0	2	1	600	0	0	0	1
12021223	23038617	35145172	38	0	0	0	0	0	0	37	85	16	100	68	7	9	1	1	1	1	1	1	0	0	0	4	1	54	54	54	54	152	39	198	51	31	0	0	0	0	1	1	1	0	200	0	1	0	0
16250163	28818141	35158186	61	0	1	0	1	0	0	36	82	19	86	65	11	11	1	1	0	1	0	0		0	0	5	1	283	283	283	283	259	122	337	6	3	1	1	0	0	0	1	1	0	200	0	1	0	0
18464206	22104810	35162473	78	1	0	0	1	0	1	37	94	20	96	66	17	10	1	1	0	0	1	0	0	0	1	2	1	407	407	324	366	143	32	186	17	4	0	0	0	0	0	1	2	1	400	0	0	1	0
14501540	29243352	35166263	47	0	0	0	0	0	0	35	68	11	100	76	7	9	0	1	1	1	0	0		0	0	3	1	290	290	290	290	168	20	218	9	3	0	0	0	0	0	0	2	1	400	0	0	1	0
11208729	22877661	35168369	52	0	0	0	0	0	0	37	79	16	100	86	3	7	1	1	1	1	0	0		0	0	3	1	17	17	17	17	174	56	227	5	2	0	0	0	0	0	1	1	0	200	0	1	0	0
12527525	21024648	35176022	73	0	1	0	1	0	1	38	99	16	96	75	20	11	5	2	0	1	1	1	0	0	0	11	1	696	696	696	696	137	44	181	22	5	0	0	0	0	1	1	2	1	600	0	0	0	1
12316990	22158922	35178076	37	0	1	0	0	0	0	38	113	25	100	67	14	14	3	4	0	1	1	0	0	0	1	4	1	15368	15368	15368	15368	208	127	270	27	17	0	0	0	0	1	1	2	1	2000	0	0	0	0
19733783	25614483	35185214	75	1	0	0	0	0	1	37	113	14	90	70	1	9	1	1	1	1	0	0		0	0	2	1	663	663	663	663	113	15	147	13	3	0	0	0	0	0	1	2	1	600	0	0	0	1
12356016	23783887	35186004	85	0	1	1	1	1	1	37	111	11	95	88	18	11	2	1	0	0	0	0		0	0	2	1	156	156	156	156	229	70	298	6	4	1	1	1	1	0	1	1	0	200	0	1	0	0
13877014	28300019	35186206	77	1	0	0	0	0	0	37	73	21	96	64	15	11	0	3	0	1	0	0		0	0	3	1	564	564	564	564	92	15	120	16	6	1	1	0	0	0	1	2	1	400	0	0	1	0
11340930	20313589	35192840	67	0	1	1	1	1	1	37	94	23	100	92	11	11	5	2	0	1	1	0	0	0	1	4	1	445	445	445	445	217	50	282	10	4	1	1	0	0	0	1	2	1	400	0	0	1	0
12972749	21282654	35194295	48	1	0	0	0	0	0	37	90	24	100	121	9	12	1	1	1	1	0	0		0	0	2	1	59	59	59	59	335	86	436	17	17	0	0	0	0	0	1	1	0	200	0	1	0	0
18786429	29927537	35194321	58	0	0	0	0	0	0	37	78	15	100	101	15	12	1	1	1	0	0	0		0	0	2	1	216	216	216	216	179	99	233	9	3	0	0	0	0	0	0	2	1	400	0	0	1	0
10236942	21834040	35201523	64	0	0	0	0	0	0	39	98	22	95	56	1	6	1	3	0	1	1	0	0	1	0	15	1	36012	41860	33281	35657	87	88	117	15	1	1	1	1	1	1	1	2	1	2000	0	0	0	0
18397567	29160138	35203741	65	0	1	1	0	1	1	34	49	13	100	94	15	7	2	1	0	1	0	0		0	0	2	1	49	58	49	54	193	49	251	11	1	0	0	0	0	0	1	1	0	200	0	1	0	0
15129003	26916541	35205370	53	0	0	0	0	0	1	37	81	20	100	66	8	8	1	2	1	1	0	0		0	0	2	1	1157	1208	1157	1183	79	26	131	31	31	0	0	0	0	0	1	2	1	1000	0	0	0	0
19765159	22647428	35217054	100	0	1	0	0	1	1	37	88	24	98	70	19	6	3	2	1	0	0	0		0	0	2	1	41	41	41	41	227	10	295	15	2	0	0	0	0	0	1	1	0	200	0	1	0	0
17227918	28916521	35223380	77	0	1	0	0	1	0	37	96	17	99	78	13	12	1	3	1	1	0	0		0	0	2	1	3078	3078	3078	3078	156	61	207	3	3	1	1	1	1	1	1	2	1	2000	0	0	0	0
10476303	26499546	35225810	66	0	1	1	0	1	1	37	72	20	93	86	12	8	4	1	0	1	0	0		0	0	3	1	242	390	242	316	162	54	207	23	23	0	0	0	0	0	1	1	0	200	0	1	0	0
16597917	28520789	35233543	68	1	1	1	1	0	1	37	60	20	97	63	9	9	2	2	0	1	1	0	1	0	1	6	1	223	223	223	223	166	28	216	18	3	0	0	0	0	0	0	1	0	200	0	1	0	0
10347234	29659942	35242188	95	0	0	0	1	1	1	36	113	14	95	78	7	10	1	1	1	0	1	0	0	1	1	4	1	413	413	413	413	140	70	183	31	20	0	1	1	0	1	1	2	1	400	0	0	1	0
19758118	26218114	35262769	86	1	1	0	0	0	1	37	78	15	100	55	10	8	1	2	1	1	0	0		0	0	2	1	196	196	196	196	248	270	322	5	4	0	0	0	0	0	1	2	1	400	0	0	1	0
10335539	27771354	35269645	63	0	0	1	0	0	1	37	68	14	97	70	26	7	2	2	0	1	1	0	0	0	0	8	1	1009	1009	1009	1009	106	37	138	30	24	0	0	0	0	1	1	2	1	1000	0	0	0	0
19777866	26641186	35280727	71	1	0	0	1	0	1	37	76	18	99	101	15	8	1	1	0	1	0	0		0	0	4	1	129	129	129	129	123	8	160	8	2	0	0	0	0	1	0	1	0	200	0	1	0	0
19933011	27437666	35282970	64	0	0	0	0	1	1	36	98	17	94	78	6	8	5	1	1	0	0	0		0	0	4	1	1254	1254	1254	1254	128	103	166	4	2	0	0	0	0	0	1	2	1	1200	0	0	0	0
16247720	29543642	35286776	66	1	0	0	0	0	1	37	92	26	96	57	14	11	1	2	1	1	0	0		0	0	2	1	232	232	232	232	219	29	285	7	3	0	0	0	0	0	1	2	1	400	0	0	1	0
18019825	21387908	35289144	66	1	1	1	1	0	0	37	99	20	100	98	12	12	2	3	1	1	0	0		0	0	4	1	620	620	620	620	112	73	146	9	4	0	0	0	0	1	1	2	1	600	0	0	0	1
12734486	28158953	35300342	61	0	1	0	0	0	0	37	74	18	94	86	5	11	2	2	0	1	0	0		0	0	3	1	330	330	330	330	133	42	173	4	1	0	0	0	0	0	0	1	0	200	0	1	0	0
14951133	25916072	35305163	67	0	1	1	0	0	0	37	77	32	87	80	11	10	1	2	1	1	1	1	0	1	1	2	1	578	578	578	578	137	35	178	27	27	0	0	0	0	0	1	2	1	400	0	0	1	0
10244629	29363741	35307109	61	0	1	0	0	0	1	37	94	10	98	78	12	14	1	1	0	1	0	0		0	0	4	1	536	536	536	536	222	86	289	14	3	0	0	0	0	0	0	2	1	400	0	0	1	0
13308618	22163240	35308218	58	0	0	1	0	0	1	37	131	21	100	106	13	8	1	4	0	0	0	0		0	0	3	1	23	23	23	23	217	30	282	2	2	0	0	0	0	0	1	0	0	0	1	0	0	0
16501624	29162426	35309425	61	1	0	1	0	0	0	38	91	30	94	86	3	13	2	2	0	1	0	0		0	0	5	1	742	742	742	742	162	14	211	8	2	0	0	0	0	0	1	2	1	600	0	0	0	1
11579432	29470759	35310073	29	0	0	0	0	0	0	37	68	22	100	85	13	11	1	4	0	1	1	1	1	0	0	3	1	984	984	984	984	147	32	191	57	16	0	0	0	0	1	1	2	1	800	0	0	0	0
18124734	24460474	35311899	71	0	0	0	0	0	0	37	52	18	87	87	5	12	1	1	1	1	0	0		0	0	2	1	145	145	145	145	220	20	286	29	3	0	1	1	0	0	0	1	0	200	0	1	0	0
14199927	29141052	35312153	80	1	0	1	0	0	0	39	116	26	95	62	9	10	1	2	0	1	0	0		0	0	5	1	1496	1730	1496	1613	67	14	122	25	25	0	0	0	0	0	1	2	1	1400	0	0	0	0
11971366	28351193	35313103	52	0	0	0	0	0	1	37	72	25	100	70	18	9	1	1	1	1	0	0		0	0	4	1	464	464	464	464	170	10	221	9	2	0	0	0	0	1	0	2	1	400	0	0	1	0
14781801	20939269	35314595	59	0	0	0	0	0	1	37	100	20	95	57	3	7	1	1	0	1	0	0		0	0	4	1	784	784	784	784	138	26	179	6	1	0	0	0	0	0	0	2	1	600	0	0	0	1
13806858	28277368	35317152	56	1	0	1	0	0	1	37	87	26	91	72	3	12	1	4	1	1	0	0		0	0	4	1	61	61	61	61	167	45	217	60	20	0	1	1	0	1	1	1	0	200	0	1	0	0
12158416	25758818	35324484	25	0	0	0	0	0	1	37	90	22	98	82	11	14	3	2	0	1	0	0		0	0	2	1	8993	8993	4665	6829	157	39	204	15	2	0	0	0	0	1	1	2	1	2000	0	0	0	0
16235105	21832921	35336504	71	1	0	0	0	0	1	38	76	28	98	80	40	10	1	2	0	1	0	0		0	0	2	1	563	563	448	506	165	44	217	26	26	1	1	1	1	0	1	2	1	400	0	0	1	0
12812042	28574278	35336938	43	0	0	0	0	0	1	36	91	17	96	82	6	7	1	4	1	1	1	0	0	1	0	8	1	287	287	287	287	103	112	134	2	2	1	1	1	1	0	1	2	1	400	0	0	1	0
19852197	25125510	35338578	83	0	1	1	0	1	1	37	93	24	95	121	1	8	2	2	0	1	0	0		0	0	3	1	643	643	643	643	142	19	185	17	1	0	0	0	0	0	0	2	1	600	0	0	0	1
16129840	21832993	35338693	88	1	0	1	1	0	0	36	62	17	94	44	11	8	1	2	1	1	0	0		0	0	2	1	408	408	408	408	115	37	150	10	3	0	1	0	0	0	1	2	1	400	0	0	1	0
15804446	21070467	35342023	57	1	0	1	0	0	0	37	92	22	95	68	30	8	1	1	1	1	1	0	0	1	0	3	1	521	521	413	467	240	25	181	14	8	0	0	0	0	0	1	2	1	400	0	0	1	0
17224076	26998550	35342634	91	1	0	0	0	0	0	37	74	17	94	69	16	10	1	1	1	1	0	0		0	0	2	1	23	23	23	23	275	37	358	6	2	0	0	0	0	0	1	1	0	200	0	1	0	0
18230098	27227984	35347922	88	0	1	1	1	1	0	37	81	23	97	87	10	8	3	1	1	1	1	0	0	0	1	3	1	356	356	356	356	190	35	247	11	6	0	0	0	0	0	1	2	1	400	0	0	1	0
11939697	20586822	35348152	69	0	0	0	0	0	0	36	59	16	100	65	18	10	1	1	0	1	0	0		0	0	2	1	283	283	283	283	149	15	194	18	11	0	0	0	0	0	0	1	0	200	0	1	0	0
17162240	20966809	35356603	38	0	0	0	0	0	0	39	122	32	86	80	14	15	2	3	0	1	1	1	0	0	0	6	1	445	445	445	445	134	61	176	21	16	0	0	0	0	1	1	2	1	400	0	0	1	0
13850641	20247653	35362593	77	1	1	1	0	0	1	36	65	12	100	121	16	9	2	2	1	1	0	0		0	0	4	1	690	690	690	690	151	71	196	12	12	1	1	0	0	0	1	2	1	600	0	0	0	1
15869567	23821738	35363249	42	0	0	0	0	0	1	38	110	22	100	84	7	9	1	2	1	1	0	0		0	0	5	1	608	608	585	597	102	111	131	16	4	0	0	0	0	0	1	2	1	600	0	0	0	1
15060481	29880504	35363279	31	1	0	0	0	0	0	36	82	12	98	68	5	9	0	2	0	1	0	0		0	0	3	1	358	358	358	358	257	39	334	3	1	0	0	0	0	0	1	1	0	200	0	1	0	0
17481329	27532263	35373729	82	1	1	1	0	0	1	37	95	23	98	82	12	8	2	1	1	1	0	0		0	0	2	1	79	79	79	79	163	83	212	7	3	0	0	0	0	0	1	1	0	200	0	1	0	0
19494071	28014659	35377501	55	1	0	0	0	0	1	36	97	19	100	72	6	8	1	2	0	1	0	0		0	0	2	1	309	309	309	309	184	57	239	60	26	0	1	0	0	0	1	1	0	200	0	1	0	0
16304014	22759048	35377764	66	1	0	0	0	0	1	37	88	20	96	79	23	7	3	1	1	1	0	0		0	0	4	1	1396	1396	1396	1396	171	229	222	7	2	0	0	0	0	0	0	2	1	1200	0	0	0	0
19111691	20760500	35384249	67	1	0	1	0	0	1	36	83	27	94	62	13	11	2	1	0	1	1	0	1	0	1	5	1	263	263	263	263	152	37	198	17	17	0	0	0	0	1	1	1	0	200	0	1	0	0
14387068	26322699	35385154	55	0	0	0	0	0	0	37	87	19	96	67	15	9	2	2	0	1	0	0		0	0	2	1	674	674	674	674	47	54	61	22	3	0	1	0	0	0	1	2	1	600	0	0	0	1
10232286	20559188	35388673	67	1	0	0	0	0	1	37	93	12	98	70	16	7	2	3	0	1	1	0	1	0	0	11	1	334	334	334	334	70	25	74	18	6	1	1	0	0	1	1	1	0	200	0	1	0	0
17293450	25945017	35388967	54	1	0	0	0	0	1	37	97	21	96	119	37	13	2	1	0	1	1	0	0	0	1	9	1	1292	1292	1292	1292	116	82	151	13	9	0	0	0	0	1	1	2	1	1200	0	0	0	0
13962231	26173460	35389239	57	0	1	1	0	0	0	37	135	23	99	76	15	14	4	3	1	1	1	0	1	0	0	4	1	248	248	248	248	347	40	451	23	19	0	0	0	0	1	1	2	1	400	0	0	1	0
14071688	23333715	35395023	89	0	0	0	0	1	0	37	94	19	96	61	13	8	2	1	1	1	1	1	0	0	0	3	1	139	139	139	139	216	46	281	52	52	0	1	0	0	0	1	1	0	200	0	1	0	0
17279816	20987142	35402921	86	1	0	0	1	0	1	37	72	15	99	101	7	10	1	1	1	0	0	0		0	0	4	1	45	45	45	45	220	22	286	4	2	0	0	0	0	0	0	1	0	200	0	1	0	0
14016862	22548144	35408906	62	0	0	0	0	0	0	38	87	23	92	49	13	13	1	1	1	1	0	0		0	0	2	1	30	30	30	30	303	112	394	7	4	0	0	0	0	0	0	1	0	200	0	1	0	0
10289851	24542572	35410487	93	1	0	0	0	1	0	36	105	20	97	51	30	12	5	2	0	1	0	0		0	0	8	1	308	308	308	308	70	66	91	2	2	1	1	1	1	1	1	1	0	200	0	1	0	0
16900375	22956799	35414722	65	1	0	0	0	0	0	37	67	16	99	67	7	11	0	1	0	1	1	0	0	0	1	2	1	373	373	373	373	155	29	202	30	31	0	0	0	0	0	1	1	0	200	0	1	0	0
10703181	20550557	35415553	47	0	0	1	0	0	1	37	109	23	100	86	10	8	1	2	1	1	0	0		0	0	2	1	87	87	87	87	220	128	286	12	1	0	0	0	0	0	1	1	0	200	0	1	0	0
13347662	23014630	35442781	88	0	0	1	0	0	0	37	95	16	100	68	24	9	1	2	1	1	1	0	1	0	0	2	1	341	341	341	341	105	24	137	12	8	1	1	0	0	0	1	2	1	400	0	0	1	0
17143462	27079837	35446806	92	1	0	0	0	0	1	36	79	18	100	49	11	8	1	1	1	1	0	0		0	0	5	1	328	328	328	328	100	12	130	6	5	1	1	1	0	1	1	2	1	400	0	0	1	0
13059186	22185210	35449238	64	0	0	1	0	1	1	36	89	19	100	95	1	8	4	2	1	0	1	0	0	1	1	7	1	36963	41860	33281	35657	127	65	161	58	2	1	1	1	1	0	1	2	1	2000	0	0	0	0
12346809	21731851	35456008	58	1	0	1	0	0	1	37	74	21	95	66	3	9	1	1	1	1	0	0		0	0	3	1	18	18	18	18	332	119	432	3	1	0	0	0	0	0	0	1	0	200	0	1	0	0
13454746	28481077	35459764	62	0	0	0	1	0	1	39	123	26	100	57	1	12	1	1	1	0	1	0	1	0	0	3	1	397	954	350	496	130	50	172	36	8	0	0	0	0	1	1	2	1	400	0	0	1	0
11557186	22752628	35469955	73	0	1	0	0	0	1	37	98	24	94	70	16	13	2	2	0	1	0	0		0	0	11	1	618	628	379	542	49	45	133	12	12	1	1	1	1	1	1	2	1	600	0	0	0	1
13121870	27370800	35473613	71	1	0	0	0	0	1	37	86	20	97	95	18	10	1	1	0	0	1	1	0	0	0	3	1	811	811	811	811	137	51	178	17	14	0	1	0	0	0	1	2	1	800	0	0	0	0
19063952	20736677	35475418	70	1	1	1	1	0	0	36	82	18	91	73	7	9	1	2	0	1	1	0	0	1	0	2	1	68	68	68	68	167	25	213	8	7	1	1	1	1	1	1	1	0	200	0	1	0	0
16574626	27801141	35484834	48	1	0	0	0	0	1	37	99	16	98	60	16	9	2	2	1	1	0	0		0	0	7	1	921	921	921	921	125	50	163	12	2	0	0	0	0	0	0	2	1	800	0	0	0	0
11276636	25215581	35486825	67	0	0	0	0	1	1	37	72	14	95	52	3	7	1	1	1	1	0	0		0	0	3	1	17	17	17	17	373	429	485	4	1	0	0	0	0	0	0	1	0	200	0	1	0	0
12945902	29086870	35490965	49	1	0	0	0	0	0	37	65	16	93	45	8	12	2	2	0	1	1	0	0	0	1	7	1	724	724	724	724	131	52	170	9	7	1	1	0	0	1	0	2	1	600	0	0	0	1
13895517	28962934	35497143	89	0	0	0	1	1	1	35	56	27	93	65	15	8	1	1	1	1	0	0		0	0	3	1	625	625	625	625	199	174	259	16	7	1	1	1	0	1	0	2	1	600	0	0	0	1
11254598	20111784	35500678	59	1	0	0	0	0	1	38	103	23	100	54	17	12	2	2	1	1	0	0		0	0	8	1	36963	41860	1299	28222	153	169	199	26	15	0	0	0	0	1	1	2	1	2000	0	0	0	0
14897163	29679473	35503068	49	0	0	0	0	0	0	37	74	18	100	89	4	9	1	1	0	1	0	0		0	0	2	1	383	383	383	383	136	22	177	10	8	0	0	0	0	0	1	1	0	200	0	1	0	0
15980060	26057495	35506798	61	0	0	1	1	0	0	37	101	15	92	54	40	11	2	3	1	1	1	0	0	0	1	4	1	612	612	612	612	133	10	173	39	13	0	1	1	0	1	1	2	1	600	0	0	0	1
11309915	25761953	35507582	76	1	1	0	0	0	0	36	68	30	86	44	26	6	1	4	1	1	1	0	0	1	0	5	1	157	157	157	157	117	13	152	14	2	1	1	1	0	0	1	2	1	400	0	0	1	0
12684652	23670917	35512760	91	0	1	1	1	1	1	37	85	13	98	94	6	11	2	3	0	1	0	0		0	0	2	1	653	653	653	653	153	26	199	20	20	1	1	1	1	0	1	2	1	600	0	0	0	1
17282544	27281422	35513226	25	0	0	0	0	0	0	37	93	22	97	106	20	7	3	2	1	1	0	0		0	0	8	1	13725	13725	13725	13725	130	203	169	5	1	0	0	0	0	0	1	2	1	2000	0	0	0	0
18653573	28849038	35513874	77	1	0	0	0	0	0	35	62	16	100	74	15	15	1	3	1	1	0	0		0	0	4	1	86	86	86	86	146	62	191	17	8	0	0	0	0	1	1	1	0	200	0	1	0	0
19289056	20871174	35515335	81	0	1	0	1	1	1	38	82	22	100	68	9	9	2	1	0	1	0	0		0	0	4	1	367	367	367	367	130	16	169	11	10	0	0	0	0	1	1	1	0	200	0	1	0	0
15978426	24638426	35520609	43	0	0	1	0	0	1	39	132	21	94	73	11	15	2	2	0	1	1	1	0	0	0	3	1	1057	1057	1057	1057	121	9	157	21	17	0	0	0	0	0	1	2	1	1000	0	0	0	0
16914056	21143839	35526338	56	0	1	0	0	1	0	36	84	20	98	49	11	9	4	2	1	1	1	0	1	0	1	2	1	1308	1308	1308	1308	37	51	48	26	9	0	0	0	0	1	1	2	1	1200	0	0	0	0
13119714	26274837	35545270	79	0	1	1	0	1	1	37	125	22	92	60	30	11	5	3	0	1	1	0	1	0	0	5	1	4249	4249	4249	4249	98	77	127	20	7	0	1	0	0	1	1	2	1	2000	0	0	0	0
12348638	26895520	35547667	83	0	0	0	0	1	1	37	59	22	100	72	10	7	1	2	0	1	0	0		0	0	4	1	621	621	621	621	106	13	138	5	2	0	1	0	0	1	0	2	1	600	0	0	0	1
15541773	26925248	35550825	58	0	0	0	0	1	1	37	67	11	98	84	9	9	8	2	0	1	1	0	0	1	1	8	1	1983	1983	1983	1983	142	69	185	48	11	0	0	0	0	0	1	2	1	1800	0	0	0	0
19163747	23600314	35553856	83	0	1	1	1	1	0	37	79	21	96	71	11	10	1	2	1	1	0	0		0	0	2	1	335	335	335	335	123	6	160	6	2	0	0	0	0	0	0	2	1	400	0	0	1	0
17204016	26865590	35553919	74	0	0	0	1	0	1	38	79	22	96	50	9	11	1	3	1	1	0	0		0	0	2	1	207	207	207	207	159	67	208	7	2	1	1	1	0	0	0	2	1	400	0	0	1	0
14762451	26731777	35557559	73	0	0	1	1	0	0	37	109	9	94	65	18	11	1	4	1	1	1	0	1	0	0	2	1	702	702	702	702	175	52	228	24	24	0	1	0	0	1	1	2	1	600	0	0	0	1
11339048	21776169	35560331	82	1	0	1	1	0	1	38	75	18	98	63	11	8	1	2	1	1	0	0		0	0	3	1	127	127	127	127	261	11	339	5	2	0	0	0	0	1	0	1	0	200	0	1	0	0
12117071	21758280	35565595	84	0	1	0	1	0	0	37	78	22	91	77	16	12	1	2	0	0	0	0		0	0	3	1	87	87	87	87	172	24	224	5	4	1	1	0	0	0	1	1	0	200	0	1	0	0
15848633	22232640	35569009	74	0	1	0	0	1	1	38	127	9	93	82	16	8	2	2	0	1	1	1	0	0	0	3	1	583	583	583	583	134	12	174	26	6	0	0	0	0	0	1	2	1	400	0	0	1	0
17880991	25433959	35574780	62	1	0	0	0	0	0	39	104	20	100	102	5	12	1	2	0	1	0	0		0	0	3	1	2108	2108	2108	2108	165	18	215	11	6	0	0	0	0	0	0	2	1	2000	0	0	0	0
14721276	20973745	35576505	57	1	0	0	0	0	0	36	97	24	96	62	40	10	3	1	0	1	0	0		0	0	6	1	1228	1228	1228	1228	100	15	130	42	15	0	0	0	0	1	1	2	1	1200	0	0	0	0
18874187	29461118	35579229	69	0	0	0	0	0	1	37	83	27	93	67	11	8	1	2	1	1	0	0		0	0	3	1	138	138	138	138	168	11	218	13	3	0	0	0	0	1	1	1	0	200	0	1	0	0
18092291	20400787	35594872	75	1	0	0	1	0	1	37	94	23	93	84	10	10	2	2	0	0	0	0		0	0	2	1	89	89	89	89	249	26	324	6	3	0	0	0	0	0	1	1	0	200	0	1	0	0
14672004	22666567	35598002	68	1	0	1	0	0	1	37	68	19	99	61	12	8	1	2	1	1	0	0		0	0	3	1	7759	7759	7759	7759	73	105	95	6	3	0	1	0	0	0	1	2	1	2000	0	0	0	0
15958770	24895093	35600501	76	0	0	0	0	1	1	36	97	18	99	65	1	9	2	3	0	1	1	0	0	1	0	17	1	3767	3767	3767	3767	74	103	96	31	17	1	1	1	1	1	1	2	1	2000	0	0	0	0
18031285	27334848	35603828	36	1	0	1	0	0	1	37	101	21	97	78	6	9	1	1	0	1	0	0		0	0	2	1	841	841	841	841	128	119	166	3	1	0	0	0	0	0	0	2	1	800	0	0	0	0
18250650	22080670	35606545	35	0	1	0	0	0	1	37	106	20	93	71	17	10	1	2	1	1	0	0		0	0	2	1	5472	5472	4103	4788	125	33	163	10	3	0	0	0	0	0	0	2	1	2000	0	0	0	0
14013637	21305636	35611212	79	1	1	0	0	0	0	37	74	20	97	55	12	12	1	2	1	1	1	1	0	0	0	3	1	178	178	178	178	112	26	146	20	20	0	0	0	0	0	1	2	1	400	0	0	1	0
19997367	20617667	35616526	63	0	0	0	0	0	0	36	94	11	100	61	9	11	1	3	1	1	0	0		0	0	5	1	492	492	492	492	149	25	194	29	25	0	0	0	0	1	1	2	1	400	0	0	1	0
19131048	20480844	35630749	82	1	0	0	0	0	1	37	132	35	93	69	11	9	1	4	1	1	1	0	1	1	1	8	1	236	320	226	261	67	8	144	101	31	0	0	0	0	1	1	2	1	400	0	0	1	0
15905118	23193067	35632600	59	0	0	0	0	0	0	36	93	28	100	85	4	9	1	1	0	0	1	1	0	0	0	2	1	762	762	762	762	83	13	108	23	16	0	0	0	0	0	1	2	1	600	0	0	0	1
19149543	25959699	35638151	69	1	0	0	0	0	1	37	68	16	92	76	15	8	1	2	1	1	0	0		0	0	3	1	170	170	170	170	105	27	137	4	4	0	0	0	0	1	0	2	1	400	0	0	1	0
13031876	20981083	35668605	54	0	0	0	1	0	0	36	140	20	94	90	13	10	1	3	0	1	0	0		0	0	5	1	1876	1876	1876	1876	83	105	108	30	11	0	1	1	0	0	1	2	1	1800	0	0	0	0
13227769	25596720	35669078	75	1	0	0	0	0	0	37	70	18	100	79	9	13	1	2	1	1	0	0		0	0	4	1	569	569	569	569	107	22	139	12	9	0	0	0	0	0	1	2	1	400	0	0	1	0
12200646	20376324	35670237	65	0	0	1	0	1	1	36	97	19	100	78	17	9	1	1	1	1	0	0		0	0	2	1	84	84	84	84	180	27	234	4	1	0	0	0	0	0	1	1	0	200	0	1	0	0
14055662	26465253	35673045	63	0	0	0	0	0	1	37	101	23	96	64	40	9	1	2	0	1	0	0		0	0	2	1	1038	1038	1038	1038	142	11	186	5	3	0	0	0	0	1	1	2	1	1000	0	0	0	0
19125782	26017299	35677228	76	1	0	1	0	0	1	36	107	33	98	66	40	7	4	2	1	1	1	1	1	1	1	4	1	3303	3303	3231	3267	146	119	190	49	16	0	0	0	0	1	1	2	1	2000	0	0	0	0
17710225	27239796	35677578	56	0	0	0	0	0	1	37	65	36	95	83	8	7	3	2	1	1	1	1	1	0	0	7	1	436	680	436	558	219	81	276	28	25	0	0	0	0	0	1	2	1	400	0	0	1	0
16693770	20039750	35680096	52	0	0	0	0	0	1	37	84	19	98	61	10	8	1	1	1	1	0	0		0	0	2	1	855	855	855	855	109	13	142	4	1	0	0	0	0	0	0	2	1	800	0	0	0	0
17266901	27662090	35680747	75	1	0	0	1	0	1	37	72	15	100	97	7	10	1	1	1	1	0	0		0	0	2	1	61	61	61	61	140	54	182	14	3	0	0	0	0	0	1	1	0	200	0	1	0	0
16010636	23530514	35682633	83	0	0	0	0	1	1	37	122	18	98	85	14	12	4	4	0	1	0	0		0	0	4	1	1070	1070	1070	1070	107	28	139	5	2	1	1	0	0	1	1	2	1	1000	0	0	0	0
11594609	28992088	35691097	84	0	1	0	0	0	1	37	72	22	97	65	14	10	2	1	1	1	0	0		0	0	4	1	774	774	774	774	127	42	165	3	4	1	1	1	1	1	1	2	1	600	0	0	0	1
16249993	24143343	35700389	70	0	0	0	0	0	0	37	81	16	98	105	11	10	1	2	0	1	0	0		0	0	3	1	262	262	262	262	206	32	268	6	5	1	1	1	0	0	1	1	0	200	0	1	0	0
15792361	20158794	35703530	40	1	1	0	0	0	0	37	87	24	97	59	31	11	3	3	0	1	0	0		0	0	4	1	1406	1406	1406	1406	177	33	230	15	8	0	0	0	0	1	1	2	1	1400	0	0	0	0
11958300	29768391	35705519	66	0	1	0	1	1	1	37	119	21	100	88	6	11	3	1	1	1	1	0	0	0	0	2	1	1647	1647	1647	1647	131	24	170	14	4	0	0	0	0	0	1	2	1	1600	0	0	0	0
14456839	27355503	35706441	40	0	0	0	0	0	1	37	104	22	96	86	30	8	1	2	1	1	0	0		0	0	6	1	21224	21224	21224	21224	200	295	260	6	2	0	0	0	0	0	0	2	1	2000	0	0	0	0
14552104	20889609	35708734	63	0	0	1	1	1	0	36	72	21	100	116	9	13	1	3	0	1	0	0		0	0	3	1	89	89	89	89	158	13	205	9	3	0	0	0	0	0	1	1	0	200	0	1	0	0
13010184	24492707	35712262	49	0	0	0	0	0	1	36	57	16	100	69	10	10	1	1	1	1	0	0		0	0	2	1	102	102	102	102	306	25	398	8	4	0	0	0	0	0	0	1	0	200	0	1	0	0
19579555	23664672	35712893	57	0	0	0	0	0	0	37	95	17	96	91	4	9	1	2	0	1	0	0		0	0	6	1	12995	12995	12995	12995	146	149	190	20	4	0	1	0	0	0	1	2	1	2000	0	0	0	0
16205808	26853910	35716041	63	1	1	0	0	0	0	36	96	24	94	71	17	10	1	1	1	1	1	1	0	0	1	2	1	346	346	346	346	169	53	220	27	27	1	1	1	1	0	1	2	1	400	0	0	1	0
16887555	28143695	35716501	76	0	0	0	0	0	0	37	87	26	97	59	24	13	5	3	0	1	0	0		0	0	12	1	4747	4747	4747	4747	98	55	127	10	4	1	1	1	1	1	1	2	1	2000	0	0	0	0
13993571	22440139	35722082	90	0	1	1	1	1	1	37	80	20	98	65	40	9	2	3	0	1	0	0		0	0	8	1	747	747	747	747	115	82	150	9	3	0	0	0	0	1	1	2	1	600	0	0	0	1
13762375	25116868	35722791	63	0	0	1	0	1	0	37	71	35	100	102	5	9	1	3	0	1	1	0	0	0	1	2	1	1981	1981	1981	1981	72	12	94	25	16	0	0	0	0	0	1	2	1	1800	0	0	0	0
14624785	29461908	35722937	79	1	0	1	1	0	1	38	78	31	90	106	10	12	1	1	0	1	0	0		0	0	3	1	1976	1976	1976	1976	159	24	207	8	4	0	0	0	0	0	1	2	1	1800	0	0	0	0
19378187	27173448	35733219	70	1	0	1	0	0	1	37	90	24	98	89	18	11	1	1	0	1	1	1	0	0	0	3	1	44	191	44	118	192	12	250	16	13	0	0	0	0	0	1	1	0	200	0	1	0	0
14812139	29742372	35734774	64	1	0	1	0	0	0	37	104	16	100	97	3	9	1	1	1	1	0	0		0	0	5	1	431	431	431	431	132	94	172	4	1	0	0	0	0	0	1	2	1	400	0	0	1	0
19297868	25776572	35750529	49	1	0	1	0	0	1	36	85	30	94	64	6	8	1	3	1	1	0	0		0	0	7	1	2678	2678	2678	2678	145	182	189	4	4	1	1	1	1	1	1	2	1	2000	0	0	0	0
16076666	29915290	35753223	79	0	1	0	1	0	1	37	90	15	96	78	9	9	2	2	1	0	1	1	0	0	0	13	1	295	295	295	295	184	54	242	11	8	0	0	0	0	1	1	2	1	400	0	0	1	0
16117084	25888886	35756924	67	0	1	1	0	1	1	37	110	24	97	66	13	9	5	2	1	1	0	0		0	0	6	1	495	495	495	495	76	23	99	42	14	0	1	0	0	1	1	2	1	400	0	0	1	0
16857416	25686585	35762622	91	0	1	0	0	1	1	34	58	18	93	106	26	11	3	1	1	1	1	0	0	0	0	4	1	275	275	275	275	88	27	114	19	8	0	0	0	0	1	1	2	1	400	0	0	1	0
11169203	29532088	35769981	74	1	0	0	0	0	0	37	102	34	99	44	4	12	1	3	1	1	1	0	1	1	0	2	1	665	665	665	665	91	10	62	35	18	0	1	1	0	1	1	2	1	600	0	0	0	1
17581611	21251516	35774420	86	0	0	0	0	1	1	36	95	20	100	70	15	9	3	2	0	1	1	1	1	0	0	3	1	554	554	554	554	105	62	137	33	7	0	0	0	0	1	1	2	1	400	0	0	1	0
19181195	29768725	35777876	34	0	0	0	0	0	1	38	113	15	91	77	9	10	1	3	0	1	0	0		0	0	4	1	435	435	435	435	136	13	177	12	7	0	0	0	0	1	1	2	1	400	0	0	1	0
19368813	20285379	35780155	67	0	0	0	0	1	1	37	64	18	98	72	11	7	1	1	0	1	0	0		0	0	3	1	169	169	169	169	131	16	170	9	2	0	0	0	0	1	0	1	0	200	0	1	0	0
13302031	20370659	35786353	83	1	1	1	0	0	1	36	99	29	95	52	28	10	1	2	1	1	1	1	0	0	0	2	1	375	375	375	375	145	39	189	23	22	0	1	0	0	0	1	2	1	400	0	0	1	0
19739493	23894396	35788723	24	0	0	0	0	0	0	34	67	20	100	69	11	10	1	2	0	1	0	0		0	0	5	1	210	221	210	216	126	71	166	1	5	1	1	1	1	1	0	1	0	200	0	1	0	0
15488800	20885290	35801856	88	1	0	0	0	0	1	36	82	20	94	62	25	11	1	2	0	1	0	0		0	0	3	1	133	133	133	133	164	200	213	20	2	0	0	0	0	0	0	1	0	200	0	1	0	0
14576761	21270856	35807915	42	0	0	0	0	0	1	38	118	20	95	96	16	11	2	3	0	1	0	0		0	0	15	1	11503	11503	9832	10423	99	148	129	3	3	1	1	1	1	1	1	2	1	2000	0	0	0	0
13787816	27126507	35808931	38	0	0	0	0	0	1	36	97	22	100	84	38	8	4	2	0	1	1	1	0	0	1	9	1	762	762	762	762	180	17	234	17	9	0	0	0	0	1	1	2	1	600	0	0	0	1
16773780	23749463	35810212	48	0	1	1	1	0	1	38	98	25	94	93	11	8	1	1	0	0	0	0		0	0	2	1	393	393	393	393	299	55	389	28	17	0	0	0	0	0	1	1	0	200	0	1	0	0
17421663	29871415	35817020	67	0	0	0	0	0	1	38	115	27	91	73	3	12	1	2	0	1	1	1	0	0	0	2	1	4431	4431	976	2704	126	28	164	24	12	0	0	0	0	0	1	2	1	2000	0	0	0	0
19854867	26364402	35817307	74	0	0	1	0	0	0	37	70	21	96	85	9	13	2	3	0	0	0	0		0	0	4	1	4516	4516	4516	4516	134	47	174	26	1	0	0	0	0	0	1	2	1	2000	0	0	0	0
13333527	20999229	35818552	73	1	1	0	0	0	1	37	70	19	98	63	16	9	1	1	1	1	0	0		0	0	2	1	1179	1179	1179	1179	117	24	152	11	11	1	1	1	1	1	1	2	1	1000	0	0	0	0
15241554	24200042	35827500	37	0	0	0	0	0	1	39	94	34	98	64	5	9	1	1	0	0	0	0		0	0	4	1	1255	1255	1255	1255	281	346	365	10	7	0	0	0	0	0	1	2	1	1200	0	0	0	0
11970870	22533225	35831641	52	0	0	1	0	0	1	37	96	21	100	49	14	12	1	2	0	1	0	0		0	0	8	1	318	318	318	318	192	214	250	5	3	0	0	0	0	1	1	1	0	200	0	1	0	0
17291331	25103468	35835573	92	1	0	0	0	0	1	37	96	27	100	86	6	8	2	2	0	1	0	0		0	0	4	1	307	307	307	307	146	32	190	3	3	1	1	1	1	1	1	1	0	200	0	1	0	0
15292104	26773769	35838714	67	1	0	0	0	0	1	37	105	21	100	74	11	9	2	2	1	1	0	0		0	0	5	1	957	957	957	957	112	35	146	17	8	0	0	0	0	0	1	2	1	800	0	0	0	0
11900721	26858236	35845211	73	1	0	1	0	0	1	37	76	17	94	63	7	10	3	3	1	0	0	0		0	0	7	1	43	43	43	43	104	57	135	18	3	0	0	0	0	0	1	1	0	200	0	1	0	0
11867852	22503315	35847712	47	0	0	0	0	0	1	36	119	17	96	76	11	9	1	2	1	1	0	0		0	0	7	1	4310	4310	4310	4310	80	16	208	5	2	0	0	0	0	1	0	2	1	2000	0	0	0	0
11529880	23694167	35850934	62	0	1	0	0	0	1	38	115	20	98	94	28	11	1	2	1	1	0	0		0	0	4	1	970	970	970	970	109	42	142	12	3	0	0	0	0	1	1	2	1	800	0	0	0	0
12246903	22717303	35853751	80	0	0	1	0	1	1	37	49	20	99	55	26	10	1	4	1	1	1	0	1	0	0	6	1	91	91	91	91	165	19	215	24	4	0	0	0	0	1	1	1	0	200	0	1	0	0
19342453	21685177	35861066	73	0	1	1	0	0	0	37	97	30	98	92	12	10	1	2	1	1	1	0	0	0	0	3	1	35	35	35	35	168	47	215	8	8	1	1	1	1	1	1	1	0	200	0	1	0	0
14004886	22525944	35865191	54	0	0	0	0	0	1	37	70	21	95	52	7	10	1	1	1	1	0	0		0	0	2	1	181	181	181	181	112	5	146	3	2	0	0	0	0	0	0	2	1	400	0	0	1	0
15987934	21386394	35868193	36	0	1	0	0	0	1	37	119	37	97	76	18	10	0	3	1	1	1	1	1	1	0	6	1	1350	1350	1350	1350	147	50	195	64	26	0	0	0	0	1	1	2	1	1200	0	0	0	0
19561246	20468986	35868625	36	0	0	0	0	0	1	36	87	35	95	96	12	8	1	1	1	1	0	0		0	0	4	1	804	804	804	804	155	68	203	11	5	0	0	0	0	0	1	2	1	800	0	0	0	0
15824431	20686251	35878467	39	0	0	0	0	0	0	36	60	12	96	69	9	13	2	3	0	1	1	1	1	0	0	2	1	515	515	515	515	142	63	185	17	15	0	0	0	0	0	1	2	1	400	0	0	1	0
10206590	26927205	35881376	88	0	0	0	0	1	1	37	87	16	99	87	12	8	2	2	1	1	0	0		0	0	3	1	188	188	188	188	109	12	142	13	9	0	1	0	0	0	1	2	1	400	0	0	1	0
16635339	21601593	35888365	69	0	1	0	0	0	1	37	114	17	100	51	17	7	1	3	1	1	0	0		0	0	4	1	1900	1900	1900	1900	171	19	222	8	4	0	0	0	0	1	1	2	1	1800	0	0	0	0
13005415	29054545	35889100	52	0	0	0	0	0	0	37	69	11	96	80	12	10	1	2	1	1	0	0		0	0	3	1	274	274	274	274	180	9	234	2	2	0	0	0	0	1	0	2	1	400	0	0	1	0
15942634	22682133	35889304	64	1	0	0	0	0	1	36	103	17	92	68	17	12	2	3	0	1	1	0	1	0	0	7	1	277	277	277	277	116	48	151	26	5	0	0	0	0	1	1	1	0	200	0	1	0	0
13860070	20769604	35897443	26	1	0	0	0	0	1	39	97	20	99	61	11	11	1	1	0	1	0	0		0	0	4	1	545	545	545	545	185	28	241	13	8	0	0	0	0	0	1	2	1	400	0	0	1	0
13029568	26768047	35907702	59	0	1	1	0	0	1	37	102	17	99	92	15	8	2	1	0	1	0	0		0	0	2	1	429	429	429	429	140	36	182	15	2	0	0	0	0	0	1	2	1	400	0	0	1	0
11009816	27645171	35911911	75	0	1	0	0	0	0	35	54	20	96	64	14	10	3	2	1	1	0	0		0	0	2	1	953	953	953	953	95	30	124	13	3	1	1	0	0	0	1	2	1	800	0	0	0	0
11266938	27078182	35918080	85	1	1	0	1	0	1	35	68	28	99	55	6	10	3	1	1	1	1	1	0	0	0	4	1	179	179	179	179	209	29	272	15	9	0	1	0	0	1	1	2	1	400	0	0	1	0
16631681	29083544	35919327	39	0	0	0	0	0	1	37	112	37	96	78	24	8	1	2	1	0	0	0		0	0	3	1	430	430	430	430	114	22	148	23	10	0	0	0	0	0	1	2	1	400	0	0	1	0
14798319	22042214	35928028	71	1	0	1	1	0	1	37	104	21	100	58	31	7	1	2	1	1	1	0	0	0	1	3	1	1870	3205	1870	2624	191	121	248	25	7	0	0	0	0	1	1	2	1	1800	0	0	0	0
10608703	25233292	35933844	55	1	0	0	0	0	1	36	84	37	97	84	12	10	7	2	0	1	0	0		0	0	5	1	289	289	289	289	168	22	218	36	9	0	0	0	0	0	1	1	0	200	0	1	0	0
17955642	27285616	35943179	70	0	1	1	1	1	1	37	116	17	100	121	12	7	5	1	0	0	1	1	0	0	1	4	1	1398	1398	1398	1398	173	29	225	35	11	0	0	0	0	1	1	2	1	1200	0	0	0	0
17079941	22427703	35947837	58	1	0	0	0	0	1	37	123	37	95	84	10	10	1	2	1	1	1	1	0	0	0	5	1	826	826	826	826	49	76	64	14	14	1	1	1	1	1	1	2	1	800	0	0	0	0
17356675	26183564	35951965	59	0	0	0	1	0	1	38	81	19	95	67	9	11	1	1	0	1	0	0		0	0	2	1	997	997	997	997	116	24	151	5	3	0	0	0	0	0	0	2	1	800	0	0	0	0
19505092	23365445	35957275	55	0	1	0	0	0	0	37	115	16	96	94	7	16	1	1	0	1	0	0		0	0	2	1	75	75	75	75	351	37	456	7	4	0	0	0	0	0	1	1	0	200	0	1	0	0
15566010	29597124	35958529	96	0	1	0	0	0	1	37	58	12	94	60	6	9	2	1	0	1	0	0		0	0	2	1	57	57	57	57	255	209	332	1	2	0	0	0	0	0	0	1	0	200	0	1	0	0
16517123	22415368	35961936	55	1	0	0	0	0	0	37	118	18	93	84	5	12	1	2	0	1	1	0	0	1	0	4	1	1141	1141	1141	1141	52	12	68	45	25	0	0	0	0	1	1	2	1	1000	0	0	0	0
15587205	26066129	35976206	92	1	0	0	0	0	1	36	84	14	99	61	17	7	1	1	0	1	0	0		0	0	2	1	835	835	835	835	145	57	189	5	2	0	0	0	0	0	1	2	1	800	0	0	0	0
12823483	24222474	35984644	70	1	0	0	0	0	1	37	93	20	98	62	40	8	2	1	1	0	0	0		0	0	7	1	1177	1177	1177	1177	101	8	131	14	3	1	1	0	0	1	1	2	1	1000	0	0	0	0
11567727	25216744	35990176	60	0	0	0	0	1	1	37	95	26	93	68	16	8	5	1	0	1	0	0		0	0	2	1	965	965	965	965	68	26	88	13	1	0	0	0	0	0	1	2	1	800	0	0	0	0
13848026	21165376	35990660	42	1	0	0	0	0	1	37	62	30	98	102	14	8	3	1	0	1	0	0		0	0	6	1	575	575	575	575	129	78	168	9	5	0	0	0	0	0	0	2	1	400	0	0	1	0
18968631	23034055	35993773	64	1	1	0	1	0	1	37	119	14	98	85	14	10	1	2	0	0	0	0		0	0	2	1	37	37	37	37	271	25	352	15	2	0	0	0	0	1	1	1	0	200	0	1	0	0
18718102	23858000	35994154	35	0	0	0	0	0	1	37	113	31	91	58	39	8	5	3	0	1	1	0	1	0	0	10	1	2659	2659	2659	2659	122	25	159	31	7	0	0	0	0	1	1	2	1	2000	0	0	0	0
15974615	21212325	35996163	86	0	0	1	0	1	1	37	65	28	95	63	19	9	3	2	1	1	0	0		0	0	2	1	55	55	55	55	177	22	230	13	4	0	0	0	0	1	1	1	0	200	0	1	0	0
14568429	22706161	36002686	71	0	1	0	1	0	0	37	140	17	96	88	9	16	2	2	0	1	0	0		0	0	5	1	15787	15787	2280	9034	277	224	360	40	23	0	1	0	0	0	1	2	1	2000	0	0	0	0
18445073	27258796	36008008	53	1	0	1	0	0	0	39	109	24	100	66	8	9	2	1	0	1	0	0		0	0	4	1	819	819	819	819	128	21	166	22	22	0	0	0	0	0	1	2	1	800	0	0	0	0
12074140	24387001	36013916	56	0	0	0	0	0	1	38	125	26	100	70	9	6	1	2	0	1	0	0		0	0	5	1	436	436	436	436	199	40	259	74	14	0	0	0	0	1	1	2	1	400	0	0	1	0
13792604	21265775	36018124	55	0	0	0	0	0	0	37	81	32	93	66	16	9	1	2	1	0	1	0	1	0	0	2	1	241	241	241	241	149	8	194	55	46	0	0	0	0	0	1	2	1	400	0	0	1	0
16276410	22398974	36024494	32	0	0	0	0	0	0	38	85	20	98	61	7	13	2	2	0	1	1	1	0	0	0	4	1	687	687	687	687	90	37	117	27	15	0	0	0	0	1	1	2	1	600	0	0	0	1
11541378	22900653	36024728	71	0	1	1	0	1	0	36	60	22	100	70	9	7	1	1	1	0	0	0		0	0	4	1	223	223	223	223	134	26	174	10	2	0	0	0	0	0	1	2	1	400	0	0	1	0
16857350	28080619	36030997	49	1	0	0	0	0	1	37	119	26	95	69	2	8	2	4	1	1	1	0	0	0	1	16	1	259	259	259	259	101	106	135	16	11	1	1	1	0	1	1	2	1	400	0	0	1	0
16900285	29087704	36032063	73	0	1	0	0	0	0	36	113	19	95	74	6	13	1	3	1	0	0	0		0	0	2	1	109	109	109	109	242	20	315	32	13	0	1	0	0	1	1	1	0	200	0	1	0	0
16108683	21607477	36038690	42	0	0	0	0	0	1	39	108	25	94	71	12	8	2	4	0	1	1	1	0	0	1	4	1	1986	1986	1986	1986	177	117	230	124	20	0	0	0	0	1	1	2	1	1800	0	0	0	0
12800814	29909244	36040375	67	1	0	0	0	0	1	38	82	15	96	77	19	12	0	2	1	0	1	1	1	0	0	6	1	1414	1414	1414	1414	155	59	204	29	24	0	0	0	0	0	1	2	1	1400	0	0	0	0
17239380	22412986	36043246	64	1	0	0	1	0	1	37	85	20	100	67	18	9	1	1	0	0	0	0		0	0	2	1	351	351	351	351	181	36	235	13	9	0	0	0	0	0	1	1	0	200	0	1	0	0
16227072	24617470	36043532	80	1	0	1	0	0	1	36	70	21	99	97	6	9	1	3	1	1	1	1	0	1	0	5	1	509	509	509	509	144	52	182	30	8	0	1	0	0	1	1	2	1	400	0	0	1	0
16929830	26573767	36052654	57	1	1	1	1	0	1	36	78	18	99	46	9	9	4	1	1	0	0	0		0	0	5	1	1460	1460	1460	1460	122	31	159	11	2	0	0	0	0	0	1	2	1	1400	0	0	0	0
19261055	27669986	36058123	56	0	0	0	0	1	1	36	89	18	100	77	15	9	3	1	1	1	1	0	1	0	0	2	1	4426	4426	2657	3542	142	43	185	44	32	0	0	0	0	0	1	2	1	2000	0	0	0	0
11532399	27285076	36059027	81	0	0	0	0	1	0	37	80	17	100	62	24	11	2	3	0	1	0	0		0	0	2	1	974	974	974	974	86	94	112	14	3	0	0	0	0	0	1	2	1	800	0	0	0	0
10029291	22205327	36059427	50	0	0	1	0	1	0	37	105	35	100	70	12	13	6	3	1	1	1	1	0	0	0	3	1	1560	1560	1560	1560	126	32	164	19	6	0	0	0	0	1	1	2	1	1400	0	0	0	0
17536222	26728411	36066456	45	0	1	0	0	0	1	37	96	18	96	75	17	14	1	3	0	0	1	1	0	1	0	2	1	762	4408	762	2585	93	23	105	63	61	0	1	1	1	1	1	2	1	600	0	0	0	1
18799312	23465137	36072067	79	0	0	0	0	1	1	37	96	20	98	86	25	9	4	3	1	1	0	0		0	0	6	1	585	585	585	585	162	76	211	23	3	0	0	0	0	0	1	2	1	400	0	0	1	0
18976063	27922201	36080226	35	0	0	1	0	0	0	37	126	21	95	59	15	10	1	3	1	1	1	1	0	0	0	7	1	23597	23597	23597	23597	198	272	257	18	10	0	0	0	0	0	1	2	1	2000	0	0	0	0
10770039	29572052	36082375	43	0	0	0	0	0	1	37	113	16	100	64	7	9	1	2	1	1	0	0		0	0	3	1	188	188	188	188	164	196	213	10	6	0	0	0	0	0	1	2	1	400	0	0	1	0
10846829	21447426	36085352	85	0	0	0	1	1	1	36	107	31	100	85	11	10	2	2	0	1	0	0		0	0	3	1	196	196	196	196	195	27	254	3	2	0	0	0	0	0	1	1	0	200	0	1	0	0
12041160	24775972	36092157	82	0	0	0	0	1	1	36	118	25	95	79	11	9	1	3	0	1	1	0	1	0	0	3	1	2973	2973	2973	2973	139	29	183	46	21	0	0	0	0	0	1	2	1	2000	0	0	0	0
17051865	20392650	36094197	73	1	0	0	0	0	1	36	76	18	100	105	37	8	2	3	0	0	1	0	1	1	0	2	1	2894	5774	2137	3249	118	60	157	18	16	1	1	1	1	0	1	2	1	2000	0	0	0	0
17349939	20829317	36095830	32	0	0	0	0	0	1	37	127	21	100	78	17	12	2	3	1	1	0	0		0	0	6	1	691	691	691	691	158	67	205	7	4	0	0	0	0	1	1	2	1	600	0	0	0	1
17505354	27931427	36096290	79	1	0	0	0	0	0	38	113	23	94	80	10	13	1	2	0	1	0	0		0	0	2	1	532	532	532	532	114	43	148	6	4	0	0	0	0	0	0	2	1	400	0	0	1	0
11230452	25832117	36097252	40	0	0	1	0	0	1	37	121	16	100	68	9	11	0	2	0	0	1	1	0	0	0	2	1	230	230	230	230	243	40	316	40	27	0	0	0	0	0	1	1	0	200	0	1	0	0
12452032	29507491	36103413	26	0	0	0	0	0	0	36	75	9	100	67	23	9	1	2	1	0	0	0		0	0	5	1	2924	2924	2843	2884	47	67	59	12	2	0	0	0	0	1	1	2	1	2000	0	0	0	0
10040025	27996267	36107367	69	0	1	1	1	1	1	37	78	16	96	56	15	10	2	3	1	0	1	0	0	0	1	4	1	382	382	382	382	105	56	137	12	7	1	1	0	0	0	1	2	1	400	0	0	1	0
17470891	23834823	36111497	67	0	1	0	0	0	1	37	80	16	100	59	18	8	0	1	0	1	1	1	0	0	0	5	1	44	44	44	44	201	24	261	36	16	0	0	0	0	1	1	1	0	200	0	1	0	0
17767787	29161597	36123529	58	0	1	1	0	1	1	37	74	11	97	67	7	8	4	3	0	0	1	0	0	0	1	8	1	678	678	678	678	195	47	254	37	5	0	0	0	0	0	1	2	1	600	0	0	0	1
14163849	28207667	36124473	84	0	1	0	1	0	0	37	60	27	92	72	22	12	2	3	0	1	0	0		0	0	3	1	823	823	823	823	258	24	335	6	3	0	0	0	0	0	0	2	1	800	0	0	0	0
11346699	27717369	36125779	38	0	1	0	0	0	0	37	63	20	97	72	7	15	1	2	0	1	0	0		0	0	4	1	308	308	308	308	176	17	229	19	14	0	0	0	0	0	1	1	0	200	0	1	0	0
15888164	25033292	36127039	84	1	0	0	0	0	0	36	97	19	96	67	22	13	1	1	0	0	0	0		0	0	4	1	1058	1058	1058	1058	97	14	126	6	6	1	1	1	1	1	1	2	1	1000	0	0	0	0
14532362	28738594	36127475	78	1	0	1	1	0	1	37	68	11	99	58	8	11	2	1	0	1	0	0		0	0	2	1	277	277	277	277	75	16	98	9	4	0	0	0	0	0	1	1	0	200	0	1	0	0
14477097	22714569	36129382	79	1	1	0	0	0	1	37	113	15	96	63	5	10	0	2	0	1	0	0		0	0	3	1	281	281	281	281	114	6	148	8	1	1	1	1	0	0	0	1	0	200	0	1	0	0
12039815	28018038	36131579	57	1	1	0	0	0	1	36	83	19	98	66	9	9	1	1	1	1	0	0		0	0	8	1	41	41	41	41	214	36	278	6	2	0	0	0	0	1	1	1	0	200	0	1	0	0
14111050	21702249	36139529	47	0	0	1	0	1	0	39	96	26	86	44	15	8	8	2	0	1	1	1	0	0	0	12	1	1664	1664	1664	1664	95	65	120	14	14	0	0	0	0	1	1	2	1	1600	0	0	0	0
14401866	27647030	36140662	66	1	0	0	0	0	1	37	112	24	93	84	28	7	1	2	0	0	1	1	0	0	0	3	1	562	562	562	562	111	33	144	50	8	0	0	0	0	0	1	2	1	400	0	0	1	0
10413870	21063081	36149963	70	0	0	0	0	1	1	37	109	17	100	57	36	8	3	2	1	1	0	0		0	0	4	1	7583	7583	7583	7583	115	57	153	13	3	1	1	1	1	1	1	2	1	2000	0	0	0	0
18866492	27481576	36156358	98	1	0	1	0	0	1	37	67	8	96	84	9	7	1	1	1	1	0	0		0	0	7	1	16	16	16	16	259	25	337	7	3	0	0	0	0	1	1	1	0	200	0	1	0	0
13904893	26423601	36157555	30	0	0	0	0	0	0	37	113	22	98	72	2	7	1	1	1	1	0	0		0	0	2	1	719	719	719	719	118	42	153	6	2	0	0	0	0	0	0	2	1	600	0	0	0	1
16920763	21735394	36165195	81	0	0	0	1	0	1	36	91	16	100	67	20	10	3	1	0	1	0	0		0	0	5	1	86	86	86	86	195	32	254	5	5	1	1	1	1	0	1	1	0	200	0	1	0	0
14266111	22090677	36170033	64	0	0	0	1	1	1	37	102	23	97	79	12	11	2	2	0	1	1	1	0	0	0	4	1	122	122	122	122	154	58	201	9	7	0	0	0	0	0	1	1	0	200	0	1	0	0
15338454	29642380	36175095	78	0	1	1	1	1	1	36	70	27	99	72	15	8	6	1	0	1	0	0		0	0	3	1	824	824	824	824	118	29	153	13	2	1	1	0	0	0	1	2	1	800	0	0	0	0
15442180	23822995	36175135	58	0	1	1	1	1	1	38	92	27	86	89	5	9	3	2	1	1	1	0	1	0	0	2	1	1308	1308	1308	1308	116	10	151	31	11	0	0	0	0	1	1	2	1	1200	0	0	0	0
10027704	24331106	36187473	42	0	0	0	0	0	1	38	89	20	97	78	8	13	1	1	0	1	0	0		0	0	2	1	12671	12671	12671	12671	186	172	242	8	3	0	0	0	0	0	0	2	1	2000	0	0	0	0
10639820	24237197	36192138	49	1	0	0	0	0	1	34	103	15	100	58	19	8	3	4	1	0	1	0	1	0	0	4	1	1422	1422	1422	1422	163	79	212	10	2	0	0	0	0	1	0	2	1	1400	0	0	0	0
15886180	28793934	36195775	23	0	0	0	0	0	0	36	65	13	99	81	6	9	1	2	0	0	0	0		0	0	2	1	226	226	226	226	166	21	216	7	2	0	0	0	0	0	0	1	0	200	0	1	0	0
13415550	25548368	36196913	43	0	1	0	1	0	1	37	91	18	100	72	15	8	2	3	1	1	1	0	1	0	0	7	1	225	225	127	176	230	32	134	26	7	0	0	0	0	1	1	2	1	400	0	0	1	0
17021161	26037283	36199067	74	0	1	1	1	1	1	36	80	20	97	69	21	12	8	4	1	1	1	0	0	0	1	7	1	14491	14491	14491	14491	66	61	86	8	7	1	1	1	1	1	1	2	1	2000	0	0	0	0
11053863	29679030	36218686	63	0	1	0	0	0	0	39	123	34	99	64	18	11	2	3	0	1	0	0		0	0	2	1	237	237	237	237	251	15	326	16	16	1	1	1	1	1	1	1	0	200	0	1	0	0
15530444	20483262	36220002	48	1	1	0	0	0	0	36	113	36	94	82	15	12	2	2	0	1	0	0		0	0	5	1	954	1344	954	1149	90	12	117	13	8	0	0	0	0	0	0	2	1	800	0	0	0	0
18135918	21534528	36224507	51	0	0	0	1	0	1	38	71	12	100	60	7	10	1	1	1	1	0	0		0	0	3	1	44	44	44	44	176	15	229	11	2	0	0	0	0	0	0	1	0	200	0	1	0	0
18616499	25438560	36230816	49	0	1	0	0	0	0	37	70	22	97	69	11	13	2	4	0	1	1	1	0	0	0	11	1	4752	4752	4752	4752	134	106	174	9	9	1	1	1	1	0	1	2	1	2000	0	0	0	0
11469107	22044535	36231940	56	0	0	0	0	0	1	37	106	34	97	60	10	10	1	1	1	1	1	0	1	0	0	3	1	301	301	301	301	109	24	142	32	14	0	0	0	0	0	1	2	1	400	0	0	1	0
16758327	22779550	36233830	60	0	0	0	0	0	0	34	90	26	91	75	3	13	2	2	1	1	0	0		0	0	7	1	11546	11546	11546	11546	107	128	139	2	2	1	1	1	1	1	1	2	1	2000	0	0	0	0
11488234	29146802	36237605	44	0	0	0	0	0	1	37	85	24	100	87	31	9	4	3	1	1	1	0	0	1	1	8	1	3195	3195	3195	3195	58	84	75	28	28	1	1	1	1	1	1	2	1	2000	0	0	0	0
12870544	26243235	36251980	24	0	0	0	0	0	0	38	98	22	100	76	27	9	1	2	0	1	1	1	0	0	1	3	1	9896	9896	9896	9896	145	71	189	23	16	0	0	0	0	0	1	2	1	2000	0	0	0	0
19715842	27465786	36252938	51	1	0	0	0	0	0	36	77	19	98	104	8	10	1	2	1	1	1	1	0	0	0	2	1	331	331	331	331	168	15	218	8	6	0	0	0	0	0	1	2	1	400	0	0	1	0
11211965	28944277	36253772	76	1	0	0	0	0	0	37	82	37	88	56	39	8	4	1	1	1	0	0		0	0	4	1	1767	1767	1767	1767	153	78	199	1	1	1	1	1	1	1	1	2	1	1600	0	0	0	0
11846410	26376985	36253818	68	0	0	0	0	0	1	36	82	25	93	71	3	11	1	1	0	1	0	0		0	0	2	1	24	24	24	24	326	30	424	3	1	0	0	0	0	0	0	0	0	0	1	0	0	0
10449408	22698294	36257805	56	0	0	0	0	0	0	36	89	10	100	49	15	7	3	2	1	1	1	0	0	0	1	5	1	499	499	499	499	162	195	211	57	20	0	0	0	0	1	1	2	1	400	0	0	1	0
12066823	20835384	36262734	82	0	0	0	0	0	1	36	67	18	99	44	11	9	4	2	1	1	0	0		0	0	4	1	630	630	630	630	107	51	139	6	4	0	0	0	0	0	1	2	1	600	0	0	0	1
13286912	25359629	36271811	67	0	0	1	0	0	1	35	94	25	100	71	6	9	2	2	0	1	1	0	1	0	0	5	1	138	138	138	138	111	33	144	26	26	0	0	0	0	1	1	1	0	200	0	1	0	0
14743145	26859980	36277337	70	0	0	0	0	1	1	38	95	18	100	104	6	9	2	2	0	1	0	0		0	0	3	1	387	437	387	412	99	25	129	11	6	0	0	0	0	0	1	1	0	200	0	1	0	0
13175168	22465441	36277748	62	0	1	1	1	0	1	36	92	20	100	76	4	8	4	2	0	1	0	0		0	0	7	1	249	249	249	249	273	46	355	79	12	0	0	0	0	0	1	1	0	200	0	1	0	0
15469139	22111017	36282126	80	1	0	0	0	0	1	36	91	18	100	84	6	8	0	1	1	0	1	1	1	0	1	6	1	203	226	203	215	132	28	170	62	10	0	0	0	0	1	1	2	1	400	0	0	1	0
11635995	23667167	36282564	86	0	1	0	0	1	1	38	102	25	97	86	12	8	2	1	1	1	0	0		0	0	2	1	299	299	299	299	186	29	242	22	2	1	1	1	0	0	1	2	1	400	0	0	1	0
10192651	24449860	36284462	30	0	0	0	0	0	0	34	101	25	96	48	8	7	2	3	1	1	1	0	1	0	0	4	1	4902	4902	4902	4902	54	82	70	1	1	1	1	1	1	1	1	2	1	2000	0	0	0	0
10969205	24346474	36288324	90	0	1	0	0	0	0	38	108	22	94	70	8	11	1	2	0	0	0	0		0	0	4	1	212	212	212	212	149	9	196	11	10	1	1	1	0	1	1	1	0	200	0	1	0	0
16711329	22489555	36297015	48	1	0	0	0	0	1	38	111	21	95	104	5	8	1	2	1	1	1	0	0	1	1	2	1	79	79	79	79	334	72	434	18	18	0	0	0	0	0	1	1	0	200	0	1	0	0
12697698	26742830	36297377	57	0	0	1	0	0	1	37	70	15	99	70	3	9	1	2	0	1	0	0		0	0	2	1	86	86	86	86	170	62	215	4	2	1	1	0	0	1	0	1	0	200	0	1	0	0
16756464	29745303	36304914	83	1	0	1	0	0	1	37	94	18	100	49	10	7	1	1	1	1	0	0		0	0	2	1	340	340	340	340	208	26	270	4	4	1	1	0	0	0	1	2	1	400	0	0	1	0
13433858	20218265	36307451	61	0	0	0	0	0	1	37	103	20	97	80	8	7	1	1	0	1	0	0		0	0	3	1	16	16	16	16	265	134	345	5	1	0	0	0	0	0	0	0	0	0	1	0	0	0
19481121	21165564	36317272	71	1	0	0	0	0	1	37	103	19	95	56	6	8	1	2	0	1	0	0		0	0	10	1	742	742	742	742	80	103	104	13	2	0	0	0	0	0	0	2	1	600	0	0	0	1
10339317	26032056	36320742	67	0	1	0	1	1	1	37	96	17	96	111	9	6	4	1	0	1	0	0		0	0	3	1	1688	1688	1688	1688	158	119	205	20	3	0	1	0	0	0	1	2	1	1600	0	0	0	0
18148239	22606590	36323093	20	0	0	0	0	0	0	37	124	23	98	98	16	10	2	3	1	1	1	0	0	0	1	7	1	12955	12955	11152	12054	143	239	186	1	3	1	1	1	1	1	1	2	1	2000	0	0	0	0
16148712	22742492	36332674	61	1	1	1	1	0	1	36	66	20	94	69	18	14	2	2	0	1	0	0		0	0	6	1	1001	1001	1001	1001	148	14	192	21	15	0	0	0	0	1	1	2	1	1000	0	0	0	0
14879136	29681392	36336596	45	0	1	1	1	1	1	37	88	12	97	79	21	13	1	2	0	1	0	0		0	0	2	1	289	289	289	289	223	61	290	13	2	0	0	0	0	0	1	1	0	200	0	1	0	0
14889442	25946000	36341822	39	0	0	0	0	0	0	38	96	29	96	66	10	13	1	2	1	1	0	0		0	0	3	1	2603	2603	2603	2603	208	146	270	5	3	0	0	0	0	0	0	2	1	2000	0	0	0	0
16598370	24146381	36343288	71	1	0	0	0	0	1	37	88	17	95	60	8	11	1	1	0	1	0	0		0	0	2	1	175	175	175	175	173	40	225	3	2	0	0	0	0	0	0	1	0	200	0	1	0	0
14430330	28771807	36347599	71	0	0	0	0	0	1	36	73	23	96	63	20	9	1	2	0	1	0	0		0	0	4	1	742	742	742	742	128	12	166	6	2	0	0	0	0	1	0	2	1	600	0	0	0	1
11075702	25178197	36349400	49	1	0	0	0	0	0	38	59	20	100	74	11	13	1	2	0	1	0	0		0	0	3	1	855	855	855	855	174	42	226	5	4	0	0	0	0	1	0	2	1	800	0	0	0	0
17165725	29460006	36350237	60	0	0	1	0	1	1	37	101	19	95	79	23	12	8	2	0	1	1	1	0	1	1	4	1	547	547	547	547	121	63	157	47	46	0	0	0	0	0	1	2	1	400	0	0	1	0
17417573	24710404	36358936	47	1	0	1	0	0	1	38	128	22	97	69	12	13	3	3	0	0	1	1	1	1	0	3	1	1981	1981	1981	1981	85	35	111	50	50	0	1	1	1	1	1	2	1	1800	0	0	0	0
15936435	20588642	36364051	45	0	1	0	0	0	0	37	62	22	95	83	13	14	1	1	1	1	1	1	0	0	0	3	1	624	624	240	432	185	67	243	32	32	0	0	0	0	0	1	2	1	600	0	0	0	1
14838237	24951721	36365860	41	0	0	0	0	0	1	37	112	16	100	57	6	11	0	3	1	1	1	1	0	0	0	3	1	882	882	882	882	96	24	125	42	12	0	0	0	0	1	1	2	1	800	0	0	0	0
10652536	24696812	36369973	54	1	1	0	1	0	1	38	75	22	99	77	16	9	1	2	1	1	0	0		0	0	2	1	884	884	660	772	154	9	200	12	7	0	0	0	0	0	1	2	1	800	0	0	0	0
17449831	26258657	36374005	86	0	0	1	1	0	1	37	96	37	95	67	21	11	2	3	0	1	0	0		0	0	4	1	193	193	193	193	182	12	237	12	12	1	1	0	0	1	0	1	0	200	0	1	0	0
13475463	24016129	36375397	75	0	0	0	0	1	1	38	114	28	90	49	26	8	1	1	1	1	1	1	0	0	0	2	1	408	408	408	408	144	42	189	15	14	1	1	1	1	0	1	2	1	400	0	0	1	0
15092026	25335690	36377617	30	0	0	0	0	0	1	37	85	17	98	87	10	9	1	1	0	1	0	0		0	0	4	1	927	927	927	927	170	214	221	4	1	0	0	0	0	0	0	2	1	800	0	0	0	0
14703629	24343246	36385585	43	0	0	1	0	0	1	37	113	15	100	101	6	7	4	1	1	1	0	0		0	0	3	1	265	265	265	265	118	35	153	5	2	0	0	0	0	0	0	2	1	400	0	0	1	0
11944882	20673408	36397270	83	0	1	0	1	1	1	37	86	16	99	69	10	8	2	1	0	1	0	0		0	0	4	1	1836	1836	1836	1836	186	40	242	8	6	0	0	0	0	1	1	2	1	1800	0	0	0	0
10321613	29807103	36398180	75	0	1	1	1	1	1	37	68	14	95	65	8	8	3	1	0	1	0	0		0	0	6	1	152	171	152	162	215	84	270	26	8	0	0	0	0	0	1	1	0	200	0	1	0	0
19240349	23820397	36402602	75	0	0	1	0	0	1	37	60	18	99	79	10	9	1	1	1	1	0	0		0	0	2	1	74	74	74	74	259	120	337	3	2	0	0	0	0	0	0	1	0	200	0	1	0	0
10187935	29968077	36408512	74	0	1	1	1	1	1	34	67	22	98	102	7	6	3	1	0	1	0	0		0	0	3	1	590	590	590	590	121	46	157	23	6	0	1	0	0	1	1	2	1	400	0	0	1	0
17197713	20644454	36408968	38	1	1	1	0	0	1	39	110	31	95	86	8	10	2	2	0	1	0	0		0	0	3	1	1379	1379	1379	1379	150	19	195	21	17	0	0	0	0	0	1	2	1	1200	0	0	0	0
15608980	29888406	36414275	65	1	1	1	0	0	0	37	111	32	100	65	9	11	1	1	0	1	0	0		0	0	2	1	87	87	82	85	213	19	287	4	3	0	0	0	0	0	1	1	0	200	0	1	0	0
13929271	29398563	36417534	52	0	0	0	0	0	0	37	84	14	91	77	16	11	0	2	1	1	0	0		0	0	2	1	939	939	939	939	114	12	148	25	25	1	1	1	1	0	1	2	1	800	0	0	0	0
12130785	23878621	36423135	80	1	1	0	0	0	1	39	128	23	100	61	16	10	4	1	0	1	1	0	1	0	0	2	1	290	290	290	290	138	39	179	7	7	0	1	0	0	0	1	1	0	200	0	1	0	0
15082011	29444107	36423313	59	0	0	0	0	0	1	35	83	17	98	69	6	11	1	2	1	1	0	0		0	0	4	1	2326	2326	2326	2326	155	23	202	10	3	0	0	0	0	1	0	2	1	2000	0	0	0	0
11165060	29991539	36423523	70	1	1	1	1	0	1	39	112	21	100	62	10	10	4	2	0	1	1	1	0	0	1	4	1	576	576	576	576	224	14	291	25	23	0	0	0	0	1	1	2	1	400	0	0	1	0
17790156	26303618	36427675	66	1	1	0	0	0	0	37	82	18	100	70	11	11	1	2	1	1	1	1	1	0	0	5	1	289	289	289	289	258	53	335	14	14	1	1	1	1	0	1	2	1	400	0	0	1	0
15365495	27290636	36428665	65	1	0	1	0	0	1	37	91	18	95	75	7	8	1	2	0	1	0	0		0	0	3	1	506	506	506	506	140	22	182	3	1	0	0	0	0	1	1	2	1	400	0	0	1	0
12590117	25059932	36429336	62	0	1	0	1	0	0	38	120	18	100	82	10	9	1	2	0	1	1	0	1	0	0	8	1	1183	1183	1162	1173	152	50	201	15	13	0	0	0	0	0	1	2	1	1000	0	0	0	0
10234596	26179011	36436111	59	0	1	1	1	1	1	37	82	18	100	75	9	7	7	1	1	1	0	0		0	0	9	1	1619	1619	1619	1619	197	58	256	23	3	0	0	0	0	1	1	2	1	1600	0	0	0	0
11815589	25170947	36438264	54	0	1	0	0	0	0	37	98	18	98	79	8	10	1	2	0	0	1	0	0	0	1	3	1	1138	1138	1138	1138	123	18	160	45	25	0	0	0	0	0	1	2	1	1000	0	0	0	0
13075661	21033238	36439730	70	0	0	1	0	1	1	37	104	26	94	61	1	6	2	1	0	1	0	0		0	0	6	1	2176	2176	2176	2176	146	51	184	28	3	0	0	0	0	0	0	2	1	2000	0	0	0	0
19739872	23023377	36444478	81	0	0	0	0	1	1	36	95	17	96	69	13	11	2	2	1	1	0	0		0	0	6	1	1867	1867	1867	1867	169	167	220	8	5	0	0	0	0	1	0	2	1	1800	0	0	0	0
13601656	22784735	36447499	64	0	0	0	0	1	1	37	88	14	95	98	16	11	4	4	0	1	0	0		0	0	8	1	520	520	520	520	128	84	169	18	1	1	1	1	0	0	1	2	1	400	0	0	1	0
10989303	23123107	36447790	50	0	0	0	0	0	1	36	106	17	92	79	27	9	2	3	1	1	0	0		0	0	12	1	1195	1195	1195	1195	52	73	68	24	13	0	1	0	0	1	1	2	1	1000	0	0	0	0
15316284	23048758	36450908	76	0	1	0	1	1	0	37	109	23	95	91	26	12	3	3	0	0	1	1	0	0	0	5	1	286	286	286	286	160	34	208	30	14	0	1	1	0	1	1	1	0	200	0	1	0	0
11570626	28214602	36452432	79	1	0	0	0	0	1	38	108	11	100	67	6	11	1	3	1	1	1	0	0	0	1	5	1	254	254	254	254	224	49	291	25	15	0	0	0	0	0	1	2	1	400	0	0	1	0
13576465	27747527	36460532	85	1	0	0	0	0	1	37	78	21	95	70	18	11	4	1	0	1	0	0		0	0	5	1	343	343	343	343	142	24	185	5	1	0	0	0	0	0	0	1	0	200	0	1	0	0
11474021	21946612	36467616	46	0	0	1	0	0	0	38	86	16	99	62	23	15	1	1	0	1	0	0		0	0	4	1	523	523	523	523	235	23	306	23	22	0	0	0	0	0	1	2	1	400	0	0	1	0
15220757	22503751	36469158	32	1	0	0	0	0	1	37	100	18	99	95	14	12	2	2	0	1	0	0		0	0	3	1	27943	28414	27943	28179	170	279	221	14	7	0	0	0	0	1	1	2	1	2000	0	0	0	0
12134903	20058274	36470424	74	0	0	0	0	1	1	36	75	13	100	83	5	6	8	1	0	1	1	0	1	0	0	4	1	436	436	436	436	103	64	134	9	3	0	0	0	0	0	1	2	1	400	0	0	1	0
13867315	25814158	36470669	82	0	0	1	0	0	1	36	134	19	98	71	11	10	2	2	1	1	0	0		0	0	4	1	192	192	192	192	153	30	199	1	1	1	1	1	1	0	1	2	1	400	0	0	1	0
18470672	25833892	36470971	62	1	0	0	0	0	0	37	115	23	89	54	24	11	1	1	0	0	0	0		0	0	6	1	209	501	209	355	98	30	127	29	7	0	1	0	0	1	1	1	0	200	0	1	0	0
10767970	21987545	36472818	63	0	1	0	0	1	0	37	127	16	100	85	12	13	3	1	0	1	1	1	0	0	0	12	1	16409	16409	16409	16409	103	90	134	25	14	0	0	0	0	1	1	2	1	2000	0	0	0	0
19932572	24050017	36478551	57	0	0	0	0	0	1	37	107	24	95	61	12	11	1	2	1	0	0	0		0	0	3	1	549	549	549	549	104	9	135	6	2	0	0	0	0	1	0	2	1	400	0	0	1	0
12602264	28818453	36479787	88	0	1	0	0	0	1	37	93	23	95	75	13	8	1	1	1	1	1	0	1	0	0	2	1	24	24	24	24	162	18	211	12	1	0	0	0	0	0	1	1	0	200	0	1	0	0
17401630	24789979	36482348	51	0	0	0	0	0	1	37	79	12	97	88	11	11	1	2	1	1	0	0		0	0	3	1	355	355	355	355	161	19	209	8	5	0	0	0	0	0	1	2	1	400	0	0	1	0
14682921	24067321	36484030	80	1	1	0	0	0	0	37	94	26	95	80	21	10	1	1	0	1	1	1	0	0	0	2	1	606	606	606	606	158	14	205	13	13	1	1	1	1	0	1	2	1	600	0	0	0	1
12474788	28896097	36484535	72	0	0	0	0	0	1	34	81	26	100	76	11	11	3	3	0	1	0	0		0	0	4	1	372	372	372	372	48	33	62	3	3	1	1	1	1	1	1	1	0	200	0	1	0	0
15154432	28951059	36485437	54	1	0	0	0	0	1	39	124	19	99	61	1	8	1	2	1	1	0	0		0	0	3	1	690	690	690	690	71	20	92	44	38	0	0	0	0	1	1	2	1	600	0	0	0	1
13881858	20577880	36489979	53	0	0	0	0	0	1	38	101	26	100	60	11	8	1	1	1	0	0	0		0	0	2	1	1572	1572	1572	1572	202	77	263	13	13	1	1	1	1	1	1	2	1	1400	0	0	0	0
19466866	21973884	36494208	61	0	0	1	0	0	0	37	92	19	98	91	7	11	0	2	0	1	0	0		0	0	2	1	2702	2702	2702	2702	122	37	159	7	3	0	0	0	0	0	0	2	1	2000	0	0	0	0
19213219	25383132	36494622	69	0	1	0	0	1	1	37	67	25	98	59	6	10	1	1	1	1	0	0		0	0	2	1	215	281	215	248	182	216	265	4	2	0	0	0	0	0	1	2	1	400	0	0	1	0
12707214	22872927	36495971	87	0	0	0	0	1	1	36	88	18	98	74	40	9	1	3	1	1	1	1	0	0	0	3	1	438	438	438	438	138	48	182	17	15	1	1	0	0	1	1	2	1	400	0	0	1	0
16184287	24240915	36498736	83	0	0	0	0	0	0	37	140	15	98	63	5	10	1	1	0	1	0	0		0	0	3	1	5912	5912	5912	5912	108	18	140	11	4	0	0	0	0	0	1	2	1	2000	0	0	0	0
13383310	22082594	36504335	76	1	0	1	0	0	1	39	140	24	98	62	1	13	1	3	0	1	1	0	1	0	0	2	1	482	482	482	482	179	78	233	25	15	0	0	0	0	1	1	2	1	400	0	0	1	0
12350194	21644247	36511354	53	0	0	1	0	1	0	36	72	23	97	76	4	8	3	3	0	1	0	0		0	0	7	1	1743	1743	1743	1743	109	125	142	6	2	1	1	1	0	0	0	2	1	1600	0	0	0	0
11336838	27736973	36513679	72	1	0	1	0	0	1	37	92	17	97	75	8	7	2	2	1	1	0	0		0	0	3	1	95	95	95	95	105	25	137	9	2	0	0	0	0	0	0	1	0	200	0	1	0	0
19560543	23167457	36515876	63	0	1	0	0	0	1	36	127	32	99	103	21	10	3	2	1	0	0	0		0	0	2	1	885	885	885	885	135	43	176	22	3	0	0	0	0	0	1	2	1	800	0	0	0	0
12811865	29448967	36522851	41	0	0	0	0	0	1	37	110	18	100	69	9	9	1	1	0	1	0	0		0	0	4	1	258	258	258	258	139	139	181	8	2	0	0	0	0	0	0	1	0	200	0	1	0	0
15973689	27404481	36523970	53	0	0	0	0	0	0	37	84	17	100	85	8	8	1	1	0	1	1	1	0	0	0	3	1	1324	1324	1324	1324	118	19	153	10	9	0	0	0	0	0	1	2	1	1200	0	0	0	0
10315300	24561473	36537793	27	1	0	1	0	0	1	38	110	17	98	103	18	10	1	2	0	1	0	0		0	0	4	1	568	568	568	568	131	42	170	6	5	0	0	0	0	0	0	2	1	400	0	0	1	0
18911483	27165016	36541272	67	1	0	1	0	0	1	37	87	18	94	89	7	10	1	1	0	0	0	0		0	0	5	1	1020	1020	1020	1020	166	80	216	25	17	0	0	0	0	0	1	2	1	1000	0	0	0	0
15160595	26519515	36544336	64	1	0	1	0	0	0	37	84	21	98	80	4	7	1	4	0	0	0	0		0	0	2	1	1019	1019	484	752	42	27	81	21	5	1	1	1	0	0	1	2	1	1000	0	0	0	0
12019898	28261248	36550047	88	0	1	0	1	0	1	36	71	22	100	80	9	7	1	1	0	1	0	0		0	0	3	1	150	150	150	150	170	26	223	9	5	0	0	0	0	1	1	1	0	200	0	1	0	0
13878385	24748460	36550328	83	0	1	1	1	0	1	37	98	18	89	72	4	11	2	1	1	1	1	0	0	0	0	3	1	128	128	128	128	248	37	322	16	3	0	0	0	0	1	1	1	0	200	0	1	0	0
17707835	22634512	36551592	66	0	0	0	1	0	0	37	115	17	99	75	11	10	1	2	0	1	0	0		0	0	3	1	174	174	174	174	127	51	167	1	4	1	1	1	1	1	0	1	0	200	0	1	0	0
19858494	21290537	36555100	70	0	0	0	0	0	0	38	117	18	95	52	7	11	3	1	0	1	1	1	0	1	1	7	1	1944	2860	864	1910	63	23	111	54	37	0	0	0	0	1	1	2	1	1800	0	0	0	0
17150899	29648276	36558687	65	0	1	1	0	0	1	36	50	23	95	65	23	12	2	2	0	1	0	0		0	0	4	1	224	224	224	224	170	39	221	21	4	0	0	0	0	0	1	1	0	200	0	1	0	0
11984647	25146721	36560987	52	1	1	0	1	0	0	37	127	18	93	72	22	12	1	3	0	1	0	0		0	0	3	1	743	743	743	743	159	19	207	51	39	0	0	0	0	1	1	2	1	600	0	0	0	1
12402348	25416130	36570472	66	1	0	0	0	0	1	37	72	13	100	75	16	7	2	3	1	1	1	1	1	0	0	5	1	1296	1296	1296	1296	147	72	193	24	24	1	1	0	0	0	1	2	1	1200	0	0	0	0
17016980	23230933	36571388	55	0	0	0	0	0	1	39	120	32	96	81	40	8	1	2	0	1	0	0		0	0	5	1	23522	23522	23522	23522	71	91	92	7	2	1	1	1	0	0	0	2	1	2000	0	0	0	0
13927020	21290478	36571787	71	0	1	1	1	1	1	36	71	25	98	82	10	10	4	1	0	1	0	0		0	0	3	1	380	380	380	380	134	17	174	11	8	0	0	0	0	0	1	1	0	200	0	1	0	0
11599567	27749125	36572137	68	0	0	1	1	1	1	37	95	16	100	85	17	10	2	3	1	1	1	0	0	1	0	3	1	860	1451	860	1156	62	29	81	34	21	0	1	0	0	1	1	2	1	800	0	0	0	0
12029365	21286969	36574062	76	0	1	1	1	1	1	37	66	23	97	71	10	11	2	3	0	1	0	0		0	0	2	1	13608	13608	13608	13608	199	252	259	5	5	1	1	1	1	1	1	2	1	2000	0	0	0	0
16002903	28925885	36580069	79	1	0	0	1	0	0	37	88	19	99	86	7	9	1	2	1	0	0	0		0	0	2	1	1217	1217	1217	1217	92	62	120	12	3	0	0	0	0	0	0	2	1	1200	0	0	0	0
15612556	26476632	36580700	49	0	1	0	0	0	1	38	71	16	99	91	7	8	1	1	1	1	0	0		0	0	2	1	126	126	126	126	196	56	257	7	4	0	0	0	0	1	1	1	0	200	0	1	0	0
14291446	26834208	36582479	63	1	0	0	0	0	1	36	89	30	100	45	3	13	1	4	1	1	0	0		0	0	5	1	671	671	671	671	141	9	185	99	23	0	0	0	0	1	1	2	1	600	0	0	0	1
17304365	29744920	36586148	88	0	1	0	0	0	0	37	128	20	100	114	13	12	1	2	0	1	0	0		0	0	3	1	253	253	253	253	91	50	118	11	8	1	1	0	0	0	1	1	0	200	0	1	0	0
11269805	20609051	36588942	41	0	0	1	0	0	1	37	102	16	100	76	12	7	1	1	1	1	1	0	1	0	1	2	1	724	724	724	724	114	60	148	14	5	0	0	0	0	0	1	2	1	600	0	0	0	1
17787379	27157657	36589054	61	0	0	0	0	0	1	37	84	25	95	66	16	10	1	1	1	1	0	0		0	0	5	1	1770	1770	1770	1770	107	18	139	21	9	0	0	0	0	0	1	2	1	1600	0	0	0	0
11164525	23048719	36595312	67	0	0	0	0	0	1	37	49	13	93	70	3	6	1	1	1	1	0	0		0	0	5	1	16	16	16	16	292	94	380	10	7	0	0	0	0	1	1	1	0	200	0	1	0	0
18112520	28405903	36596812	78	0	0	0	0	1	1	37	102	19	95	68	14	10	1	1	0	0	0	0		0	0	4	1	1886	1886	1886	1886	119	22	155	24	7	1	1	0	0	1	1	2	1	1800	0	0	0	0
15213253	20384962	36597046	58	1	1	1	0	0	1	37	74	25	93	71	8	10	1	1	1	1	1	0	1	0	0	3	1	256	256	256	256	211	15	274	15	6	0	0	0	0	0	1	2	1	400	0	0	1	0
10441335	25373904	36603744	65	0	1	0	0	0	1	36	140	37	91	79	15	9	1	3	0	1	0	0		0	0	7	1	33859	33859	33281	33859	88	183	114	1	1	1	1	1	1	1	1	2	1	2000	0	0	0	0
18121479	26043104	36612322	88	1	0	0	1	0	1	37	56	20	99	60	9	8	1	2	0	1	0	0		0	0	5	1	279	279	279	279	130	34	169	5	2	0	1	0	0	0	1	1	0	200	0	1	0	0
10034553	26774222	36618406	75	1	1	0	1	0	0	36	100	27	94	76	9	12	1	1	1	1	0	0		0	0	3	1	74	74	74	74	261	254	339	5	2	0	0	0	0	0	0	1	0	200	0	1	0	0
19812722	28845899	36618594	59	1	0	0	0	0	0	37	68	20	95	85	11	16	1	1	1	1	0	0		0	0	4	1	61	61	61	61	242	136	315	6	6	0	0	0	0	0	1	1	0	200	0	1	0	0
11368237	29535634	36622295	28	0	0	0	0	1	1	38	125	37	86	48	1	10	3	4	1	1	0	0		0	0	2	1	1269	1269	1007	1138	103	106	138	1	1	1	1	1	1	1	1	2	1	1200	0	0	0	0
18786038	20525934	36623299	86	0	0	0	1	1	0	38	103	27	100	61	12	9	2	2	0	0	1	1	0	0	1	2	1	442	442	442	442	140	26	182	15	10	1	1	1	1	1	1	2	1	400	0	0	1	0
14603493	28858647	36628619	48	0	0	1	0	0	1	37	74	22	100	56	17	10	5	2	0	1	1	1	1	0	0	2	1	439	439	439	439	92	26	120	25	25	0	1	0	0	1	1	2	1	400	0	0	1	0
18216937	23513577	36635946	91	0	1	0	0	0	1	37	109	33	97	83	5	8	1	2	0	1	0	0		0	0	5	1	3517	3517	3517	3517	107	38	139	11	2	0	0	0	0	0	1	2	1	2000	0	0	0	0
18358138	28786556	36640493	25	0	0	0	0	1	1	37	89	17	100	118	4	7	8	1	1	1	0	0		0	0	5	1	254	254	254	254	149	31	194	6	4	0	0	0	0	0	1	2	1	400	0	0	1	0
16511964	27262053	36640556	56	0	0	0	0	0	1	36	59	12	97	70	3	8	1	1	0	1	0	0		0	0	3	1	452	452	452	452	135	33	176	2	1	0	0	0	0	0	0	2	1	400	0	0	1	0
12211122	29033990	36646301	66	0	0	0	0	1	0	37	109	28	97	76	5	10	2	1	0	1	0	0		0	0	2	1	31	31	31	31	212	21	276	15	4	0	0	0	0	0	1	1	0	200	0	1	0	0
17076899	28981342	36650037	29	0	0	0	0	0	1	36	96	24	95	79	18	12	2	2	0	1	0	0		0	0	6	1	1328	1328	1328	1328	52	71	68	13	1	0	1	0	0	0	0	2	1	1200	0	0	0	0
11711020	22050846	36657275	71	1	1	0	0	0	0	39	104	30	96	81	26	6	2	1	0	0	0	0		0	0	6	1	5306	5306	5306	5306	100	117	130	50	6	0	0	0	0	0	1	2	1	2000	0	0	0	0
11041035	28271767	36657308	67	1	0	1	0	0	0	36	114	16	100	103	2	9	1	4	0	0	0	0		0	0	7	1	3270	3270	3270	3270	160	36	208	12	4	0	0	0	0	1	1	2	1	2000	0	0	0	0
12333937	20833385	36662757	56	1	0	0	0	0	1	37	104	17	100	71	7	9	1	1	0	1	0	0		0	0	2	1	27	27	27	27	297	76	386	7	2	0	0	0	0	0	1	0	0	0	1	0	0	0
13012527	29015692	36666948	66	1	0	0	0	0	1	37	73	11	97	50	7	9	1	1	1	1	0	0		0	0	2	1	114	114	114	114	192	39	250	11	6	0	0	0	0	0	1	1	0	200	0	1	0	0
18063505	26370885	36669182	59	0	0	0	0	0	0	37	84	23	96	121	14	12	1	2	0	1	0	0		0	0	3	1	801	801	801	801	154	27	200	17	11	0	1	0	0	0	1	2	1	800	0	0	0	0
19440664	27406546	36672405	59	0	0	1	0	1	1	37	74	12	97	57	8	12	5	1	0	1	1	0	0	0	1	4	1	381	893	381	637	95	15	153	19	16	0	0	0	0	1	1	1	0	200	0	1	0	0
19800412	23914523	36675003	70	1	0	1	0	0	0	37	80	31	90	71	1	8	1	3	1	1	0	0		0	0	3	1	3023	3023	3023	3023	127	68	161	1	1	1	1	1	1	1	1	2	1	2000	0	0	0	0
11785856	27788930	36676486	54	1	0	0	0	0	1	37	98	22	99	73	32	8	2	2	0	0	0	0		0	0	4	1	298	298	283	291	191	68	248	6	2	0	0	0	0	0	1	1	0	200	0	1	0	0
10769624	25499783	36683041	50	0	0	0	0	0	1	36	90	15	100	57	13	9	1	3	1	1	0	0		0	0	3	1	441	441	441	441	117	127	152	19	12	0	0	0	0	1	1	2	1	400	0	0	1	0
13141357	22415664	36684797	51	0	0	1	0	0	1	37	107	16	94	101	6	11	1	1	0	1	1	0	0	0	1	4	1	1371	1371	1371	1371	161	176	209	5	1	0	0	0	0	0	0	2	1	1200	0	0	0	0
16465056	23900843	36686040	50	0	0	1	0	0	1	38	130	17	95	79	7	9	1	1	0	1	0	0		0	0	2	1	788	788	788	788	92	11	120	17	3	0	0	0	0	0	0	2	1	600	0	0	0	1
14558952	24554033	36689422	55	0	0	0	0	0	0	38	74	20	100	100	5	12	1	1	1	1	0	0		0	0	2	1	96	96	96	96	220	49	286	13	9	0	0	0	0	0	1	1	0	200	0	1	0	0
16099220	21108651	36691371	47	1	0	1	0	0	0	39	134	32	96	63	11	14	3	4	0	1	1	1	0	0	0	5	1	719	719	719	719	147	138	191	12	9	0	0	0	0	1	1	2	1	600	0	0	0	1
13412164	24325350	36693170	47	1	0	0	0	0	0	38	82	26	93	86	12	15	2	1	0	1	1	0	1	0	1	9	1	857	857	857	857	218	34	283	55	35	0	1	0	0	1	1	2	1	800	0	0	0	0
15501368	28791201	36693752	33	0	0	0	0	0	1	37	78	25	94	70	13	7	1	1	0	1	0	0		0	0	2	1	572	572	572	572	121	15	157	16	2	0	0	0	0	0	0	2	1	400	0	0	1	0
19901974	25242108	36698889	39	0	0	0	0	0	0	37	86	15	90	54	16	9	1	2	1	1	0	0		0	0	7	1	113	113	113	113	78	50	101	6	2	0	0	0	0	0	1	1	0	200	0	1	0	0
16346066	24298360	36705326	81	0	1	1	0	0	1	36	109	26	97	44	7	8	0	2	1	1	0	0		0	0	2	1	632	632	632	632	132	5	172	11	11	0	0	0	0	1	1	2	1	600	0	0	0	1
16914073	28403863	36706796	90	0	1	0	0	1	1	36	92	27	95	69	7	9	2	1	0	1	1	0	0	0	0	3	1	4722	4722	4722	4722	138	79	179	9	9	1	1	1	1	0	1	2	1	2000	0	0	0	0
16264276	28233646	36711417	64	0	1	1	0	0	1	37	82	32	90	62	21	11	2	2	0	1	1	1	0	0	1	14	1	1551	1551	1551	1551	108	21	140	84	41	0	0	0	0	1	1	2	1	1400	0	0	0	0
14643554	28137438	36715386	53	1	0	0	0	0	0	39	97	18	100	84	11	9	1	2	1	1	0	0		0	0	4	1	417	417	417	417	222	44	289	35	21	0	0	0	0	0	1	2	1	400	0	0	1	0
18081790	22632793	36722125	36	0	0	0	0	0	1	39	116	12	100	44	15	9	1	1	1	0	0	0		0	0	2	1	142	142	142	142	111	20	144	14	3	0	0	0	0	0	0	1	0	200	0	1	0	0
16746141	20985633	36726850	49	0	0	0	0	0	1	37	83	22	99	95	6	16	0	2	0	0	0	0		0	0	6	1	25765	25765	25765	25765	104	203	135	18	4	0	0	0	0	0	1	2	1	2000	0	0	0	0
17714455	21824959	36730275	63	1	0	0	0	0	1	37	109	24	93	79	8	10	2	1	0	1	0	0		0	0	5	1	409	409	409	409	175	10	228	5	2	0	0	0	0	0	0	2	1	400	0	0	1	0
17248642	26454627	36740005	55	1	0	0	0	0	1	39	89	27	96	80	7	7	1	1	0	1	0	0		0	0	2	1	657	657	657	657	134	59	174	33	24	1	1	1	1	0	1	2	1	600	0	0	0	1
15626824	29650086	36741332	73	0	0	1	1	1	1	36	92	14	100	70	8	9	2	1	0	1	0	0		0	0	3	1	376	376	376	376	264	77	343	6	1	0	1	0	0	0	0	1	0	200	0	1	0	0
18196126	22916352	36751420	28	0	0	0	0	0	1	37	83	20	97	77	25	9	1	1	0	0	0	0		0	0	3	1	236	236	236	236	147	52	191	15	12	0	0	0	0	0	1	1	0	200	0	1	0	0
14709778	24592634	36752482	65	1	0	0	0	0	0	37	122	28	94	68	20	10	2	3	0	0	0	0		0	0	2	1	3085	3085	3085	3085	93	82	121	100	16	0	0	0	0	1	1	2	1	2000	0	0	0	0
10779064	21119294	36755903	48	0	1	0	1	0	1	37	98	18	100	64	9	10	1	2	0	0	0	0		0	0	4	1	425	425	425	425	190	16	247	18	5	0	0	0	0	1	1	2	1	400	0	0	1	0
19340496	21433458	36764861	59	0	1	0	0	0	1	36	73	12	93	69	14	9	4	1	0	1	0	0		0	0	3	1	4160	4160	3188	3616	134	58	178	22	22	1	1	1	1	1	1	2	1	2000	0	0	0	0
11128013	22129205	36766215	72	1	0	0	1	0	1	36	77	21	100	47	13	8	1	3	1	1	1	0	1	0	0	3	1	9662	9662	9662	9662	115	29	150	19	9	0	1	0	0	1	1	2	1	2000	0	0	0	0
11842879	29617617	36766337	21	0	0	0	0	0	1	37	116	8	100	90	15	8	0	2	1	1	1	0	0	0	1	2	1	313	313	313	313	101	17	131	16	2	1	1	1	0	0	1	2	1	400	0	0	1	0
17284977	28941015	36767563	87	1	0	0	0	0	0	37	67	22	95	88	6	8	1	1	1	0	0	0		0	0	4	1	574	574	574	574	168	92	218	7	1	0	1	0	0	0	0	2	1	400	0	0	1	0
18603093	26280776	36773190	36	0	0	1	0	0	1	36	94	25	100	92	11	8	1	2	0	1	0	0		0	0	3	1	499	499	499	499	99	7	129	11	5	0	0	0	0	1	1	2	1	400	0	0	1	0
13077822	24711627	36775233	67	0	0	0	0	0	1	36	134	21	96	70	15	9	1	1	1	1	0	0		0	0	4	1	4621	4621	4621	4621	62	27	81	5	2	0	0	0	0	0	0	2	1	2000	0	0	0	0
13869899	20935702	36780485	69	0	0	1	1	1	1	37	84	20	99	67	23	10	2	1	0	1	0	0		0	0	3	1	203	203	203	203	116	112	151	17	4	0	1	0	0	0	1	1	0	200	0	1	0	0
15191472	21529173	36781724	39	0	0	1	0	0	1	38	98	18	95	84	9	10	1	2	0	1	0	0		0	0	2	1	197	197	197	197	145	61	189	4	2	0	0	0	0	0	0	1	0	200	0	1	0	0
10916264	21525506	36789073	78	0	0	1	0	1	0	36	105	25	93	77	7	10	2	2	1	1	1	0	1	1	0	5	1	988	988	988	988	73	76	95	15	2	0	0	0	0	0	1	2	1	800	0	0	0	0
14974839	25280843	36792240	46	0	0	0	0	0	1	36	79	18	98	78	9	12	1	2	1	1	0	0		0	0	2	1	21	21	21	21	251	66	326	2	1	0	0	0	0	0	0	1	0	200	0	1	0	0
12687785	23570766	36799287	65	1	0	0	0	0	1	36	62	18	100	73	8	10	1	3	0	0	0	0		0	0	4	1	400	400	400	400	166	17	216	13	2	0	0	0	0	0	1	1	0	400	0	0	1	0
13050394	21694310	36805048	72	1	0	0	0	0	0	38	100	19	95	108	15	11	1	1	0	1	1	1	1	0	0	2	1	171	171	171	171	190	12	247	13	13	0	0	0	0	0	1	1	0	200	0	1	0	0
13464432	24700540	36808033	80	0	0	0	0	0	0	37	50	10	97	70	6	13	2	2	0	1	1	0	0	0	0	2	1	218	218	218	218	75	35	98	11	2	1	1	0	0	0	1	1	0	200	0	1	0	0
15131736	28942100	36819312	63	1	1	1	1	0	0	37	49	14	100	95	7	10	1	2	1	1	0	0		0	0	3	1	413	413	413	413	175	61	228	12	4	0	0	0	0	0	1	2	1	400	0	0	1	0
17819251	28659937	36819435	75	0	1	1	0	1	1	37	111	17	97	84	8	9	2	1	0	1	0	0		0	0	3	1	170	170	170	170	175	53	228	9	3	0	0	0	0	0	0	1	0	200	0	1	0	0
15767173	21864083	36820158	82	1	0	1	1	0	0	37	49	19	97	72	8	13	2	2	0	1	0	0		0	0	3	1	183	183	183	183	279	42	363	4	4	0	0	0	0	1	1	1	0	200	0	1	0	0
15479539	28494482	36821979	28	0	1	1	0	1	1	39	116	28	90	86	12	12	2	2	0	1	1	1	1	0	0	3	1	1571	1571	720	1063	186	36	242	68	67	0	0	0	0	1	1	2	1	1400	0	0	0	0
17584316	29174378	36823505	63	1	0	0	0	0	1	37	135	27	91	85	15	11	1	2	1	1	1	0	0	0	0	4	1	499	499	499	499	84	6	109	8	3	0	0	0	0	1	1	2	1	400	0	0	1	0
17152272	28684469	36824639	86	1	0	0	0	0	0	38	79	20	97	88	6	11	1	2	0	1	1	1	0	0	0	2	1	121	121	121	121	154	57	200	11	10	1	1	1	0	0	1	1	0	200	0	1	0	0
17849496	28926199	36829404	86	0	1	1	1	1	0	38	61	25	99	98	8	12	2	3	0	1	0	0		0	0	3	1	230	230	230	230	194	12	252	21	6	0	0	0	0	1	1	1	0	200	0	1	0	0
11988783	22593223	36830062	62	0	0	0	0	0	1	37	86	15	97	88	13	10	2	1	0	0	0	0		0	0	8	1	1799	2330	1105	1562	192	98	250	14	8	0	0	0	0	0	1	2	1	1600	0	0	0	0
16941107	23689276	36833225	78	0	1	1	1	1	1	37	92	18	99	89	15	10	1	1	1	1	0	0		0	0	2	1	102	102	102	102	188	46	244	23	10	0	0	0	0	1	1	1	0	200	0	1	0	0
16921794	25509358	36838455	68	0	1	1	1	1	0	35	66	18	96	67	32	15	1	3	0	1	0	0		0	0	2	1	216	216	216	216	196	44	255	16	16	1	1	1	1	1	1	1	0	200	0	1	0	0
17635650	23299826	36839275	62	1	1	1	0	0	1	37	68	14	100	79	6	10	1	1	0	1	0	0		0	0	4	1	44	44	44	44	300	40	390	4	2	0	0	0	0	0	0	1	0	200	0	1	0	0
13777013	26645554	36844889	68	0	0	0	0	0	1	38	100	15	99	71	22	9	1	4	1	1	1	1	0	0	0	3	1	28	28	28	28	309	124	402	25	12	0	0	0	0	0	1	1	0	200	0	1	0	0
16393035	20466294	36856015	54	1	0	0	1	0	1	39	99	30	99	72	11	8	1	2	1	1	0	0		0	0	2	1	722	722	722	722	95	11	124	47	6	0	0	0	0	0	0	2	1	600	0	0	0	1
11953725	24705116	36865388	91	1	1	1	0	0	1	36	123	29	95	88	15	11	1	4	0	1	0	0		0	0	3	1	267	267	267	267	224	33	291	6	6	1	1	0	0	0	1	1	0	200	0	1	0	0
10776490	24961844	36865861	71	0	0	0	1	1	1	39	89	18	99	87	5	12	2	2	1	1	0	0		0	0	6	1	1681	15435	1448	4762	86	38	112	26	17	0	0	0	0	0	1	2	1	1600	0	0	0	0
14916659	21268310	36866171	92	1	0	0	0	0	1	36	78	20	99	52	24	8	1	1	1	1	0	0		0	0	2	1	361	361	361	361	71	23	92	8	3	1	1	0	0	0	1	2	1	400	0	0	1	0
10674024	24846770	36873998	41	0	0	0	0	0	0	39	95	22	100	63	11	7	1	1	1	1	0	0		0	0	2	1	83	83	83	83	194	7	252	4	2	0	0	0	0	0	0	1	0	200	0	1	0	0
19178619	22731414	36879940	69	0	0	0	0	0	1	37	75	15	98	72	15	7	1	2	0	0	0	0		0	0	2	1	376	376	376	376	149	12	194	5	1	0	0	0	0	0	0	1	0	200	0	1	0	0
15158531	29613613	36881400	69	0	0	1	0	1	0	37	83	22	95	71	15	10	3	2	1	1	1	1	0	1	1	4	1	117	117	111	114	144	11	195	40	41	0	1	1	1	1	1	1	0	200	0	1	0	0
10768342	28213986	36885586	78	1	0	0	0	0	1	37	116	27	94	67	11	10	2	3	1	1	0	0		0	0	4	1	42	42	42	42	147	5	191	4	2	0	0	0	0	1	1	1	0	200	0	1	0	0
10350488	28817955	36891438	84	1	1	1	0	0	1	37	82	18	99	51	17	11	1	1	1	1	0	0		0	0	2	1	293	293	293	293	170	55	221	19	6	0	0	0	0	0	1	2	1	400	0	0	1	0
12556199	27384848	36899827	70	0	0	0	0	0	0	37	140	36	91	95	7	14	1	2	0	1	1	0	0	0	0	2	1	2981	2981	2981	2981	151	60	197	10	6	0	0	0	0	0	1	2	1	2000	0	0	0	0
19182116	24064435	36901112	70	0	0	1	0	1	1	37	80	13	100	63	16	11	2	2	1	1	0	0		0	0	8	1	202	202	202	202	151	50	196	3	3	1	1	0	0	1	0	2	1	400	0	0	1	0
18997702	26522960	36906066	69	0	0	0	0	0	1	37	76	15	98	115	14	10	1	1	1	1	0	0		0	0	2	1	42	42	42	42	283	37	368	8	2	0	0	0	0	0	1	1	0	200	0	1	0	0
17420681	22965733	36906761	55	0	0	0	0	0	1	36	64	22	99	66	4	11	1	1	0	1	0	0		0	0	2	1	689	689	689	689	156	11	203	7	1	0	0	0	0	0	0	2	1	600	0	0	0	1
18006408	23806886	36909078	58	1	0	0	0	0	1	37	88	20	95	110	12	13	1	1	1	0	1	1	0	0	0	4	1	418	418	418	418	122	36	159	21	21	0	0	0	0	0	1	2	1	400	0	0	1	0
18753961	29545525	36912959	66	0	0	0	0	0	1	38	86	15	94	82	9	7	1	2	1	1	0	0		0	0	3	1	23	23	23	23	363	113	472	6	2	0	0	0	0	0	0	1	0	200	0	1	0	0
18319731	25673612	36917234	54	1	1	1	0	0	1	36	89	26	91	72	8	11	2	1	0	1	1	0	0	1	0	2	1	79	429	79	254	245	23	203	45	45	0	1	0	0	0	1	1	0	200	0	1	0	0
18569207	25371912	36919456	38	0	0	0	0	0	0	37	91	23	100	75	11	9	1	2	0	1	0	0		0	0	7	1	11512	11512	11512	11512	97	101	126	10	10	1	1	1	1	0	1	2	1	2000	0	0	0	0
11744921	20157596	36921463	73	0	1	1	1	0	0	36	95	22	99	69	16	10	1	3	1	1	0	0		0	0	3	1	122	122	122	122	127	22	165	8	8	1	1	1	0	1	1	1	0	200	0	1	0	0
12661994	24971579	36931305	47	1	1	1	0	0	0	37	92	30	95	100	23	16	2	3	0	1	0	0		0	0	9	1	614	614	614	614	128	56	164	16	16	1	1	1	1	1	1	2	1	600	0	0	0	1
14409048	23842385	36931310	83	0	1	1	0	1	0	36	126	20	93	86	9	12	2	2	0	1	0	0		0	0	3	1	129	129	129	129	195	18	254	3	1	0	0	0	0	0	1	1	0	200	0	1	0	0
10356341	27114971	36933920	64	0	1	0	1	0	1	37	109	34	93	100	2	8	1	3	0	1	0	0		0	0	3	1	36963	41860	33281	35657	101	223	131	4	4	1	1	1	1	1	1	2	1	2000	0	0	0	0
19548130	28138629	36934231	80	0	1	1	0	1	1	37	111	28	95	85	13	7	4	2	1	1	0	0		0	0	3	1	312	544	312	428	145	66	189	8	5	0	1	0	0	0	1	2	1	400	0	0	1	0
15695567	26771867	36959500	78	1	1	1	1	0	1	36	88	18	96	66	11	9	2	3	0	0	0	0		0	0	9	1	170	170	170	170	158	49	205	8	2	0	0	0	0	1	1	1	0	200	0	1	0	0
18828209	22671828	36960229	53	0	0	0	0	0	0	36	98	12	95	66	7	13	1	1	0	1	0	0		0	0	2	1	31	31	31	31	151	46	197	4	1	0	0	0	0	0	0	1	0	200	0	1	0	0
12388358	25326700	36961133	80	1	1	1	1	0	1	37	88	16	99	79	7	8	1	1	1	1	1	0	0	0	1	2	1	164	164	164	164	185	27	241	14	5	0	0	0	0	0	1	2	1	400	0	0	1	0
10321933	29792275	36968438	61	1	0	0	0	0	1	37	86	16	100	66	9	10	1	1	1	1	1	0	1	0	0	2	1	593	593	593	593	128	33	166	23	15	0	0	0	0	0	0	2	1	400	0	0	1	0
10309969	23107749	36977059	68	0	0	0	0	0	0	37	117	30	89	98	20	12	1	1	1	1	0	0		0	0	2	1	1148	1566	1148	1357	97	14	126	27	25	0	0	0	0	0	1	2	1	1000	0	0	0	0
16467390	24253092	36978490	79	0	0	0	0	1	1	37	113	20	94	74	9	12	4	4	1	1	0	0		0	0	16	1	3139	3139	3139	3139	98	121	127	5	5	1	1	1	1	1	1	2	1	2000	0	0	0	0
11858497	24644178	36980734	62	0	1	0	1	0	1	38	91	21	99	74	17	7	1	2	1	1	1	1	0	1	0	2	1	597	597	597	597	145	39	189	22	16	0	0	0	0	0	1	2	1	400	0	0	1	0
18562632	23585178	36986225	84	0	1	0	0	1	1	38	76	14	99	54	29	8	2	1	1	1	1	1	0	0	0	5	1	577	577	577	577	128	9	166	16	13	0	0	0	0	1	1	2	1	400	0	0	1	0
13674258	22581014	36994628	60	1	0	0	0	0	1	37	109	16	97	55	2	11	1	2	1	1	0	0		0	0	2	1	19	19	19	19	191	25	248	10	3	0	0	0	0	0	1	1	0	200	0	1	0	0
18174687	22350899	37010916	81	0	0	0	0	0	1	38	82	19	93	66	12	8	1	2	1	1	1	0	1	0	0	3	1	74	74	40	57	255	36	359	24	16	1	1	0	0	0	1	1	0	200	0	1	0	0
14343345	26194118	37013313	81	1	0	0	1	0	1	36	103	27	100	71	39	13	1	2	1	1	0	0		0	0	3	1	391	391	391	391	84	8	109	20	15	0	0	0	0	0	1	2	1	400	0	0	1	0
14521707	21657866	37020990	39	0	0	0	0	0	1	38	109	15	98	102	15	11	1	2	1	1	1	1	1	0	0	2	1	39	39	39	39	183	16	238	28	28	0	0	0	0	0	1	1	0	200	0	1	0	0
13839166	23924328	37022112	70	1	0	0	0	0	0	38	109	34	97	81	6	11	1	4	1	1	1	1	1	1	0	2	1	1139	1821	1139	1480	175	17	228	145	21	0	0	0	0	0	1	2	1	1000	0	0	0	0
18029627	27486642	37026266	54	0	0	0	0	0	0	38	98	8	96	71	6	10	1	1	0	0	0	0		0	0	2	1	1264	1264	1264	1264	113	82	147	25	19	0	0	0	0	0	1	2	1	1200	0	0	0	0
10115812	20091897	37028700	71	1	0	0	0	0	1	37	78	18	97	53	6	8	4	1	1	1	0	0		0	0	3	1	96	96	96	96	169	27	220	7	3	0	0	0	0	0	0	1	0	200	0	1	0	0
19381076	21099487	37029444	35	0	0	0	0	0	1	36	113	37	95	86	8	8	1	2	1	1	0	0		0	0	3	1	1754	1754	1591	1673	77	17	100	17	11	0	0	0	0	0	1	2	1	1600	0	0	0	0
15740156	24613637	37032873	80	1	1	1	0	0	0	37	59	23	100	58	11	10	1	1	0	1	0	0		0	0	3	1	185	185	185	185	168	21	218	9	5	0	0	0	0	0	1	1	0	200	0	1	0	0
13436671	25323722	37039302	82	1	0	0	0	0	1	38	97	24	98	78	10	10	1	1	0	1	0	0		0	0	2	1	137	137	137	137	154	12	200	7	1	0	0	0	0	0	0	1	0	200	0	1	0	0
18060047	20492311	37051054	93	0	1	0	1	1	0	36	87	17	94	76	13	10	1	1	1	1	0	0		0	0	2	1	136	136	136	136	148	43	192	9	8	0	0	0	0	0	1	1	0	200	0	1	0	0
12838416	26834703	37054128	70	1	0	0	0	0	1	36	68	29	96	72	7	10	1	2	1	1	1	1	0	0	0	2	1	2463	2463	2463	2463	114	19	148	14	14	1	1	1	1	0	1	2	1	2000	0	0	0	0
12891444	27637354	37058571	53	1	0	1	0	0	1	39	113	20	98	53	6	8	1	1	1	1	1	0	0	0	1	2	1	219	219	219	219	112	7	146	6	1	0	0	0	0	0	0	2	1	400	0	0	1	0
13681438	24548459	37064397	64	1	0	0	0	0	0	36	96	14	98	66	6	10	4	4	1	1	1	1	1	0	0	5	1	22552	22552	22552	22552	139	101	184	12	12	1	1	1	1	0	1	2	1	2000	0	0	0	0
14689295	29094569	37065188	86	0	1	1	0	1	1	37	96	20	88	49	14	11	2	4	1	0	1	0	1	0	1	5	1	396	396	396	396	155	47	199	20	18	0	0	0	0	1	1	2	1	400	0	0	1	0
19674514	23108851	37065773	80	0	0	1	1	0	1	36	106	23	86	96	13	9	1	1	0	1	1	0	1	0	0	2	1	1338	1338	1338	1338	101	61	131	30	4	0	0	0	0	0	1	2	1	1200	0	0	0	0
10119872	22318477	37065927	78	0	1	1	0	1	1	36	85	20	95	64	5	8	4	1	1	1	0	0		0	0	7	1	129	129	129	129	122	20	159	4	4	1	1	0	0	1	0	1	0	200	0	1	0	0
14816494	20079585	37074505	26	0	0	0	0	0	0	36	138	26	97	77	10	12	4	3	1	1	1	0	1	1	0	6	1	899	899	899	899	163	31	212	93	79	0	0	0	0	0	1	2	1	800	0	0	0	0
19674376	21192280	37081250	83	0	1	0	0	1	1	37	76	21	100	69	8	8	2	2	0	1	1	1	0	0	0	7	1	616	616	616	616	143	39	186	14	15	1	1	1	1	0	1	2	1	600	0	0	0	1
14628729	27070123	37082640	60	1	0	1	0	0	0	37	95	23	91	96	9	12	1	1	0	1	0	0		0	0	2	1	1146	1146	1146	1146	142	47	185	40	25	0	0	0	0	0	1	2	1	1000	0	0	0	0
18132013	23086340	37086726	56	0	0	0	0	1	0	37	90	19	98	92	18	10	1	1	1	0	1	0	1	0	0	2	1	342	342	342	342	164	55	215	18	13	0	0	0	0	0	1	2	1	400	0	0	1	0
11804278	25818525	37087219	74	0	1	0	0	1	1	37	69	18	93	82	16	11	2	1	1	0	1	1	0	0	0	3	1	198	198	198	198	126	13	164	14	7	0	0	0	0	0	1	2	1	400	0	0	1	0
13313907	28672917	37092980	53	0	0	0	0	1	1	37	55	14	100	77	9	7	1	1	0	1	0	0		0	0	2	1	16	16	16	16	249	11	324	6	2	0	1	0	0	0	1	0	0	0	1	0	0	0
17679525	25745243	37093744	60	0	0	0	0	0	0	36	80	14	95	75	4	9	0	1	0	1	0	0		0	0	4	1	164	164	164	164	230	262	299	14	2	0	1	0	0	0	1	1	0	200	0	1	0	0
15784583	25740922	37102127	59	0	1	0	1	1	0	39	78	15	99	75	11	9	2	1	0	1	0	0		0	0	2	1	680	680	680	680	141	20	183	13	5	0	0	0	0	0	1	2	1	600	0	0	0	1
18526154	29207123	37103897	65	0	0	0	0	0	1	37	87	19	97	59	3	8	1	1	0	1	0	0		0	0	4	1	762	762	762	762	113	11	147	6	1	0	0	0	0	1	0	2	1	600	0	0	0	1
11518807	26371796	37109418	37	0	0	0	0	0	1	39	116	25	98	74	40	6	3	2	0	1	0	0		0	0	3	1	1697	1697	1697	1697	142	140	186	30	3	0	0	0	0	0	0	2	1	1600	0	0	0	0
18853538	24103112	37122690	78	1	0	0	0	0	1	36	83	15	100	69	15	9	1	2	0	1	1	1	0	0	0	2	1	634	634	634	634	153	46	199	29	16	0	1	0	0	0	1	2	1	600	0	0	0	1
14130228	23503338	37128231	80	1	0	1	1	0	1	37	90	17	97	75	9	9	1	2	0	1	0	0		0	0	9	1	1134	1134	1134	1134	55	78	72	6	1	1	1	1	1	1	1	2	1	1000	0	0	0	0
11828541	24005493	37132087	56	0	0	0	1	1	1	36	86	22	97	89	17	9	2	1	0	1	0	0		0	0	2	1	1128	1128	1128	1128	113	38	147	11	11	1	1	1	1	0	1	2	1	1000	0	0	0	0
14245777	21486808	37137715	73	1	0	0	0	0	1	36	63	20	100	55	26	8	1	2	1	0	0	0		0	0	2	1	266	266	266	266	144	24	187	8	5	0	0	0	0	0	1	2	1	400	0	0	1	0
13697731	28113079	37151963	21	0	1	0	0	0	0	38	112	20	100	65	6	13	1	3	0	1	1	1	1	0	1	2	1	955	3885	831	1318	99	32	130	78	78	0	1	1	1	0	1	2	1	800	0	0	0	0
12396999	29521559	37156445	46	0	0	0	0	0	1	37	105	22	99	68	11	7	1	2	1	1	1	1	0	0	0	3	1	146	146	146	146	63	34	82	13	8	0	0	0	0	1	0	1	0	200	0	1	0	0
18478557	26890377	37164465	64	0	0	1	0	0	0	36	82	19	92	56	4	8	3	2	1	1	1	0	1	0	1	9	1	244	244	244	244	87	74	113	72	4	0	1	0	0	1	1	2	1	400	0	0	1	0
14369272	29177747	37167709	54	0	0	0	0	0	0	37	113	18	100	62	25	8	1	2	0	1	0	0		0	0	9	1	841	841	841	841	153	89	199	2	2	1	1	1	1	0	1	2	1	800	0	0	0	0
11178069	28499612	37173753	69	1	0	1	0	0	0	37	65	14	98	77	4	7	2	1	1	1	0	0		0	0	3	1	134	134	134	134	143	15	186	3	3	0	0	0	0	1	1	1	0	200	0	1	0	0
17751474	24541143	37175699	62	1	0	0	0	0	1	38	98	28	97	63	27	9	2	2	0	1	0	0		0	0	4	1	18386	18386	18386	18386	76	117	99	3	3	1	1	1	1	1	1	2	1	2000	0	0	0	0
15934342	22223362	37178284	62	0	0	0	0	0	0	37	87	24	96	73	1	9	0	1	1	1	0	0		0	0	3	1	3096	3096	3096	3096	164	51	215	4	2	0	0	0	0	0	0	2	1	2000	0	0	0	0
11741591	24843776	37178815	91	1	0	0	0	0	1	36	125	23	97	72	20	15	2	4	1	0	1	0	1	0	0	2	1	657	657	657	657	70	59	91	10	9	1	1	1	0	1	1	2	1	600	0	0	0	1
19682215	23832857	37184120	83	1	0	0	0	0	0	36	89	28	100	75	15	11	1	3	1	1	0	0		0	0	2	1	245	245	245	245	57	71	74	6	7	1	1	1	1	0	1	2	1	400	0	0	1	0
16967171	29835251	37185043	76	0	1	1	0	1	1	37	67	15	100	67	7	7	1	1	1	1	0	0		0	0	2	1	47	47	47	47	218	20	283	4	3	0	0	0	0	0	1	1	0	200	0	1	0	0
13036533	28397314	37187494	60	0	0	0	0	1	1	36	84	25	94	85	17	10	3	1	0	0	1	1	0	0	0	5	1	741	741	741	741	90	35	117	62	62	0	0	0	0	0	1	2	1	600	0	0	0	1
17120667	23560082	37193723	71	0	0	0	0	0	1	37	73	14	100	64	4	6	1	1	0	0	0	0		0	0	8	1	1167	1167	1167	1167	88	11	114	15	2	0	1	0	0	1	1	2	1	1000	0	0	0	0
17660935	28044220	37195725	25	1	0	0	0	0	1	37	124	32	98	83	15	15	5	4	0	0	0	0		0	0	7	1	12155	41860	12155	35657	142	366	185	27	11	0	0	0	0	0	1	2	1	2000	0	0	0	0
11103376	28135062	37196072	86	1	1	1	1	0	1	37	95	33	100	93	6	8	1	1	1	1	0	0		0	0	2	1	60	60	60	60	249	53	324	6	3	0	0	0	0	0	1	1	0	200	0	1	0	0
11406804	20558360	37197600	82	0	1	0	1	1	1	37	82	20	98	75	20	10	1	2	1	1	0	0		0	0	11	1	835	835	835	835	181	53	235	17	15	0	0	0	0	1	1	2	1	800	0	0	0	0
18595172	20456015	37198099	91	1	0	1	1	0	0	37	81	26	100	64	6	9	1	2	1	1	0	0		0	0	2	1	259	259	259	259	137	18	178	3	1	0	0	0	0	0	0	2	1	400	0	0	1	0
15628450	24818483	37200340	82	1	0	0	0	0	0	37	87	18	95	75	15	9	1	1	0	1	0	0		0	0	3	1	616	616	616	616	103	17	134	1	1	0	0	0	0	0	0	2	1	600	0	0	0	1
13189443	21578415	37200543	46	0	0	0	0	0	0	36	111	17	100	68	25	10	1	2	1	1	0	0		0	0	3	1	348	348	348	348	132	49	172	8	4	0	0	0	0	0	1	2	1	400	0	0	1	0
15854896	23802854	37222847	73	0	1	1	1	1	1	36	86	19	96	88	9	14	2	3	0	1	0	0		0	0	6	1	558	558	558	558	162	83	208	3	3	1	1	1	1	0	1	2	1	400	0	0	1	0
15746911	20798842	37223558	81	0	1	1	1	1	1	36	128	32	97	75	8	9	5	2	0	0	0	0		0	0	4	1	629	629	629	629	220	123	286	4	1	0	0	0	0	0	1	2	1	600	0	0	0	1
18508354	25573201	37225327	68	1	1	0	0	0	0	36	62	14	100	72	14	11	1	1	1	1	0	0		0	0	3	1	91	91	91	91	118	29	153	6	1	0	0	0	0	0	0	1	0	200	0	1	0	0
10617255	21586668	37228716	64	0	0	0	0	0	1	37	77	15	92	69	7	8	1	2	0	1	0	0		0	0	2	1	16	16	16	16	295	23	384	3	1	0	0	0	0	0	0	0	0	0	1	0	0	0
19541392	20386972	37249768	89	0	1	0	1	1	1	35	80	14	97	57	6	9	1	2	0	0	1	1	0	0	0	3	1	806	806	806	806	98	24	127	23	21	0	0	0	0	1	1	2	1	800	0	0	0	0
19042662	28440124	37249777	64	0	0	0	0	0	0	38	91	15	100	66	15	8	1	1	0	1	1	0	0	1	0	4	1	126	126	126	126	103	14	134	22	17	0	1	0	0	1	1	1	0	200	0	1	0	0
13780815	28782703	37253408	70	0	0	1	0	0	1	37	110	26	96	60	9	6	1	2	1	1	0	0		0	0	2	1	760	760	760	760	102	11	133	6	3	0	0	0	0	0	1	2	1	600	0	0	0	1
15961605	22824292	37253474	72	1	0	0	0	0	0	37	88	26	100	69	13	10	1	2	1	1	0	0		0	0	5	1	2856	2856	2856	2856	113	22	147	13	2	0	0	0	0	1	1	2	1	2000	0	0	0	0
15869266	22997025	37254399	55	1	0	0	0	0	1	37	83	22	96	63	8	8	1	2	0	1	0	0		0	0	3	1	1451	1451	1451	1451	156	40	203	7	2	0	0	0	0	0	0	2	1	1400	0	0	0	0
13505755	22752582	37257840	63	0	1	0	0	0	0	37	93	31	100	61	2	7	1	3	1	1	1	1	0	0	0	5	1	557	557	557	557	107	136	139	56	18	0	1	1	0	1	1	2	1	400	0	0	1	0
10064049	26336999	37262930	71	1	1	0	0	0	1	37	140	31	96	90	40	8	1	2	0	1	0	0		0	0	3	1	282	282	282	282	198	33	257	16	1	0	0	0	0	0	1	1	0	200	0	1	0	0
18777918	24753501	37270064	19	0	0	0	0	0	1	37	118	21	96	75	13	8	1	2	1	1	0	0		0	0	2	1	21918	41860	6563	18058	121	83	157	38	38	0	1	1	1	1	1	2	1	2000	0	0	0	0
11038738	27970260	37276399	22	1	0	0	0	0	1	37	100	19	99	81	14	10	1	1	1	1	0	0		0	0	4	1	141	141	141	141	160	30	208	10	6	0	0	0	0	0	1	1	0	200	0	1	0	0
13050816	22634251	37280139	64	1	0	0	0	0	0	37	55	12	96	84	5	9	1	1	0	1	0	0		0	0	5	1	42	42	42	42	244	163	317	3	2	0	0	0	0	1	0	1	0	200	0	1	0	0
11390058	27321750	37294629	70	0	0	0	1	0	1	37	102	27	97	88	5	7	1	1	0	1	1	1	0	0	1	6	1	872	872	872	872	109	58	142	76	35	0	0	0	0	1	1	2	1	800	0	0	0	0
12982141	20421526	37294778	62	1	0	0	0	0	1	37	61	25	99	74	18	8	2	1	1	1	1	1	0	0	0	2	1	2148	2148	2148	2148	135	58	176	32	31	0	0	0	0	1	1	2	1	2000	0	0	0	0
11747211	28279569	37301764	74	0	0	0	0	0	1	37	112	25	94	70	13	9	0	1	1	1	1	0	1	0	0	2	1	189	189	189	189	153	9	199	25	7	0	0	0	0	0	0	2	1	400	0	0	1	0
10457824	25280974	37305179	81	0	1	0	0	0	1	37	94	21	95	83	17	9	1	1	0	0	1	1	0	0	0	3	1	2195	2195	2195	2195	117	16	152	11	4	0	0	0	0	0	0	2	1	2000	0	0	0	0
10236326	22813114	37307878	69	0	1	0	1	1	0	37	87	18	94	70	15	9	2	2	0	1	1	0	1	0	0	6	1	729	729	729	729	190	19	247	35	35	0	0	0	0	1	1	2	1	600	0	0	0	1
16544239	24596629	37317679	48	1	1	0	1	0	0	37	69	35	96	62	8	11	3	1	0	1	0	0		0	0	3	1	473	473	473	473	122	49	159	28	2	0	1	0	0	0	1	2	1	400	0	0	1	0
10297927	26820709	37318339	92	0	0	0	0	1	1	36	54	20	98	46	21	11	1	1	1	1	0	0		0	0	2	1	359	359	359	359	101	42	131	12	5	1	1	0	0	0	0	2	1	400	0	0	1	0
13256226	21659935	37319976	50	0	1	1	0	1	0	39	96	12	98	70	17	13	1	3	0	1	1	1	1	1	0	2	1	189	189	189	189	177	76	226	35	34	0	1	1	1	0	1	1	0	200	0	1	0	0
12088626	27998706	37320089	47	0	0	0	0	0	1	37	84	16	100	73	6	8	0	3	0	1	0	0		0	0	6	1	3602	3602	3602	3602	162	97	212	41	2	0	0	0	0	0	1	2	1	2000	0	0	0	0
12298967	27632581	37321998	56	0	1	1	1	1	1	36	59	16	99	72	5	10	2	1	0	1	0	0		0	0	2	1	702	702	702	702	191	50	243	3	1	0	0	0	0	0	0	2	1	600	0	0	0	1
18827351	25462705	37322739	75	1	0	0	0	0	0	37	81	26	99	63	11	12	1	1	1	1	1	0	1	0	0	3	1	292	292	292	292	188	42	244	19	6	0	0	0	0	0	0	2	1	400	0	0	1	0
12115511	26249248	37330100	32	0	0	1	0	0	0	37	78	19	93	84	6	8	0	2	0	1	1	1	0	0	0	6	1	481	481	481	481	170	68	215	12	2	0	0	0	0	0	0	2	1	400	0	0	1	0
17683350	22441696	37334388	51	0	0	0	0	1	1	37	122	25	86	75	27	9	3	2	1	1	0	0		0	0	2	1	2316	2316	2316	2316	134	53	176	13	5	0	0	0	0	1	1	2	1	2000	0	0	0	0
17213193	25637335	37340813	37	0	0	0	0	0	1	37	68	15	96	63	8	7	1	1	1	1	0	0		0	0	3	1	16	16	16	16	248	24	322	2	1	0	0	0	0	0	0	1	0	200	0	1	0	0
14139649	28669544	37348855	63	0	0	0	0	0	1	38	100	24	96	90	13	11	1	1	0	0	0	0		0	0	3	1	2424	2424	2424	2424	173	27	225	14	3	1	1	0	0	0	1	2	1	2000	0	0	0	0
16367560	25071325	37352025	91	0	1	0	0	0	1	37	81	20	100	56	12	8	1	1	1	1	0	0		0	0	3	1	182	182	182	182	184	20	239	9	5	1	1	1	0	0	0	2	1	400	0	0	1	0
16938605	21991737	37356325	46	0	1	0	0	0	1	37	91	25	95	44	7	9	1	3	0	1	1	1	0	1	0	13	1	338	338	338	338	101	48	131	37	14	0	0	0	0	1	1	1	0	200	0	1	0	0
16562319	21769803	37356629	70	1	0	1	1	0	0	36	93	16	98	66	11	10	1	3	0	0	1	0	0	0	1	5	1	1724	1724	1724	1724	132	37	172	28	3	0	1	0	0	0	1	2	1	1600	0	0	0	0
13474571	20602067	37356963	78	1	0	0	1	0	1	36	76	18	97	81	6	8	1	1	0	1	0	0		0	0	3	1	207	207	207	207	156	33	203	5	1	0	1	0	0	0	0	1	0	200	0	1	0	0
17715294	28399871	37357219	71	1	0	1	0	0	1	37	87	26	96	65	17	9	2	4	0	1	0	0		0	0	17	1	1374	1374	1374	1374	120	162	156	12	13	1	1	1	1	1	1	2	1	1200	0	0	0	0
11399688	24987547	37364190	76	0	1	0	1	0	0	39	100	18	100	54	16	9	4	3	0	1	0	0		0	0	5	1	520	520	520	520	93	14	121	7	3	1	1	1	1	0	1	2	1	400	0	0	1	0
16898599	21101909	37364197	48	1	0	1	0	0	1	38	101	14	92	77	13	10	1	2	1	1	1	1	1	1	1	2	1	228	228	228	228	150	47	190	36	26	0	0	0	0	0	1	2	1	400	0	0	1	0
19999297	21439025	37364566	43	0	0	0	0	0	0	36	122	16	97	88	8	12	1	2	0	0	0	0		0	0	7	1	627	627	627	627	87	103	113	8	7	1	1	1	1	0	1	2	1	600	0	0	0	1
13866393	22210963	37374739	78	0	1	1	0	1	1	37	60	22	100	51	7	8	2	1	0	1	1	0	1	0	0	4	1	458	458	458	458	155	14	202	9	2	0	0	0	0	0	1	2	1	400	0	0	1	0
13767908	26392995	37377060	78	0	1	0	0	0	1	37	80	16	100	67	15	9	1	1	1	1	1	0	0	1	0	4	1	168	168	168	168	156	27	203	15	6	0	0	0	0	1	1	2	1	400	0	0	1	0
18263451	23214725	37377348	50	0	0	0	0	0	0	39	117	25	98	84	4	13	1	2	0	0	0	0		0	0	2	1	167	167	167	167	219	25	285	5	1	0	0	0	0	0	1	1	0	200	0	1	0	0
10244884	24320339	37378106	74	0	0	0	0	1	1	37	67	20	100	55	8	8	2	4	0	0	1	1	0	0	0	2	1	2017	2017	2017	2017	117	38	152	33	15	0	0	0	0	1	1	2	1	2000	0	0	0	0
14923562	23365149	37379658	70	0	0	0	0	1	0	37	59	20	97	56	14	10	2	2	0	0	1	1	0	1	1	9	1	751	767	744	754	155	171	202	248	30	0	0	1	0	1	1	2	1	600	0	0	0	1
15617824	28907031	37380957	70	0	1	1	0	1	0	38	78	22	90	74	14	7	1	2	1	0	1	0	1	0	0	2	1	810	810	810	810	126	19	164	21	5	1	1	1	1	0	1	2	1	800	0	0	0	0
14282911	27859509	37386550	77	1	1	0	0	0	1	36	76	17	98	66	12	10	1	1	1	1	1	0	1	0	0	3	1	1130	1130	1130	1130	77	17	100	23	5	0	0	0	0	1	1	2	1	1000	0	0	0	0
11504645	23978714	37387231	57	0	0	0	0	0	1	36	94	18	96	98	6	8	1	1	0	1	0	0		0	0	2	1	16	16	16	16	453	22	589	4	2	0	0	0	0	0	0	0	0	0	1	0	0	0
13029424	23886642	37389590	63	1	0	0	0	0	1	37	87	15	100	69	12	9	1	1	1	1	0	0		0	0	4	1	113	113	113	113	174	38	226	8	8	0	0	0	0	0	1	1	0	200	0	1	0	0
11089729	27021321	37395251	92	0	1	0	0	1	1	37	103	20	99	54	11	9	2	1	1	0	0	0		0	0	4	1	45	45	45	45	227	19	295	16	7	1	1	0	0	1	1	1	0	200	0	1	0	0
17351491	20320232	37397327	78	1	0	1	0	0	1	37	108	16	99	65	9	8	0	2	1	1	1	0	1	0	0	2	1	285	285	285	285	187	17	243	16	5	0	0	0	0	0	0	2	1	400	0	0	1	0
16164098	23348948	37406379	82	1	1	0	0	0	0	39	98	19	96	65	4	10	1	1	1	1	0	0		0	0	3	1	125	125	125	125	94	6	122	14	8	1	1	1	0	1	1	1	0	200	0	1	0	0
14210233	20704130	37422256	72	0	0	0	0	1	1	37	84	21	96	100	20	9	5	1	1	0	0	0		0	0	3	1	1305	1305	1305	1305	123	14	160	20	13	0	0	0	0	1	1	2	1	1200	0	0	0	0
10790058	27076462	37424933	53	1	0	1	0	0	0	38	123	26	95	73	3	8	1	2	1	0	1	0	1	0	0	4	1	89	89	89	89	192	33	250	11	7	0	0	0	0	0	1	1	0	200	0	1	0	0
11004096	24846512	37429395	84	1	0	1	1	0	1	37	52	20	98	92	13	13	1	1	0	1	0	0		0	0	3	1	606	606	606	606	219	19	285	5	3	0	0	0	0	0	1	2	1	600	0	0	0	1
16775612	20786677	37431416	78	0	0	0	0	1	1	38	69	16	99	77	10	10	1	1	0	1	0	0		0	0	2	1	121	121	121	121	196	33	255	3	3	0	0	0	0	0	0	1	0	200	0	1	0	0
16817198	29513599	37432786	53	0	0	1	0	0	0	36	82	13	96	65	5	7	2	1	1	1	1	0	1	0	0	9	1	2076	2076	2076	2076	72	100	94	21	4	1	1	1	0	1	1	2	1	2000	0	0	0	0
14408427	20534655	37434482	46	0	0	0	0	0	1	38	86	20	100	61	4	9	1	1	1	1	0	0		0	0	2	1	180	180	180	180	200	13	260	3	1	0	0	0	0	1	0	2	1	400	0	0	1	0
12773948	25991673	37437044	59	1	0	1	0	0	0	37	82	13	95	65	8	7	1	1	1	0	1	1	1	1	1	3	1	2531	3103	2083	2572	159	54	203	71	31	0	0	0	0	0	1	2	1	2000	0	0	0	0
15998488	28333653	37440092	59	0	1	1	0	1	1	37	110	27	100	69	11	10	5	3	1	1	0	0		0	0	4	1	864	2502	864	1683	177	198	230	4	4	1	1	1	1	0	1	2	1	800	0	0	0	0
15663111	22651244	37441346	90	1	0	1	1	0	0	37	57	20	100	67	10	8	1	2	0	1	0	0		0	0	2	1	267	267	267	267	192	75	250	10	10	1	1	1	1	0	1	1	0	200	0	1	0	0
18366068	22391499	37445872	45	0	0	0	0	0	0	37	106	12	95	105	2	16	1	2	0	1	0	0		0	0	3	1	23930	23930	23930	23930	179	203	233	5	2	0	0	0	0	0	0	2	1	2000	0	0	0	0
17932276	25018638	37447763	53	1	0	1	0	0	1	37	127	22	96	99	17	9	1	1	0	0	0	0		0	0	2	1	74	74	74	74	170	16	215	6	3	0	0	0	0	0	0	1	0	200	0	1	0	0
17544377	25316291	37451760	60	1	0	0	1	0	1	34	50	15	100	75	20	12	1	2	1	1	0	0		0	0	3	1	604	604	604	604	135	46	177	5	3	0	0	0	0	1	0	2	1	600	0	0	0	1
17402501	29330417	37463202	75	0	1	0	0	0	1	37	80	21	96	71	10	9	1	1	1	1	1	0	0	1	0	2	1	719	719	719	719	163	19	212	3	1	0	0	0	0	0	0	2	1	600	0	0	0	1
18901656	28200652	37464217	91	0	1	1	0	0	1	36	85	29	99	70	15	11	1	3	1	1	0	0		0	0	4	1	143	143	143	143	204	40	265	6	4	0	0	0	0	0	1	1	0	200	0	1	0	0
14018137	22991874	37468126	61	0	1	0	1	1	1	38	104	17	97	84	15	10	2	3	1	1	0	0		0	0	3	1	1724	1724	1724	1724	134	106	174	23	13	0	0	0	0	1	1	2	1	1600	0	0	0	0
12808972	21529104	37469023	87	0	0	0	1	1	0	34	78	16	86	73	12	11	2	2	0	1	1	0	1	0	0	3	1	192	192	192	192	126	30	164	15	4	0	0	0	0	1	1	1	0	200	0	1	0	0
14872525	23191131	37469327	78	0	0	1	0	0	1	37	125	15	100	65	16	8	1	3	0	0	0	0		0	0	6	1	1030	1030	1030	1030	66	9	86	16	4	0	0	0	0	1	1	2	1	1000	0	0	0	0
13170839	27809496	37471803	47	1	0	0	0	0	1	37	101	19	100	93	5	8	1	2	1	1	0	0		0	0	5	1	269	269	269	269	138	167	179	6	2	0	0	0	0	0	0	2	1	400	0	0	1	0
15770122	21732373	37472201	68	0	0	0	0	0	1	37	78	24	94	72	23	8	1	1	0	0	0	0		0	0	4	1	797	797	797	797	92	7	120	1	1	1	1	1	1	1	0	2	1	600	0	0	0	1
13279382	26123016	37472660	83	0	1	1	1	0	0	37	90	20	100	67	5	9	2	3	0	1	1	1	0	0	0	3	1	128	128	128	128	117	23	152	15	3	0	0	0	0	0	1	1	0	200	0	1	0	0
17169478	27506994	37474836	89	0	1	0	0	1	1	36	49	17	96	48	5	9	4	1	0	1	0	0		0	0	4	1	137	137	137	137	245	30	319	10	4	0	0	0	0	0	1	1	0	200	0	1	0	0
11075865	28595464	37475623	56	0	0	0	1	0	1	38	73	22	95	114	17	15	1	3	0	1	1	1	0	0	0	7	1	188	188	188	188	154	17	200	21	21	1	1	1	1	1	1	1	0	200	0	1	0	0
18748695	24875716	37478616	26	0	1	0	0	0	1	37	126	31	98	73	14	11	1	2	1	1	1	0	0	1	0	2	1	139	139	139	139	182	5	237	7	1	0	0	0	0	0	0	1	0	200	0	1	0	0
18137539	21957886	37481477	53	0	0	0	0	0	1	37	61	22	100	63	15	13	1	1	0	1	1	0	1	0	0	2	1	691	691	691	691	130	146	169	19	11	0	0	0	0	0	1	2	1	600	0	0	0	1
14014348	23971331	37515846	34	0	0	0	0	0	1	37	98	12	100	64	5	9	0	1	1	1	0	0		0	0	6	1	1936	1936	1936	1936	68	93	88	19	3	0	0	0	0	0	0	2	1	1800	0	0	0	0
18715741	21424558	37521417	72	0	0	0	0	0	1	36	59	17	100	85	7	10	1	2	1	1	0	0		0	0	4	1	63	63	63	63	198	230	257	12	7	0	0	0	0	1	1	1	0	200	0	1	0	0
16120907	23202662	37523171	52	0	0	0	0	0	0	39	140	37	96	109	1	8	0	2	1	0	1	1	1	1	1	2	1	454	861	454	658	83	9	147	112	56	0	0	0	0	1	1	2	1	400	0	0	1	0
18995997	25109261	37525468	57	0	1	1	0	0	1	36	98	21	98	75	16	7	2	4	1	1	0	0		0	0	8	1	36963	41860	957	22028	107	185	139	26	25	1	1	1	1	1	1	2	1	2000	0	0	0	0
16568324	22883144	37529977	61	1	0	1	1	0	1	37	61	22	99	92	22	15	1	3	0	1	1	1	0	0	0	3	1	609	609	609	609	201	19	261	12	12	1	1	1	1	1	1	2	1	600	0	0	0	1
12009089	24580936	37535507	56	0	1	0	0	0	1	39	124	30	93	87	14	11	2	1	0	1	0	0		0	0	5	1	1467	1467	1467	1467	81	28	105	9	9	1	1	1	1	1	1	2	1	1400	0	0	0	0
14654545	21451478	37537126	71	0	0	0	0	1	1	37	85	16	96	82	9	9	1	1	0	1	0	0		0	0	5	1	202	202	202	202	137	11	178	12	3	0	0	0	0	0	1	1	0	200	0	1	0	0
10564547	22688082	37537235	92	0	1	0	1	0	1	37	65	20	99	83	29	9	1	3	1	1	0	0		0	0	2	1	39	39	39	39	249	15	324	8	4	0	0	0	0	0	1	1	0	200	0	1	0	0
14490023	22281868	37537968	80	0	0	0	0	0	1	37	80	21	100	64	9	11	0	2	1	1	0	0		0	0	2	1	197	197	197	197	150	24	195	2	1	0	0	0	0	0	1	2	1	400	0	0	1	0
15426182	23053735	37538218	69	0	1	1	0	1	1	37	108	30	95	91	9	8	8	2	0	1	1	0	0	0	1	4	1	5301	5371	5301	5336	97	23	126	28	23	0	0	0	0	0	1	2	1	2000	0	0	0	0
19205925	27352429	37544305	71	1	0	0	0	0	0	36	120	20	94	88	10	14	1	1	1	1	0	0		0	0	2	1	665	665	665	665	187	29	243	4	3	0	0	0	0	0	1	2	1	600	0	0	0	1
19913577	20355379	37544707	73	0	1	1	1	0	1	36	84	27	100	65	7	9	2	2	0	0	0	0		0	0	9	1	3586	3586	3586	3586	152	53	195	43	36	0	1	1	1	1	1	2	1	2000	0	0	0	0
19021139	24712332	37548065	50	0	0	0	0	0	1	36	112	19	99	121	14	7	1	4	0	1	0	0		0	0	2	1	88	88	88	88	82	16	107	2	2	1	1	1	1	0	1	1	0	200	0	1	0	0
15322536	26743801	37548194	56	0	1	0	0	1	0	38	57	20	95	68	28	8	3	3	0	1	0	0		0	0	9	1	75	75	75	75	257	18	334	2	1	1	1	1	1	1	1	1	0	200	0	1	0	0
16407546	27988115	37549759	36	0	0	0	0	0	0	37	106	21	97	75	19	8	2	3	1	1	1	1	0	0	0	6	1	1510	1510	970	1141	153	75	200	28	11	0	0	0	0	0	1	2	1	1400	0	0	0	0
19612651	26802085	37561165	62	1	0	0	1	0	1	37	63	15	98	86	14	9	1	2	0	1	0	0		0	0	4	1	105	127	105	116	206	15	276	6	1	0	0	0	0	1	0	1	0	200	0	1	0	0
13811115	27914796	37562798	60	0	0	0	0	0	0	36	62	16	100	87	6	9	1	1	0	1	0	0		0	0	2	1	876	876	876	876	115	18	150	17	6	0	0	0	0	0	1	2	1	800	0	0	0	0
14808365	26057783	37563241	61	1	0	1	0	0	1	35	106	17	100	69	12	9	5	2	1	1	0	0		0	0	8	1	126	126	126	126	218	22	283	3	4	1	1	1	1	1	1	1	0	200	0	1	0	0
12502220	21737102	37565086	84	1	1	0	0	0	0	37	110	27	92	69	23	9	2	2	0	1	0	0		0	0	3	1	78	78	78	78	252	9	328	7	2	0	0	0	0	1	0	1	0	200	0	1	0	0
15512392	24103063	37566117	32	0	0	0	0	0	0	37	110	19	99	70	7	11	0	2	1	1	0	0		0	0	8	1	1901	1901	1901	1901	64	84	83	14	2	0	0	0	0	0	0	2	1	1800	0	0	0	0
17059566	29989470	37567576	67	0	0	0	0	1	1	38	87	14	99	108	8	7	2	1	1	1	1	0	1	0	0	4	1	92	92	92	92	245	90	319	22	21	0	0	0	0	0	1	1	0	200	0	1	0	0
15270301	27738686	37568338	74	0	1	1	0	1	0	37	60	23	100	60	18	9	4	1	0	1	0	0		0	0	5	1	338	338	338	338	162	70	211	27	27	0	0	0	0	1	1	1	0	200	0	1	0	0
17541182	29181905	37584134	84	1	0	0	0	0	0	37	80	14	97	59	15	10	1	1	0	1	0	0		0	0	3	1	245	245	245	245	122	66	159	4	4	1	1	1	1	0	1	1	0	200	0	1	0	0
11239127	25655066	37588835	64	0	0	0	0	0	1	37	140	16	95	117	14	14	2	4	0	1	0	0		0	0	3	1	36963	41860	33281	35657	184	319	239	4	4	1	1	1	1	0	1	2	1	2000	0	0	0	0
14280581	26350192	37589355	59	0	0	0	0	1	1	37	111	12	95	119	12	14	6	3	0	1	0	0		0	0	4	1	19876	39278	19876	29577	92	126	120	7	2	0	0	0	0	1	1	2	1	2000	0	0	0	0
17907953	26957275	37590499	80	0	1	0	0	0	0	37	98	20	96	63	13	7	4	1	1	1	0	0		0	0	6	1	378	378	378	378	116	74	151	11	11	1	1	1	1	1	1	2	1	400	0	0	1	0
17269372	25584000	37590834	85	0	1	1	1	1	0	36	71	17	95	51	16	8	3	1	1	1	1	0	0	0	1	2	1	153	153	153	153	240	40	312	1	2	1	1	1	1	1	1	2	1	400	0	0	1	0
15353694	22062978	37596242	65	1	0	0	1	0	1	37	91	21	100	63	4	7	1	2	1	1	0	0		0	0	4	1	1596	1596	1596	1596	159	61	208	32	9	0	0	0	0	0	1	2	1	1400	0	0	0	0
10462712	22375313	37602163	46	0	0	0	0	0	0	36	96	11	98	70	17	10	0	1	1	1	1	1	1	1	0	3	1	173	173	173	173	148	20	192	31	31	0	0	0	0	1	1	2	1	400	0	0	1	0
12236130	20464555	37603649	63	0	0	0	0	0	1	36	91	24	92	72	14	8	3	3	0	1	0	0		0	0	3	1	16946	16946	16946	16946	87	90	117	3	3	1	1	1	1	1	1	2	1	2000	0	0	0	0
19640525	20288632	37608258	46	0	0	0	0	0	0	37	100	20	96	88	17	11	3	2	0	1	0	0		0	0	3	1	680	680	680	680	126	62	166	7	7	1	1	1	1	1	1	2	1	600	0	0	0	1
12589189	25072625	37609763	29	1	0	0	0	0	1	37	86	10	96	60	11	11	1	1	0	0	0	0		0	0	4	1	151	151	151	151	193	32	251	2	2	0	0	0	0	0	0	1	0	200	0	1	0	0
15848042	25072061	37617082	54	0	0	1	0	0	1	36	100	15	100	80	5	6	1	2	1	1	0	0		0	0	8	1	814	814	814	814	24	36	31	1	1	1	1	1	1	1	0	2	1	800	0	0	0	0
10623490	24449903	37620076	87	0	1	0	1	0	1	37	82	22	98	64	14	11	2	2	0	1	0	0		0	0	6	1	436	436	436	436	141	64	183	6	6	1	1	1	1	1	1	2	1	400	0	0	1	0
15031111	27917559	37624914	71	0	1	1	0	0	0	37	93	21	91	100	16	16	2	2	0	1	0	0		0	0	2	1	605	605	605	605	158	19	205	42	7	0	1	1	0	0	1	2	1	600	0	0	0	1
15383083	20134249	37629757	61	1	0	0	0	0	0	37	122	24	97	80	21	11	5	2	0	1	0	0		0	0	4	1	547	547	547	547	172	9	224	6	2	0	0	0	0	0	0	2	1	400	0	0	1	0
19512910	27790996	37634875	70	1	0	0	1	0	1	37	82	19	99	65	17	9	2	1	1	1	0	0		0	0	5	1	134	134	134	134	182	9	237	4	1	0	0	0	0	0	1	1	0	200	0	1	0	0
14299136	22400450	37640039	62	1	0	1	1	0	1	37	83	22	100	86	30	9	1	2	0	1	1	1	0	1	0	3	1	1318	1318	1318	1318	138	48	179	41	32	0	0	0	0	0	1	2	1	1200	0	0	0	0
10150167	25951281	37644473	74	0	0	0	0	0	0	37	97	14	95	71	12	12	0	1	1	0	0	0		0	0	2	1	25	25	25	25	249	47	324	9	2	0	0	0	0	0	1	1	0	200	0	1	0	0
17494417	24730278	37646923	61	0	0	1	1	1	1	37	78	18	100	95	16	6	6	1	0	1	0	0		0	0	3	1	2466	2466	2466	2466	101	28	131	33	4	0	1	0	0	1	1	2	1	2000	0	0	0	0
16130487	27778408	37652413	61	0	1	0	1	0	1	37	67	23	100	118	6	9	1	1	0	1	1	0	0	1	0	4	1	343	343	343	343	93	29	121	41	6	0	0	0	0	0	1	1	0	200	0	1	0	0
17608002	25118435	37654008	76	0	1	1	1	0	1	37	80	31	87	82	11	8	2	3	1	1	0	0		0	0	3	1	90	90	90	90	314	18	408	10	10	1	1	1	1	0	1	1	0	200	0	1	0	0
15501317	26549040	37656575	61	1	0	0	0	0	0	37	84	21	94	74	8	14	1	2	1	1	0	0		0	0	5	1	14398	14398	14398	14398	230	169	299	8	3	0	0	0	0	0	1	2	1	2000	0	0	0	0
16535066	21308155	37661380	52	0	1	0	1	0	1	37	100	30	98	92	25	11	2	1	0	1	0	0		0	0	4	1	67	67	67	67	168	42	221	5	3	0	0	0	0	1	0	1	0	200	0	1	0	0
18969221	26602659	37667477	67	1	0	0	0	0	1	37	80	19	86	55	2	10	1	3	0	1	1	1	0	0	0	3	1	32195	32195	24525	28360	140	197	182	58	58	0	0	0	0	1	1	2	1	2000	0	0	0	0
10525349	23082015	37668932	53	0	0	0	0	0	1	39	111	22	100	56	11	12	2	2	0	1	0	0		0	0	4	1	430	430	430	430	141	18	183	9	4	0	0	0	0	1	1	2	1	400	0	0	1	0
10572186	28393903	37672917	80	1	0	0	0	0	1	36	71	16	96	91	3	10	0	1	1	1	0	0		0	0	2	1	1412	1412	1412	1412	129	72	168	6	2	0	0	0	0	0	0	2	1	1400	0	0	0	0
12264134	25257503	37673110	73	0	1	1	1	1	1	38	76	20	97	98	9	7	3	1	1	0	0	0		0	0	5	1	153	153	153	153	153	19	199	7	5	0	0	0	0	0	0	2	1	400	0	0	1	0
13595620	22243899	37684512	83	1	1	0	1	0	1	36	75	19	100	92	9	8	1	1	1	1	1	0	1	0	0	5	1	39	39	39	39	241	27	313	20	4	0	0	0	0	0	1	1	0	200	0	1	0	0
10095570	28612694	37685093	64	0	1	1	1	1	1	37	70	20	95	75	11	11	2	3	0	1	0	0		0	0	6	1	3034	3034	3034	3034	133	92	173	3	3	1	1	1	1	0	1	2	1	2000	0	0	0	0
12656773	29135073	37685433	56	1	0	0	0	0	1	37	97	16	95	109	5	11	1	2	1	0	1	0	1	0	0	6	1	178	297	178	238	119	55	155	29	13	0	0	0	0	0	1	2	1	400	0	0	1	0
17222513	25055557	37685708	68	0	1	0	1	0	1	38	124	22	94	60	21	12	1	2	0	1	1	1	0	0	0	4	1	292	292	292	292	142	17	185	9	7	0	0	0	0	1	0	1	0	200	0	1	0	0
16376075	27349721	37688367	66	0	0	0	0	1	1	37	85	23	97	63	17	8	4	4	0	1	0	0		0	0	7	1	1945	1945	1945	1945	42	60	55	10	10	1	1	1	1	1	1	2	1	1800	0	0	0	0
15293866	23881393	37694805	46	0	0	1	0	0	0	37	87	14	97	82	13	9	1	1	0	1	0	0		0	0	6	1	68	68	68	68	259	186	337	7	3	0	0	0	0	0	1	1	0	200	0	1	0	0
11601553	26887256	37700347	89	0	0	0	0	1	1	38	111	25	97	81	19	9	1	1	1	0	1	0	1	0	0	3	1	3020	3020	3020	3020	95	81	124	47	5	0	1	0	0	0	1	2	1	2000	0	0	0	0
17832311	20147174	37706110	23	0	0	0	0	0	1	39	130	37	94	69	22	10	1	2	1	1	1	0	0	1	0	3	1	157	157	157	157	225	53	293	6	2	0	0	0	0	0	1	2	1	400	0	0	1	0
13187609	22681948	37707849	89	0	1	0	0	0	1	37	92	22	99	97	30	10	1	2	1	0	1	0	1	0	0	2	1	99	99	99	99	230	13	299	16	3	1	1	0	0	0	1	1	0	200	0	1	0	0
10960904	27175241	37713146	48	0	0	0	0	0	1	37	82	20	99	73	6	10	1	1	0	1	0	0		0	0	2	1	381	381	381	381	128	19	166	8	6	0	0	0	0	0	1	1	0	200	0	1	0	0
12284553	29916605	37713469	78	1	1	0	1	0	0	37	75	17	94	65	9	9	3	2	0	1	0	0		0	0	10	1	19442	19442	19442	19442	126	128	164	7	3	0	0	0	0	1	1	2	1	2000	0	0	0	0
10289125	25484210	37716176	29	1	0	0	0	0	0	39	124	21	99	72	29	12	1	4	0	1	0	0		0	0	2	1	6041	6041	6041	6041	153	118	199	3	4	1	1	0	1	0	1	2	1	2000	0	0	0	0
19097156	29208016	37719320	66	0	1	0	1	0	1	37	124	20	93	104	11	10	1	1	0	1	0	0		0	0	2	1	416	416	416	416	180	32	234	2	1	0	0	0	0	0	0	2	1	400	0	0	1	0
10741013	20143741	37722818	41	0	0	0	0	0	1	36	67	14	97	55	18	10	1	2	1	0	0	0		0	0	2	1	20	20	20	20	267	248	347	1	1	0	0	0	0	0	0	1	0	200	0	1	0	0
15684838	20494418	37733259	62	1	1	0	0	0	0	38	72	22	96	54	17	12	1	2	1	1	0	0		0	0	6	1	71	71	71	71	158	30	205	25	15	0	1	0	0	1	1	1	0	200	0	1	0	0
19253485	29860063	37742425	82	0	0	0	0	0	1	37	105	21	97	90	26	9	1	1	1	0	1	1	0	0	1	4	1	487	487	487	487	146	13	190	41	40	0	1	0	0	0	1	2	1	400	0	0	1	0
15380359	21728887	37742633	86	0	1	0	1	0	1	37	87	20	99	75	19	10	5	2	0	1	0	0		0	0	8	1	1371	1371	1371	1371	129	51	171	14	14	1	1	1	1	1	1	2	1	1200	0	0	0	0
17944159	20304030	37749481	59	1	0	0	0	0	0	37	70	20	98	75	11	10	1	2	1	1	0	0		0	0	4	1	281	281	281	281	150	56	196	0	2	1	1	1	1	1	1	2	1	400	0	0	1	0
16159462	28573871	37757420	65	1	0	1	0	0	0	37	69	20	100	75	4	7	3	2	1	0	1	0	1	0	0	7	1	1918	2626	1918	2272	164	89	213	45	9	1	1	1	0	0	1	2	1	1800	0	0	0	0
11713814	28888207	37767813	61	0	0	1	0	1	1	38	83	13	96	75	10	9	2	4	1	1	0	0		0	0	17	1	286	286	286	286	56	62	73	9	9	1	1	1	1	1	1	2	1	400	0	0	1	0
15944907	20633760	37771457	66	1	0	0	0	0	1	36	64	16	98	70	5	10	1	2	1	1	0	0		0	0	3	1	97	97	86	92	261	58	325	3	1	0	0	0	0	0	1	1	0	200	0	1	0	0
10203665	22462394	37774683	79	0	0	0	0	1	1	37	72	17	99	64	9	11	1	1	1	1	0	0		0	0	5	1	394	394	394	394	147	38	191	4	3	0	0	0	0	1	0	2	1	400	0	0	1	0
14707155	28755084	37777813	71	1	0	0	1	0	1	37	49	8	99	66	9	10	1	2	0	1	0	0		0	0	5	1	307	307	307	307	146	50	190	9	5	0	0	0	0	1	1	1	0	200	0	1	0	0
18553055	25242305	37779784	34	0	0	0	0	1	1	37	69	23	100	118	8	12	8	1	0	1	0	0		0	0	5	1	828	828	828	828	191	29	248	2	2	0	0	0	0	0	1	2	1	800	0	0	0	0
19643292	21264675	37781270	85	0	0	0	1	1	1	37	71	19	100	79	17	8	5	1	0	1	1	1	0	0	1	4	1	830	830	830	830	126	26	164	22	9	0	0	0	0	1	1	2	1	800	0	0	0	0
19833452	21712950	37782424	91	0	1	1	0	1	1	37	104	26	95	64	13	8	1	1	1	1	0	0		0	0	2	1	257	257	257	257	175	11	228	12	2	0	0	0	0	0	1	2	1	400	0	0	1	0
10920228	23466911	37783060	60	0	1	0	1	0	1	38	92	24	92	74	6	9	1	1	1	1	0	0		0	0	3	1	1178	1178	1178	1178	134	29	174	14	10	0	0	0	0	1	1	2	1	1000	0	0	0	0
13261101	27468602	37783781	63	1	0	1	0	0	0	35	101	19	100	86	13	12	1	2	0	1	1	1	0	0	0	10	1	1146	1146	1146	1146	276	87	359	35	30	0	1	1	0	1	0	2	1	1000	0	0	0	0
17053342	26907926	37786967	34	0	0	0	0	0	1	36	98	18	98	85	10	10	2	2	0	1	0	0		0	0	3	1	377	377	377	377	224	42	291	7	2	0	0	0	0	0	0	1	0	200	0	1	0	0
17929368	25060449	37787786	45	0	0	0	0	0	0	37	108	28	98	57	5	13	1	1	0	1	0	0		0	0	7	1	911	911	911	911	142	33	185	23	14	0	0	0	0	0	1	2	1	800	0	0	0	0
12400695	21668402	37788644	61	1	1	0	0	0	0	37	140	20	100	87	22	11	1	1	1	1	0	0		0	0	4	1	1877	1877	1877	1877	164	84	213	13	6	0	0	0	0	1	1	2	1	1800	0	0	0	0
16957142	27393906	37794348	25	0	0	0	0	0	0	37	49	24	98	75	12	13	1	1	0	1	1	0	0	0	1	2	1	503	503	503	503	204	26	265	33	33	0	0	0	0	1	1	2	1	400	0	0	1	0
17174562	22148341	37795362	85	0	1	1	1	0	0	37	86	22	97	64	8	10	1	2	1	1	0	0		0	0	3	1	56	56	56	56	231	46	300	8	1	0	0	0	0	0	1	1	0	200	0	1	0	0
12697381	27675384	37795758	79	0	0	1	0	0	1	37	79	11	100	75	3	10	0	2	1	1	0	0		0	0	4	1	137	137	137	137	222	78	289	6	1	1	1	1	0	0	0	1	0	200	0	1	0	0
15274195	27623566	37800255	45	0	0	0	0	1	1	38	105	8	100	52	11	8	4	2	1	1	0	0		0	0	13	1	773	773	773	773	57	72	74	36	31	0	1	0	0	1	1	2	1	600	0	0	0	1
19262736	28176121	37804200	53	0	1	0	0	0	1	37	107	29	92	73	26	8	1	2	0	1	0	0		0	0	2	1	1407	1407	1407	1407	80	102	104	18	14	1	1	1	0	0	1	2	1	1400	0	0	0	0
14913179	24390132	37805470	61	0	0	0	0	0	0	38	108	28	98	72	4	10	1	2	0	0	0	0		0	0	3	1	1712	1712	1712	1712	120	73	156	22	22	0	0	0	0	0	1	2	1	1600	0	0	0	0
15622959	25420391	37805819	82	0	1	0	1	1	1	36	85	16	100	75	11	8	5	1	0	0	0	0		0	0	6	1	1524	1524	1524	1524	122	115	159	23	3	1	1	1	0	0	1	2	1	1400	0	0	0	0
17289025	22372127	37807553	64	1	0	1	0	0	0	37	104	24	98	95	10	12	1	1	1	1	0	0		0	0	2	1	816	816	816	816	131	22	170	11	4	0	0	0	0	0	1	2	1	800	0	0	0	0
17806475	25425740	37807704	60	1	0	1	1	0	1	36	76	8	98	73	12	8	2	4	1	1	0	0		0	0	13	1	36963	41860	33281	35657	137	483	178	19	6	0	0	0	0	1	1	2	1	2000	0	0	0	0
19073583	29904727	37813077	55	1	0	0	0	0	0	37	84	21	96	65	6	10	2	2	0	1	0	0		0	0	4	1	317	317	317	317	96	73	125	13	4	0	0	0	0	1	1	1	0	200	0	1	0	0
17857442	29149108	37813117	81	1	0	1	0	0	1	37	82	14	96	99	33	8	1	4	0	0	0	0		0	0	5	1	13075	13075	13075	13075	104	71	131	15	3	1	1	1	1	0	1	2	1	2000	0	0	0	0
17195403	28485656	37813272	80	1	0	0	1	0	0	36	140	26	95	88	11	12	1	3	0	1	0	0		0	0	8	1	3421	3421	3421	3421	103	62	136	2	1	1	1	1	1	1	1	2	1	2000	0	0	0	0
15682089	24926222	37815621	54	0	0	0	0	0	0	37	79	26	95	65	4	10	2	4	1	0	0	0		0	0	4	1	2380	2380	2380	2380	194	95	252	3	1	1	1	1	0	0	1	2	1	2000	0	0	0	0
13105864	27810235	37820266	68	0	0	0	0	0	1	38	121	28	98	82	18	9	2	3	0	1	1	0	0	0	1	2	1	1071	1071	1071	1071	74	17	96	54	26	0	0	0	0	1	1	2	1	1000	0	0	0	0
18622600	20433528	37832938	63	0	0	0	0	1	1	37	56	8	100	94	11	8	4	2	1	1	1	0	0	1	0	4	1	4211	4211	4211	4211	73	79	95	24	1	1	1	1	0	0	1	2	1	2000	0	0	0	0
15987592	27039882	37858271	74	1	0	0	0	0	1	36	77	23	97	78	17	8	1	2	1	1	0	0		0	0	3	1	1372	1372	1372	1372	101	19	131	9	2	0	0	0	0	1	1	2	1	1200	0	0	0	0
15248866	28736378	37864578	58	1	0	0	0	0	1	37	80	16	97	81	6	8	0	2	1	1	0	0		0	0	6	1	329	329	329	329	157	65	204	29	16	0	0	0	0	0	1	2	1	400	0	0	1	0
18809588	24013873	37870474	85	1	0	0	0	0	1	36	62	14	97	62	8	8	1	2	1	1	1	1	0	1	1	4	1	197	197	183	190	188	34	181	45	43	0	1	1	1	1	1	2	1	400	0	0	1	0
15560331	22019103	37878640	84	0	0	0	0	0	1	37	83	21	100	78	8	10	1	2	0	1	0	0		0	0	2	1	467	467	467	467	160	13	208	50	3	0	0	0	0	0	1	2	1	400	0	0	1	0
10567490	23479235	37883727	41	0	1	0	0	0	1	39	115	21	100	81	10	11	1	1	1	1	0	0		0	0	5	1	1120	1120	1120	1120	87	31	113	11	4	0	0	0	0	0	0	2	1	1000	0	0	0	0
13078497	26760002	37888515	68	0	1	1	1	1	1	37	86	28	97	75	16	6	4	2	0	1	1	0	1	0	0	2	1	374	374	374	374	142	11	185	13	9	0	0	0	0	0	1	1	0	200	0	1	0	0
14199097	26522146	37890445	92	0	0	0	0	1	1	37	99	25	94	83	27	10	1	2	0	1	0	0		0	0	4	1	486	486	486	486	103	9	134	12	2	0	0	0	0	0	1	2	1	400	0	0	1	0
16811709	24286546	37897551	82	1	1	0	1	0	1	38	98	24	95	68	10	11	1	2	0	1	1	0	0	1	0	2	1	541	541	541	541	123	19	160	7	4	1	1	0	0	0	0	2	1	400	0	0	1	0
15503922	28382956	37901333	56	0	1	1	0	0	0	37	104	20	100	71	6	13	2	2	0	1	0	0		0	0	6	1	368	718	368	543	176	215	229	18	10	0	0	0	0	1	1	1	0	200	0	1	0	0
13654781	23995673	37906363	67	0	0	0	0	0	1	37	69	21	96	82	12	10	1	1	1	0	0	0		0	0	3	1	231	231	231	231	120	50	156	6	2	0	0	0	0	1	0	2	1	400	0	0	1	0
10024982	25154057	37919901	86	0	0	0	1	0	1	37	58	18	100	73	14	9	2	2	0	1	0	0		0	0	6	1	62	62	62	62	193	7	251	22	21	1	1	1	1	1	1	1	0	200	0	1	0	0
12684822	28115389	37924898	72	0	1	0	0	1	0	37	113	32	100	75	17	11	2	2	1	0	0	0		0	0	2	1	136	136	136	136	177	20	230	9	9	0	1	0	0	0	1	1	0	200	0	1	0	0
13549627	29171967	37929227	38	1	0	0	0	0	1	39	130	24	98	64	14	13	2	2	0	1	1	0	0	1	0	2	1	1066	1066	1066	1066	98	8	127	21	16	0	0	0	0	0	1	2	1	1000	0	0	0	0
10326798	23870114	37931604	68	0	1	1	1	1	1	37	68	21	94	101	13	8	1	2	1	1	1	0	0	0	1	2	1	50	50	50	50	274	29	356	10	4	0	0	0	0	0	1	1	0	200	0	1	0	0
19897794	28035398	37931933	86	0	1	1	1	1	1	36	108	27	93	56	21	9	5	1	1	1	1	0	1	0	0	5	1	496	496	496	496	184	51	239	16	5	0	0	0	0	0	1	2	1	400	0	0	1	0
12691278	29559513	37931991	68	1	0	0	0	0	1	37	89	25	100	84	18	9	1	2	1	0	0	0		0	0	4	1	1493	1493	1493	1493	146	24	190	12	12	1	1	1	1	1	1	2	1	1400	0	0	0	0
14642247	25057581	37934000	48	0	1	0	0	0	0	37	98	14	93	79	11	15	1	1	0	1	0	0		0	0	3	1	368	368	368	368	184	24	239	28	2	0	0	0	0	0	0	1	0	200	0	1	0	0
16680846	27593240	37943405	30	0	0	0	0	0	1	37	125	19	94	73	5	9	1	3	1	1	1	1	0	0	0	2	1	1054	1054	1054	1054	96	132	125	48	20	0	0	0	0	0	1	2	1	1000	0	0	0	0
16721869	22971398	37945848	52	1	0	0	0	0	1	37	96	19	97	92	13	10	0	1	1	1	0	0		0	0	3	1	1221	1221	1221	1221	190	30	247	29	29	0	0	0	0	0	1	2	1	1200	0	0	0	0
15107925	21128587	37949677	34	1	0	0	0	0	0	37	70	22	95	111	2	9	1	1	1	1	0	0		0	0	2	1	16	16	16	16	271	31	352	3	1	0	0	0	0	0	0	1	0	200	0	1	0	0
16396738	23027002	37953650	68	0	1	1	1	1	1	37	74	17	93	57	6	6	1	2	1	1	0	0		0	0	2	1	5545	5545	5545	5545	49	26	64	9	4	0	0	0	0	0	1	2	1	2000	0	0	0	0
17242478	23690967	37956023	23	0	0	0	0	0	0	39	129	16	94	73	3	9	1	1	1	0	1	0	1	0	0	2	1	217	217	217	217	231	53	300	26	23	0	0	0	0	0	1	2	1	400	0	0	1	0
16145053	25881346	37956867	42	0	0	0	0	0	0	38	117	36	93	95	9	12	2	1	1	1	1	0	0	1	0	2	1	763	763	763	763	88	17	114	27	23	0	0	0	0	0	1	2	1	600	0	0	0	1
14239831	26457519	37957986	73	0	1	0	0	0	1	37	105	37	99	64	20	7	1	3	1	1	0	0		0	0	3	1	2186	2186	2186	2186	129	72	168	3	3	1	1	1	1	1	1	2	1	2000	0	0	0	0
10507767	27581747	37966394	66	1	0	0	0	0	1	36	79	12	100	70	19	10	1	2	0	0	0	0		0	0	7	1	585	585	585	585	140	12	182	3	1	0	0	0	0	0	0	2	1	400	0	0	1	0
12119407	28340853	37968741	63	0	0	0	0	0	1	37	57	16	100	63	5	8	1	2	0	1	0	0		0	0	3	1	16	16	16	16	347	13	451	4	1	0	0	0	0	0	0	0	0	0	1	0	0	0
10378991	29376343	37980262	66	0	1	0	0	1	1	37	90	26	100	86	34	8	4	4	0	1	1	0	0	1	0	8	1	2020	2020	2020	2020	204	21	265	15	9	1	1	1	0	0	1	2	1	2000	0	0	0	0
15155386	29640952	37984140	57	1	0	0	0	0	1	38	140	19	99	102	11	7	1	1	0	1	0	0		0	0	4	1	7901	7901	7901	7901	131	61	170	31	16	0	0	0	0	1	1	2	1	2000	0	0	0	0
12751607	27373350	37987126	70	0	1	0	1	1	1	36	52	19	100	90	8	8	3	2	0	1	0	0		0	0	2	1	652	652	652	652	79	59	103	14	1	0	0	0	0	0	1	2	1	600	0	0	0	1
14212440	25832156	37989693	74	1	0	0	1	0	0	36	63	13	92	78	13	11	1	1	0	1	0	0		0	0	4	1	1582	1582	1582	1582	103	75	134	4	2	0	0	0	0	1	0	2	1	1400	0	0	0	0
15271097	29789441	37999546	76	0	1	1	0	0	1	37	85	22	93	47	7	9	1	1	0	1	1	0	0	1	0	2	1	211	211	211	211	188	30	244	11	2	0	0	0	0	0	1	1	0	200	0	1	0	0
14933427	20694247	37999683	92	1	0	0	0	0	0	36	73	23	86	65	30	12	2	3	1	1	0	0		0	0	2	1	1270	1270	1270	1270	106	20	138	2	2	1	1	1	1	0	1	2	1	1200	0	0	0	0
11568686	28363037	38000338	62	1	0	0	0	0	0	36	71	18	100	87	19	13	1	1	1	1	1	0	1	0	0	2	1	298	298	298	298	161	43	209	22	19	0	0	0	0	0	1	2	1	400	0	0	1	0
17118588	22890097	38001523	39	1	0	0	0	0	1	37	81	19	97	80	6	7	2	2	1	1	1	0	1	0	0	6	1	1132	1132	1132	1132	180	110	234	16	16	1	1	1	1	0	1	2	1	1000	0	0	0	0
14454179	28081673	38002029	40	0	0	0	0	1	1	38	128	23	95	97	8	6	8	1	1	1	0	0		0	0	4	1	103	103	103	103	151	54	196	12	12	0	0	0	0	0	1	1	0	200	0	1	0	0
13847788	27562694	38011822	61	1	0	1	0	0	1	37	115	23	96	83	13	11	0	2	0	1	0	0		0	0	2	1	1004	1004	1004	1004	136	24	177	9	1	0	0	0	0	0	0	2	1	1000	0	0	0	0
16889487	23650319	38015685	72	0	0	0	1	0	0	37	74	28	98	64	1	8	2	4	1	0	0	0		0	0	5	1	1403	1403	1403	1403	120	74	159	3	3	1	1	1	1	1	1	2	1	1400	0	0	0	0
14411859	24976204	38018615	71	1	0	0	0	0	0	37	103	20	97	105	11	16	2	2	0	1	1	1	0	1	1	2	1	1791	1991	1568	1861	63	18	86	102	102	0	0	0	0	0	1	2	1	1600	0	0	0	0
13299285	21326946	38020336	73	1	0	1	1	0	0	37	114	25	98	63	31	10	1	1	0	0	1	0	0	0	1	2	1	465	465	465	465	146	11	185	25	8	0	0	0	0	0	1	2	1	400	0	0	1	0
18615743	27187308	38027498	65	0	0	0	0	0	1	38	76	17	96	92	10	9	1	1	0	1	1	1	0	0	1	3	1	720	720	720	720	108	19	140	27	10	0	0	0	0	0	0	2	1	600	0	0	0	1
18454868	26533645	38035833	56	0	0	0	0	0	0	38	96	31	94	109	6	9	1	2	1	1	1	0	1	0	1	6	1	216	522	216	369	266	111	346	32	32	0	1	1	1	0	1	2	1	400	0	0	1	0
12442951	24590335	38038006	72	1	0	0	0	0	1	37	82	18	98	79	14	8	2	2	1	1	0	0		0	0	2	1	424	424	424	424	160	36	208	11	1	0	0	0	0	0	1	2	1	400	0	0	1	0
13696494	20396589	38039429	39	0	1	0	0	0	0	38	90	24	94	74	23	13	1	1	0	1	0	0		0	0	2	1	310	310	310	310	223	112	290	30	29	0	0	0	0	0	1	1	0	200	0	1	0	0
17104139	20201177	38041019	65	1	0	0	1	0	1	36	105	30	100	70	10	8	2	3	0	1	1	1	0	0	0	7	1	1361	23700	1361	12531	113	174	147	21	21	0	0	0	0	1	1	2	1	1200	0	0	0	0
11251419	22008181	38041292	86	1	1	0	1	1	1	37	49	24	98	59	13	11	1	1	1	1	0	0		0	0	5	1	542	542	542	542	164	22	213	6	4	0	0	0	0	0	1	2	1	400	0	0	1	0
13714286	21520904	38043302	51	0	0	0	0	0	1	39	111	30	99	84	4	6	3	4	0	1	0	0		0	0	5	1	2462	2489	2462	2476	89	23	116	15	3	0	0	0	0	0	0	2	1	2000	0	0	0	0
18960171	20423244	38045834	60	0	0	0	0	0	1	36	105	16	99	100	6	10	1	2	1	1	0	0		0	0	2	1	324	324	324	324	133	17	173	11	1	1	1	0	0	0	1	2	1	400	0	0	1	0
11800278	21467227	38046114	80	0	1	1	0	0	1	37	65	18	95	69	12	7	1	2	1	1	0	0		0	0	5	1	65	65	65	65	254	27	330	8	2	0	0	0	0	1	1	1	0	200	0	1	0	0
18722214	25767442	38051975	52	1	0	0	0	0	0	37	82	12	92	102	7	14	1	2	0	1	0	0		0	0	4	1	15129	15129	15129	15129	151	212	196	13	3	0	0	0	0	0	0	2	1	2000	0	0	0	0
15168417	21190076	38053193	83	1	0	0	0	0	0	37	77	27	94	69	22	9	1	2	0	1	0	0		0	0	3	1	889	889	889	889	130	20	169	7	5	0	0	0	0	0	1	2	1	800	0	0	0	0
11413537	24641041	38058757	74	0	1	1	1	1	1	38	71	21	100	74	24	10	2	1	0	1	0	0		0	0	4	1	546	546	546	546	145	56	189	12	12	0	0	0	0	1	1	2	1	400	0	0	1	0
13934827	28736102	38060507	67	0	0	0	0	0	1	38	110	8	91	73	8	11	1	2	0	0	0	0		0	0	5	1	584	584	584	584	154	29	200	19	18	1	1	1	1	0	1	2	1	400	0	0	1	0
12694687	24909812	38064734	76	0	0	0	0	0	1	36	77	21	90	51	17	8	1	4	1	1	0	0		0	0	4	1	647	647	647	647	72	9	94	2	2	1	1	1	1	1	0	2	1	600	0	0	0	1
17177703	21196890	38088832	63	0	1	1	0	0	0	37	87	22	97	74	4	13	2	2	1	1	0	0		0	0	3	1	308	308	308	308	187	57	239	7	1	0	0	0	0	0	0	2	1	400	0	0	1	0
18385272	29778817	38094100	75	1	0	0	0	0	0	37	91	22	93	74	6	7	2	1	1	1	0	0		0	0	3	1	576	576	576	576	166	52	217	2	1	0	0	0	0	0	0	2	1	400	0	0	1	0
15640564	22332481	38095904	84	0	1	1	0	1	0	37	93	22	93	57	29	9	5	1	0	1	1	0	1	0	0	4	1	109	109	109	109	239	38	311	23	14	1	1	1	0	0	1	1	0	200	0	1	0	0
17998120	27383355	38102168	55	0	0	1	0	0	1	37	103	19	97	68	13	7	7	1	1	1	1	1	0	0	0	6	1	829	829	829	829	132	40	168	21	13	0	0	0	0	1	1	2	1	800	0	0	0	0
13108511	24540817	38109349	61	0	1	0	1	0	1	39	77	30	93	69	19	9	2	3	1	1	0	0		0	0	9	1	417	417	417	417	185	20	241	12	12	0	0	0	0	1	1	2	1	400	0	0	1	0
11043763	25595971	38113549	56	1	0	1	0	0	1	37	57	8	92	65	9	9	1	1	0	1	0	0		0	0	3	1	1079	1079	1079	1079	168	47	212	9	1	0	0	0	0	0	0	2	1	1000	0	0	0	0
15738167	20520936	38114645	88	0	1	0	1	1	1	37	113	23	99	60	15	8	2	1	0	1	1	0	1	0	0	3	1	872	872	872	872	133	17	173	7	1	0	0	0	0	0	0	2	1	800	0	0	0	0
18033645	22052404	38115934	52	0	0	0	0	0	1	37	109	28	97	63	15	12	1	2	0	1	1	1	0	0	1	5	1	196	196	196	196	149	57	195	12	8	0	0	0	0	1	1	1	0	200	0	1	0	0
15696359	25823800	38119208	70	1	0	0	0	0	1	37	99	33	96	54	5	7	1	3	1	1	1	0	1	1	0	4	1	2382	2744	2360	2471	139	62	183	45	13	1	1	1	0	1	1	2	1	2000	0	0	0	0
10108435	26178404	38126294	63	0	1	0	1	1	1	36	59	13	100	66	5	8	2	2	0	1	0	0		0	0	4	1	195	195	195	195	169	89	220	6	2	0	0	0	0	1	0	1	0	200	0	1	0	0
15876666	20374099	38126328	61	0	0	0	0	0	1	39	115	18	96	108	11	10	1	1	1	1	0	0		0	0	2	1	159	159	159	159	155	16	202	12	10	0	0	0	0	0	1	2	1	400	0	0	1	0
15367838	26167083	38126841	85	1	0	1	0	0	1	37	88	32	95	54	11	13	3	1	0	1	1	0	1	0	0	2	1	434	434	434	434	102	14	133	24	2	1	1	0	0	0	1	2	1	400	0	0	1	0
10528629	24649314	38134128	53	1	0	0	0	0	1	37	93	35	93	81	1	7	1	2	1	0	0	0		0	0	5	1	1909	1909	1909	1909	198	232	257	8	5	1	1	1	1	0	1	2	1	1800	0	0	0	0
10646287	23684941	38147904	88	0	0	0	0	0	1	37	73	17	98	79	18	9	1	1	1	1	0	0		0	0	2	1	395	395	395	395	152	11	198	5	1	0	0	0	0	0	1	2	1	400	0	0	1	0
19241129	29376397	38148787	60	1	1	1	0	0	0	37	87	22	99	69	12	11	2	1	0	1	1	0	0	0	1	7	1	355	355	355	355	176	60	229	14	14	0	0	0	0	1	1	1	0	200	0	1	0	0
[truncated: 452 more rows]
[truncated: 8 more columns]
